# Supplementary material for: A quantitative framework for whole-body coordination reveals specific deficits in freely walking ataxic mice
Source: eLife. 2015 Oct 3;4:e07892. doi: 10.7554/eLife.07892 (PMC4630674; doi:10.7554/eLife.07892)
Supplement: Figure 2—source data 1. — Data for the four paws (FR HR FL HL) are stored in separate columns for all variables; rows are organized stride-wise. The linear mixed model shown in Figure 2 uses speed-binned data (0.05 m/s speed bins) from the FR paw, with a minimum stride count criterion of 5 strides per bin. DOI: http://dx.doi.org/10.7554/eLife.07892.007 [file elife07892s001.xlsx]

## Sheet: DATA
FR mouse id	HR mouse id	FL mouse id	HL mouse id	FR weight (g)	HR weight (g)	FL weight (g)	HL weight (g)	FR age (days)	HR age (days)	FL age (days)	HL age (days)	FR body length (mm)	HR body length (mm)	FL body length (mm)	HL body length (mm)	FR sex	HR sex	FL sex	HL sex	FR speed (m/s)	HR speed (m/s)	FL speed (m/s)	HL speed (m/s)	FR stride length (mm)	HR stride length (mm)	FL stride length (mm)	HL stride length (mm)	FR swing velocity (m/s)	HR swing velocity (m/s)	FL swing velocity (m/s)	HL swing velocity (m/s)	FR cadence (s-1)	HR cadence (s-1)	FL cadence (s-1)	HL cadence (s-1)	FR stance duration (ms)	HR stance duration (ms)	FL stance duration (ms)	HL stance duration (ms)
G6AE1	G6AE1	G6AE1	G6AE1	27	27	27	27	100	100	100	100	92.0122	92.0122	92.0122	92.0122	MALE	MALE	MALE	MALE	0.262257	0.078286	0.0846462	0.0744036	24.9116	24.9116	14.8666	41.3854	0.296567	0.258151	0.241733	0.314718	0.0034904	0.00113443	0.0011919	0.00101885	202.5	785	777.5	850
G6AE1	G6AE1	G6AE1	G6AE1	27	27	27	27	100	100	100	100	92.0122	92.0122	92.0122	92.0122	MALE	MALE	MALE	MALE	0.0765528	0.155426	0.144493	0.193963	61.0736	54.6448	71.5204	64.288	0.331922	0.407797	0.35059	0.529119	0.00101885	0.00225225	0.00203459	0.00265604	797.5	310	287.5	255
G6AE1	G6AE1	G6AE1	G6AE1	27	27	27	27	100	100	100	100	92.0122	92.0122	92.0122	92.0122	MALE	MALE	MALE	MALE	0.2009	0.225152	0.233612	0.254894	72.324	70.7168	71.1186	68.7078	0.571731	0.582031	0.46943	0.589767	0.0026738	0.00326264	0.00328947	0.0034904	247.5	185	152.5	170
G6AE1	G6AE1	G6AE1	G6AE1	27	27	27	27	100	100	100	100	92.0122	92.0122	92.0122	92.0122	MALE	MALE	MALE	MALE	0.249209	0.227004	0.235549	0.218644	77.5474	72.324	71.1186	67.5024	0.589714	0.520317	0.414686	0.503749	0.00331675	0.00328947	0.00331675	0.00299401	170	165	130	200
G6AE1	G6AE1	G6AE1	G6AE1	27	27	27	27	100	100	100	100	92.0122	92.0122	92.0122	92.0122	MALE	MALE	MALE	MALE	0.22496	0.192226	0.214233	0.203418	70.315	70.7168	66.297	63.0826	0.464125	0.474609	0.416962	0.445813	0.00299401	0.00278552	0.00301659	0.00278552	182.5	210	172.5	217.5
G6AE1	G6AE1	G6AE1	G6AE1	27	27	27	27	100	100	100	100	92.0122	92.0122	92.0122	92.0122	MALE	MALE	MALE	MALE	0.223289	0.203567	0.192461	0.218644	67.1006	63.0826	70.315	67.5024	0.458025	0.489012	0.416065	0.503749	0.00297177	0.00294985	0.00271003	0.00299401	190	210	200	200
G6AE1	G6AE1	G6AE1	G6AE1	27	27	27	27	100	100	100	100	92.0122	97.6374	97.6374	97.6374	MALE	MALE	MALE	MALE	0.21376	0.236409	0.201199	0.23353	75.5384	71.5204	77.9492	71.1186	0.506969	0.588645	0.541314	0.493879	0.00284495	0.00318471	0.00297177	0.00318471	202.5	192.5	192.5	170
G6AE1	G6AE1	G6AE1	G6AE1	27	27	27	27	100	100	100	100	97.6374	97.6374	97.6374	97.6374	MALE	MALE	MALE	MALE	0.237606	0.254657	0.26395	0.10416	74.7348	42.189	32.9476	65.8952	0.53766	0.461082	0.430688	0.427891	0.00326264	0.00343053	0.00389864	0.00142045	167.5	200	180	550
G6AE1	G6AE1	G6AE1	G6AE1	27	27	27	27	100	100	100	100	97.6374	97.6374	97.6374	97.6374	MALE	MALE	MALE	MALE	0.104186	0.201172	0.174044	0.255946	70.7168	28.9296	14.8666	67.1006	0.424726	0.390941	0.232291	0.541134	0.00143062	0.00271003	0.00257069	0.0034904	532.5	295	325	162.5
G6AE1	G6AE1	G6AE1	G6AE1	27	27	27	27	100	100	100	100	97.6374	97.6374	97.6374	97.6374	MALE	MALE	MALE	MALE	0.23956	0.211188	0.193992	0.23353	75.5384	67.5024	71.9222	65.8952	0.543442	0.57942	0.568555	0.501104	0.00328947	0.00284495	0.00286533	0.00318471	165	235	222.5	182.5
G6AE1	G6AE1	G6AE1	G6AE1	27	27	27	27	100	100	100	100	97.6374	97.6374	97.6374	97.6374	MALE	MALE	MALE	MALE	0.230099	0.240235	0.222708	0.186113	72.7258	70.315	72.324	67.1006	0.523207	0.524739	0.511124	0.397045	0.00315956	0.00323625	0.00328947	0.00253807	177.5	175	162.5	225
G6AE1	G6AE1	G6AE1	G6AE1	27	27	27	27	100	100	100	100	97.6374	97.6374	97.6374	96.0302	MALE	MALE	MALE	MALE	0.186019	0.222253	0.191252	0.366219	71.5204	69.1096	71.5204	84.7798	0.411037	0.463823	0.411037	0.760357	0.00255428	0.00299401	0.00282486	0.00431965	217.5	185	180	120
G6AE1	G6AE1	G6AE1	G6AE1	27	27	27	27	100	100	100	100	96.0302	97.6374	97.6374	96.0302	MALE	MALE	MALE	MALE	0.40085	0.183744	0.183478	0.370217	83.1726	72.324	70.315	82.369	0.763051	0.50225	0.479966	0.79201	0.00472813	0.00247525	0.00271003	0.00436681	102.5	260	222.5	125
G6AE1	G6AE1	G6AE1	G6AE1	27	27	27	27	100	100	100	100	96.0302	96.0302	96.0302	96.0302	MALE	MALE	MALE	MALE	0.370217	0.358813	0.384902	0.354727	85.9852	83.1726	85.9852	77.9492	0.807373	0.799737	0.788855	0.699096	0.00436681	0.00436681	0.0046729	0.0041841	122.5	125	105	127.5
G6AE1	G6AE1	G6AE1	G6AE1	27	27	27	27	100	100	100	100	96.0302	96.0302	96.0302	96.0302	MALE	MALE	MALE	MALE	0.351055	0.347434	0.348283	0.362307	83.1726	83.5744	85.5834	78.7528	0.729584	0.749546	0.719188	0.739463	0.00414079	0.00422833	0.00422833	0.0042735	127.5	125	117.5	127.5
G6AE1	G6AE1	G6AE1	G6AE1	27	27	27	27	100	100	100	100	96.0302	96.0302	96.0302	92.0122	MALE	MALE	MALE	MALE	0.362307	0.340241	0.36366	0.0580727	80.7618	81.9672	80.36	28.126	0.740934	0.788146	0.689785	0.22234	0.0042735	0.00414079	0.00441501	0.000976562	125	137.5	110	897.5
G6AE1	G6AE1	G6AE1	G6AE1	27	27	27	27	100	100	100	100	92.0122	96.0302	96.0302	92.0122	MALE	MALE	MALE	MALE	0.0613669	0.3438	0.348283	0.129556	43.7962	76.7438	79.1546	27.3224	0.326837	0.737921	0.743236	0.207775	0.000983768	0.0041841	0.00422833	0.00217865	882.5	135	130	327.5
G6AE1	G6AE1	G6AE1	G6AE1	27	27	27	27	100	100	100	100	92.0122	92.0122	96.0302	92.0122	MALE	MALE	MALE	MALE	0.147121	0.111132	0.341072	0.0513084	14.8666	30.9386	77.5474	22.099	0.162477	0.304814	0.68024	0.288876	0.00235849	0.00204499	0.00414079	0.000862813	332.5	387.5	127.5	1082.5
G6AE1	G6AE1	G6AE1	G6AE1	27	27	27	27	100	100	100	100	92.0122	92.0122	92.0122	92.0122	MALE	MALE	MALE	MALE	0.0613669	0.0553678	0.140604	0.0783484	23.3044	27.3224	30.9386	26.5188	0.247919	0.245044	0.297487	0.218262	0.000983768	0.00101885	0.00262123	0.00131752	922.5	870	277.5	637.5
G6AE1	G6AE1	G6AE1	G6AE1	27	27	27	27	100	100	100	100	92.0122	92.0122	92.0122	92.0122	MALE	MALE	MALE	MALE	0.0671469	0.114047	0.0767386	0.0952987	22.099	23.7062	37.3674	34.153	0.130763	0.183769	0.156349	0.183126	0.00107643	0.00209864	0.00143062	0.00160256	760	347.5	460	437.5
G6AE1	G6AE1	G6AE1	G6AE1	27	27	27	27	100	100	100	100	92.0122	92.0122	92.0122	92.0122	MALE	MALE	MALE	MALE	0.0950182	0.037634	0.0566723	0.12099	42.189	50.6268	32.5458	57.4574	0.184231	0.233842	0.153881	0.325538	0.00152323	0.000692521	0.00105652	0.00203459	427.5	1227.5	735	315
G6AE1	G6AE1	G6AE1	G6AE1	27	27	27	27	100	100	100	100	92.0122	92.0122	92.0122	92.0122	MALE	MALE	MALE	MALE	0.128883	0.0959284	0.103353	0.12816	60.27	44.5998	19.2864	52.234	0.323164	0.352568	0.155535	0.309077	0.00206612	0.00176523	0.00192678	0.00215517	297.5	440	395	295
G6AE1	G6AE1	G6AE1	G6AE1	27	27	27	27	100	100	100	100	92.0122	92.0122	92.0122	92.0122	MALE	MALE	MALE	MALE	0.127565	0.121032	0.0388276	0.117989	60.27	55.4484	48.216	60.6718	0.302864	0.318669	0.212874	0.202916	0.00204499	0.00222717	0.000723851	0.00198413	290	275	1155	205
G6AE1	G6AE1	G6AE1	G6AE1	27	27	27	27	100	100	100	100	92.0122	92.0122	92.0122	92.0122	MALE	MALE	MALE	MALE	0.174977	0.132062	0.0877192	0.142776	63.0826	57.8592	53.0376	26.117	0.357408	0.423877	0.313832	0.210621	0.00280505	0.00243013	0.00163532	0.00240096	180	275	442.5	292.5
G6AE1	G6AE1	G6AE1	G6AE1	27	27	27	27	100	100	100	100	92.0122	92.0122	92.0122	92.0122	MALE	MALE	MALE	MALE	0.0849856	0.144339	0.118805	0.332215	43.3944	49.4214	55.8502	15.6702	0.155535	0.331687	0.295504	0.244847	0.0013624	0.00265604	0.00221484	0.00558659	455	227.5	262.5	115
G6AE1	G6AE1	G6AE1	G6AE1	27	27	27	27	100	100	100	100	92.0122	92.0122	92.0122	92.0122	MALE	MALE	MALE	MALE	0.107273	0.0695374	0.12802	0.114579	63.0826	52.6358	67.5024	51.4304	0.202512	0.325918	0.431325	0.255238	0.00171969	0.00127959	0.00238663	0.00192678	270	620	262.5	317.5
G6AE1	G6AE1	G6AE1	G6AE1	27	27	27	27	100	100	100	100	96.432	96.432	92.0122	96.432	MALE	MALE	MALE	MALE	0.298582	0.310907	0.147363	0.366839	78.351	77.5474	40.9836	79.4244	0.644864	0.745648	0.266127	0.615693	0.00393701	0.00422833	0.00274725	0.00490196	132.5	132.5	210	75
G6AE1	G6AE1	G6AE1	G6AE1	27	27	27	27	100	100	100	100	96.432	96.432	92.0122	96.432	MALE	MALE	MALE	MALE	0.3463	0.335751	0.0682013	0.345659	80.7618	79.1546	64.6898	62.6808	0.708437	0.726189	0.317107	0.819357	0.00456621	0.00456621	0.00127146	0.00461894	105	110	582.5	140
G6AE1	G6AE1	G6AE1	G6AE1	27	27	27	27	100	100	100	100	96.432	96.432	96.432	96.432	MALE	MALE	MALE	MALE	0.327602	0.321089	0.339751	0.309877	81.9672	81.5654	79.5564	71.1186	0.674627	0.715486	0.764965	0.623847	0.00431965	0.00436681	0.00431965	0.00414079	110	115	127.5	127.5
G6AE1	G6AE1	G6AE1	G6AE1	27	27	27	27	100	100	100	100	96.432	96.432	96.432	96.432	MALE	MALE	MALE	MALE	0.342392	0.30447	0.35509	0.288939	67.5024	61.0736	80.36	61.8772	0.619288	0.587246	0.720717	0.658268	0.00451467	0.00414079	0.00451467	0.003861	112.5	137.5	110	165
G6AE1	G6AE1	G6AE1	G6AE1	27	27	27	27	100	100	100	100	96.432	96.432	96.432	96.432	MALE	MALE	MALE	MALE	0.298582	0.295299	0.35509	0.280808	67.9042	69.9132	73.9312	70.315	0.637598	0.672242	0.66306	0.567056	0.00393701	0.00401606	0.00451467	0.00375235	147.5	145	110	142.5
G6AE1	G6AE1	G6AE1	G6AE1	27	27	27	27	100	100	100	100	96.432	90.0032	96.432	90.0032	MALE	MALE	MALE	MALE	0.287272	0.297814	0.34346	0.254423	75.1366	68.306	58.6628	69.5114	0.582454	0.61261	0.624072	0.584129	0.00378788	0.00414079	0.00436681	0.00375235	135	130	135	147.5
G6AE1	G6AE1	G6AE1	G6AE1	27	27	27	27	100	100	100	100	90.0032	90.0032	96.432	90.0032	MALE	MALE	MALE	MALE	0.248243	0.272433	0.281908	0.272304	71.1186	65.4934	75.1366	62.279	0.66778	0.587385	0.593965	0.558556	0.00409836	0.00378788	0.00358423	0.00401606	137.5	152.5	152.5	137.5
G6AE1	G6AE1	G6AE1	G6AE1	27	27	27	27	100	100	100	100	90.0032	90.0032	90.0032	90.0032	MALE	MALE	MALE	MALE	0.229437	0.285973	0.225655	0.261791	69.5114	73.1276		64.288	0.560576	0.655853		0.603643	0.00378788	0.00397614	0.00315956	0.003861	140	140	185	152.5
G6AE1	G6AE1	G6AE1	G6AE1	27	27	27	27	100	100	100	100	90.0032	90.0032	90.0032	90.0032	MALE	MALE	MALE	MALE	0.215174	0.251037	0.311878	0.249738	75.9402	62.279	64.288	69.1096	0.546332	0.546307	0.603643	0.506297	0.0035524	0.0034904	0.00436681	0.00368324	142.5	172.5	122.5	135
G6AE1	G6AE1	G6AE1	G6AE1	27	27	27	27	100	100	100	100	90.0032	90.0032	90.0032	90.0032	MALE	MALE	MALE	MALE	0.289815	0.221982	0.255985	0.21423	60.27	70.315	69.9132	61.4754	0.608788	0.534715	0.531659	0.442269	0.00478469	0.00308642	0.00358423	0.00315956	110	192.5	147.5	177.5
G6AE1	G6AE1	G6AE1	G6AE1	27	27	27	27	100	100	100	100	90.0032	93.2176	90.0032	90.0032	MALE	MALE	MALE	MALE	0.167556	0.285136	0.286827	0.18375	75.9402	66.297	73.1276	61.4754	0.477611	0.653172	0.614518	0.392814	0.00276625	0.00393701	0.00401606	0.00271003	202.5	152.5	130	212.5
G6AE1	G6AE1	G6AE1	G6AE1	27	27	27	27	100	100	100	100	90.0032	93.2176	90.0032	93.2176	MALE	MALE	MALE	MALE	0.191379	0.282357	0.245008	0.264476	57.0556	69.1096	63.4844	63.4844	0.451032	0.664515	0.473764	0.556881	0.00315956	0.00389864	0.00343053	0.00361664	190	152.5	157.5	162.5
G6AE1	G6AE1	G6AE1	G6AE1	27	27	27	27	100	100	100	100	93.2176	93.2176	90.0032	93.2176	MALE	MALE	MALE	MALE	0.257786	0.282357	0.222146	0.285098	70.315	63.0826	64.6898	65.8952	0.616798	0.621503	0.449235	0.578028	0.00358423	0.00389864	0.00311042	0.00389864	165	155	177.5	142.5
G6AE1	G6AE1	G6AE1	G6AE1	27	27	27	27	100	100	100	100	93.2176	93.2176	93.2176	93.2176	MALE	MALE	MALE	MALE	0.269877	0.20752	0.284375	0.282346	70.315	52.6358	68.306	65.0916	0.55585	0.626617	0.599175	0.570979	0.00375235	0.00286533	0.00397614	0.003861	140	265	137.5	145
G6AE1	G6AE1	G6AE1	G6AE1	27	27	27	27	100	100	100	100	93.2176	93.2176	93.2176	93.2176	MALE	MALE	MALE	MALE	0.304111	0.303031	0.263427	0.27185	64.288	70.7168	71.1186	46.6088	0.633379	0.732817	0.562202	0.448162	0.00422833	0.0041841	0.00368324	0.00371747	135	142.5	145	165
G6AE1	G6AE1	G6AE1	G6AE1	27	27	27	27	100	100	100	100	93.2176	93.2176	93.2176	93.2176	MALE	MALE	MALE	MALE	0.348292	0.25728	0.312316	0.223974	34.5548	70.315	55.8502	69.1096	0.561867	0.524739	0.578759	0.593215	0.00484262	0.0035524	0.00436681	0.00306279	145	147.5	132.5	210
G6AE1	G6AE1	G6AE1	G6AE1	27	27	27	27	100	100	100	100	93.2176	94.8248	93.2176	93.2176	MALE	MALE	MALE	MALE	0.17693	0.279943	0.196485	0.299703	74.7348	76.342	64.288	66.6988	0.615101	0.734058	0.540235	0.598196	0.00246002	0.00409836	0.00274725	0.00409836	285	140	245	132.5
G6AE1	G6AE1	G6AE1	G6AE1	27	27	27	27	100	100	100	100	93.2176	94.8248	93.2176	94.8248	MALE	MALE	MALE	MALE	0.304111	0.2663	0.299249	0.270287	71.5204	73.5294	70.7168	73.5294	0.613909	0.674582	0.648778	0.592979	0.00422833	0.00389864	0.0041841	0.00401606	120	147.5	130	125
G6AE1	G6AE1	G6AE1	G6AE1	27	27	27	27	100	100	100	100	94.8248	94.8248	93.2176	94.8248	MALE	MALE	MALE	MALE	0.259395	0.24265	0.258663	0.270287	77.1456	76.342	69.1096	69.9132	0.648282	0.559282	0.488407	0.587506	0.00401606	0.0035524	0.00361664	0.00401606	130	145	135	130
G6AE1	G6AE1	G6AE1	G6AE1	27	27	27	27	100	100	100	100	94.8248	94.8248	94.8248	94.8248	MALE	MALE	MALE	MALE	0.246996	0.217535	0.226666	0.217804	77.5474	63.4844	79.9582	71.5204	0.601143	0.482771	0.644824	0.523959	0.00382409	0.00318471	0.00371747	0.00323625	132.5	182.5	145	172.5
G6AE1	G6AE1	G6AE1	G6AE1	27	27	27	27	100	100	100	100	94.8248	94.8248	94.8248	94.8248	MALE	MALE	MALE	MALE	0.209027	0.194327	0.244872	0.187469	73.5294	65.8952	75.9402	59.4664	0.510621	0.618734	0.638153	0.47009	0.00323625	0.00284495	0.00401606	0.00278552	165	245	130	232.5
G6AE1	G6AE1	G6AE1	G6AE1	27	27	27	27	100	100	100	100	94.8248	97.2356	94.8248	97.2356	MALE	MALE	MALE	MALE	0.189134	0.260008	0.20917	0.341486	63.4844	80.36	76.7438	64.6898	0.473764	0.599701	0.515059	0.567454	0.00292826	0.00340136	0.00343053	0.00441501	207.5	160	142.5	112.5
G6AE1	G6AE1	G6AE1	G6AE1	27	27	27	27	100	100	100	100	97.2356	97.2356	94.8248	97.2356	MALE	MALE	MALE	MALE	0.277948	0.269164	0.179862	0.284886	81.9672	73.5294	65.4934	76.342	0.647962	0.548727	0.39935	0.549223	0.00358423	0.00352113	0.00294985	0.00368324	152.5	150	175	132.5
G6AE1	G6AE1	G6AE1	G6AE1	27	27	27	27	100	100	100	100	97.2356	97.2356	94.8248	97.2356	MALE	MALE	MALE	MALE	0.280461	0.212932	0.207392	0.282286	82.7708	73.5294	55.8502	71.1186	0.564988	0.519642	0.512387	0.585338	0.00361664	0.00278552	0.00340136	0.00364964	130	217.5	185	152.5
G6AE1	G6AE1	G6AE1	G6AE1	27	27	27	27	100	100	100	100	97.2356	100.048	97.2356	97.2356	MALE	MALE	MALE	MALE	0.277948	0.311642	0.224958	0.229856	78.351	68.306	74.7348	67.5024	0.563676	0.61261	0.701735	0.4116	0.00358423	0.00409836	0.00311042	0.00297177	140	132.5	215	172.5
G6AE1	G6AE1	G6AE1	G6AE1	27	27	27	27	100	100	100	100	97.2356	100.048	97.2356	97.2356	MALE	MALE	MALE	MALE	0.232178	0.270127	0.268862	0.231576	72.7258	69.5114	83.1726	71.1186	0.424057	0.596664	0.609323	0.46943	0.00299401	0.0035524	0.00371747	0.00299401	162.5	165	132.5	182.5
G6AE1	G6AE1	G6AE1	G6AE1	27	27	27	27	100	100	100	100	97.2356	100.048	97.2356	100.048	MALE	MALE	MALE	MALE	0.227079	0.308481	0.266387	0.23908	76.7438	77.1456	75.5384	86.387	0.460924	0.662194	0.585569	0.543314	0.00292826	0.0040568	0.00368324	0.00301659	175	130	142.5	172.5
G6AE1	G6AE1	G6AE1	G6AE1	27	27	27	27	100	100	100	100	100.048	100.048	97.2356	100.048	MALE	MALE	MALE	MALE	0.139194	0.288033	0.26157	0.267302		77.5474	72.7258	67.1006		0.651659	0.553048	0.552268	0.00176523	0.00378788	0.00361664	0.00337268	455	145	145	175
G6AE1	G6AE1	G6AE1	G6AE1	27	27	27	27	100	100	100	100	100.048	100.048	97.2356	100.048	MALE	MALE	MALE	MALE	0.326514	0.314868	0.198692	0.318293	71.1186	74.333	75.9402	71.9222	0.700676	0.71474	0.509666	0.708593	0.00414079	0.00414079	0.00274725	0.00401606	140	137.5	215	147.5
G6AE1	G6AE1	G6AE1	G6AE1	27	28	27	27	100	101	100	100	100.048	89.1996	97.2356	100.048	MALE	MALE	MALE	MALE	0.272849	0.102611	0.21983	0.308987	71.5204	57.4574	69.5114	71.5204	0.533734	0.312268	0.518742	0.687696	0.00346021	0.00226501	0.00303951	0.00389864	155	257.5	195	152.5
G6AE1	G6AE1	G6AE1	G6AE1	27	28	27	27	100	101	100	100	100.048	89.1996	100.048	100.048	MALE	MALE	MALE	MALE	0.301542	0.108122	0.0879146	0.321522	83.136	52.234	73.5294	72.324	0.388486	0.389806	0.674582	0.695423	0.00382409	0.00238663	0.00110926	0.0040568	47.5	285	792.5	142.5
G6AE1	G6AE1	G6AE1	G6AE1	27	28	27	28	100	101	100	101	100.048	89.1996	100.048	89.1996	MALE	MALE	MALE	MALE	0.304453	0.0917064	0.291915	0.0571526	79.1546	32.9476	74.333	57.4574	0.590706	0.324607	0.525322	0.355773	0.003861	0.00202429	0.00368324	0.00215517	125	392.5	130	302.5
G6AE1	G6AE1	G6AE1	G6AE1	27	28	27	28	100	101	100	101	100.048	89.1996	100.048	89.1996	MALE	MALE	MALE	MALE	0.326514	0.256674	0.276632	0.0553628	76.7438	28.126	76.7438	53.0376	0.644906	0.345104	0.583603	0.244977	0.00414079	0.00566572	0.0034904	0.00208768	122.5	95	155	262.5
G6AE1	G6AE1	G6AE1	G6AE1	28	28	27	28	101	101	100	101	89.1996	89.1996	100.048	89.1996	MALE	MALE	MALE	MALE	0.0609834	0.0885688	0.318293	0.0415005	53.8412	56.252	78.351	58.261	0.323371	0.305717	0.607372	0.296494	0.00229095	0.00195503	0.00401606	0.00156495	270	327.5	120	442.5
G6AE1	G6AE1	G6AE1	G6AE1	28	28	27	28	101	101	100	101	89.1996	89.1996	100.048	89.1996	MALE	MALE	MALE	MALE	0.0512895	0.109427	0.308987	0.0571526	66.297	63.0826	78.351	57.8592	0.239772	0.438074	0.607372	0.4018	0.00192678	0.00241546	0.00389864	0.00215517	242.5	270	127.5	320
G6AE1	G6AE1	G6AE1	G6AE1	28	28	27	28	101	101	100	101	89.1996	89.1996	100.048	89.1996	MALE	MALE	MALE	MALE	0.0419862	0.0890038	0.303079	0.0690594	63.0826	31.7422	77.5474	55.8502	0.261212	0.414931	0.557895	0.416793	0.00157729	0.00196464	0.00382409	0.00260417	392.5	432.5	122.5	250
G6AE1	G6AE1	G6AE1	G6AE1	28	28	28	28	101	101	101	101	89.1996	95.2266	89.1996	89.1996	MALE	MALE	MALE	MALE	0.0599533	0.311741	0.0781637	0.0201817	62.6808	75.1366	65.8952	22.9026	0.407018	0.673871	0.3441	0.26477	0.00225225	0.0040568	0.00214362	0.000761035	290	135	275	1227.5
G6AE1	G6AE1	G6AE1	G6AE1	28	28	28	28	101	101	101	101	89.1996	95.2266	89.1996	95.2266	MALE	MALE	MALE	MALE	0.067993	0.305544	0.0803157	0.347434	66.297	77.9492	55.4484	77.5474	0.416962	0.71513	0.318669	0.651659	0.00255428	0.00397614	0.00220264	0.00422833	232.5	142.5	280	117.5
G6AE1	G6AE1	G6AE1	G6AE1	28	28	28	28	101	101	101	101	89.1996	95.2266	89.1996	95.2266	MALE	MALE	MALE	MALE	0.0202582	0.305544	0.0781637	0.329992	28.9296	77.9492	37.7692	72.324	0.132099	0.669092	0.28186	0.663523	0.000761035	0.00397614	0.00214362	0.00401606	1095	135	332.5	140
G6AE1	G6AE1	G6AE1	G6AE1	28	28	28	28	101	101	101	101	95.2266	95.2266	89.1996	95.2266	MALE	MALE	MALE	MALE	0.368167	0.285666	0.192928	0.329992	75.5384	77.9492	20.4918	74.7348	0.677474	0.683765	0.165256	0.701735	0.00446429	0.00371747	0.00529101	0.00401606	112.5	155	65	142.5
G6AE1	G6AE1	G6AE1	G6AE1	28	28	28	28	101	101	101	101	95.2266	95.2266	89.1996	95.2266	MALE	MALE	MALE	MALE	0.318415	0.293859	0.064366	0.314218	79.9582	71.5204	62.279	74.7348	0.671918	0.641439	0.233692	0.68564	0.003861	0.00382409	0.00176523	0.00382409	140	150	300	152.5
G6AE1	G6AE1	G6AE1	G6AE1	28	28	28	28	101	101	101	101	95.2266	76.342	89.1996	95.2266	MALE	MALE	MALE	MALE	0.324683	0.298809	0.0981517	0.302645	79.5564	71.1186	61.0736	75.5384	0.641584	0.511645	0.336494	0.709281	0.00393701	0.00337268	0.00269179	0.00368324	130	157.5	190	165
G6AE1	G6AE1	G6AE1	G6AE1	28	28	28	28	101	101	101	101	95.2266	76.342	89.1996	76.342	MALE	MALE	MALE	MALE	0.306578	0.0531635	0.0968482	0.329126	79.1546	50.6268	12.054	38.9746	0.613602	0.498786	0.246	0.393683	0.00371747	0.00060006	0.00265604	0.00378788	140	1565	327.5	165
G6AE1	G6AE1	G6AE1	G6AE1	28	28	28	28	101	101	101	101	95.2266	76.342	95.2266	76.342	MALE	MALE	MALE	MALE	0.306578	0.399986	0.335784	0.0522957	79.5564	79.5564	76.7438	76.7438	0.616716	0.783807	0.704072	0.618902	0.00371747	0.00451467	0.0040568	0.000601866	140	120	137.5	1537.5
G6AE1	G6AE1	G6AE1	G6AE1	28	28	28	28	101	101	101	101	76.342	76.342	95.2266	76.342	MALE	MALE	MALE	MALE	0.356878	0.386886	0.316523	0.410824	53.0376	86.7888	78.7528	83.5744	0.579646	0.69991	0.648171	0.551646	0.00414079	0.00436681	0.00382409	0.00472813	150	105	140	60
G6AE1	G6AE1	G6AE1	G6AE1	28	28	28	28	101	101	101	101	76.342	76.342	95.2266	76.342	MALE	MALE	MALE	MALE	0.0512555	0.326324	0.313526	0.348953	79.9582	86.7888	80.7618	83.9762	0.671918	0.613348	0.6027	0.663843	0.000594707	0.00368324	0.00378788	0.00401606	1562.5	130	130	122.5
G6AE1	G6AE1	G6AE1	G6AE1	28	28	28	28	101	101	101	101	76.342	94.0212	95.2266	76.342	MALE	MALE	MALE	MALE	0.376359	0.384227	0.304865	0.298076	87.9942	75.9402	79.9582	80.7618	0.682126	0.748179	0.585774	0.58102	0.00436681	0.00472813	0.00368324	0.00343053	100	110	135	152.5
G6AE1	G6AE1	G6AE1	G6AE1	28	28	28	28	101	101	101	101	76.342	94.0212	76.342	94.0212	MALE	MALE	MALE	MALE	0.336008	0.319937	0.314247	0.326197	89.1996	73.5294	66.6988	78.7528	0.608871	0.559159	0.572522	0.622552	0.00389864	0.00393701	0.00361664	0.00422833	110	122.5	160	110
G6AE1	G6AE1	G6AE1	G6AE1	28	28	28	28	101	101	101	101	76.342	94.0212	76.342	94.0212	MALE	MALE	MALE	MALE	0.295664	0.269533	0.0519828	0.284146	83.5744	61.4754	63.0826	59.0646	0.534022	0.605669	0.409627	0.44916	0.00343053	0.00331675	0.000598265	0.00368324	135	200	1517.5	140
G6AE1	G6AE1	G6AE1	G6AE1	28	28	28	28	101	101	101	101	94.0212	94.0212	76.342	94.0212	MALE	MALE	MALE	MALE	0.325476	0.329672	0.348953	0.26694	81.9672	77.1456	83.1726	68.7078	0.6888	0.760055	0.729584	0.616213	0.00436681	0.0040568	0.00401606	0.00346021	110	145	135	177.5
G6AE1	G6AE1	G6AE1	G6AE1	28	28	28	28	101	101	101	101	94.0212	94.0212	76.342	94.0212	MALE	MALE	MALE	MALE	0.282325	0.326362	0.348953	0.312964	56.252	77.9492	89.1996	73.9312	0.493439	0.731917	0.608871	0.621271	0.00378788	0.00401606	0.00401606	0.0040568	150	142.5	102.5	127.5
G6AE1	G6AE1	G6AE1	G6AE1	28	28	28	28	101	101	101	101	94.0212	94.8248	76.342	94.0212	MALE	MALE	MALE	MALE	0.251379	0.307666	0.320034	0.309822	79.5564	81.1636	86.7888	71.1186	0.668541	0.799641	0.521254	0.61046	0.00337268	0.0040568	0.00368324	0.00401606	177.5	145	105	132.5
G6AE1	G6AE1	G6AE1	G6AE1	28	28	28	28	101	101	101	101	94.0212	94.8248	94.0212	94.8248	MALE	MALE	MALE	MALE	0.285024	0.354391	0.362799	0.361428	83.1726	79.1546	84.7798	77.9492	0.632491	0.709907	0.727724	0.787366	0.00382409	0.0046729	0.00451467	0.00478469	130	102.5	105	110
G6AE1	G6AE1	G6AE1	G6AE1	28	28	28	28	101	101	101	101	94.0212	94.8248	94.0212	94.8248	MALE	MALE	MALE	MALE	0.325476	0.342392	0.384498	0.337225	71.1186	86.7888	63.0826	77.5474	0.700676	0.796228	0.708793	0.824972	0.00436681	0.00451467	0.00478469	0.00446429	127.5	112.5	120	130
G6AE1	G6AE1	G6AE1	G6AE1	28	28	28	28	101	101	101	101	94.8248	94.8248	94.0212	94.8248	MALE	MALE	MALE	MALE	0.325245	0.314036	0.244255	0.31606	84.7798	82.369	69.1096	85.9852	0.727724	0.755679	0.580753	0.693429	0.00461894	0.00414079	0.00303951	0.0041841	100	132.5	210	115
G6AE1	G6AE1	G6AE1	G6AE1	28	28	28	28	101	101	101	101	94.8248	94.8248	94.0212	94.8248	MALE	MALE	MALE	MALE	0.291575	0.262421	0.298736	0.26598	91.6104	70.315	78.351	67.1006	0.724193	0.728653	0.644864	0.53044	0.00414079	0.00346021	0.00371747	0.00352113	115	192.5	147.5	157.5
G6AE1	G6AE1	G6AE1	G6AE1	28	28	28	28	101	101	101	101	94.8248	96.432	94.0212	96.432	MALE	MALE	MALE	MALE	0.314355	0.415253	0.332754	0.401341	83.1726	84.378	73.5294	78.351	0.670747	0.792282	0.644995	0.753375	0.00446429	0.00446429	0.00414079	0.00456621	100	117.5	127.5	115
G6AE1	G6AE1	G6AE1	G6AE1	28	28	28	28	101	101	101	101	94.8248	96.432	94.8248	96.432	MALE	MALE	MALE	MALE	0.277226	0.4018	0.349333	0.383816	66.297	81.9672	81.9672	80.7618	0.534653	0.788146	0.751993	0.740934	0.00393701	0.00431965	0.00446429	0.00436681	130	127.5	115	120
G6AE1	G6AE1	G6AE1	G6AE1	28	28	28	28	101	101	101	101	96.432	96.432	94.8248	96.432	MALE	MALE	MALE	MALE	0.361878	0.415253	0.334404	0.371644	85.5834	84.378	85.9852	82.7708	0.750732	0.792282	0.618599	0.742339	0.0042735	0.00446429	0.0042735	0.00422833	120	117.5	95	125
G6AE1	G6AE1	G6AE1	G6AE1	28	28	28	28	101	101	101	101	96.432	96.432	94.8248	96.432	MALE	MALE	MALE	MALE	0.361878	0.385162	0.338015	0.383816	83.9762	86.387	92.414	81.9672	0.720826	0.811146	0.664849	0.735132	0.0042735	0.00414079	0.00431965	0.00436681	117.5	135	92.5	117.5
G6AE1	G6AE1	G6AE1	G6AE1	28	28	28	28	101	101	101	101	96.432	92.8158	94.8248	96.432	MALE	MALE	MALE	MALE	0.365786	0.1517	0.38834	0.379671	86.7888	50.6268	61.8772	76.7438	0.744968	0.370892	0.658268	0.704072	0.00431965	0.00340136	0.00496278	0.00431965	115	157.5	107.5	122.5
G6AE1	G6AE1	G6AE1	G6AE1	28	28	28	28	101	101	101	101	96.432	92.8158	94.8248	92.8158	MALE	MALE	MALE	MALE	0.343527	0.076044	0.261708	0.196975	91.2086	40.5818	74.7348	71.5204	0.680661	0.483117	0.6415	0.523959	0.0040568	0.00170503	0.00334448	0.0035524	112.5	502.5	182.5	145
G6AE1	G6AE1	G6AE1	G6AE1	28	28	28	28	101	101	101	101	96.432	92.8158	96.432	92.8158	MALE	MALE	MALE	MALE	0.386664	0.162773	0.358338	0.144397	83.9762	72.324	82.7708	32.9476	0.736633	0.663523	0.667506	0.392233	0.00456621	0.00364964	0.00441501	0.00260417	105	165	102.5	300
G6AE1	G6AE1	G6AE1	G6AE1	28	28	28	28	101	101	101	101	92.8158	92.8158	96.432	92.8158	MALE	MALE	MALE	MALE	0.228736	0.122527	0.336081	0.111119	68.7078	48.6178	86.7888	58.6628	0.6027	0.362819	0.672781	0.514586	0.00401606	0.00274725	0.00414079	0.00200401	135	230	112.5	385
G6AE1	G6AE1	G6AE1	G6AE1	28	28	28	28	101	101	101	101	92.8158	92.8158	96.432	92.8158	MALE	MALE	MALE	MALE	0.166779	0.126884	0.343186	0.222684	24.108	49.0196	87.5924	59.4664	0.42669	0.449721	0.641703	0.479568	0.00292826	0.00284495	0.00422833	0.00401606	285	242.5	100	125
G6AE1	G6AE1	G6AE1	G6AE1	28	28	28	28	101	101	101	101	92.8158	92.8158	96.432	92.8158	MALE	MALE	MALE	MALE	0.100097	0.134539	0.388343	0.133933	75.9402	55.4484	77.9492	45.8052	0.556338	0.533158	0.749512	0.451283	0.00175747	0.00301659	0.00478469	0.00241546	432.5	227.5	105	312.5
G6AE1	G6AE1	G6AE1	G6AE1	28	28	28	28	101	101	101	101	92.8158	92.8158	92.8158	92.8158	MALE	MALE	MALE	MALE	0.272513	0.158436	0.188344	0.156634	57.0556	26.9206	79.5564	45.0016	0.623558	0.390154	0.543047	0.443366	0.00478469	0.0035524	0.00378788	0.00282486	117.5	212.5	117.5	252.5
G6AE1	G6AE1	G6AE1	G6AE1	28	28	28	28	101	101	101	101	92.8158	92.8158	92.8158	92.8158	MALE	MALE	MALE	MALE	0.126849	0.253788	0.227045	0.196975	52.6358	75.1366	34.9566	47.4124	0.359289	0.644949	0.428915	0.478913	0.00222717	0.00378788	0.00456621	0.0035524	302.5	147.5	137.5	182.5
G6AE1	G6AE1	G6AE1	G6AE1	28	28	28	28	101	101	101	101	92.8158	92.8158	92.8158	92.8158	MALE	MALE	MALE	MALE	0.159762	0.26378	0.074324	0.281562	55.0466	76.342	36.5638	69.5114	0.36944	0.752138	0.294869	0.584129	0.00280505	0.00393701	0.00149477	0.00375235	207.5	152.5	545	147.5
G6AE1	G6AE1	G6AE1	G6AE1	28	28	28	28	101	101	101	101	92.8158	92.8158	92.8158	92.8158	MALE	MALE	MALE	MALE	0.185824	0.266402	0.201715	0.313959	54.6448	78.351	71.1186	75.9402	0.41555	0.718817	0.623847	0.651847	0.00326264	0.00397614	0.0040568	0.0041841	175	142.5	132.5	122.5
G6AE1	G6AE1	G6AE1	G6AE1	28	28	28	28	101	101	101	101	92.8158	92.8158	92.8158	92.8158	MALE	MALE	MALE	MALE	0.245259	0.26378	0.141459	0.298354	78.351	81.9672	46.6088	74.7348	0.658412	0.6888	0.271771	0.655568	0.00364964	0.00393701	0.00284495	0.00397614	155	135	180	137.5
G6AE1	G6AE1	G6AE1	G6AE1	28	28	28	28	101	101	101	101	92.8158	92.8158	92.8158	92.8158	MALE	MALE	MALE	MALE	0.245259	0.211691	0.145601	0.250957	77.1456	60.6718	45.8052	70.7168	0.662194	0.556622	0.4018	0.44476	0.00364964	0.00315956	0.00292826	0.00334448	157.5	207.5	227.5	140
G6AE1	G6AE1	G6AE1	G6AE1	28	28	28	28	101	101	101	101	92.8158	95.2266	92.8158	95.2266	MALE	MALE	MALE	MALE	0.264571	0.408095	0.15229	0.364647	82.369	79.5564	55.8502	68.7078	0.638519	0.729875	0.512387	0.711998	0.00393701	0.00522193	0.00306279	0.00456621	125	82.5	217.5	122.5
G6AE1	G6AE1	G6AE1	G6AE1	28	28	28	28	101	101	101	101	92.8158	95.2266	92.8158	95.2266	MALE	MALE	MALE	MALE	0.264571	0.35685	0.160915	0.330674	84.378	74.333	39.7782	78.351	0.66702	0.71474	0.341444	0.563676	0.00393701	0.00456621	0.00323625	0.00414079	127.5	115	192.5	102.5
G6AE1	G6AE1	G6AE1	G6AE1	28	28	28	28	101	101	101	101	92.8158	95.2266	92.8158	95.2266	MALE	MALE	MALE	MALE	0.275414	0.365187	0.254423	0.224005	61.0736	44.198	75.1366	40.18	0.535733	0.577752	0.550451	0.525229	0.00409836	0.0046729	0.00375235	0.00280505	130	137.5	130	280
G6AE1	G6AE1	G6AE1	G6AE1	28	28	28	28	101	101	101	101	92.8158	95.2266	92.8158	95.2266	MALE	MALE	MALE	MALE	0.189833	0.203516	0.261791	0.352573	64.6898	69.9132	78.351	73.5294	0.48276	0.6888	0.644864	0.761963	0.00282486	0.00260417	0.003861	0.00441501	220	282.5	137.5	130
G6AE1	G6AE1	G6AE1	G6AE1	28	28	28	28	101	101	101	101	95.2266	95.2266	92.8158	95.2266	MALE	MALE	MALE	MALE	0.342788	0.333975	0.275066	0.314401	75.9402	77.1456	76.7438	72.324	0.666142	0.691889	0.60667	0.663523	0.00431965	0.0042735	0.0040568	0.00393701	117.5	122.5	120	145
G6AE1	G6AE1	G6AE1	G6AE1	28	28	28	28	101	101	101	101	95.2266	95.2266	92.8158	92.8158	MALE	MALE	MALE	MALE	0.366538	0.313856	0.280761	0.265647	68.306	75.1366	77.9492	67.9042	0.656788	0.673871	0.616199	0.595651	0.00461894	0.00401606	0.00414079	0.00368324	112.5	137.5	115	157.5
G6AE1	G6AE1	G6AE1	G6AE1	28	28	28	28	101	101	101	101	95.2266	92.8158	92.8158	92.8158	MALE	MALE	MALE	MALE	0.21801	0.249986	0.204536	0.278468	49.0196	68.306	61.4754	75.1366	0.471342	0.61261	0.434455	0.644949	0.00274725	0.0034904	0.00301659	0.003861	260	175	190	142.5
G6AE1	G6AE1	G6AE1	G6AE1	28	28	28	28	101	101	101	101	95.2266	92.8158	95.2266	92.8158	MALE	MALE	MALE	MALE	0.339126	0.279224	0.344848	0.281182	77.5474	75.9402	71.1186	75.1366	0.728145	0.713054	0.82218	0.644949	0.0042735	0.00389864	0.00446429	0.00389864	127.5	150	137.5	140
G6AE1	G6AE1	G6AE1	G6AE1	28	28	28	28	101	101	101	101	95.2266	92.8158	95.2266	92.8158	MALE	MALE	MALE	MALE	0.318697	0.279224	0.310225	0.247421	78.7528	79.1546	83.5744	65.4934	0.661788	0.761102	0.673987	0.517734	0.00401606	0.00389864	0.00401606	0.00343053	130	152.5	125	165
G6AE1	G6AE1	G6AE1	G6AE1	28	28	28	28	101	101	101	101	92.8158	92.8158	95.2266	93.2176	MALE	MALE	MALE	MALE	0.256668	0.26139	0.360963	0.254667	79.9582	72.7258	30.9386	30.135	0.619831	0.598566	0.465242	0.320585	0.00334448	0.00364964	0.0046729	0.00361664	170	152.5	147.5	182.5
G6AE1	G6AE1	G6AE1	G6AE1	28	28	28	28	101	101	101	101	92.8158	92.8158	95.2266	93.2176	MALE	MALE	MALE	MALE	0.296308	0.235595	0.20248	0.187026	81.5654	70.7168	78.351	35.3584	0.63229	0.570297	0.658412	0.317116	0.003861	0.00328947	0.00262123	0.00265604	130	180	262.5	265
G6AE1	G6AE1	G6AE1	G6AE1	28	28	28	28	101	101	101	101	92.8158	93.2176	95.2266	93.2176	MALE	MALE	MALE	MALE	0.321104	0.11891	0.323205	0.294625	75.9402	68.6986	75.5384	20.09	0.651847	0.257781	0.585569	0.291159	0.0041841	0.00165563	0.0041841	0.0041841	122.5	337.5	110	170
G6AE1	G6AE1	G6AE1	G6AE1	28	28	28	28	101	101	101	101	92.8158	93.2176	95.2266	93.2176	MALE	MALE	MALE	MALE	0.248362	0.116029	0.323205	0.168056	73.1276	61.8772	72.7258	65.8952	0.526098	0.489148	0.611141	0.395767	0.00323625	0.00161551	0.0041841	0.00238663	170	492.5	120	252.5
G6AE1	G6AE1	G6AE1	G6AE1	28	28	28	28	101	101	101	101	93.2176	93.2176	92.8158	93.2176	MALE	MALE	MALE	MALE	0.26209	0.180004	0.249417	0.197519	29.3314	70.7168	69.9132	70.7168	0.231869	0.466778	0.541963	0.53777	0.00352113	0.00250627	0.00340136	0.00280505	157.5	247.5	165	225
G6AE1	G6AE1	G6AE1	G6AE1	28	28	28	28	101	101	101	101	93.2176	93.2176	92.8158	93.2176	MALE	MALE	MALE	MALE	0.222855	0.215035	0.267622	0.207715	29.7332	70.315	80.36	65.4934	0.308116	0.471913	0.599701	0.479805	0.00299401	0.00299401	0.00364964	0.00294985	237.5	185	140	202.5
G6AE1	G6AE1	G6AE1	G6AE1	28	28	28	28	101	101	101	101	93.2176	93.2176	92.8158	93.2176	MALE	MALE	MALE	MALE	0.259803	0.208784	0.303638	0.200328	22.5008	67.9042	76.7438	61.8772	0.189082	0.471557	0.673191	0.470549	0.0034904	0.00290698	0.00414079	0.00284495	167.5	200	127.5	220
G6AE1	G6AE1	G6AE1	G6AE1	28	28	28	28	101	101	101	101	93.2176	93.2176	92.8158	93.6194	MALE	MALE	MALE	MALE	0.171506	0.181139	0.258199	0.107702	74.333	68.7078	70.7168	60.6718	0.368898	0.378555	0.474609	0.479619	0.00230415	0.00252207	0.00352113	0.0026738	232.5	215	135	247.5
G6AE1	G6AE1	G6AE1	G6AE1	28	28	28	28	101	101	101	101	93.2176	93.6194	92.8158	93.6194	MALE	MALE	MALE	MALE	0.222855	0.124181	0.228082	0.130357	73.1276	69.9132	68.7078	67.9042	0.526098	0.494086	0.41895	0.479888	0.00299401	0.00323625	0.00311042	0.00323625	195	167.5	157.5	167.5
G6AE1	G6AE1	G6AE1	G6AE1	28	28	28	28	101	101	101	101	93.2176	93.6194	93.2176	93.6194	MALE	MALE	MALE	MALE	0.216376	0.124181	0.12625	0.138183	70.7168	67.9042	63.4844	66.6988	0.466778	0.488519	0.492127	0.560494	0.00290698	0.00323625	0.00176523	0.00343053	192.5	170	437.5	172.5
G6AE1	G6AE1	G6AE1	G6AE1	28	28	28	28	101	101	101	101	93.2176	93.6194	93.2176	93.6194	MALE	MALE	MALE	MALE	0.203093	0.136312	0.108119	0.100325	73.1276	51.8322	72.324	55.0466	0.452802	0.347867	0.421714	0.482865	0.00272851	0.0035524	0.00151172	0.00249066	205	132.5	490	287.5
G6AE1	G6AE1	G6AE1	G6AE1	28	28	28	28	101	101	101	101	93.6194	93.6194	93.2176	93.6194	MALE	MALE	MALE	MALE	0.113657	0.101245	0.173804	0.129311	73.5294	72.7258	72.324	27.7242	0.501907	0.574908	0.441	0.232976	0.00265604	0.00263852	0.00243013	0.00321027	230	252.5	247.5	192.5
G6AE1	G6AE1	G6AE1	G6AE1	28	28	28	28	101	101	101	101	93.6194	93.6194	93.2176	93.6194	MALE	MALE	MALE	MALE	0.144323	0.0593533	0.217387	0.186053	69.9132	46.6088	69.1096	18.4828	0.512185	0.4592	0.4214	0.288794	0.00337268	0.00154679	0.00303951	0.00461894	160	545	165	152.5
G6AE1	G6AE1	G6AE1	G6AE1	28	28	28	28	101	101	101	101	93.6194	93.6194	93.2176	93.6194	MALE	MALE	MALE	MALE	0.14555	0.0889268	0.207908	0.0776117	71.5204	38.171	67.5024	40.5818	0.576777	0.468356	0.417972	0.320805	0.00340136	0.0023175	0.00290698	0.00192678	170	350	182.5	392.5
G6AE1	G6AE1	G6AE1	G6AE1	28	28	28	28	101	101	101	101	93.6194	93.6194	93.2176	93.6194	MALE	MALE	MALE	MALE	0.107247	0.0926857	0.178133	0.124322	57.8592	29.7332	68.7078	40.18	0.4018	0.324953	0.349658	0.439126	0.00250627	0.00241546	0.00249066	0.00308642	255	322.5	205	232.5
G6AE1	G6AE1	G6AE1	G6AE1	28	29	28	28	101	102	101	101	93.6194	82.7708	93.6194	93.6194	MALE	MALE	MALE	MALE	0.182871	0.201578	0.0310031	0.0385828	34.153	65.4934	73.9312	32.144	0.419055	0.562175	0.513411	0.341957	0.0042735	0.00337268	0.00308642	0.000957854	152.5	180	180	950
G6AE1	G6AE1	G6AE1	G6AE1	28	29	28	29	101	102	101	102	93.6194	82.7708	93.6194	82.7708	MALE	MALE	MALE	MALE	0.191034	0.21045	0.0317378	0.185666	14.8666	51.8322	72.7258	63.4844	0.158155	0.464863	0.450315	0.522505	0.00446429	0.00352113	0.00315956	0.00315956	130	172.5	155	195
G6AE1	G6AE1	G6AE1	G6AE1	28	29	28	29	101	102	101	102	93.6194	82.7708	93.6194	82.7708	MALE	MALE	MALE	MALE	0.0797609	0.141798	0.038413	0.206913	42.5908	62.279	47.8142	61.4754	0.252017	0.425113	0.393533	0.442269	0.00186393	0.00237248	0.00382409	0.00352113	367.5	275	140	145
G6AE1	G6AE1	G6AE1	G6AE1	28	29	28	29	101	102	101	102	93.6194	82.7708	93.6194	82.7708	MALE	MALE	MALE	MALE	0.123497	0.146131	0.0943192	0.161437	44.198	52.6358	11.2504	48.216	0.446444	0.392804	0.190685	0.285302	0.002886	0.00244499	0.00938967	0.00274725	247.5	275	47.5	195
G6AE1	G6AE1	G6AE1	G6AE1	29	29	28	29	102	102	101	102	82.7708	82.7708	93.6194	82.7708	MALE	MALE	MALE	MALE	0.0603028	0.165333	0.0360036	0.148205	68.306	51.8322	57.8592	55.8502	0.519437	0.418002	0.507537	0.325657	0.00326264	0.00276625	0.00358423	0.00252207	175	237.5	165	225
G6AE1	G6AE1	G6AE1	G6AE1	29	29	28	29	102	102	101	102	82.7708	82.7708	93.6194	82.7708	MALE	MALE	MALE	MALE	0.0687093	0.151695	0.0157199	0.142803	60.6718	57.8592	51.0286	55.0466	0.532209	0.394943	0.297543	0.36944	0.00371747	0.00253807	0.00156495	0.00243013	155	247.5	467.5	262.5
G6AE1	G6AE1	G6AE1	G6AE1	29	29	28	29	102	102	101	102	82.7708	92.0122	93.6194	82.7708	MALE	MALE	MALE	MALE	0.0454681	0.245922	0.0228815	0.153029	63.4844	71.9222	42.5908	53.8412	0.307431	0.675326	0.419614	0.380503	0.00246002	0.00422833	0.0022779	0.00260417	200	130	337.5	242.5
G6AE1	G6AE1	G6AE1	G6AE1	29	29	28	29	102	102	101	102	82.7708	92.0122	93.6194	92.0122	MALE	MALE	MALE	MALE	0.0469107	0.231255	0.0322472	0.31388	59.0646	65.4934	31.7422	66.297	0.296807	0.53904	0.305213	0.594592	0.00253807	0.00397614	0.00321027	0.00422833	195	130	207.5	125
G6AE1	G6AE1	G6AE1	G6AE1	29	29	28	29	102	102	101	102	82.7708	92.0122	93.6194	92.0122	MALE	MALE	MALE	MALE	0.0481323	0.189757	0.0153593	0.270922	58.261	54.243	18.081	49.8232	0.391013	0.59282	0.182636	0.427667	0.00260417	0.00326264	0.00152905	0.00364964	235	215	555	157.5
G6AE1	G6AE1	G6AE1	G6AE1	29	29	29	29	102	102	102	102	82.7708	92.0122	82.7708	92.0122	MALE	MALE	MALE	MALE	0.047821	0.231255	0.169622	0.261382	59.0646	70.7168	69.9132	67.1006	0.383536	0.648778	0.469216	0.615602	0.00258732	0.00397614	0.00299401	0.00352113	232.5	142.5	185	175
G6AE1	G6AE1	G6AE1	G6AE1	29	29	29	29	102	102	102	102	82.7708	92.0122	82.7708	92.0122	MALE	MALE	MALE	MALE	0.0522113	0.224558	0.189478	0.292254	12.054	59.8682	70.315	63.0826	0.309077	0.562143	0.524739	0.592325	0.00282486	0.003861	0.00334448	0.00393701	315	152.5	165	147.5
G6AE1	G6AE1	G6AE1	G6AE1	29	29	29	29	102	102	102	102	82.7708	92.0122	82.7708	92.0122	MALE	MALE	MALE	MALE	0.0917261	0.17284	0.210609	0.286612	23.7062	52.234	46.6088	42.189	0.290874	0.514621	0.448162	0.448819	0.00496278	0.00297177	0.00371747	0.003861	120	235	165	165
G6AE1	G6AE1	G6AE1	G6AE1	29	29	29	29	102	102	102	102	92.0122	87.9942	82.7708	92.0122	MALE	MALE	MALE	MALE	0.28664	0.250857	0.135212	0.203936	71.1186	73.5294	65.8952	71.5204	0.637835	0.559159	0.421056	0.543881	0.0041841	0.0035524	0.00238663	0.00274725	127.5	150	262.5	232.5
G6AE1	G6AE1	G6AE1	G6AE1	29	29	29	29	102	102	102	102	92.0122	87.9942	82.7708	87.9942	MALE	MALE	MALE	MALE	0.223514	0.100307	0.127599	0.211895	54.243	60.6718	57.8592	60.27	0.370259	0.470324	0.327814	0.433597	0.00326264	0.00142045	0.00225225	0.00331675	160	575	267.5	162.5
G6AE1	G6AE1	G6AE1	G6AE1	29	29	29	29	102	102	102	102	92.0122	87.9942	82.7708	87.9942	MALE	MALE	MALE	MALE	0.264505	0.248649	0.14564	0.0901075	72.7258	61.8772	57.4574	65.8952	0.652249	0.542782	0.325538	0.501104	0.003861	0.00352113	0.00257069	0.00141044	147.5	170	212.5	577.5
G6AE1	G6AE1	G6AE1	G6AE1	29	29	29	29	102	102	102	102	92.0122	87.9942	82.7708	87.9942	MALE	MALE	MALE	MALE	0.269712	0.257724	0.165897	0.222988	66.297	66.297	48.216	64.288	0.569073	0.581553	0.346878	0.529119	0.00393701	0.00364964	0.00292826	0.0034904	137.5	160	202.5	165
G6AE1	G6AE1	G6AE1	G6AE1	29	29	29	29	102	102	102	102	92.0122	87.9942	92.0122	87.9942	MALE	MALE	MALE	MALE	0.213085	0.208308	0.252772	0.215468	53.8412	68.7078	70.7168	68.306	0.338624	0.477138	0.634231	0.450865	0.00311042	0.00294985	0.00409836	0.00337268	162.5	195	132.5	145
G6AE1	G6AE1	G6AE1	G6AE1	29	29	29	29	102	102	102	102	92.0122	93.2176	92.0122	87.9942	MALE	MALE	MALE	MALE	0.22912	0.337963	0.255388	0.185716	70.315	78.7528	59.4664	55.8502	0.545078	0.757238	0.521635	0.432947	0.00334448	0.0046729	0.00414079	0.00290698	170	110	127.5	215
G6AE1	G6AE1	G6AE1	G6AE1	29	29	29	29	102	102	102	102	87.9942	93.2176	92.0122	93.2176	MALE	MALE	MALE	MALE	0.247894	0.315825	0.191839	0.289582	79.1546	70.315	67.1006	73.5294	0.513991	0.676106	0.52016	0.742721	0.00389864	0.00436681	0.00311042	0.0041841	102.5	125	192.5	140
G6AE1	G6AE1	G6AE1	G6AE1	29	29	29	29	102	102	102	102	87.9942	93.2176	92.0122	93.2176	MALE	MALE	MALE	MALE	0.280728	0.279243	0.252772	0.305563	43.3944	59.0646	67.9042	77.9492	0.474256	0.70315	0.582869	0.683765	0.00441501	0.003861	0.00409836	0.00441501	135	175	127.5	112.5
G6AE1	G6AE1	G6AE1	G6AE1	29	29	29	29	102	102	102	102	87.9942	93.2176	92.0122	93.2176	MALE	MALE	MALE	MALE	0.147358	0.350237	0.250208	0.262159	28.9296	81.1636	56.252	49.0196	0.271639	0.7621	0.516073	0.507975	0.0023175	0.00484262	0.0040568	0.00378788	325	100	137.5	167.5
G6AE1	G6AE1	G6AE1	G6AE1	29	29	29	29	102	102	102	102	87.9942	93.2176	92.0122	93.2176	MALE	MALE	MALE	MALE	0.197776	0.263956	0.16602	0.319677	65.4934	68.306	67.5024	78.351	0.498049	0.68996	0.40542	0.811927	0.00311042	0.00364964	0.00269179	0.00461894	190	175	205	120
G6AE1	G6AE1	G6AE1	G6AE1	29	29	29	29	102	102	102	102	87.9942	87.1906	87.9942	93.2176	MALE	MALE	MALE	MALE	0.214451	0.133277	0.242304	0.292643	74.7348	49.4214	73.1276	64.288	0.547508	0.475206	0.556103	0.508206	0.00337268	0.00217865	0.00358423	0.00422833	160	355	147.5	110
G6AE1	G6AE1	G6AE1	G6AE1	29	29	29	29	102	102	102	102	87.9942	87.1906	87.9942	87.1906	MALE	MALE	MALE	MALE	0.205776	0.165783	0.0977626	0.151653	67.1006	54.243	56.6538	57.0556	0.45034	0.521567	0.42279	0.370491	0.00323625	0.00271003	0.00144613	0.00229095	160	265	557.5	282.5
G6AE1	G6AE1	G6AE1	G6AE1	29	29	29	29	102	102	102	102	87.9942	87.1906	87.9942	87.1906	MALE	MALE	MALE	MALE	0.187566	0.169223	0.213595	0.186996	61.0736	25.3134	69.1096	50.6268	0.390247	0.320423	0.471738	0.370892	0.00294985	0.00276625	0.00315956	0.00282486	182.5	282.5	170	217.5
G6AE1	G6AE1	G6AE1	G6AE1	29	29	29	29	102	102	102	102	93.2176	87.1906	87.9942	87.1906	MALE	MALE	MALE	MALE	0.299062	0.137008	0.228003	0.130694	86.387	65.8952	71.5204	41.7872	0.774771	0.46569	0.449814	0.422093	0.00414079	0.00223964	0.00337268	0.00197433	130	305	137.5	407.5
G6AE1	G6AE1	G6AE1	G6AE1	29	29	29	29	102	102	102	102	93.2176	87.1906	87.9942	87.1906	MALE	MALE	MALE	MALE	0.329788	0.180454	0.220564	0.193841	79.1546	73.5294	58.261	65.0916	0.694339	0.548727	0.384561	0.444311	0.00456621	0.00294985	0.00326264	0.00292826	105	205	155	195
G6AE1	G6AE1	G6AE1	G6AE1	29	29	29	29	102	102	102	102	93.2176	87.1906	93.2176	87.1906	MALE	MALE	MALE	MALE	0.315387	0.221244	0.325159	0.210817	46.6088	67.9042	85.5834	61.8772	0.571887	0.609006	0.676549	0.489148	0.00436681	0.00361664	0.00451467	0.00318471	147.5	165	95	187.5
G6AE1	G6AE1	G6AE1	G6AE1	29	29	29	29	102	102	102	102	93.2176	87.1906	93.2176	87.1906	MALE	MALE	MALE	MALE	0.299062	0.165783	0.40806	0.221393	85.1816	55.8502	51.0286	61.4754	0.799827	0.4018	0.713687	0.405778	0.00414079	0.00271003	0.00566572	0.00334448	135	230	105	147.5
G6AE1	G6AE1	G6AE1	G6AE1	29	29	29	29	102	102	102	102	93.2176	87.9942	93.2176	87.9942	MALE	MALE	MALE	MALE	0.292996	0.0778529	0.233083	0.0554912	67.1006	33.7512	80.7618	29.3314	0.491579	0.368866	0.614158	0.107049	0.0040568	0.00164204	0.00323625	0.00156495	110	517.5	177.5	365
G6AE1	G6AE1	G6AE1	G6AE1	29	29	29	29	102	102	102	102	87.1906	87.9942	93.2176	87.9942	MALE	MALE	MALE	MALE	0.166992	0.0883735	0.396819	0.0851353	30.9386	41.7872	71.5204	33.7512	0.239834	0.343928	0.722428	0.247262	0.00253807	0.00186393	0.00550964	0.00240096	265	415	82.5	280
G6AE1	G6AE1	G6AE1	G6AE1	29	29	29	29	102	102	102	102	87.1906	87.9942	93.2176	87.9942	MALE	MALE	MALE	MALE	0.530603	0.0892049	0.26048	0.0894296	14.8666	39.7782	72.324	35.7602	0.207924	0.423172	0.648646	0.380428	0.00806452	0.00188147	0.00361664	0.00252207	52.5	437.5	165	302.5
G6AE1	G6AE1	G6AE1	G6AE1	29	29	29	29	102	102	102	102	87.1906	87.9942	87.1906	87.9942	MALE	MALE	MALE	MALE	0.177106	0.133933	0.122914	0.0620452	57.0556	41.3854	55.8502	46.6088	0.310085	0.478444	0.416793	0.335315	0.00269179	0.00282486	0.0021097	0.00174978	187.5	267.5	340	432.5
G6AE1	G6AE1	G6AE1	G6AE1	29	29	29	29	102	102	102	102	87.1906	87.9942	87.1906	87.9942	MALE	MALE	MALE	MALE	0.235823	0.115923	0.155778	0.103833	36.5638	32.9476	57.8592	31.7422	0.360234	0.417058	0.431785	0.328935	0.00358423	0.00244499	0.0026738	0.00292826	177.5	330	240	245
G6AE1	G6AE1	G6AE1	G6AE1	29	29	29	29	102	102	102	102	87.1906	87.9942	87.1906	87.9942	MALE	MALE	MALE	MALE	0.115632	0.138836	0.174434	0.0899971	69.1096	26.117	16.4738	38.171	0.456169	0.352932	0.3362	0.385566	0.00175747	0.00292826	0.00299401	0.00253807	417.5	267.5	285	295
G6AE1	G6AE1	G6AE1	G6AE1	29	29	29	29	102	102	102	102	87.1906	87.9942	87.1906	87.9942	MALE	MALE	MALE	MALE	0.199984	0.0844388	0.316636	0.0575164	65.8952	55.4484	19.2864	22.5008	0.434952	0.475952	0.2296	0.276083	0.00303951	0.00178094	0.00543478	0.00162206	177.5	445	100	535
G6AE1	G6AE1	G6AE1	G6AE1	29	29	29	29	102	102	102	102	87.1906	87.9942	87.1906	87.9942	MALE	MALE	MALE	MALE	0.218225	0.148628	0.169363	0.129412	70.7168	38.171	66.6988	61.0736	0.466778	0.428888	0.383326	0.464438	0.00331675	0.0031348	0.00290698	0.00364964	150	230	170	142.5
G6AE1	G6AE1	G6AE1	G6AE1	29	29	29	29	102	102	102	102	87.1906	87.9942	87.1906	87.9942	MALE	MALE	MALE	MALE	0.231672	0.121104	0.201595	0.0888693	61.4754	33.7512	62.6808	36.162	0.426912	0.4018	0.485898	0.356276	0.00352113	0.00255428	0.00346021	0.00250627	140	307.5	160	297.5
G6AE1	G6AE1	G6AE1	G6AE1	29	29	29	29	102	102	102	102	87.9942	87.9942	87.1906	87.9942	MALE	MALE	MALE	MALE	0.103678	0.0995014	0.194853	0.0917435	32.144	43.3944	70.7168	28.9296	0.215732	0.364659	0.499765	0.378165	0.00189036	0.00209864	0.00334448	0.00258732	380	357.5	157.5	310
G6AE1	G6AE1	G6AE1	G6AE1	29	29	29	29	102	102	102	102	87.9942	85.1816	87.1906	85.1816	MALE	MALE	MALE	MALE	0.107225	0.210198	0.174434	0.188627	46.6088	53.8412	51.8322	51.4304	0.223009	0.452447	0.353803	0.376779	0.00195503	0.00280505	0.00299401	0.00265604	302.5	237.5	187.5	240
G6AE1	G6AE1	G6AE1	G6AE1	29	29	29	29	102	102	102	102	87.9942	85.1816	87.9942	85.1816	MALE	MALE	MALE	MALE	0.142827	0.187809	0.0768775	0.179113	40.5818	56.252	45.4034	47.8142	0.483117	0.493439	0.285556	0.377978	0.00260417	0.00250627	0.00163532	0.00252207	300	285	452.5	270
G6AE1	G6AE1	G6AE1	G6AE1	29	29	29	29	102	102	102	102	87.9942	85.1816	87.9942	85.1816	MALE	MALE	MALE	MALE	0.0900586	0.186639	0.0872182	0.196454	45.4034	51.4304	47.8142	55.8502	0.27685	0.441463	0.249683	0.387849	0.00164204	0.00249066	0.00185529	0.00276625	445	285	347.5	217.5
G6AE1	G6AE1	G6AE1	G6AE1	29	29	29	29	102	102	102	102	87.9942	85.1816	87.9942	85.1816	MALE	MALE	MALE	MALE	0.143763	0.229512	0.0833521	0.180249	37.7692	66.297	41.7872	57.8592	0.205267	0.534653	0.275823	0.457385	0.00262123	0.00306279	0.00177305	0.00253807	197.5	202.5	412.5	267.5
G6AE1	G6AE1	G6AE1	G6AE1	29	29	29	29	102	102	102	102	87.9942	85.1816	87.9942	85.1816	MALE	MALE	MALE	MALE	0.150675	0.254883	0.14075	0.237519	39.3764	62.6808	39.3764	63.8862	0.278278	0.538033	0.378619	0.505029	0.00274725	0.00340136	0.00299401	0.00334448	222.5	177.5	230	172.5
G6AE1	G6AE1	G6AE1	G6AE1	29	29	29	29	102	102	102	102	87.9942	85.1816	87.9942	85.1816	MALE	MALE	MALE	MALE	0.17607	0.244488	0.117087	0.235549	13.2594	73.1276	36.5638	63.8862	0.179181	0.556103	0.28344	0.515211	0.00321027	0.00326264	0.00249066	0.00331675	237.5	175	272.5	177.5
G6AE1	G6AE1	G6AE1	G6AE1	29	29	29	29	102	102	102	102	87.9942	84.378	87.9942	84.378	MALE	MALE	MALE	MALE	0.177494	0.0750062	0.153379	0.12059	29.7332	56.252	24.5098	44.5998	0.175936	0.528188	0.368568	0.399998	0.00323625	0.00263852	0.00326264	0.00249066	140	272.5	240	290
G6AE1	G6AE1	G6AE1	G6AE1	29	29	29	29	102	102	102	102	87.9942	84.378	87.9942	84.378	MALE	MALE	MALE	MALE	0.239501	0.0770389	0.576817	0.144961	45.8052	48.216	7.2324	40.5818	0.430096	0.512936	0.198148	0.348342	0.00436681	0.00271003	0.0122699	0.00299401	122.5	275	45	217.5
G6AE1	G6AE1	G6AE1	G6AE1	29	29	29	29	102	102	102	102	87.9942	84.378	87.9942	84.378	MALE	MALE	MALE	MALE	0.130897	0.0966917	0.0905792	0.161929	36.9656	26.9206	57.4574	47.4124	0.26594	0.420634	0.4729	0.467117	0.00238663	0.00340136	0.00192678	0.00334448	280	230	397.5	197.5
G6AE1	G6AE1	G6AE1	G6AE1	29	29	29	29	102	102	102	102	87.9942	84.378	87.9942	84.378	MALE	MALE	MALE	MALE	0.161787	0.0377021	0.125697	0.0607871	28.5278	58.6628	43.3944	34.9566	0.250244	0.607905	0.232678	0.353097	0.00294985	0.00132626	0.0026738	0.00125549	225	657.5	187.5	697.5
G6AE1	G6AE1	G6AE1	G6AE1	29	29	29	29	102	102	102	102	87.9942	84.378	87.9942	84.378	MALE	MALE	MALE	MALE	0.503172	0.0666526	0.167	0.170482	11.6522	28.126	26.9206	43.3944	0.182066	0.264094	0.456281	0.306674	0.00917431	0.00234467	0.0035524	0.00352113	45	320	222.5	142.5
G6AE1	G6AE1	G6AE1	G6AE1	29	29	29	29	102	102	102	102	87.9942	84.378	87.9942	84.378	MALE	MALE	MALE	MALE	0.161787	0.0716957	0.614518	0.0919599	61.4754	69.1096	8.036	48.6178	0.5166	0.525548	0.193639	0.467479	0.00294985	0.00252207	0.0130719	0.00189934	220	265	35	422.5
G6AE1	G6AE1	G6AE1	G6AE1	29	29	29	29	102	102	102	102	85.1816	84.378	87.9942	84.378	MALE	MALE	MALE	MALE	0.186086	0.104705	0.0981432	0.170482	59.4664	40.18	55.8502	49.8232	0.420257	0.439126	0.287888	0.457094	0.00258732	0.00368324	0.00208768	0.00352113	245	180	285	175
G6AE1	G6AE1	G6AE1	G6AE1	29	29	29	29	102	102	102	102	85.1816	84.378	85.1816	84.378	MALE	MALE	MALE	MALE	0.175849	0.0851118	0.213656	0.152976	58.261	24.5098	48.6178	34.153	0.35525	0.342794	0.362819	0.383742	0.00244499	0.00299401	0.002886	0.00315956	245	262.5	212.5	227.5
G6AE1	G6AE1	G6AE1	G6AE1	29	29	29	29	102	102	102	102	85.1816	83.1726	85.1816	84.378	MALE	MALE	MALE	MALE	0.207568	0.111527	0.174603	0.0832621	53.4394	50.6268	64.288	45.8052	0.406383	0.434565	0.374857	0.462679	0.002886	0.00250627	0.00235849	0.00171969	215	282.5	252.5	482.5
G6AE1	G6AE1	G6AE1	G6AE1	29	29	29	29	102	102	102	102	85.1816	83.1726	85.1816	83.1726	MALE	MALE	MALE	MALE	0.17693	0.141718	0.183247	0.162481	69.1096	58.261	59.4664	40.2739	0.463823	0.451636	0.306528	0.353279	0.00246002	0.00318471	0.00247525	0.00265604	257.5	185	210	262.5
G6AE1	G6AE1	G6AE1	G6AE1	29	29	29	29	102	102	102	102	85.1816	83.1726	85.1816	83.1726	MALE	MALE	MALE	MALE	0.240542	0.151358	0.216784	0.199589	66.6988	70.315	69.5114	53.0376	0.527263	0.603562	0.430411	0.486583	0.00334448	0.00340136	0.00292826	0.00326264	172.5	177.5	180	197.5
G6AE1	G6AE1	G6AE1	G6AE1	29	29	29	29	102	102	102	102	85.1816	83.1726	85.1816	83.1726	MALE	MALE	MALE	MALE	0.227242	0.17017	0.251808	0.185939	75.1366	60.6718	66.297	59.4664	0.512878	0.509847	0.452539	0.479568	0.00315956	0.00382409	0.00340136	0.00303951	170	142.5	147.5	205
G6AE1	G6AE1	G6AE1	G6AE1	29	29	29	29	102	102	102	102	84.378	83.1726	85.1816	83.1726	MALE	MALE	MALE	MALE	0.118513	0.0829438	0.2584	0.23172	44.198	38.9746	69.9132	69.5114	0.34262	0.414623	0.494086	0.538848	0.00258732	0.00186393	0.0034904	0.00378788	257.5	442.5	145	135
G6AE1	G6AE1	G6AE1	G6AE1	29	29	29	29	102	102	102	102	84.378	83.1726	84.378	83.1726	MALE	MALE	MALE	MALE	0.12498	0.139496	0.0290915	0.238495	50.6268	66.6988	55.4484	35.7602	0.299567	0.598196	0.285816	0.4018	0.00272851	0.0031348	0.00209864	0.00389864	197.5	207.5	282.5	167.5
G6AE1	G6AE1	G6AE1	G6AE1	29	29	29	29	102	102	102	102	84.378	83.1726	84.378	83.1726	MALE	MALE	MALE	MALE	0.187726	0.147593	0.0452271	0.104304	38.9746	40.18	40.18	58.261	0.450573	0.493006	0.395862	0.426821	0.00409836	0.00331675	0.00326264	0.00170503	157.5	220	205	450
G6AE1	G6AE1	G6AE1	G6AE1	29	29	29	29	102	102	102	102	84.378	78.351	84.378	83.1726	MALE	MALE	MALE	MALE	0.0569716	0.218028	0.0383461	0.208075	50.225	71.9222	53.8412	53.0376	0.301652	0.617358	0.452447	0.411144	0.00124378	0.0035524	0.00276625	0.00340136	637.5	165	242.5	165
G6AE1	G6AE1	G6AE1	G6AE1	29	29	29	29	102	102	102	102	84.378	78.351	84.378	78.351	MALE	MALE	MALE	MALE	0.195749	0.221971	0.0467524	0.214113	42.189	73.5294	25.7152	65.8952	0.517656	0.569995	0.23063	0.46569	0.0042735	0.00361664	0.00337268	0.00337268	152.5	147.5	185	155
G6AE1	G6AE1	G6AE1	G6AE1	29	29	29	29	102	102	102	102	84.378	78.351	84.378	78.351	MALE	MALE	MALE	MALE	0.0767899	0.254141	0.0354077	0.236001	62.279	42.9926	11.6522	71.5204	0.411083	0.497024	0.168872	0.505445	0.00167645	0.00414079	0.00255428	0.00371747	445	155	322.5	127.5
G6AE1	G6AE1	G6AE1	G6AE1	29	29	29	29	102	102	102	102	84.378	78.351	84.378	78.351	MALE	MALE	MALE	MALE	0.171877	0.145611	0.035183	0.227543	45.4034	21.2954	71.1186	67.5024	0.407205	0.346267	0.477306	0.477049	0.00375235	0.00237248	0.00253807	0.00358423	155	360	245	137.5
G6AE1	G6AE1	G6AE1	G6AE1	29	29	29	29	102	102	102	102	84.378	78.351	84.378	78.351	MALE	MALE	MALE	MALE	0.137141	0.0949342	0.0280609	0.0941905	33.3494	46.207	32.144	30.135	0.231593	0.365273	0.182119	0.276468	0.00299401	0.00154679	0.00202429	0.00148368	190	520	317.5	565
G6AE1	G6AE1	G6AE1	G6AE1	29	29	29	29	102	102	102	102	84.378	78.351	84.378	78.351	MALE	MALE	MALE	MALE	0.0805012	0.109794	0.0459771	0.2296	60.27	57.0556	56.252	12.8576	0.458327	0.3479	0.472706	0.173751	0.00175747	0.00178891	0.00331675	0.00361664	437.5	395	182.5	202.5
G6AE1	G6AE1	G6AE1	G6AE1	29	29	29	29	102	102	102	102	83.1726	78.351	84.378	78.351	MALE	MALE	MALE	MALE	0.170187	0.14648	0.0445011	0.121153	37.7692	57.8592	42.189	46.6088	0.346506	0.416253	0.303518	0.215283	0.00280505	0.00238663	0.00321027	0.0019084	247.5	280	172.5	307.5
G6AE1	G6AE1	G6AE1	G6AE1	29	29	29	29	102	102	102	102	83.1726	91.2086	84.378	78.351	MALE	MALE	MALE	MALE	0.178973	0.578221	0.0501342	0.128511	66.6988	16.4738	12.8576	54.243	0.527263	0.396959	0.227568	0.325784	0.00294985	0.00840336	0.00361664	0.00202429	212.5	77.5	220	327.5
G6AE1	G6AE1	G6AE1	G6AE1	29	29	29	29	102	102	102	102	83.1726	91.2086	84.378	91.2086	MALE	MALE	MALE	MALE	0.175099	0.413263	0.0434549	0.253517	70.315	23.7062	24.5098	50.225	0.496926	0.439004	0.201727	0.597917	0.002886	0.00600601	0.0031348	0.00340136	205	112.5	197.5	210
G6AE1	G6AE1	G6AE1	G6AE1	29	29	29	29	102	102	102	102	83.1726	91.2086	83.1726	91.2086	MALE	MALE	MALE	MALE	0.238865	0.182758	0.125236	0.293441	71.9222	58.6628	52.234	66.6988	0.568555	0.446105	0.382667	0.749425	0.00393701	0.00265604	0.002886	0.00393701	127.5	245	210	165
G6AE1	G6AE1	G6AE1	G6AE1	29	29	29	29	102	102	102	102	83.1726	91.2086	83.1726	91.2086	MALE	MALE	MALE	MALE	0.199578	0.333212	0.130903	0.399646	34.153	74.333	63.0826	78.351	0.281095	0.835202	0.357408	0.791424	0.00328947	0.00484262	0.00301659	0.00536193	182.5	117.5	155	87.5
G6AE1	G6AE1	G6AE1	G6AE1	29	29	29	29	102	102	102	102	83.1726	91.2086	83.1726	91.2086	MALE	MALE	MALE	MALE	0.1057	0.354682	0.154154	0.344267	74.333	79.5564	71.5204	76.342	0.398568	0.764965	0.533734	0.669667	0.00174216	0.00515464	0.0035524	0.00461894	387.5	90	147.5	102.5
G6AE1	G6AE1	G6AE1	G6AE1	29	29	29	29	102	102	102	102	83.1726	91.2086	83.1726	91.2086	MALE	MALE	MALE	MALE	0.204627	0.321534	0.183486	0.379307	50.6268	78.351	47.8142	69.5114	0.328745	0.833521	0.44896	0.720325	0.00337268	0.0046729	0.00422833	0.00508906	142.5	120	130	100
G6AE1	G6AE1	G6AE1	G6AE1	29	29	29	28	102	102	102	98	78.351	91.2086	83.1726	90.8068	MALE	MALE	MALE	MALE	0.206414	0.333212	0.119215	0.216376	73.9312	66.297	19.2864	63.8862	0.472404	0.687016	0.279513	0.436083	0.00343053	0.00484262	0.00274725	0.00290698	135	110	295	197.5
G6AE1	G6AE1	G6AE1	G6AE1	29	28	29	28	102	98	102	98	78.351	90.8068	83.1726	90.8068	MALE	MALE	MALE	MALE	0.221619	0.203301	0.202778	0.207336	75.9402	63.8862	26.9206	59.4664	0.509666	0.451493	0.258852	0.585876	0.00368324	0.00265604	0.0046729	0.00278552	122.5	235	110	257.5
G6AE1	G6AE1	G6AE1	G6AE1	29	28	29	28	102	98	102	98	78.351	90.8068	83.1726	90.8068	MALE	MALE	MALE	MALE	0.221619	0.239946	0.133933	0.235177	70.7168	64.6898	65.8952	66.297	0.508754	0.543612	0.457606	0.569073	0.00368324	0.0031348	0.00308642	0.00315956	132.5	200	180	200
G6AE1	G6AE1	G6AE1	G6AE1	29	28	29	28	102	98	102	98	78.351	90.8068	83.1726	90.8068	MALE	MALE	MALE	MALE	0.0906168	0.251786	0.150154	0.269199	28.5278	71.5204	23.7062	73.1276	0.267867	0.601012	0.320354	0.578084	0.00150602	0.00328947	0.00346021	0.00361664	557.5	185	215	150
G6AE1	G6AE1	G6AE1	G6AE1	29	28	29	28	102	98	102	98	78.351	90.8068	78.351	90.8068	MALE	MALE	MALE	MALE	0.244096	0.26035	0.205564	0.233334	10.4468	72.7258	69.1096	69.1096	0.2132	0.523207	0.515743	0.580753	0.0040568	0.00340136	0.00331675	0.0031348	197.5	155	167.5	200
G6AE1	G6AE1	G6AE1	G6AE1	29	28	29	28	102	98	102	98	78.351	93.6194	78.351	93.6194	MALE	MALE	MALE	MALE	0.147114	0.236659	0.214456	0.169692	30.5368	70.315	75.5384	65.0916	0.267867	0.471913	0.543442	0.504586	0.00244499	0.00323625	0.00346021	0.00323625	295	160	150	180
G6AE1	G6AE1	G6AE1	G6AE1	29	28	29	28	102	98	102	98	78.351	93.6194	78.351	93.6194	MALE	MALE	MALE	MALE	0.306206	0.264476	0.228279	0.175368	15.6702	73.1276	71.9222	70.315	0.192272	0.556103	0.517426	0.578724	0.00508906	0.00361664	0.00368324	0.00334448	115	145	132.5	177.5
G6AE1	G6AE1	G6AE1	G6AE1	29	28	29	28	102	98	102	98	78.351	93.6194	78.351	93.6194	MALE	MALE	MALE	MALE	0.134758	0.244574	0.283003	0.176846	62.279	73.1276	37.3674	73.5294	0.301593	0.516803	0.473005	0.493486	0.00223964	0.00334448	0.00456621	0.00337268	240	157.5	140	147.5
G6AE1	G6AE1	G6AE1	G6AE1	29	28	29	28	102	98	102	98	91.2086	93.6194	78.351	93.6194	MALE	MALE	MALE	MALE	0.233147	0.215716	0.14038	0.171076	62.6808	68.306	22.9026	66.6988	0.649542	0.450865	0.170915	0.47137	0.00321027	0.00294985	0.00226501	0.00326264	215	187.5	307.5	165
G6AE1	G6AE1	G6AE1	G6AE1	29	28	29	28	102	98	102	98	91.2086	93.6194	78.351	93.6194	MALE	MALE	MALE	MALE	0.265056	0.183277	0.0958664	0.131416	73.9312	71.5204	52.6358	64.6898	0.766126	0.4361	0.294055	0.37178	0.00364964	0.00250627	0.00154679	0.00250627	177.5	235	467.5	225
G6AE1	G6AE1	G6AE1	G6AE1	29	28	29	28	102	98	102	98	91.2086	94.423	78.351	93.6194	MALE	MALE	MALE	MALE	0.379245	0.315001	0.111873	0.183019	81.9672	78.351	57.0556	28.126	0.788146	0.584709	0.29794	0.36766	0.00522193	0.0040568	0.00180505	0.0034904	87.5	112.5	362.5	210
G6AE1	G6AE1	G6AE1	G6AE1	29	28	29	28	102	98	102	98	91.2086	94.423	78.351	94.423	MALE	MALE	MALE	MALE	0.339371	0.3057	0.141988	0.280836	79.5564	40.9836	58.261	75.5384	0.697863	0.413976	0.330091	0.563719	0.0046729	0.00393701	0.00229095	0.00352113	100	155	260	150
G6AE1	G6AE1	G6AE1	G6AE1	29	28	29	28	102	98	102	98	91.2086	94.423	91.2086	94.423	MALE	MALE	MALE	MALE	0.394703	0.0893531	0.253552	0.0965001	66.297	52.6358	46.6088	27.3224	0.724557	0.575255	0.361309	0.426913	0.00543478	0.00115075	0.00371747	0.00120992	92.5	777.5	140	762.5
G6AE1	G6AE1	G6AE1	G6AE1	28	28	29	28	98	98	102	98	90.8068	94.423	91.2086	94.423	MALE	MALE	MALE	MALE	0.198159	0.294121	0.236005	0.27361	67.5024	75.5384	69.9132	67.5024	0.3936	0.648398	0.485508	0.57942	0.00272851	0.00378788	0.00346021	0.00343053	195	147.5	145	175
G6AE1	G6AE1	G6AE1	G6AE1	28	28	29	28	98	98	102	98	90.8068	94.423	91.2086	94.423	MALE	MALE	MALE	MALE	0.202299	0.311839	0.315037	0.32031	71.5204	75.1366	85.1816	73.1276	0.488194	0.60594	0.763961	0.627705	0.00278552	0.00401606	0.00461894	0.00401606	212.5	125	105	132.5
G6AE1	G6AE1	G6AE1	G6AE1	28	28	29	28	98	98	102	98	90.8068	94.423	91.2086	94.423	MALE	MALE	MALE	MALE	0.222436	0.283386	0.334341	0.299277	72.7258	75.1366	79.5564	75.1366	0.457395	0.560721	0.668541	0.60594	0.00306279	0.00364964	0.00490196	0.00375235	167.5	140	85	142.5
G6AE1	G6AE1	G6AE1	G6AE1	28	28	29	28	98	98	102	98	90.8068	92.0122	91.2086	92.0122	MALE	MALE	MALE	MALE	0.260306	0.155866	0.360876	0.190041	78.7528	56.6538	72.324	48.216	0.537562	0.415046	0.812629	0.499648	0.00358423	0.00249066	0.00529101	0.00284495	132.5	265	100	255
G6AE1	G6AE1	G6AE1	G6AE1	28	28	29	28	98	98	102	98	90.8068	92.0122	91.2086	92.0122	MALE	MALE	MALE	MALE	0.24088	0.220353	0.338489	0.237298	71.1186	55.8502	65.0916	61.0736	0.511645	0.564143	0.692464	0.502663	0.00331675	0.00352113	0.00496278	0.0035524	162.5	185	107.5	160
G6AE1	G6AE1	G6AE1	G6AE1	28	28	28	28	98	98	98	98	93.6194	92.0122	90.8068	92.0122	MALE	MALE	MALE	MALE	0.165632	0.228395	0.208012	0.255446	75.1366	61.0736	55.4484	58.261	0.504272	0.616905	0.413794	0.534505	0.0031348	0.00364964	0.00294985	0.00382409	170	175	205	152.5
G6AE1	G6AE1	G6AE1	G6AE1	28	28	28	28	98	98	98	98	93.6194	92.0122	90.8068	92.0122	MALE	MALE	MALE	MALE	0.173805	0.239313	0.206489	0.243793	75.5384	59.0646	68.7078	56.252	0.524572	0.529727	0.494301	0.568202	0.00328947	0.00382409	0.00292826	0.00364964	160	150	202.5	175
G6AE1	G6AE1	G6AE1	G6AE1	28	28	28	28	98	98	98	98	93.6194	92.0122	90.8068	92.0122	MALE	MALE	MALE	MALE	0.179717	0.237047	0.217642	0.243793	78.351	59.4664	77.1456	62.279	0.470577	0.55837	0.555004	0.558556	0.00340136	0.00378788	0.00308642	0.00364964	127.5	157.5	185	162.5
G6AE1	G6AE1	G6AE1	G6AE1	28	28	28	28	98	98	98	98	93.6194	92.0122	90.8068	92.0122	MALE	MALE	MALE	MALE	0.172387	0.197726	0.244	0.221556	69.9132	69.5114	72.324	59.4664	0.432899	0.474481	0.469636	0.545563	0.00326264	0.00315956	0.00346021	0.00331675	145	170	135	192.5
G6AE1	G6AE1	G6AE1	G6AE1	28	28	28	28	98	98	98	98	93.6194	92.0122	90.8068	98.441	MALE	MALE	MALE	MALE	0.132423	0.22633	0.23196	0.176627	72.324	58.261	65.8952	55.4484	0.363437	0.547052	0.482749	0.406215	0.00250627	0.00361664	0.00328947	0.00257069	200	170	167.5	252.5
G6AE1	G6AE1	G6AE1	G6AE1	28	28	28	28	98	98	98	98	93.6194	98.441	93.6194	98.441	MALE	MALE	MALE	MALE	0.179717	0.16754	0.234238	0.170069	34.9566	55.4484	81.5654	49.0196	0.362245	0.486389	0.51299	0.420769	0.00340136	0.00246002	0.002886	0.00247525	197.5	292.5	187.5	287.5
G6AE1	G6AE1	G6AE1	G6AE1	28	28	28	28	98	98	98	98	94.423	98.441	93.6194	98.441	MALE	MALE	MALE	MALE	0.276435	0.179697	0.262665	0.1722	69.5114	38.171	73.1276	61.7681	0.596664	0.441283	0.459922	0.444375	0.00393701	0.00263852	0.00323625	0.00250627	137.5	292.5	150	260
G6AE1	G6AE1	G6AE1	G6AE1	28	28	28	28	98	98	98	98	94.423	98.441	93.6194	98.441	MALE	MALE	MALE	MALE	0.0836884	0.159684	0.283294	0.183711	25.7152	73.9312	77.9492	51.0286	0.266479	0.487995	0.523149	0.419988	0.0011919	0.00234467	0.0034904	0.0026738	742.5	275	137.5	252.5
G6AE1	G6AE1	G6AE1	G6AE1	28	28	28	28	98	98	98	98	94.423	98.441	93.6194	98.441	MALE	MALE	MALE	MALE	0.234831	0.182099	0.27145	0.163008	78.351	55.8502	70.7168	52.6358	0.607372	0.500899	0.466778	0.408029	0.00334448	0.0026738	0.00334448	0.00237248	170	262.5	147.5	292.5
G6AE1	G6AE1	G6AE1	G6AE1	28	28	28	28	98	98	98	98	94.423	98.441	93.6194	98.441	MALE	MALE	MALE	MALE	0.279183	0.165504	0.283294	0.139792	79.1546	56.252	56.6538	63.4844	0.625728	0.404691	0.456885	0.42607	0.00397614	0.00243013	0.0034904	0.00203459	125	272.5	162.5	342.5
G6AE1	G6AE1	G6AE1	G6AE1	28	28	28	28	98	98	98	98	94.423	98.441	93.6194	94.423	MALE	MALE	MALE	MALE	0.263469	0.13999	0.177795	0.232603	79.5564	61.8772	69.1096	63.0826	0.604992	0.389165	0.397182	0.508731	0.00375235	0.0020555	0.00219058	0.00343053	135	327.5	282.5	167.5
G6AE1	G6AE1	G6AE1	G6AE1	28	28	28	28	98	98	98	98	94.423	98.441	94.423	94.423	MALE	MALE	MALE	MALE	0.223613	0.156924	0.268342	0.230625	66.6988	62.279	79.9582	67.5024	0.412996	0.432493	0.555265	0.567247	0.00318471	0.00230415	0.0035524	0.00340136	152.5	290	137.5	175
G6AE1	G6AE1	G6AE1	G6AE1	28	28	28	28	98	98	98	98	92.0122	94.423	94.423	94.423	MALE	MALE	MALE	MALE	0.19935	0.221586	0.341031	0.266944	54.6448	63.0826	44.198	71.5204	0.407797	0.621503	0.526167	0.588645	0.00308642	0.0034904	0.00451467	0.00393701	190	185	137.5	132.5
G6AE1	G6AE1	G6AE1	G6AE1	28	28	28	28	98	98	98	98	92.0122	94.423	94.423	94.423	MALE	MALE	MALE	MALE	0.167113	0.2296	0.0833297	0.252059	61.8772	73.1276	73.9312	63.0826	0.470549	0.670895	0.496183	0.508731	0.00258732	0.00361664	0.00110314	0.00371747	255	167.5	757.5	145
G6AE1	G6AE1	G6AE1	G6AE1	28	28	28	28	98	98	98	98	92.0122	94.423	94.423	94.423	MALE	MALE	MALE	MALE	0.229447	0.245114	0.300351	0.188868	62.6808	69.5114	77.5474	59.8682	0.4955	0.596664	0.625382	0.415751	0.0035524	0.003861	0.00397614	0.00278552	155	142.5	127.5	215
G6AE1	G6AE1	G6AE1	G6AE1	28	28	28	28	98	98	98	98	92.0122	94.423	94.423	94.423	MALE	MALE	MALE	MALE	0.246996	0.20218	0.280812	0.145346	63.8862	69.1096	79.5564	59.8682	0.525812	0.515743	0.543047	0.464095	0.00382409	0.00318471	0.00371747	0.00214362	140	180	122.5	337.5
G6AE1	G6AE1	G6AE1	G6AE1	28	28	28	28	98	98	98	98	92.0122	94.423	94.423	92.414	MALE	MALE	MALE	MALE	0.225443	0.14544	0.300351	0.23513	67.5024	57.0556	70.7168	71.5204	0.503749	0.353285	0.548192	0.565379	0.0034904	0.00229095	0.00397614	0.00318471	152.5	275	122.5	187.5
G6AE1	G6AE1	G6AE1	G6AE1	28	28	28	28	98	98	98	98	92.0122	92.414	92.0122	92.414	MALE	MALE	MALE	MALE	0.233596	0.274221	0.1984	0.253279	66.6988	71.9222	41.7872	66.6988	0.497752	0.604388	0.483089	0.497752	0.00361664	0.00364964	0.00311042	0.00343053	142.5	155	235	157.5
G6AE1	G6AE1	G6AE1	G6AE1	28	28	28	28	98	98	98	98	92.0122	92.414	92.0122	92.414	MALE	MALE	MALE	MALE	0.225443	0.231903	0.1683	0.23513	62.6808	71.5204	65.0916	72.7258	0.538033	0.554422	0.476862	0.586498	0.0034904	0.00308642	0.00263852	0.00318471	170	195	242.5	190
G6AE1	G6AE1	G6AE1	G6AE1	28	28	28	28	98	98	98	98	98.441	92.414	92.0122	92.414	MALE	MALE	MALE	MALE	0.179413	0.295813	0.228623	0.165354	54.243	45.4034	61.0736	54.243	0.390237	0.510151	0.492529	0.33587	0.0026738	0.00393701	0.00358423	0.00223964	235	165	155	285
G6AE1	G6AE1	G6AE1	G6AE1	28	28	28	28	98	98	98	98	98.441	92.414	92.0122	92.414	MALE	MALE	MALE	MALE	0.153724	0.1394	0.27854	0.213076	57.0556	67.5024	55.4484	65.4934	0.410472	0.477049	0.589877	0.629744	0.00229095	0.00185529	0.00436681	0.002886	297.5	397.5	135	242.5
G6AE1	G6AE1	G6AE1	G6AE1	28	28	28	28	98	98	98	98	98.441	92.414	92.0122	93.6194	MALE	MALE	MALE	MALE	0.171394	0.262257	0.19687	0.168673	67.5024	72.324	67.5024	53.0376	0.40542	0.583258	0.44556	0.475674	0.00255428	0.0034904	0.00308642	0.00258732	225	162.5	172.5	275
G6AE1	G6AE1	G6AE1	G6AE1	28	28	28	28	98	98	98	98	98.441	93.6194	92.0122	93.6194	MALE	MALE	MALE	MALE	0.175886	0.0267679	0.234938	0.216226	55.0466	64.6898	60.6718	69.9132	0.410796	0.543612	0.436488	0.587506	0.00262123	0.00280505	0.00368324	0.00331675	247.5	237.5	132.5	182.5
G6AE1	G6AE1	G6AE1	G6AE1	28	28	28	28	98	98	98	98	98.441	93.6194	92.0122	93.6194	MALE	MALE	MALE	MALE	0.146989	0.0319156	0.224598	0.229549	62.6808	74.333	58.261	71.1186	0.314979	0.576225	0.451636	0.562202	0.00219058	0.00334448	0.00352113	0.00352113	257.5	170	155	157.5
G6AE1	G6AE1	G6AE1	G6AE1	28	28	28	28	98	98	98	98	98.441	93.6194	98.441	93.6194	MALE	MALE	MALE	MALE	0.143072	0.0316509	0.182967	0.190899	63.8862	70.7168	56.252	67.1006	0.367162	0.508754	0.462979	0.500751	0.0021322	0.00331675	0.00258732	0.00292826	295	162.5	265	207.5
G6AE1	G6AE1	G6AE1	G6AE1	28	28	28	28	98	98	98	98	94.423	93.6194	98.441	93.6194	MALE	MALE	MALE	MALE	0.263546	0.0271486	0.181791	0.182867	65.0916	66.297	46.6088	56.6538	0.514558	0.50416	0.391671	0.439177	0.00358423	0.00284495	0.00257069	0.00280505	152.5	220	270	227.5
G6AE1	G6AE1	G6AE1	G6AE1	28	28	28	28	98	98	98	98	94.423	93.6194	98.441	92.0122	MALE	MALE	MALE	MALE	0.2399	0.0240675	0.168775	0.211348	74.7348	44.198	68.7078	63.4844	0.518992	0.36377	0.453517	0.433341	0.00326264	0.00252207	0.00238663	0.00297177	162.5	275	267.5	190
G6AE1	G6AE1	G6AE1	G6AE1	28	28	28	28	98	98	98	98	94.423	93.6194	98.441	92.0122	MALE	MALE	MALE	MALE	0.30447	0.0855852	0.185365	0.195381	72.7258	18.081	57.8592	69.5114	0.611141	0.410932	0.408899	0.451373	0.00414079	0.00896861	0.00262123	0.00274725	122.5	67.5	240	210
G6AE1	G6AE1	G6AE1	G6AE1	28	28	28	28	98	98	98	98	94.423	92.0122	98.441	92.0122	MALE	MALE	MALE	MALE	0.256647	0.203567	0.175042	0.180504	72.7258	65.8952	61.8772	41.7872	0.496422	0.474066	0.415283	0.351153	0.0034904	0.00294985	0.00247525	0.00253807	140	200	255	275
G6AE1	G6AE1	G6AE1	G6AE1	28	28	28	28	98	98	98	98	94.423	92.0122	98.441	92.0122	MALE	MALE	MALE	MALE	0.2399	0.180889	0.142431	0.0577496	55.4484	68.7078	65.4934	71.5204	0.456365	0.439027	0.337595	0.417029	0.00326264	0.00262123	0.0020141	0.000812018	185	225	302.5	1060
G6AE1	G6AE1	G6AE1	G6AE1	28	28	28	28	98	98	98	98	94.423	92.0122	98.441	92.0122	MALE	MALE	MALE	MALE	0.143752	0.120225	0.153233	0.186418	71.5204	8.8396	67.1006	59.0646	0.388698	0.213002	0.345879	0.396407	0.00195503	0.00174216	0.00216685	0.00262123	327.5	532.5	267.5	232.5
G6AE1	G6AE1	G6AE1	G6AE1	28	28	28	28	98	98	98	98	92.414	92.0122	94.423	92.0122	MALE	MALE	MALE	MALE	0.245698	0.107157	0.207774	0.21293	74.7348	43.7962	71.1186	65.0916	0.6027	0.375933	0.562202	0.504586	0.00343053	0.0015528	0.00311042	0.00299401	167.5	527.5	195	205
G6AE1	G6AE1	G6AE1	G6AE1	28	28	28	28	98	98	98	98	92.414	92.0122	94.423	93.2176	MALE	MALE	MALE	MALE	0.228092	0.180889	0.223409	0.228949	75.5384	65.0916	70.315	59.4664	0.4606	0.452025	0.524739	0.533331	0.00318471	0.00262123	0.00334448	0.0034904	150	237.5	165	175
G6AE1	G6AE1	G6AE1	G6AE1	28	28	28	28	98	98	98	98	92.414	92.0122	94.423	93.2176	MALE	MALE	MALE	MALE	0.237548	0.17515	0.241589	0.215769	72.7258	67.1006	77.5474	68.306	0.513963	0.541134	0.625382	0.482728	0.00331675	0.00253807	0.00361664	0.00328947	160	270	152.5	162.5
G6AE1	G6AE1	G6AE1	G6AE1	28	28	28	28	98	98	98	98	92.414	93.2176	94.423	93.2176	MALE	MALE	MALE	MALE	0.160405	0.233017	0.265603	0.187948	56.6538	63.0826	69.5114	68.306	0.271071	0.621503	0.560576	0.519437	0.00223964	0.00340136	0.00397614	0.00286533	237.5	192.5	127.5	217.5
G6AE1	G6AE1	G6AE1	G6AE1	28	28	28	28	98	98	98	98	92.414	93.2176	94.423	93.2176	MALE	MALE	MALE	MALE	0.211271	0.22722	0.216179	0.168622	74.333	70.315	67.5024	55.4484	0.587613	0.578724	0.460767	0.456365	0.00294985	0.00331675	0.00323625	0.00257069	212.5	180	162.5	267.5
G6AE1	G6AE1	G6AE1	G6AE1	28	28	28	28	98	98	98	99	93.6194	93.2176	94.423	79.3555	MALE	MALE	MALE	MALE	0.1681	0.200606	0.142429	0.127828	61.8772	71.1186	64.288	63.4844	0.395381	0.521015	0.274735	0.349776	0.00240096	0.00292826	0.0021322	0.00189934	260	205	235	345
G6AE1	G6AE1	G6AE1	G6AE1	28	28	28	28	98	98	98	99	93.6194	93.2176	92.414	79.3555	MALE	MALE	MALE	MALE	0.232218	0.199148	0.276006	0.191469	77.5474	65.0916	70.7168	45.8052	0.538524	0.409381	0.53777	0.25237	0.00331675	0.00290698	0.00368324	0.00284495	157.5	185	140	170
G6AE1	G6AE1	G6AE1	G6AE1	28	28	28	28	98	99	98	99	93.6194	79.3555	92.414	79.3555	MALE	MALE	MALE	MALE	0.253214	0.151003	0.222692	0.0916914	74.333	53.0376	76.7438	17.6792	0.576225	0.266521	0.475194	0.265853	0.00361664	0.00217865	0.00297177	0.0013624	147.5	260	175	667.5
G6AE1	G6AE1	G6AE1	G6AE1	28	28	28	28	98	99	98	99	93.6194	79.3555	92.414	79.3555	MALE	MALE	MALE	MALE	0.214437	0.161563	0.313538	0.140504	68.306	72.324	48.216	23.7062	0.482728	0.511124	0.512936	0.320354	0.00306279	0.002331	0.0041841	0.00208768	185	287.5	145	405
G6AE1	G6AE1	G6AE1	G6AE1	28	28	28	28	98	99	98	99	93.6194	79.3555	92.414	79.3555	MALE	MALE	MALE	MALE	0.185959	0.0605861	0.137119	0.0435891	66.6988	59.0646	69.1096	49.0196	0.388914	0.389865	0.391556	0.252678	0.00265604	0.000874126	0.00182983	0.000647668	205	992.5	370	1350
G6AE1	G6AE1	G6AE1	G6AE1	28	28	28	28	98	99	98	99	92.0122	79.3555	92.414	79.3555	MALE	MALE	MALE	MALE	0.188482	0.0473432	0.259293	0.0529308	73.1276	24.9116	73.5294	29.7332	0.4459	0.189442	0.519642	0.239784	0.00274725	0.00068306	0.00346021	0.000786473	200	1332.5	147.5	1147.5
G6AE1	G6AE1	G6AE1	G6AE1	28	28	28	28	98	99	98	99	92.0122	79.3555	93.6194	79.3555	MALE	MALE	MALE	MALE	0.183442	0.118176	0.0339516	0.111889	75.1366	33.3494	78.351	58.6628	0.425703	0.374712	0.47775	0.374842	0.0026738	0.00170503	0.002331	0.00166251	197.5	497.5	265	445
G6AE1	G6AE1	G6AE1	G6AE1	28	28	28	28	98	99	98	99	92.0122	79.3555	93.6194	79.3555	MALE	MALE	MALE	MALE	0.176369	0.0497206	0.0517416	0.146626	57.0556	46.6088	75.9402	58.6628	0.327906	0.223009	0.527362	0.310385	0.00257069	0.00071736	0.0035524	0.00217865	215	1185	137.5	270
G6AE1	G6AE1	G6AE1	G6AE1	28	28	28	28	98	99	98	99	92.0122	79.3555	93.6194	96.0302	MALE	MALE	MALE	MALE	0.0560518	0.161563	0.0456591	0.0620541	73.1276	69.5114	74.333	74.7348	0.376946	0.399491	0.409548	0.670267	0.000816993	0.002331	0.0031348	0.003861	1030	255	137.5	147.5
G6AE1	G6AE1	G6AE1	G6AE1	28	28	28	28	98	99	98	99	92.0122	96.0302	93.6194	96.0302	MALE	MALE	MALE	MALE	0.181022	0.324073	0.0467584	0.0679577	65.8952	76.7438	60.6718	74.333	0.358126	0.737921	0.421332	0.652044	0.00263852	0.00422833	0.00321027	0.00422833	195	132.5	167.5	122.5
G6AE1	G6AE1	G6AE1	G6AE1	28	28	28	28	98	99	98	99	92.0122	96.0302	93.6194	96.0302	MALE	MALE	MALE	MALE	0.21013	0.314112	0.0432845	0.0570941	67.9042	75.1366	35.3584	73.1276	0.488519	0.689327	0.348359	0.535733	0.00306279	0.00409836	0.00297177	0.0035524	187.5	135	235	145
G6AE1	G6AE1	G6AE1	G6AE1	28	28	28	28	98	99	98	99	93.2176	96.0302	93.6194	96.0302	MALE	MALE	MALE	MALE	0.232433	0.229471	0.0916053	0.0503824	72.7258	77.9492	17.6792	67.1006	0.54273	0.523149	0.238908	0.563871	0.00323625	0.00299401	0.00628931	0.0031348	175	185	85	200
G6AE1	G6AE1	G6AE1	G6AE1	28	28	28	28	98	99	98	99	93.2176	96.0302	92.0122	96.0302	MALE	MALE	MALE	MALE	0.213438	0.216507	0.200597	0.0492251	73.5294	73.5294	65.8952	39.7782	0.44835	0.485343	0.427891	0.459864	0.00297177	0.00282486	0.00301659	0.00306279	172.5	202.5	177.5	240
G6AE1	G6AE1	G6AE1	G6AE1	28	28	28	28	98	99	98	99	93.2176	92.414	92.0122	96.0302	MALE	MALE	MALE	MALE	0.238215	0.0346032	0.176621	0.14745	67.1006	78.351	71.5204	24.5098	0.552268	0.544104	0.359399	0.433802	0.00331675	0.00334448	0.00265604	0.00917431	180	155	177.5	52.5
G6AE1	G6AE1	G6AE1	G6AE1	28	28	28	28	98	99	98	99	93.2176	92.414	92.0122	92.414	MALE	MALE	MALE	MALE	0.167417	0.0252967	0.170946	0.0620883	68.306	70.315	69.9132	88.396	0.376342	0.479966	0.322925	0.564831	0.002331	0.00244499	0.00257069	0.00441501	247.5	262.5	172.5	70
G6AE1	G6AE1	G6AE1	G6AE1	28	28	28	28	99	99	98	99	79.3555	92.414	92.0122	92.414	MALE	MALE	MALE	MALE	0.157833	0.0257692	0.200597	0.0381111	69.1096	65.8952	18.8846	70.315	0.386087	0.44225	0.334241	0.416065	0.0023175	0.00249066	0.00301659	0.00271003	252.5	252.5	275	200
G6AE1	G6AE1	G6AE1	G6AE1	28	28	28	28	99	99	98	99	79.3555	92.414	92.0122	92.414	MALE	MALE	MALE	MALE	0.129972	0.0305202	0.0774132	0.0356929	67.1006	70.7168	45.8052	65.8952	0.350395	0.482709	0.219164	0.427891	0.0019084	0.00294985	0.00116414	0.00253807	332.5	192.5	650	240
G6AE1	G6AE1	G6AE1	G6AE1	28	28	28	28	99	99	98	99	79.3555	92.414	92.0122	92.414	MALE	MALE	MALE	MALE	0.207006	0.0174181	0.18653	0.0371055	54.243	38.171	63.0826	67.5024	0.370259	0.358413	0.430598	0.533616	0.00303951	0.0016835	0.00280505	0.00263852	182.5	487.5	210	252.5
G6AE1	G6AE1	G6AE1	G6AE1	28	28	28	28	99	99	98	99	79.3555	92.414	92.0122	92.414	MALE	MALE	MALE	MALE	0.0915391	0.0442152	0.172051	0.0447866	24.108	19.2864	67.5024	31.3404	0.17991	0.279513	0.460767	0.342518	0.00134409	0.0042735	0.00258732	0.00318471	610	165	240	222.5
G6AE1	G6AE1	G6AE1	G6AE1	28	28	28	28	99	99	98	99	79.3555	94.423	93.2176	92.414	MALE	MALE	MALE	MALE	0.125771	0.340022	0.204896	0.0553661	11.6522	82.7708	63.8862	22.9026	0.168872	0.777191	0.57297	0.29938	0.00184672	0.00484262	0.00361664	0.00393701	472.5	100	165	177.5
G6AE1	G6AE1	G6AE1	G6AE1	28	28	28	28	99	99	98	99	79.3555	94.423	93.2176	92.414	MALE	MALE	MALE	MALE	0.0449836	0.335955	0.183346	0.0210998	65.0916	79.5564	71.9222	26.117	0.214117	0.824419	0.526903	0.239606	0.000660502	0.00478469	0.00323625	0.00150038	1210	112.5	172.5	557.5
G6AE1	G6AE1	G6AE1	G6AE1	28	28	28	28	99	99	98	99	79.3555	94.423	93.2176	92.414	MALE	MALE	MALE	MALE	0.0534577	0.352837	0.162332	0.0844625	24.9116	81.1636	71.1186	23.7062	0.213833	0.819834	0.447287	0.217488	0.000784929	0.00502513	0.00286533	0.00600601	1157.5	100	190	57.5
G6AE1	G6AE1	G6AE1	G6AE1	28	28	28	28	99	99	98	99	79.3555	94.423	93.2176	94.423	MALE	MALE	MALE	MALE	0.117625	0.328105	0.210609	0.402318	71.1186	72.324	47.4124	71.5204	0.391838	0.812629	0.467117	0.781644	0.00172712	0.0046729	0.00371747	0.00515464	397.5	125	167.5	102.5
G6AE1	G6AE1	G6AE1	G6AE1	28	28	28	28	99	99	99	99	79.3555	94.423	79.3555	94.423	MALE	MALE	MALE	MALE	0.148377	0.300062	0.127659	0.360506	67.9042	70.7168	64.6898	80.7618	0.306565	0.607011	0.21106	0.776556	0.00217865	0.0042735	0.00185529	0.00461894	237.5	117.5	232.5	112.5
G6AE1	G6AE1	G6AE1	G6AE1	28	28	28	28	99	99	99	99	96.0302	90.405	79.3555	94.423	MALE	MALE	MALE	MALE	0.0688122	0.172495	0.190341	0.387343	80.36	64.288	68.306	77.1456	0.704912	0.551828	0.429597	0.691889	0.00393701	0.00257069	0.00276625	0.00496278	140	272.5	202.5	90
G6AE1	G6AE1	G6AE1	G6AE1	28	28	28	28	99	99	99	99	96.0302	90.405	79.3555	94.423	MALE	MALE	MALE	MALE	0.0763245	0.161106	0.058238	0.373443	76.342	69.1096	58.6628	77.9492	0.700385	0.456169	0.256169	0.571056	0.00436681	0.00240096	0.000846382	0.00478469	120	265	952.5	72.5
G6AE1	G6AE1	G6AE1	G6AE1	28	28	28	28	99	99	99	99	96.0302	90.405	79.3555	94.423	MALE	MALE	MALE	MALE	0.0589487	0.228233	0.0549806	0.360506	79.1546	70.7168	16.8756	69.1096	0.513991	0.582031	0.286027	0.735209	0.00337268	0.00340136	0.000799041	0.00461894	142.5	172.5	1192.5	122.5
G6AE1	G6AE1	G6AE1	G6AE1	28	28	28	28	99	99	99	99	96.0302	90.405	79.3555	90.405	MALE	MALE	MALE	MALE	0.0523302	0.196488	0.364065	0.156178	76.7438	64.288	14.4648	55.0466	0.490376	0.618154	0.189082	0.418605	0.00299401	0.00292826	0.00529101	0.002331	177.5	237.5	112.5	297.5
G6AE1	G6AE1	G6AE1	G6AE1	28	28	28	28	99	99	99	99	96.0302	90.405	79.3555	90.405	MALE	MALE	MALE	MALE	0.0599599	0.171394	0.144403	0.184066	43.3944	60.6718	30.135	63.0826	0.549296	0.489289	0.28976	0.367829	0.00343053	0.00255428	0.00209864	0.00274725	212.5	267.5	372.5	192.5
G6AE1	G6AE1	G6AE1	G6AE1	28	28	28	28	99	99	99	99	96.0302	95.6284	79.3555	90.405	MALE	MALE	MALE	MALE	0.150028	0.229332	0.0448554	0.185339	20.4918	70.315	52.6358	70.315	0.347319	0.590882	0.173144	0.590882	0.00858369	0.00311042	0.00065189	0.00276625	57.5	202.5	1230	242.5
G6AE1	G6AE1	G6AE1	G6AE1	28	28	28	28	99	99	99	99	92.414	95.6284	79.3555	90.405	MALE	MALE	MALE	MALE	0.0755521	0.293162	0.16422	0.193363	87.9942	75.9402	64.288	65.4934	0.600643	0.786945	0.300411	0.39935	0.0042735	0.00397614	0.00238663	0.002886	87.5	155	205	182.5
G6AE1	G6AE1	G6AE1	G6AE1	28	28	28	28	99	99	99	99	92.414	95.6284	96.0302	90.405	MALE	MALE	MALE	MALE	0.0510222	0.264266	0.283036	0.189266	71.1186	78.7528	77.9492	59.8682	0.447287	0.706303	0.628623	0.35425	0.002886	0.00358423	0.00368324	0.00282486	187.5	167.5	147.5	185
G6AE1	G6AE1	G6AE1	G6AE1	28	28	28	28	99	99	99	99	92.414	95.6284	96.0302	95.6284	MALE	MALE	MALE	MALE	0.0463413	0.279281	0.318196	0.233733	69.9132	66.6988	82.369	79.5564	0.502973	0.62628	0.70703	0.593704	0.00262123	0.00378788	0.00414079	0.00323625	242.5	157.5	125	175
G6AE1	G6AE1	G6AE1	G6AE1	28	28	28	28	99	99	99	99	92.414	95.6284	96.0302	95.6284	MALE	MALE	MALE	MALE	0.0451576	0.208278	0.314935	0.281573	75.5384	66.297	74.7348	75.5384	0.563719	0.46853	0.6415	0.563719	0.00255428	0.00282486	0.00409836	0.00389864	257.5	212.5	127.5	122.5
G6AE1	G6AE1	G6AE1	G6AE1	28	28	28	28	99	99	99	99	92.414	95.6284	96.0302	95.6284	MALE	MALE	MALE	MALE	0.0558585	0.185953	0.233569	0.258866	28.126	70.7168	77.9492	73.9312	0.345104	0.570297	0.498078	0.562214	0.00315956	0.00252207	0.00303951	0.00358423	235	272.5	172.5	147.5
G6AE1	G6AE1	G6AE1	G6AE1	28	28	28	28	99	99	99	99	92.414	90.8068	96.0302	95.6284	MALE	MALE	MALE	MALE	0.0717209	0.157518	0.214051	0.261206	16.8756	69.1096	72.7258	61.0736	0.228049	0.434652	0.424057	0.513224	0.0040568	0.00257069	0.00278552	0.00361664	172.5	230	187.5	157.5
G6AE1	G6AE1	G6AE1	G6AE1	28	28	28	28	99	99	99	99	92.414	90.8068	92.414	95.6284	MALE	MALE	MALE	MALE	0.0289112	0.161674	0.169582	0.166414	26.9206	44.5998	76.7438	64.288	0.302479	0.359676	0.441056	0.431463	0.00163532	0.00263852	0.00331675	0.00230415	522.5	255	127.5	285
G6AE1	G6AE1	G6AE1	G6AE1	28	28	28	28	99	99	99	99	92.414	90.8068	92.414	90.8068	MALE	MALE	MALE	MALE	0.0780539	0.0380823	0.128951	0.142996	18.8846	32.5458	71.9222	61.8772	0.2009	0.425435	0.380541	0.395381	0.00441501	0.000621504	0.00252207	0.00250627	132.5	1532.5	207.5	242.5
G6AE1	G6AE1	G6AE1	G6AE1	28	28	28	28	99	99	99	99	94.423	90.8068	92.414	90.8068	MALE	MALE	MALE	MALE	0.357811	0.152614	0.125779	0.0469014	85.5834	68.7078	70.7168	14.063	0.734621	0.468995	0.346651	0.167417	0.00451467	0.00249066	0.00246002	0.00082203	105	255	202.5	1132.5
G6AE1	G6AE1	G6AE1	G6AE1	28	28	28	28	99	99	99	99	94.423	90.8068	92.414	90.8068	MALE	MALE	MALE	MALE	0.398267	0.10675	0.168188	0.0730078	81.5654	45.4034	64.288	60.27	0.8036	0.320872	0.470974	0.385112	0.00502513	0.00174216	0.00328947	0.00127959	97.5	432.5	167.5	625
G6AE1	G6AE1	G6AE1	G6AE1	28	28	28	28	99	99	99	99	94.423	90.8068	92.414	90.8068	MALE	MALE	MALE	MALE	0.370351	0.145372	0.0898577	0.134565	83.5744	61.8772	36.5638	45.0016	0.749546	0.437295	0.360234	0.27028	0.0046729	0.00237248	0.00175747	0.00235849	102.5	280	467.5	257.5
G6AE1	G6AE1	G6AE1	G6AE1	28	28	28	28	99	99	99	99	94.423	90.8068	94.423	90.8068	MALE	MALE	MALE	MALE	0.398267	0.132772	0.30715	0.102526	77.1456	55.0466	85.5834	51.0286	0.676716	0.299166	0.750732	0.38805	0.00502513	0.00216685	0.00461894	0.00179695	85	277.5	102.5	425
G6AE1	G6AE1	G6AE1	G6AE1	28	28	28	28	99	99	99	99	94.423	94.0212	94.423	90.8068	MALE	MALE	MALE	MALE	0.349912	0.0947388	0.314411	0.134565	78.351	77.5474	81.9672	65.0916	0.658412	0.568113	0.719011	0.415921	0.00441501	0.00334448	0.00472813	0.00235849	107.5	162.5	97.5	267.5
G6AE1	G6AE1	G6AE1	G6AE1	28	28	28	28	99	99	99	99	90.405	94.0212	94.423	90.8068	MALE	MALE	MALE	MALE	0.163188	0.0861	0.342773	0.0720854	57.0556	69.1096	78.7528	49.8232	0.40322	0.456169	0.739463	0.378884	0.0023175	0.00303951	0.00515464	0.00126342	290	177.5	87.5	660
G6AE1	G6AE1	G6AE1	G6AE1	28	28	28	28	99	99	99	99	90.405	94.0212	94.423	94.0212	MALE	MALE	MALE	MALE	0.179861	0.0811659	0.318172	0.14453	74.333	74.7348	74.333	74.333	0.351456	0.477539	0.750838	0.576225	0.00255428	0.00286533	0.00478469	0.00326264	180	192.5	110	177.5
G6AE1	G6AE1	G6AE1	G6AE1	28	28	28	28	99	99	99	99	90.405	94.0212	94.423	94.0212	MALE	MALE	MALE	MALE	0.210825	0.0648955	0.330014	0.139964	72.7258	69.1096	56.252	77.1456	0.586498	0.301789	0.669667	0.485192	0.00299401	0.00229095	0.00496278	0.00315956	210	207.5	117.5	157.5
G6AE1	G6AE1	G6AE1	G6AE1	28	28	28	28	99	99	99	99	90.405	94.0212	90.405	94.0212	MALE	MALE	MALE	MALE	0.201763	0.0585267	0.194367	0.128775	69.1096	45.0016	60.27	63.8862	0.391556	0.278648	0.441538	0.505029	0.00286533	0.00206612	0.00271003	0.00290698	172.5	322.5	232.5	217.5
G6AE1	G6AE1	G6AE1	G6AE1	28	28	28	28	99	99	99	99	90.405	94.0212	90.405	94.0212	MALE	MALE	MALE	MALE	0.184575	0.0256584	0.170157	0.13263	70.315	23.3044	67.9042	67.9042	0.317449	0.247919	0.471557	0.479888	0.00262123	0.000905797	0.00237248	0.00299401	160	1010	277.5	192.5
G6AE1	G6AE1	G6AE1	G6AE1	28	28	28	28	99	99	99	99	95.6284	90.405	90.405	94.0212	MALE	MALE	MALE	MALE	0.260837	0.212928	0.168162	0.0939522	76.342	53.4394	73.9312	54.243	0.559282	0.479277	0.39117	0.352227	0.00368324	0.00323625	0.00234467	0.00212089	135	197.5	237.5	317.5
G6AE1	G6AE1	G6AE1	G6AE1	28	28	28	28	99	99	99	99	95.6284	90.405	90.405	94.0212	MALE	MALE	MALE	MALE	0.268247	0.124966	0.246042	0.0690545	80.7618	65.0916	69.9132	31.3404	0.51605	0.535733	0.494086	0.242949	0.00378788	0.00189934	0.00343053	0.00155885	107.5	405	150	512.5
G6AE1	G6AE1	G6AE1	G6AE1	28	28	28	28	99	99	99	99	95.6284	90.405	90.405	90.405	MALE	MALE	MALE	MALE	0.28158	0.211219	0.216354	0.153881	73.1276	58.6628	64.6898	28.5278	0.556103	0.503543	0.555277	0.311779	0.00397614	0.00321027	0.00301659	0.00303951	120	195	215	237.5
G6AE1	G6AE1	G6AE1	G6AE1	28	28	28	28	99	99	99	99	95.6284	90.405	90.405	90.405	MALE	MALE	MALE	MALE	0.242941	0.175922	0.166214	0.275146	67.9042	65.8952	66.6988	22.9026	0.471557	0.531413	0.377897	0.405356	0.00343053	0.0026738	0.0023175	0.00543478	147.5	250	255	127.5
G6AE1	G6AE1	G6AE1	G6AE1	28	28	28	28	99	99	99	99	95.6284	90.405	95.6284	90.405	MALE	MALE	MALE	MALE	0.167022	0.198476	0.24831	0.156256	69.1096	60.6718	74.7348	57.0556	0.375596	0.532209	0.57934	0.511709	0.00235849	0.00301659	0.00294985	0.00308642	240	217.5	210	212.5
G6AE1	G6AE1	G6AE1	G6AE1	28	28	28	28	99	99	99	99	90.8068	97.2356	95.6284	90.405	MALE	MALE	MALE	MALE	0.0468329	0.362773	0.321901	0.138136	73.9312	78.7528	81.5654	59.8682	0.424892	0.739463	0.67132	0.388755	0.00217865	0.00441501	0.00382409	0.00272851	285	120	140	212.5
G6AE1	G6AE1	G6AE1	G6AE1	28	28	28	28	99	99	99	99	90.8068	97.2356	95.6284	90.405	MALE	MALE	MALE	MALE	0.0574767	0.366822	0.315862	0.149342	64.6898	73.9312	77.1456	59.8682	0.413353	0.766126	0.634943	0.446778	0.0026738	0.00446429	0.00375235	0.00294985	217.5	127.5	145	205
G6AE1	G6AE1	G6AE1	G6AE1	28	28	28	28	99	99	99	99	90.8068	97.2356	95.6284	90.405	MALE	MALE	MALE	MALE	0.0181941	0.375197	0.338061	0.149342	18.081	76.342	65.0916	32.144	0.334833	0.791109	0.641297	0.301822	0.000846382	0.00456621	0.00401606	0.00294985	1127.5	122.5	147.5	232.5
G6AE1	G6AE1	G6AE1	G6AE1	28	28	28	28	99	99	99	99	90.8068	97.2356	95.6284	97.2356	MALE	MALE	MALE	MALE	0.0256979	0.354938	0.279194	0.375655	73.1276	77.5474	51.0286	74.333	0.392105	0.8036	0.479142	0.790777	0.00119546	0.00431965	0.00331675	0.00456621	650	135	195	125
G6AE1	G6AE1	G6AE1	G6AE1	28	28	28	28	99	99	99	99	90.8068	92.8158	95.6284	97.2356	MALE	MALE	MALE	MALE	0.0594642	0.240864	0.186439	0.379993	45.4034	75.1366	70.7168	70.315	0.351964	0.705508	0.548192	0.748032	0.00276625	0.00358423	0.00221484	0.00461894	232.5	172.5	322.5	122.5
G6AE1	G6AE1	G6AE1	G6AE1	28	28	28	28	99	99	99	99	90.8068	92.8158	90.8068	97.2356	MALE	MALE	MALE	MALE	0.0345878	0.275414	0.145536	0.355372	67.1006	76.7438	65.8952	72.7258	0.35503	0.720599	0.389912	0.794817	0.00160901	0.00409836	0.00272851	0.00431965	432.5	137.5	197.5	140
G6AE1	G6AE1	G6AE1	G6AE1	28	28	28	28	99	99	99	99	90.8068	92.8158	90.8068	97.2356	MALE	MALE	MALE	MALE	0.0545591	0.252162	0.155055	0.363217	62.6808	70.315	40.5818	71.9222	0.400516	0.603562	0.355981	0.726487	0.00253807	0.00375235	0.00290698	0.00441501	237.5	150	230	127.5
G6AE1	G6AE1	G6AE1	G6AE1	28	28	28	28	99	99	99	99	90.8068	92.8158	90.8068	97.2356	MALE	MALE	MALE	MALE	0.0468329	0.0695303	0.0438462	0.363217	17.2774	62.6808	12.054	74.7348	0.233478	0.549832	0.162892	0.718604	0.00217865	0.00103466	0.00082203	0.00441501	385	852.5	1142.5	122.5
G6AE1	G6AE1	G6AE1	G6AE1	28	28	28	28	99	99	99	99	90.8068	92.8158	90.8068	92.8158	MALE	MALE	MALE	MALE	0.0594642	0.212326	0.114955	0.241218	39.3764	66.6988	34.5548	67.1006	0.179801	0.585077	0.150894	0.552268	0.00276625	0.00315956	0.00215517	0.00343053	142.5	202.5	235	170
G6AE1	G6AE1	G6AE1	G6AE1	28	28	28	28	99	99	99	99	94.0212	92.8158	90.8068	92.8158	MALE	MALE	MALE	MALE	0.0962966	0.195352	0.138904	0.263846	80.36	64.6898	67.5024	81.5654	0.505409	0.465394	0.371914	0.547419	0.00306279	0.00290698	0.00260417	0.00375235	167.5	205	202.5	117.5
G6AE1		G6AE1	G6AE1	28		28	28	99		99	99	94.0212		90.8068	92.8158	MALE		MALE	MALE	0.114748		0.100356	0.276831	71.5204		40.5818	72.7258	0.496669		0.217597	0.598566	0.00364964		0.00188147	0.00393701	130		345	132.5
G6AE1		G6AE1	G6AE1	28		28	28	99		99	99	94.0212		90.8068	92.8158	MALE		MALE	MALE	0.0824138		0.112529	0.285254	78.351		71.9222	35.7602	0.431686		0.361418	0.4018	0.00262123		0.0021097	0.0040568	200		275	157.5
G6AE1		G6AE1	G6AE1	28		28	28	99		99	99	94.0212		90.8068	92.8158	MALE		MALE	MALE	0.087579		0.148576	0.1028	74.7348		46.207	25.7152	0.395422		0.358194	0.372684	0.00278552		0.00278552	0.00146199	170		230	615
G6AE1		G6AE1	G6AE1	28		28	28	99		99	99	94.0212		94.0212	92.8158	MALE		MALE	MALE	0.0630077		0.0778753	0.212112	61.0736		78.351	56.6538	0.266697		0.492774	0.508106	0.00200401		0.00301659	0.00301659	270		172.5	220
G6AE1		G6AE1	G6AE1	28		28	28	99		99	99	94.0212		94.0212	92.8158	MALE		MALE	MALE	0.0704162		0.0835458	0.227557	23.3044		82.7708	63.4844	0.350442		0.512513	0.433341	0.00223964		0.00323625	0.00323625	380		147.5	162.5
G6AE1		G6AE1		28		28		99		99		90.405		94.0212		MALE		MALE		0.152275		0.0809268		30.5368		66.6988		0.286731		0.400593		0.00318471		0.0031348		207.5		152.5
G6AE1		G6AE1		28		28		99		99		90.405		94.0212		MALE		MALE		0.243329		0.0714126		29.7332		81.1636		0.266665		0.441107		0.00508906		0.00276625		85		177.5
G6AE1		G6AE1		28		28		99		99		90.405		94.0212		MALE		MALE		0.145332		0.065522		62.279		63.4844		0.482783		0.307431		0.00303951		0.00253807		200		187.5
G6AE1		G6AE1		28		28		99		99		90.405		94.0212		MALE		MALE		0.130462		0.0568627		67.1006		47.8142		0.374864		0.315605		0.00272851		0.00220264		187.5		302.5
G6AE1		G6AE1		28		28		99		99		90.405		94.0212		MALE		MALE		0.137003		0.024787		66.297		22.099		0.416962		0.309077		0.00286533		0.000960154		190		970
G6AE1		G6AE1		28		28		99		99		90.405		90.405		MALE		MALE		0.164028		0.213154		33.3494		56.252		0.354781		0.390639		0.00343053		0.00321027		197.5		167.5
G6AE1		G6AE1		28		28		99		99		97.2356		90.405		MALE		MALE		0.370509		0.129178		80.7618		65.4934		0.776556		0.447054		0.00451467		0.00194553		117.5		367.5
G6AE1		G6AE1		28		28		99		99		97.2356		90.405		MALE		MALE		0.358374		0.200294		78.7528		63.8862		0.690814		0.4018		0.00436681		0.00301659		115		172.5
G6AE1		G6AE1		28		28		99		99		97.2356		90.405		MALE		MALE		0.366373		0.188897		77.5474		63.8862		0.728145		0.451493		0.00446429		0.00284495		117.5		210
G6AE1		G6AE1		28		28		99		99		97.2356		90.405		MALE		MALE		0.358374		0.197318		79.1546		64.288		0.694339		0.479761		0.00436681		0.00297177		115		202.5
G6AE1		G6AE1		28		28		99		99		97.2356		97.2356		MALE		MALE		0.36233		0.338764		79.9582		81.1636		0.686336		0.727925		0.00441501		0.00451467		110		110
G6AE1		G6AE1		28		28		99		99		92.8158		97.2356		MALE		MALE		0.230733		0.359025		78.351		75.9402		0.47775		0.786945		0.00315956		0.00478469		152.5		112.5
G6AE1		G6AE1		28		28		99		99		92.8158		97.2356		MALE		MALE		0.318896		0.317278		79.1546		78.7528		0.694339		0.706303		0.00436681		0.00422833		115		125
G6AE1		G6AE1		28		28		99		99		92.8158		97.2356		MALE		MALE		0.287508		0.338764		75.9402		77.5474		0.612421		0.745648		0.00393701		0.00451467		130		117.5
G6AE1		G6AE1		28		28		99		99		92.8158		97.2356		MALE		MALE		0.329694		0.331285		36.9656		78.351		0.48321		0.771931		0.00451467		0.00441501		145		125
G6AE1		G6AE1		28		28		99		99		92.8158		97.2356		MALE		MALE		0.107156		0.327669		11.2504		69.9132		0.288472		0.672242		0.00146735		0.00436681		642.5		125
G6AE1		G6AE1		28		28		99		99		92.8158		92.8158		MALE		MALE		0.209247		0.24539		69.5114		83.1726		0.482718		0.609323		0.00286533		0.00346021		205		152.5
G6AE1		G6AE1		28		28		99		99		92.8158		92.8158		MALE		MALE		0.225392		0.287699		70.315		78.7528		0.442233		0.598881		0.00308642		0.0040568		165		115
		G6AE1				28				99				92.8158				MALE				0.279204				70.315				0.534715				0.00393701				122.5
		G6AE1				28				99				92.8158				MALE				0.0753242				61.0736				0.482795				0.00106213				815
		G6AE1				28				99				92.8158				MALE				0.218882				69.1096				0.546321				0.00308642				197.5
		G6AE1				28				99				92.8158				MALE				0.196176				66.297				0.39818				0.00276625				195
G6AE2	G6AE2	G6AE2	G6AE2	29	29	29	29	100	100	100	100	91.6104	91.6104	91.6104	91.6104	MALE	MALE	MALE	MALE	0.292915	0.249648	0.199927	0.315137	75.5384	78.7528	78.351	76.342	0.693013	0.837796	0.73569	0.771131	0.00508906	0.00490196	0.00484262	0.00490196	87.5	110	100	105
G6AE2	G6AE2	G6AE2	G6AE2	29	29	29	29	100	100	100	100	91.6104	91.6104	91.6104	91.6104	MALE	MALE	MALE	MALE	0.285647	0.252745	0.199927	0.303962	73.5294	73.5294	74.333	70.315	0.707013	0.850051	0.681954	0.692759	0.00496278	0.00496278	0.00484262	0.00472813	97.5	115	97.5	110
G6AE2	G6AE2	G6AE2	G6AE2	29	29	29	29	100	100	100	100	91.6104	91.6104	91.6104	91.6104	MALE	MALE	MALE	MALE	0.312814	0.243675	0.224375	0.319047	47.0106	69.1096	55.8502	55.8502	0.614518	0.776512	0.685279	0.664883	0.00543478	0.00478469	0.00543478	0.00496278	107.5	120	102.5	117.5
G6AE2	G6AE2	G6AE2	G6AE2	29	29	29	29	100	100	100	100	91.6104	91.6104	91.6104	91.6104	MALE	MALE	MALE	MALE	0.145165	0.25592	0.215587	0.176615	53.4394	35.3584	40.18	36.162	0.364774	0.599295	0.604211	0.612915	0.00252207	0.00502513	0.00522193	0.00274725	250	140	125	305
G6AE2	G6AE2	G6AE2	G6AE2	29	29	29	29	100	100	100	100	91.6104	91.6104	91.6104	91.6104	MALE	MALE	MALE	MALE	0.330792	0.135267	0.103471	0.300411	51.0286	63.0826	66.6988	65.0916	0.689576	0.729279	0.657131	0.641297	0.00574713	0.00265604	0.00250627	0.0046729	100	290	297.5	112.5
G6AE2	G6AE2	G6AE2	G6AE2	29	29	29	29	100	100	100	100	96.8338	91.6104	91.6104	96.8338	MALE	MALE	MALE	MALE	0.284758	0.240795	0.233909	0.42976	79.9582	43.7962	30.9386	67.1006	0.787766	0.712133	0.483416	0.906765	0.00446429	0.00472813	0.00566572	0.00515464	122.5	150	112.5	120
G6AE2	G6AE2	G6AE2	G6AE2	29	29	29	29	100	100	100	100	96.8338	96.8338	96.8338	96.8338	MALE	MALE	MALE	MALE	0.305195	0.406052	0.366347	0.418962	76.7438	68.7078	75.9402	79.1546	0.77519	0.898141	0.786945	0.889378	0.00478469	0.00529101	0.00490196	0.00502513	110	112.5	107.5	110
G6AE2	G6AE2	G6AE2	G6AE2	29	29	29	29	100	100	100	100	96.8338	96.8338	96.8338	96.8338	MALE	MALE	MALE	MALE	0.342015	0.385647	0.370892	0.413764	75.9402	81.9672	79.9582	79.9582	0.829948	0.947598	0.828582	0.981082	0.00536193	0.00502513	0.00496278	0.00496278	95	112.5	105	120
G6AE2	G6AE2	G6AE2	G6AE2	29	29	29	29	100	100	100	100	96.8338	96.8338	96.8338	96.8338	MALE	MALE	MALE	MALE	0.305195	0.371641	0.357583	0.424293	88.7978	85.1816	81.1636	77.1456	0.814659	0.930946	0.711961	0.820698	0.00478469	0.00484262	0.00478469	0.00508906	100	115	95	102.5
G6AE2	G6AE2	G6AE2	G6AE2	29	29	29	29	100	100	100	100	96.8338	96.8338	96.8338	92.0122	MALE	MALE	MALE	MALE	0.333085	0.380863	0.395422	0.19757	77.9492	88.396	81.5654	49.4214	0.749512	0.870897	0.765872	0.475206	0.00522193	0.00496278	0.00529101	0.00368324	87.5	100	82.5	167.5
G6AE2	G6AE2	G6AE2	G6AE2	29	29	29	29	100	100	100	100	96.8338	96.8338	96.8338	92.0122	MALE	MALE	MALE	MALE	0.328793	0.376195	0.395422	0.157073	53.8412	77.5474	65.4934	45.4034	0.640967	0.8036	0.715775	0.510151	0.00515464	0.00490196	0.00529101	0.00292826	110	107.5	97.5	252.5
G6AE2	G6AE2	G6AE2	G6AE2	29	29	29	29	100	100	100	100	92.0122	92.0122	92.0122	92.0122	MALE	MALE	MALE	MALE	0.216783	0.219544	0.233834	0.161811	44.198	66.6988	58.6628	60.27	0.496607	0.572522	0.492965	0.441538	0.0042735	0.00378788	0.00409836	0.00301659	145	147.5	125	195
G6AE2	G6AE2	G6AE2	G6AE2	29	29	29	29	100	100	100	100	92.0122	92.0122	92.0122	92.0122	MALE	MALE	MALE	MALE	0.12479	0.192238	0.202684	0.188874	63.4844	41.3854	42.5908	55.0466	0.345024	0.478444	0.419614	0.482865	0.00246002	0.00331675	0.0035524	0.00352113	222.5	215	180	170
G6AE2	G6AE2	G6AE2	G6AE2	29	29	29	29	100	100	100	100	92.0122	92.0122	92.0122	92.0122	MALE	MALE	MALE	MALE	0.190346	0.169721	0.151542	0.159407	51.4304	59.0646	65.0916	57.0556	0.471839	0.567929	0.429648	0.511709	0.00375235	0.00292826	0.00265604	0.00297177	157.5	237.5	225	225
G6AE2	G6AE2	G6AE2	G6AE2	29	29	29	29	100	100	100	100	92.0122	92.0122	92.0122	92.0122	MALE	MALE	MALE	MALE	0.164166	0.183127	0.183164	0.143423	58.261	55.0466	58.261	49.0196	0.500094	0.618501	0.426821	0.495147	0.00323625	0.00315956	0.00321027	0.0026738	192.5	227.5	175	275
G6AE2	G6AE2	G6AE2	G6AE2	29	29	29	29	100	100	100	100	92.0122	92.0122	92.0122	97.2356	MALE	MALE	MALE	MALE	0.147463	0.178888	0.170825	0.343382	62.6808	55.8502	56.252	71.5204	0.47666	0.512387	0.33785	0.8036	0.00290698	0.00308642	0.00299401	0.00472813	212.5	215	167.5	122.5
G6AE2	G6AE2	G6AE2	G6AE2	29	29	29	29	100	100	100	100	92.0122	92.0122	92.0122	97.2356	MALE	MALE	MALE	MALE	0.139361	0.193845	0.2045	0.360424	50.225	54.243	49.4214	69.9132	0.310991	0.509324	0.383112	0.857831	0.00274725	0.00334448	0.00358423	0.00496278	202.5	192.5	150	120
G6AE2	G6AE2	G6AE2	G6AE2	29	29	29	29	100	100	100	100	97.2356	97.2356	97.2356	97.2356	MALE	MALE	MALE	MALE	0.369979	0.360467	0.318521	0.335452	74.7348	73.5294	76.7438	83.1726	0.718604	0.850051	0.720599	0.861892	0.00472813	0.00478469	0.0042735	0.00461894	107.5	122.5	127.5	120
G6AE2	G6AE2	G6AE2	G6AE2	29	29	29	29	100	100	100	100	97.2356	97.2356	97.2356	97.2356	MALE	MALE	MALE	MALE	0.353276	0.356206	0.352406	0.364952	83.9762	81.1636	72.324	74.7348	0.736633	0.863443	0.695423	0.839717	0.00451467	0.00472813	0.00472813	0.00502513	107.5	117.5	107.5	110
G6AE2	G6AE2	G6AE2	G6AE2	29	29	29	29	100	100	100	100	97.2356	97.2356	97.2356	97.2356	MALE	MALE	MALE	MALE	0.383581	0.373883	0.348289	0.351697	82.7708	83.1726	84.7798	65.0916	0.759365	0.861892	0.727724	0.823944	0.00490196	0.00496278	0.0046729	0.00484262	95	105	97.5	127.5
G6AE2	G6AE2	G6AE2	G6AE2	29	29	29	29	100	100	100	100	97.2356	97.2356	97.2356	89.6014	MALE	MALE	MALE	MALE	0.414024	0.373883	0.384195	0.235481	77.1456	73.5294	78.351	70.315	0.741785	0.8036	0.753375	0.55585	0.00529101	0.00496278	0.00515464	0.00409836	85	110	90	117.5
G6AE2	G6AE2	G6AE2	G6AE2	29	29	29	29	100	100	100	100	97.2356	89.6014	97.2356	89.6014	MALE	MALE	MALE	MALE	0.338015	0.0537525	0.379307	0.150609	75.9402	60.27	69.9132	55.8502	0.666142	0.441538	0.706194	0.4018	0.00431965	0.00334448	0.00508906	0.00262123	117.5	162.5	97.5	242.5
G6AE2	G6AE2	G6AE2	G6AE2	29	29	29	29	100	100	100	100	89.6014	89.6014	89.6014	89.6014	MALE	MALE	MALE	MALE	0.249424	0.0454011	0.057112	0.18154	66.6988	56.6538	73.1276	61.0736	0.560494	0.558166	0.589739	0.513224	0.00451467	0.00282486	0.00334448	0.00315956	102.5	252.5	175	197.5
G6AE2	G6AE2	G6AE2	G6AE2	29	29	29	29	100	100	100	100	89.6014	89.6014	89.6014	89.6014	MALE	MALE	MALE	MALE	0.140222	0.0447688	0.0585815	0.112883	59.4664	49.4214	59.0646	31.3404	0.327639	0.39856	0.3444	0.28108	0.00253807	0.00278552	0.00343053	0.00196464	212.5	235	120	397.5
G6AE2	G6AE2	G6AE2	G6AE2	29	29	29	29	100	100	100	100	89.6014	89.6014	89.6014	89.6014	MALE	MALE	MALE	MALE	0.183242	0.0290108	0.0456591	0.130882	64.288	39.7782	63.4844	54.6448	0.470974	0.434734	0.412236	0.4592	0.00331675	0.00180505	0.0026738	0.0022779	165	462.5	220	320
G6AE2	G6AE2	G6AE2	G6AE2	29	29	29	29	100	100	100	100	89.6014	89.6014	89.6014	89.6014	MALE	MALE	MALE	MALE	0.125849	0.0390571	0.0430681	0.13713	28.9296	61.8772	50.6268	53.8412	0.285021	0.470549	0.209635	0.452447	0.0022779	0.00243013	0.00252207	0.00238663	337.5	280	155	300
G6AE2	G6AE2	G6AE2	G6AE2	29	29	29	29	100	100	100	100	89.6014	89.6014	89.6014	89.6014	MALE	MALE	MALE	MALE	0.109077	0.0418542	0.0338819	0.130141	63.8862	55.8502	41.3854	55.8502	0.361961	0.524415	0.327157	0.307715	0.00197433	0.00260417	0.00198413	0.00226501	330	277.5	377.5	260
G6AE2	G6AE2	G6AE2	G6AE2	29	29	29	29	100	100	100	100	89.6014	89.6014	89.6014	97.2356	MALE	MALE	MALE	MALE	0.135079	0.0379057	0.0414982	0.456316	57.8592	17.2774	57.0556	85.5834	0.369707	0.305795	0.29794	0.935338	0.00244499	0.00235849	0.00243013	0.00502513	252.5	367.5	220	107.5
G6AE2	G6AE2	G6AE2	G6AE2	29	29	29	29	100	100	100	100	89.6014	89.6014	89.6014	97.2356	MALE	MALE	MALE	MALE	0.136751	0.0174886	0.0414982	0.500313	50.225	30.9386	58.261	78.351	0.301652	0.338127	0.292769	0.905792	0.00247525	0.00108814	0.00243013	0.00550964	237.5	827.5	212.5	95
G6AE2	G6AE2	G6AE2	G6AE2	29	29	29	29	100	100	100	100	97.2356	97.2356	89.6014	97.2356	MALE	MALE	MALE	MALE	0.455661	0.450933	0.0489298	0.462121	85.1816	82.7708	15.6702	83.9762	0.882711	0.985367	0.2548	0.917773	0.00536193	0.00543478	0.00286533	0.00508906	90	100	287.5	105
G6AE2	G6AE2	G6AE2	G6AE2	29	29	29	29	100	100	100	100	97.2356	97.2356	89.6014	97.2356	MALE	MALE	MALE	MALE	0.432472	0.433273	0.0181375	0.439742	87.5924	86.7888	15.6702	82.369	0.822464	1.00334	0.147138	0.853565	0.00508906	0.00522193	0.00106213	0.00484262	90	105	835	110
G6AE2	G6AE2	G6AE2	G6AE2	29	29	29	29	100	100	100	100	97.2356	97.2356	97.2356	92.0122	MALE	MALE	MALE	MALE	0.416572	0.416943	0.419181	0.160986	90.0032	92.0122	83.5744	67.1006	0.789502	1.0056	0.844186	0.713836	0.00490196	0.00502513	0.00508906	0.00441501	90	107.5	97.5	132.5
G6AE2	G6AE2	G6AE2	G6AE2	29	29	29	29	100	100	100	100	97.2356	97.2356	97.2356	92.0122	MALE	MALE	MALE	MALE	0.455661	0.41177	0.447658	0.170389	81.9672	77.9492	83.5744	75.9402	0.827952	0.901147	0.866056	0.730194	0.00536193	0.00496278	0.00543478	0.0046729	87.5	115	87.5	110
G6AE2	G6AE2	G6AE2	G6AE2	29	29	29	29	100	100	100	100	92.0122	92.0122	97.2356	92.0122	MALE	MALE	MALE	MALE	0.18623	0.228125	0.408779	0.166499	82.7708	79.9582	87.1906	68.306	0.654315	0.787766	0.818691	0.656788	0.0040568	0.0046729	0.00496278	0.00456621	120	112.5	95	115
G6AE2	G6AE2	G6AE2	G6AE2	29	29	29	29	100	100	100	100	92.0122	92.0122	97.2356	92.0122	MALE	MALE	MALE	MALE	0.246143	0.23641	0.413915	0.155826	69.1096	70.7168	85.9852	69.5114	0.735209	0.794571	0.807373	0.637719	0.00536193	0.00484262	0.00502513	0.0042735	92.5	117.5	92.5	125
G6AE2	G6AE2	G6AE2	G6AE2	29	29	29	29	100	100	100	100	92.0122	92.0122	97.2356	92.0122	MALE	MALE	MALE	MALE	0.192074	0.208627	0.413915	0.135551	79.9582	73.9312	74.7348	62.6808	0.644824	0.710877	0.736303	0.4955	0.0041841	0.0042735	0.00502513	0.00371747	115	130	97.5	142.5
G6AE2	G6AE2	G6AE2	G6AE2	29	29	29	29	100	100	100	100	92.0122	92.0122	92.0122	92.0122	MALE	MALE	MALE	MALE	0.212035	0.21088	0.145383	0.0606207	68.7078	65.4934	69.5114	24.5098	0.645144	0.696738	0.623421	0.342794	0.00461894	0.00431965	0.00397614	0.00166251	110	137.5	140	530
G6AE2	G6AE2	G6AE2	G6AE2	29	29	29	29	100	100	100	100	92.0122	92.0122	92.0122	96.432	MALE	MALE	MALE	MALE	0.202674	0.150675	0.168886	0.357931	53.8412	42.189	78.351	75.5384	0.55794	0.448819	0.658412	0.926852	0.00441501	0.00308642	0.00461894	0.00496278	130	230	97.5	120
G6AE2	G6AE2	G6AE2	G6AE2	29	29	29	29	100	100	100	100	92.0122	96.432	92.0122	96.432	MALE	MALE	MALE	MALE	0.0686183	0.406848	0.166958	0.329329	41.3854	80.7618	71.9222	82.369	0.169612	0.882643	0.557536	0.811517	0.00149477	0.00502513	0.00456621	0.00456621	425	107.5	90	117.5
G6AE2	G6AE2	G6AE2	G6AE2	29	29	29	29	100	100	100	100	96.432	96.432	92.0122	96.432	MALE	MALE	MALE	MALE	0.339319	0.387381	0.166958	0.353545	85.1816	83.5744	72.7258	79.1546	0.781483	0.913381	0.586498	0.889378	0.00478469	0.00478469	0.00456621	0.00490196	100	117.5	95	115
G6AE2	G6AE2	G6AE2	G6AE2	29	29	29	29	100	100	100	100	96.432	96.432	92.0122	96.432	MALE	MALE	MALE	MALE	0.335308	0.417334	0.154604	0.381604	85.1816	81.5654	65.4934	78.351	0.763961	0.971017	0.517734	0.905792	0.00472813	0.00515464	0.00422833	0.00529101	100	110	110	102.5
G6AE2	G6AE2	G6AE2	G6AE2	29	29	29	29	100	100	100	100	96.432	96.432	92.0122	96.432	MALE	MALE	MALE	MALE	0.360904	0.406848	0.163231	0.353545	79.9582	81.5654	20.4918	65.8952	0.807659	0.867717	0.3332	0.761794	0.00508906	0.00502513	0.00446429	0.00490196	97.5	105	162.5	117.5
G6AE2	G6AE2	G6AE2	G6AE2	29	29	29	29	100	100	100	100	96.432	91.2086	96.432	91.2086	MALE	MALE	MALE	MALE	0.365555	0.238596	0.3731	0.284965	83.5744	74.7348	81.5654	67.5024	0.8036	0.774454	0.765872	0.665048	0.00515464	0.00441501	0.00484262	0.00472813	90	130	100	110
G6AE2	G6AE2	G6AE2	G6AE2	29	29	29	29	100	100	100	100	96.432	91.2086	96.432	91.2086	MALE	MALE	MALE	MALE	0.365555	0.268199	0.347834	0.302864	61.8772	55.8502	87.5924	55.4484	0.676254	0.664883	0.720925	0.623016	0.00515464	0.00496278	0.00451467	0.00502513	102.5	117.5	100	110
G6AE2	G6AE2	G6AE2	G6AE2	29	29	29	29	100	100	100	100	91.2086	91.2086	96.432	91.2086	MALE	MALE	MALE	MALE	0.156482	0.238596	0.377672	0.263188	69.9132	74.7348	82.369	67.1006	0.672242	0.718604	0.773418	0.588602	0.0040568	0.00441501	0.00490196	0.00436681	142.5	122.5	97.5	115
G6AE2	G6AE2	G6AE2	G6AE2	29	29	29	29	100	100	100	100	91.2086	91.2086	96.432	91.2086	MALE	MALE	MALE	MALE	0.193833	0.13133	0.382358	0.0754318	61.8772	34.5548	82.369	33.3494	0.676254	0.423985	0.79201	0.466425	0.00502513	0.00243013	0.00496278	0.00125156	107.5	330	97.5	727.5
G6AE2	G6AE2	G6AE2	G6AE2	29	29	29	29	100	100	100	100	91.2086	91.2086	96.432	91.2086	MALE	MALE	MALE	MALE	0.158085	0.0823185	0.43042	0.187465	75.1366	64.288	69.5114	59.8682	0.582454	0.589798	0.739483	0.455271	0.00409836	0.00152323	0.00558659	0.00311042	115	547.5	85	190
G6AE2	G6AE2	G6AE2	G6AE2	29	29	29	29	100	100	100	100	91.2086	91.2086	91.2086	91.2086	MALE	MALE	MALE	MALE	0.212522	0.172109	0.233005	0.186019	53.4394	50.225	65.8952	59.0646	0.568504	0.548907	0.633608	0.44916	0.00550964	0.00318471	0.00484262	0.00308642	87.5	222.5	102.5	192.5
G6AE2	G6AE2	G6AE2	G6AE2	29	29	29	29	100	100	100	100	91.2086	91.2086	91.2086	96.0302	MALE	MALE	MALE	MALE	0.0457024	0.166797	0.233005	0.205991	50.225	52.6358	62.279	47.8142	0.297189	0.518579	0.584779	0.482972	0.00118483	0.00308642	0.00484262	0.00389864	675	222.5	100	157.5
G6AE2	G6AE2	G6AE2	G6AE2	29	29	29	29	100	100	100	100	91.2086	96.0302	91.2086	96.0302	MALE	MALE	MALE	MALE	0.13347	0.326519	0.219706	0.233275	54.243	62.6808	71.5204	35.7602	0.390237	0.633139	0.671553	0.558753	0.00346021	0.00451467	0.00456621	0.00441501	150	122.5	112.5	162.5
G6AE2	G6AE2	G6AE2	G6AE2	29	29	29	29	100	100	100	100	91.2086	96.0302	91.2086	96.0302	MALE	MALE	MALE	MALE	0.129006	0.273955	0.222243	0.0860533	57.0556	43.3944	24.9116	28.9296	0.500488	0.549296	0.374611	0.452025	0.00334448	0.00378788	0.00461894	0.00162866	185	185	150	550
G6AE2	G6AE2	G6AE2	G6AE2	29	29	29	29	100	100	100	100	91.2086	96.0302	91.2086	96.0302	MALE	MALE	MALE	MALE	0.116358	0.271385	0.0568406	0.233275	27.7242	16.4738	62.6808	71.9222	0.362408	0.374405	0.4955	0.708593	0.00301659	0.00375235	0.00118133	0.00441501	255	222.5	720	125
G6AE2	G6AE2	G6AE2	G6AE2	29	29	29	29	100	100	100	100	96.0302	96.0302	91.2086	96.0302	MALE	MALE	MALE	MALE	0.265207	0.126	0.138862	0.241263	40.18	61.8772	61.0736	73.9312	0.542973	0.715343	0.396582	0.710877	0.0046729	0.00174216	0.002886	0.00456621	140	487.5	192.5	115
G6AE2	G6AE2	G6AE2	G6AE2	29	29	29	29	100	100	100	100	96.0302	96.0302	91.2086	96.0302	MALE	MALE	MALE	MALE	0.225663	0.337963	0.175604	0.235878	36.9656	76.7438	34.153	46.6088	0.555874	0.816423	0.31333	0.554867	0.00397614	0.0046729	0.00364964	0.00446429	185	120	165	140
G6AE2	G6AE2	G6AE2	G6AE2	29	29	29	29	100	100	100	100	96.0302	96.0302	96.0302	96.0302	MALE	MALE	MALE	MALE	0.0871132	0.368061	0.305205	0.123884	49.4214	68.7254	54.243	49.4214	0.306015	0.485692	0.509324	0.555297	0.00153492	0.00508906	0.00451467	0.00234467	490	55	115	337.5
G6AE2	G6AE2	G6AE2	G6AE2	29	29	29	29	100	100	100	101	96.0302	96.0302	96.0302	92.0122	MALE	MALE	MALE	MALE	0.245159	0.250256	0.285847	0.279775	76.342	34.5548	39.3764	66.6988	0.628329	0.500794	0.570672	0.691179	0.00431965	0.00346021	0.00422833	0.00461894	110	220	167.5	120
G6AE2	G6AE2	G6AE2	G6AE2	29	29	29	29	100	100	100	101	96.0302	96.0302	96.0302	92.0122	MALE	MALE	MALE	MALE	0.296367	0.185923	0.277061	0.276582	62.6808	75.9402	21.2954	65.4934	0.649542	0.730194	0.332741	0.678688	0.00522193	0.00257069	0.00409836	0.00456621	95	285	180	122.5
G6AE2	G6AE2	G6AE2	G6AE2	29	29	29	29	100	101	100	101	96.0302	92.0122	96.0302	92.0122	MALE	MALE	MALE	MALE	0.247835	0.280203	0.107051	0.243258	55.8502	65.4934	75.1366	34.9566	0.489914	0.715775	0.60594	0.488903	0.00436681	0.00478469	0.00158353	0.00401606	115	117.5	507.5	177.5
G6AE2	G6AE2	G6AE2	G6AE2	29	29	29	29	100	101	100	101	96.0302	92.0122	96.0302	92.0122	MALE	MALE	MALE	MALE	0.126401	0.270496	0.315901	0.157738	59.4664	62.279	72.7258	49.4214	0.379977	0.76416	0.637946	0.512139	0.00222717	0.00461894	0.0046729	0.00260417	292.5	135	100	287.5
G6AE2	G6AE2	G6AE2	G6AE2	29	29	29	29	101	101	100	101	92.0122	92.0122	96.0302	92.0122	MALE	MALE	MALE	MALE	0.253538	0.26439	0.357687	0.256116	65.8952	61.8772	53.8412	43.3944	0.682852	0.658268	0.588428	0.438327	0.00436681	0.00451467	0.00529101	0.00422833	132.5	127.5	97.5	137.5
G6AE2	G6AE2	G6AE2	G6AE2	29	29	29	29	101	101	100	101	92.0122	92.0122	96.0302	92.0122	MALE	MALE	MALE	MALE	0.299279	0.171486	0.282857	0.207792	64.6898	35.7602	29.3314	55.8502	0.706992	0.500143	0.359894	0.578759	0.00515464	0.00292826	0.0041841	0.00343053	102.5	270	157.5	195
G6AE2	G6AE2	G6AE2	G6AE2	29	29	29	29	101	101	100	101	92.0122	92.0122	96.0302	99.6464	MALE	MALE	MALE	MALE	0.268176	0.199192	0.43898	0.494567	63.8862	55.0466	17.6792	77.1456	0.69821	0.696792	0.25622	1.04251	0.00461894	0.00340136	0.00649351	0.00566572	125	215	85	102.5
G6AE2	G6AE2	G6AE2	G6AE2	29	29	29	29	101	101	100	101	92.0122	92.0122	96.0302	99.6464	MALE	MALE	MALE	MALE	0.2508	0.221827	0.218779	0.516515	36.9656	48.6178	65.8952	94.8248	0.535733	0.656997	0.590988	1.03634	0.00431965	0.00378788	0.00323625	0.00591716	162.5	190	197.5	77.5
G6AE2	G6AE2	G6AE2	G6AE2	29	29	29	29	101	101	101	101	92.0122	92.0122	92.0122	99.6464	MALE	MALE	MALE	MALE	0.136132	0.2009	0.256955	0.524271	63.4844	56.6538	70.7168	87.5924	0.433341	0.63656	0.634231	1.07475	0.00234467	0.00343053	0.00446429	0.00600601	280	202.5	112.5	85
G6AE2	G6AE2	G6AE2	G6AE2	29	29	29	29	101	101	101	101	92.0122	99.6464	92.0122	99.6464	MALE	MALE	MALE	MALE	0.211898	0.542942	0.254119	0.524271	50.6268	94.423	67.5024	83.1726	0.425435	1.12408	0.57942	1.02052	0.00364964	0.00566572	0.00441501	0.00600601	155	92.5	110	85
G6AE2	G6AE2	G6AE2	G6AE2	29	29	29	29	101	101	101	101	92.0122	99.6464	92.0122	92.0122	MALE	MALE	MALE	MALE	0.228583	0.575551	0.330792	0.263432	59.8682	95.2266	41.3854	59.8682	0.473266	1.10089	0.559262	0.575656	0.00393701	0.00600601	0.00574713	0.00441501	127.5	80	100	122.5
G6AE2	G6AE2	G6AE2	G6AE2	29	29	29	29	101	101	101	101	99.6464	99.6464	92.0122	92.0122	MALE	MALE	MALE	MALE	0.459344	0.612328	0.147019	0.206461	95.2266	81.9672	51.8322	34.153	0.91564	1.14639	0.293667	0.461527	0.00502513	0.00638978	0.00255428	0.00346021	95	85	215	215
G6AE2	G6AE2	G6AE2	G6AE2	29	29	29	29	101	101	101	101	99.6464	99.6464	92.0122	92.0122	MALE	MALE	MALE	MALE	0.557375	0.500414	0.192501	0.0559468	96.0302	89.1996	53.4394	42.189	0.995132	0.901006	0.468767	0.405663	0.00609756	0.00522193	0.00334448	0.000937647	67.5	92.5	185	962.5
G6AE2	G6AE2	G6AE2	G6AE2	29	29	29	29	101	101	101	101	99.6464	92.0122	92.0122	92.0122	MALE	MALE	MALE	MALE	0.574903	0.253701	0.210065	0.249654	86.7888	51.8322	56.252	72.7258	1.00334	0.635978	0.44468	0.699287	0.00628931	0.0042735	0.00364964	0.0041841	72.5	152.5	147.5	135
G6AE2	G6AE2	G6AE2	G6AE2	29	29	29	29	101	101	101	101	99.6464	92.0122	92.0122	92.0122	MALE	MALE	MALE	MALE	0.517901	0.0769487	0.206301	0.252293	92.0122	31.3404	47.4124	59.4664	0.929416	0.342518	0.360551	0.616232	0.00566572	0.00129618	0.00358423	0.00422833	77.5	680	147.5	140
G6AE2	G6AE2	G6AE2	G6AE2	29	29	29	29	101	101	101	101	92.0122	92.0122	99.6464	92.0122	MALE	MALE	MALE	MALE	0.291994	0.0986965	0.491152	0.206461	55.0466	67.1006	97.6374	48.6178	0.570431	0.713836	1.01179	0.546267	0.00490196	0.00166251	0.00566572	0.00346021	107.5	507.5	80	200
G6AE2	G6AE2	G6AE2	G6AE2	29	29	29	29	101	101	101	101	92.0122	92.0122	99.6464	92.0122	MALE	MALE	MALE	MALE	0.239224	0.274208	0.528588	0.208263	37.7692	65.0916	90.0032	54.6448	0.4018	0.657491	1.01127	0.525431	0.00401606	0.00461894	0.00609756	0.0034904	155	117.5	75	182.5
G6AE2	G6AE2	G6AE2	G6AE2	29	29	29	29	101	101	101	101	92.0122	92.0122	99.6464	89.6014	MALE	MALE	MALE	MALE	0.131205	0.233724	0.520651	0.110256	19.2864	53.4394	88.7978	55.8502	0.185446	0.553776	0.944657	0.387849	0.00220264	0.00393701	0.00600601	0.00263852	350	157.5	72.5	235
G6AE2	G6AE2	G6AE2	G6AE2	29	29	29	29	101	101	101	101	92.0122	92.0122	99.6464	89.6014	MALE	MALE	MALE	MALE	0.148361	0.203657	0.498209	0.110256	13.6612	59.4664	84.378	41.7872	0.293789	0.616232	0.897638	0.358688	0.00249066	0.00343053	0.00574713	0.00263852	355	195	80	262.5
G6AE2	G6AE2	G6AE2	G6AE2	29	29	29	29	101	101	101	101	92.0122	89.6014	92.0122	89.6014	MALE	MALE	MALE	MALE	0.191226	0.088677	0.206383	0.120598	32.9476	48.031	63.8862	58.6628	0.295494	0.461837	0.586112	0.526124	0.00321027	0.00189036	0.00389864	0.002886	200	425	147.5	235
G6AE2	G6AE2	G6AE2	G6AE2	29	29	29	29	101	101	101	101	92.0122	89.6014	92.0122	89.6014	MALE	MALE	MALE	MALE	0.303139	0.119822	0.216956	0.162913	69.5114	55.8502	53.8412	54.6448	0.609749	0.469329	0.443137	0.631732	0.00508906	0.00255428	0.00409836	0.00389864	82.5	272.5	122.5	170
G6AE2	G6AE2	G6AE2	G6AE2	29	29	29	29	101	101	101	101	92.0122	89.6014	92.0122	89.6014	MALE	MALE	MALE	MALE	0.268925	0.122162	0.073883	0.18655	57.4574	48.6178	35.3584	57.4574	0.504012	0.596537	0.332004	0.595413	0.00451467	0.00260417	0.00139567	0.00446429	107.5	302.5	610	127.5
G6AE2	G6AE2	G6AE2	G6AE2	29	29	29	29	101	101	101	101	92.0122	89.6014	92.0122	89.6014	MALE	MALE	MALE	MALE	0.191226	0.169657	0.0812543	0.190809	62.279	55.8502	70.315	36.5638	0.432493	0.645667	0.660235	0.462833	0.00321027	0.00361664	0.00153492	0.00456621	167.5	190	545	140
G6AE2	G6AE2	G6AE2	G6AE2	29	29	29	29	101	101	101	101	92.0122	89.6014	92.0122	89.6014	MALE	MALE	MALE	MALE	0.207912	0.200471	0.256354	0.184491	58.6628	61.4754	63.8862	36.5638	0.39371	0.73185	0.61429	0.462833	0.0034904	0.0042735	0.00484262	0.00441501	137.5	150	102.5	147.5
G6AE2	G6AE2	G6AE2	G6AE2	29	29	29	29	101	101	101	101	89.6014	89.6014	92.0122	87.9942	MALE	MALE	MALE	MALE	0.0528611	0.216675	0.181603	0.323389	47.0106	45.8052	54.243	66.297	0.255492	0.579813	0.35804	0.724557	0.00138122	0.00461894	0.00343053	0.00461894	540	137.5	140	125
G6AE2	G6AE2	G6AE2	G6AE2	29	29	29	29	101	101	101	101	89.6014	89.6014	92.0122	87.9942	MALE	MALE	MALE	MALE	0.100318	0.204848	0.214755	0.343204	63.0826	45.4034	55.8502	53.8412	0.362544	0.682758	0.537021	0.640967	0.00262123	0.00436681	0.0040568	0.00490196	207.5	162.5	142.5	120
G6AE2	G6AE2	G6AE2	G6AE2	29	29	29	29	101	101	101	101	89.6014	87.9942	89.6014	87.9942	MALE	MALE	MALE	MALE	0.0871787	0.0920792	0.082434	0.188462	48.216	70.315	60.6718	35.3584	0.242291	0.748032	0.400474	0.552475	0.0022779	0.00490196	0.00174978	0.00269179	240	110	420	307.5
G6AE2	G6AE2	G6AE2	G6AE2	29	29	29	29	101	101	101	101	89.6014	87.9942	89.6014	87.9942	MALE	MALE	MALE	MALE	0.132427	0.0867628	0.121108	0.343204	64.288	41.3854	54.243	83.5744	0.488882	0.559262	0.325784	0.866056	0.00346021	0.00461894	0.00257069	0.00490196	157.5	142.5	222.5	107.5
G6AE2	G6AE2	G6AE2	G6AE2	29	29	29	29	101	101	101	101	89.6014	87.9942	89.6014	87.9942	MALE	MALE	MALE	MALE	0.138414	0.0516048	0.121108	0.380509	60.27	57.4574	54.6448	60.27	0.528684	0.727309	0.501328	0.7175	0.00361664	0.00274725	0.00257069	0.00543478	162.5	285	280	100
G6AE2	G6AE2	G6AE2	G6AE2	29	29	29	29	101	101	101	101	89.6014	87.9942	89.6014	87.9942	MALE	MALE	MALE	MALE	0.202494	0.0980896	0.164436	0.299204	50.6268	81.1636	58.6628	31.7422	0.56884	0.799641	0.463738	0.495972	0.00529101	0.00522193	0.0034904	0.0042735	100	90	160	170
G6AE2	G6AE2	G6AE2	G6AE2	29	29	29	29	101	101	101	101	89.6014	87.9942	89.6014	87.9942	MALE	MALE	MALE	MALE	0.149206	0.106426	0.195077	0.0973764	46.207	43.7962	62.279	60.6718	0.433869	0.554382	0.558556	0.645445	0.00389864	0.00566572	0.00414079	0.00139082	150	97.5	130	625
G6AE2	G6AE2	G6AE2	G6AE2	29	29	29	29	101	101	101	101	89.6014	87.9942	89.6014	85.5834	MALE	MALE	MALE	MALE	0.205209	0.0495624	0.222747	0.173505	28.126	22.5008	39.3764	55.9335	0.422947	0.314697	0.418898	0.537822	0.00536193	0.00263852	0.00472813	0.0031348	120	307.5	117.5	215
G6AE2	G6AE2	G6AE2	G6AE2	29	29	29	29	101	101	101	101	87.9942	87.9942	89.6014	85.5834	MALE	MALE	MALE	MALE	0.283437	0.0516048	0.203503	0.193187	71.1186	30.135	49.0196	57.8592	0.73698	0.49	0.482952	0.599577	0.00451467	0.00274725	0.00431965	0.0034904	125	302.5	130	190
G6AE2	G6AE2	G6AE2	G6AE2	29	29	29	29	101	101	101	101	87.9942	85.5834	87.9942	85.5834	MALE	MALE	MALE	MALE	0.336629	0.11284	0.0883314	0.215781	48.6178	68.7078	60.6718	56.252	0.615415	0.224169	0.681706	0.554207	0.00536193	0.00220264	0.00536193	0.00389864	107.5	147.5	97.5	155
G6AE2	G6AE2	G6AE2	G6AE2	29	29	29	29	101	101	101	101	87.9942	85.5834	87.9942	85.5834	MALE	MALE	MALE	MALE	0.286672	0.38231	0.078822	0.209651	16.072	63.0826	38.5728	47.8142	0.365273	0.689427	0.53948	0.537238	0.00456621	0.00746269	0.00478469	0.00378788	175	42.5	137.5	175
G6AE2	G6AE2	G6AE2	G6AE2	29	29	29	29	101	101	101	101	87.9942	85.5834	87.9942	85.5834	MALE	MALE	MALE	MALE	0.323615	0.201691	0.0407767	0.17912	33.7512	54.243	81.1636	36.5638	0.359055	0.59282	0.668013	0.360234	0.00515464	0.00393701	0.00247525	0.00323625	100	162.5	282.5	207.5
G6AE2	G6AE2	G6AE2	G6AE2	29	29	29	29	101	101	101	101	87.9942	85.5834	87.9942	85.5834	MALE	MALE	MALE	MALE	0.336629	0.192231	0.103609	0.119284	74.7348	47.4124	66.297	38.5728	0.816774	0.478913	0.74491	0.263296	0.00536193	0.00375235	0.00628931	0.00215517	95	167.5	70	317.5
G6AE2	G6AE2	G6AE2	G6AE2	29	29	29	29	101	101	101	101	87.9942	85.5834	87.9942	85.5834	MALE	MALE	MALE	MALE	0.377065	0.134284	0.0778903	0.157462	55.0466	42.5908	42.3033	54.243	0.696792	0.478548	0.416782	0.486484	0.00600601	0.00262123	0.00472813	0.00284495	87.5	292.5	110	240
G6AE2	G6AE2	G6AE2	G6AE2	29	29	29	29	101	101	101	101	87.9942	85.5834	87.9942	85.9852	MALE	MALE	MALE	MALE	0.26546	0.111611	0.0524643	0.134127	36.5638	46.6088	26.9206	52.6358	0.410829	0.509386	0.420634	0.531675	0.00422833	0.00217865	0.00318471	0.003861	147.5	367.5	250	160
G6AE2	G6AE2	G6AE2	G6AE2	29	29	29	29	101	101	101	101	87.9942	85.5834	87.9942	85.9852	MALE	MALE	MALE	MALE	0.435981	0.165791	0.041548	0.139514	16.8756	46.207	35.7602	57.0556	0.312511	0.491564	0.257268	0.641074	0.00694444	0.00323625	0.00252207	0.00401606	90	215	257.5	160
G6AE2	G6AE2	G6AE2	G6AE2	29	29	29	29	101	101	101	101	87.9942	85.9852	85.5834	85.9852	MALE	MALE	MALE	MALE	0.104374	0.0966623	0.221287	0.138127	63.0826	58.261		53.8412	0.541482	0.693583		0.55794	0.00166251	0.00301659	0.00422833	0.00397614	485	247.5	187.5	155
G6AE2	G6AE2	G6AE2	G6AE2	29	29	29	29	101	101	101	101	85.5834	85.9852	85.5834	85.9852	MALE	MALE	MALE	MALE	0.157713	0.118024	0.14477	0.138127	61.0736	55.8502	65.0916	44.5998	0.439378	0.610385	0.460011	0.515605	0.00318471	0.00368324	0.00276625	0.00397614	175	180	220	165
G6AE2	G6AE2	G6AE2	G6AE2	29	29	29	29	101	101	101	101	85.5834	85.9852	85.5834	85.9852	MALE	MALE	MALE	MALE	0.168442	0.134073	0.172153	0.142373	61.4754	53.0376	59.4664	52.6358	0.458772	0.613151	0.46098	0.626617	0.00340136	0.0041841	0.00328947	0.00409836	160	152.5	175	160
G6AE2	G6AE2	G6AE2	G6AE2	29	29	29	29	101	101	101	101	85.5834	85.9852	85.5834	85.9852	MALE	MALE	MALE	MALE	0.223575	0.131326	0.185913	0.166215	51.4304	47.8142	63.8862	67.5024	0.506703	0.586677	0.495242	0.633825	0.00451467	0.00409836	0.0035524	0.00478469	120	162.5	152.5	102.5
G6AE2	G6AE2	G6AE2	G6AE2	29	29	29	29	101	101	101	101	85.5834	85.9852	85.5834	85.9852	MALE	MALE	MALE	MALE	0.202958	0.12741	0.210179	0.139514	47.0106	49.8232	50.225	28.4608	0.528209	0.611328	0.413374	0.349213	0.00409836	0.00397614	0.00401606	0.00401606	155	170	127.5	167.5
G6AE2	G6AE2	G6AE2	G6AE2	29	29	29	29	101	101	101	101	85.5834	85.9852	85.5834	63.4844	MALE	MALE	MALE	MALE	0.155241	0.141473	0.231057	0.33416	44.5998	64.288	36.5638	62.6808	0.359676	0.702601	0.462833	0.724634	0.0031348	0.00441501	0.00441501	0.00502513	195	135	147.5	112.5
G6AE2	G6AE2	G6AE2	G6AE2	29	29	29	29	101	101	101	101	85.5834	85.9852	85.5834	63.4844	MALE	MALE	MALE	MALE	0.0923054	0.138417	0.131164	0.310738	44.5998	51.4304	44.198	58.6628	0.173878	0.612267	0.296631	0.659133	0.00186393	0.00431965	0.00250627	0.0046729	280	147.5	250	125
G6AE2	G6AE2	G6AE2	G6AE2	29	29	29	29	101	101	101	101	85.5834	85.9852	85.5834	63.4844	MALE	MALE	MALE	MALE	0.182401	0.0642155	0.11041	0.314411	50.225	28.5278	52.6358	71.5204	0.44057	0.483522	0.442318	0.722428	0.00368324	0.00200401	0.0021097	0.00472813	157.5	440	355	112.5
G6AE2	G6AE2	G6AE2	G6AE2	29	29	29	29	101	101	101	101	85.9852	63.4844	85.5834	63.4844	MALE	MALE	MALE	MALE	0.0787175	0.257893	0.161526	0.351841		63.8862	46.207	43.3944		0.67964	0.320882	0.586411	0.00199402	0.00472813	0.00308642	0.00529101	357.5	117.5	180	115
G6AE2	G6AE2	G6AE2	G6AE2	29	29	29	29	101	101	101	101	85.9852	63.4844	85.9852	63.4844	MALE	MALE	MALE	MALE	0.140237	0.257893	0.126055	0.114356	58.6628	65.4934	59.4664	47.0106	0.437782	0.735881	0.499718	0.635278	0.0035524	0.00472813	0.00301659	0.00171969	147.5	122.5	212.5	507.5
G6AE2	G6AE2	G6AE2	G6AE2	29	29	29	29	101	101	101	101	85.9852	63.4844	85.9852	63.4844	MALE	MALE	MALE	MALE	0.174291	0.267374	0.155343	0.318172	54.6448	66.297	56.252	62.6808	0.581328	0.74491	0.493439	0.685036	0.00441501	0.00490196	0.00371747	0.00478469	132.5	115	155	117.5
G6AE2	G6AE2	G6AE2	G6AE2	29	29	29	29	101	101	101	101	85.9852	63.4844	85.9852	81.9672	MALE	MALE	MALE	MALE	0.160149	0.100265	0.173032	0.404376	60.27	38.5728	57.4574	68.306	0.593793	0.580042	0.482835	0.626661	0.0040568	0.00183824	0.00414079	0.0042735	145	477.5	122.5	125
G6AE2	G6AE2	G6AE2	G6AE2	29	29	29	29	101	101	101	101	85.9852	63.4844	85.9852	81.9672	MALE	MALE	MALE	MALE	0.139003	0.233096	0.158285	0.49412	51.0286	69.1096	50.6268	32.144	0.468152	0.716162	0.384995	0.434378	0.00352113	0.0042735	0.00378788	0.00522193	175	137.5	132.5	117.5
G6AE2	G6AE2	G6AE2	G6AE2	29	29	29	29	101	101	101	101	85.9852	63.4844	85.9852	81.9672	MALE	MALE	MALE	MALE	0.166921	0.257893	0.17669	0.14524	63.4844	57.8592	50.6268	55.0466	0.569367	0.615523	0.498786	0.636377	0.00422833	0.00472813	0.00422833	0.00153492	125	117.5	135	565
G6AE2	G6AE2	G6AE2	G6AE2	29	29	29	29	101	101	101	101	85.9852	81.9672	85.9852	81.9672	MALE	MALE	MALE	MALE	0.233591	0.16703	0.184491	0.404376	53.4394	67.1006	69.9132	42.189	0.676448	0.66109	0.627024	0.448819	0.00591716	0.00461894	0.00441501	0.0042735	90	115	115	140
G6AE2	G6AE2	G6AE2	G6AE2	29	29	29	29	101	101	101	101	85.9852	81.9672	85.9852	81.9672	MALE	MALE	MALE	MALE	0.165175	0.0579519	0.22406	0.2692	24.108	28.5278	36.162	34.5548	0.362526	0.483522	0.384702	0.500794	0.0041841	0.00160256	0.00536193	0.00284495	172.5	565	92.5	282.5
G6AE2	G6AE2	G6AE2	G6AE2	29	29	29	29	101	101	101	101	63.4844	81.9672	85.9852	81.9672	MALE	MALE	MALE	MALE	0.167104	0.156207	0.0740908	0.422428	68.7078	61.8772	22.9026	69.5114	0.645144	0.658268	0.250302	0.668379	0.0046729	0.00431965	0.00177305	0.00446429	107.5	137.5	472.5	120
G6AE2	G6AE2	G6AE2	G6AE2	29	29	29	29	101	101	101	101	63.4844	81.9672	63.4844	81.9672	MALE	MALE	MALE	MALE	0.163289	0.103616	0.244513	0.0899894	66.297	32.5458	66.297	76.7438	0.594592	0.425435	0.653172	0.704072	0.00456621	0.00286533	0.00461894	0.000951022	107.5	272.5	115	942.5
G6AE2	G6AE2	G6AE2	G6AE2	29	29	29	29	101	101	101	101	63.4844	81.9672	63.4844	93.2176	MALE	MALE	MALE	MALE	0.184331	0.143785	0.24737	0.256798	65.0916	62.6808	64.6898	77.9492	0.674524	0.666817	0.567454	0.851904	0.00515464	0.00397614	0.0046729	0.00550964	97.5	157.5	100	90
G6AE2	G6AE2	G6AE2	G6AE2	29	29	29	29	101	101	101	101	63.4844	81.9672	63.4844	93.2176	MALE	MALE	MALE	MALE	0.214776	0.181719	0.241722	0.260384	36.9656	45.0016	71.5204	74.7348	0.601067	0.588256	0.65615	0.816774	0.00600601	0.00502513	0.00456621	0.00558659	105	122.5	110	87.5
G6AE2	G6AE2	G6AE2	G6AE2	29	29	29	29	101	101	101	101	63.4844	81.9672	63.4844	93.2176	MALE	MALE	MALE	MALE	0.0568525	0.0819071	0.313238	0.264073	75.1366	25.7152	50.225	65.8952	0.571381	0.5248	0.635759	0.80853	0.00158983	0.00226501	0.00591716	0.00566572	497.5	392.5	90	95
G6AE2	G6AE2	G6AE2	G6AE2	29	29	29	29	101	101	101	101	63.4844	81.9672	63.4844	93.2176	MALE	MALE	MALE	MALE	0.191744	0.0900672	0.0898763	0.215283	56.6538	38.9746	28.126	69.5114	0.587086	0.586084	0.307388	0.668379	0.00536193	0.00249066	0.00169779	0.00461894	90	335	497.5	112.5
G6AE2	G6AE2	G6AE2	G6AE2	29	29	29	29	101	101	101	101	63.4844	93.2176	63.4844	93.2176	MALE	MALE	MALE	MALE	0.189207	0.284812	0.256354	0.185323	24.9116	77.9492	63.4844	39.7782	0.5084	0.927967	0.657869	0.576496	0.00529101	0.00609756	0.00484262	0.00397614	140	80	110	182.5
G6AE2	G6AE2	G6AE2	G6AE2	29	29	29	29	101	101	101	102	81.9672	93.2176	63.4844	97.2356	MALE	MALE	MALE	MALE	0.287199	0.257351	0.280091	0.44866	65.8952	79.9582	40.9836	76.7438	0.618734	0.924372	0.502866	0.913617	0.00461894	0.00550964	0.00529101	0.00496278	110	95	107.5	117.5
G6AE2	G6AE2	G6AE2	G6AE2	29	29	29	29	101	101	101	102	81.9672	93.2176	81.9672	97.2356	MALE	MALE	MALE	MALE	0.347366	0.257351	0.262369	0.491332	34.5548	74.7348		85.1816	0.500794	0.8897		0.930946	0.00558659	0.00550964	0.00746269	0.00543478	110	97.5	60	92.5
G6AE2	G6AE2	G6AE2	G6AE2	29	29	29	29	101	101	101	102	81.9672	93.2176	81.9672	97.2356	MALE	MALE	MALE	MALE	0.0909043	0.243913	0.131923	0.478333	67.5024	70.7168	65.4934	82.7708	0.555575	0.772861	0.53904	0.930009	0.00146199	0.00522193	0.00375235	0.00529101	562.5	100	145	100
G6AE2	G6AE2	G6AE2	G6AE2	29	29	29	29	101	101	101	102	81.9672	93.2176	81.9672	96.432	MALE	MALE	MALE	MALE	0.280716	0.208523	0.205	0.512623	36.5638	59.8682	49.8232	84.378	0.360234	0.636896	0.611328	0.897638	0.00451467	0.00446429	0.0058309	0.00543478	120	130	90	90
G6AE2	G6AE2	G6AE2	G6AE2	29	29	29	29	101	101	101	102	81.9672	93.2176	81.9672	96.432	MALE	MALE	MALE	MALE	0.161923	0.153649	0.052948	0.480013	62.279	45.4034	47.0106	87.5924	0.473605	0.635013	0.371625	0.931834	0.00260417	0.00328947	0.00150602	0.00508906	252.5	232.5	537.5	102.5
G6AE2	G6AE2	G6AE2	G6AE2	29	29	29	29	101	102	101	102	81.9672	97.2356	81.9672	96.432	MALE	MALE	MALE	MALE	0.342582	0.429025	0.170254	0.526942	47.8142	74.333	48.216	83.5744	0.586677	0.859341	0.591607	0.889089	0.00550964	0.0046729	0.00484262	0.00558659	100	127.5	125	85
G6AE2	G6AE2	G6AE2	G6AE2	29	29	29	29	101	102	101	102	81.9672	97.2356	81.9672	96.432	MALE	MALE	MALE	MALE	0.337927	0.485774	0.118575	0.492546	12.054	87.9942	27.7242	90.0032	0.246	0.911857	0.4018	0.886731	0.00543478	0.00529101	0.00337268	0.00522193	135	92.5	227.5	90
G6AE2	G6AE2	G6AE2	G6AE2	29	29	29	29	101	102	101	102	81.9672	97.2356	81.9672	94.8248	MALE	MALE	MALE	MALE	0.165149	0.485774	0.111082	0.281202	17.6792	89.1996	70.7168	53.4394	0.561244	0.948932	0.634231	0.676448	0.00265604	0.00529101	0.00315956	0.002886	345	95	205	267.5
G6AE2	G6AE2	G6AE2	G6AE2	29	29	29	29	101	102	101	102	81.9672	97.2356	81.9672	94.8248	MALE	MALE	MALE	MALE	0.235525	0.461363	0.205	0.483556	20.09	89.1996	26.9206	70.7168	0.22573	0.901006	0.437733	0.772861	0.00378788	0.00502513	0.0058309	0.00496278	175	100	110	110
G6AE2	G6AE2	G6AE2	G6AE2	29	29	29	29	101	102	101	102	81.9672	96.432	81.9672	94.8248	MALE	MALE	MALE	MALE	0.25483	0.470361	0.0733977	0.515537	61.8772	84.378	29.3314	62.279	0.594973	0.948067	0.931156	0.814105	0.00409836	0.00529101	0.00208768	0.00529101	140	100	447.5	112.5
G6AE2	G6AE2	G6AE2	G6AE2	29	29	29	29	101	102	101	102	93.2176	96.432	81.9672	94.8248	MALE	MALE	MALE	MALE	0.288599	0.483143	0.088114	0.50225	81.1636	90.8068	61.8772	86.7888	0.887034	1.08103	0.40843	0.948511	0.00619195	0.00543478	0.00250627	0.00515464	70	100	247.5	102.5
G6AE2	G6AE2	G6AE2	G6AE2	29	29	29	29	101	102	101	102	93.2176	96.432	93.2176	94.8248	MALE	MALE	MALE	MALE	0.267867	0.464221	0.258214	0.55998	79.9582	89.6014	79.1546	88.7978	0.850619	1.06668	0.865078	0.920184	0.00574713	0.00522193	0.00600601	0.00574713	80	107.5	75	77.5
G6AE2	G6AE2	G6AE2	G6AE2	29	29	29	29	101	102	101	102	93.2176	96.432	93.2176	96.432	MALE	MALE	MALE	MALE	0.267867	0.452408	0.236874	0.2952	75.5384	85.9852	78.7528	41.7872	0.825556	0.939729	0.816091	0.564692	0.00574713	0.00508906	0.00550964	0.00340136	82.5	105	85	220
G6AE2	G6AE2	G6AE2	G6AE2	29	29	29	29	101	102	101	102	93.2176	94.8248	93.2176	96.432	MALE	MALE	MALE	MALE	0.246607	0.271969	0.247084	0.447365	76.7438	81.1636	68.306	78.7528	0.795273	0.863443	0.789665	0.996871	0.00529101	0.00306279	0.00574713	0.00515464	92.5	232.5	87.5	115
G6AE2	G6AE2	G6AE2	G6AE2	29	29	29	29	101	102	101	102	93.2176	94.8248	93.2176	96.432	MALE	MALE	MALE	MALE	0.264073	0.463696	0.216043	0.537392	57.4574	65.8952	71.9222	75.9402	0.8036	0.80853	0.659837	0.961268	0.00566572	0.00522193	0.00502513	0.00619195	105	110	90	82.5
G6AE2	G6AE2	G6AE2	G6AE2	29	29	29	29	101	102	101	102	93.2176	94.8248	93.2176	96.432	MALE	MALE	MALE	MALE	0.208075	0.44622	0.233655	0.513543	35.3584	78.351	44.5998	66.297	0.599295	0.961362	0.547237	0.895905	0.00446429	0.00502513	0.00543478	0.00591716	165	117.5	102.5	95
G6AE2	G6AE2	G6AE2	G6AE2	29	29	29	29	101	102	101	102	93.2176	94.8248	93.2176	96.432	MALE	MALE	MALE	MALE	0.152068	0.489244	0.145	0.506057	34.153	96.432	37.7692	80.36	0.604478	1.02587	0.463426	0.986012	0.00326264	0.00550964	0.00337268	0.0058309	250	87.5	215	90
G6AE2	G6AE2	G6AE2	G6AE2	29	29	29	29	102	102	102	102	97.2356	94.8248	97.2356	94.423	MALE	MALE	MALE	MALE	0.514702	0.549832	0.424071	0.226438	71.5204	87.1906	79.9582	51.8322	0.8036	1.03798	0.733561	0.537121	0.00550964	0.00619195	0.00461894	0.00282486	92.5	77.5	107.5	257.5
G6AE2	G6AE2	G6AE2	G6AE2	29	29	29	29	102	102	102	102	97.2356	96.432	97.2356	94.423	MALE	MALE	MALE	MALE	0.426568	0.28582	0.485774	0.34626	89.1996	65.0916	89.6014	66.297	0.878814	0.879616	0.841328	0.766439	0.00456621	0.00328947	0.00529101	0.00431965	117.5	230	82.5	145
G6AE2	G6AE2	G6AE2	G6AE2	29	29	29	29	102	102	102	102	97.2356	96.432	97.2356	94.423	MALE	MALE	MALE	MALE	0.507709	0.555203	0.473254	0.418585	87.9942	82.7708	88.396	75.9402	0.88883	0.956888	0.775404	0.853261	0.00543478	0.00638978	0.00515464	0.00522193	85	70	80	102.5
G6AE2	G6AE2	G6AE2	G6AE2	29	29	29	29	102	102	102	102	97.2356	96.432	97.2356	94.423	MALE	MALE	MALE	MALE	0.463615	0.529812	0.461363	0.413191	92.0122	69.5114	87.9942	79.1546	0.844149	0.879891	0.755315	0.820255	0.00496278	0.00609756	0.00502513	0.00515464	92.5	85	82.5	97.5
G6AE2	G6AE2	G6AE2	G6AE2	29	29	29	29	102	102	102	102	96.432	96.432	96.432	94.423	MALE	MALE	MALE	MALE	0.486306	0.506643	0.501656	0.418585	89.6014	76.342	85.5834	78.351	0.882772	0.966354	0.843186	0.791424	0.00529101	0.0058309	0.00591716	0.00522193	87.5	92.5	67.5	92.5
G6AE2	G6AE2	G6AE2	G6AE2	29	29	29	29	102	102	102	102	96.432	96.432	96.432	98.441	MALE	MALE	MALE	MALE	0.486306	0.514138	0.431449	0.42401	86.7888	92.414	90.405	70.315	0.899366	1.03836	0.793026	0.837083	0.00529101	0.00591716	0.00508906	0.00502513	92.5	80	82.5	115
G6AE2	G6AE2	G6AE2	G6AE2	29	29	29	29	102	102	102	102	96.432	94.423	96.432	98.441	MALE	MALE	MALE	MALE	0.473772	0.2009	0.442714	0.42401	94.0212	56.6538	91.6104	75.1366	0.843239	0.695139	0.821618	0.868631	0.00515464	0.002886	0.00522193	0.00502513	82.5	265	80	112.5
G6AE2	G6AE2	G6AE2	G6AE2	29	29	29	29	102	102	102	102	96.432	94.423	96.432	98.441	MALE	MALE	MALE	MALE	0.492824	0.333071	0.46076	0.42401	87.9942	77.9492	88.7978	81.9672	0.826237	0.829247	0.833782	0.92098	0.00536193	0.00478469	0.00543478	0.00502513	80	115	77.5	110
G6AE2	G6AE2	G6AE2	G6AE2	29	29	29	29	102	102	102	102	94.8248	94.423	96.432	98.441	MALE	MALE	MALE	MALE	0.250782	0.378325	0.454583	0.478062	63.8862	77.5474	79.1546	85.9852	0.586112	0.871319	0.761102	0.939729	0.00272851	0.00543478	0.00536193	0.00566572	257.5	95	82.5	85
G6AE2	G6AE2	G6AE2	G6AE2	29	29	29	29	102	102	102	102	94.8248	94.423	94.8248	98.441	MALE	MALE	MALE	MALE	0.492824	0.358824	0.250856	0.492	66.297	80.7618	70.315	74.333	0.766439	0.882643	0.76847	0.859341	0.00536193	0.00515464	0.0026738	0.0058309	100	102.5	282.5	85
G6AE2	G6AE2	G6AE2	G6AE2	29	29	29	29	102	102	102	102	94.8248	94.423	94.8248	96.8338	MALE	MALE	MALE	MALE	0.414951	0.282401	0.471459	0.285702	80.7618	67.1006	67.9042	64.6898	0.708437	0.458025	0.685901	0.79374	0.00451467	0.0040568	0.00502513	0.00502513	107.5	100	100	117.5
G6AE2	G6AE2	G6AE2	G6AE2	29	29	29	29	102	102	102	102	94.8248	98.441	94.8248	96.8338	MALE	MALE	MALE	MALE	0.486306	0.405333	0.443595	0.272032	91.2086	72.324	87.5924	69.5114	0.877006	0.861	0.768354	0.720325	0.00529101	0.00502513	0.00472813	0.00478469	85	115	97.5	112.5
G6AE2	G6AE2	G6AE2	G6AE2	29	29	29	29	102	102	102	102	94.8248	98.441	94.8248	96.8338	MALE	MALE	MALE	MALE	0.560437	0.405333	0.539197	0.285702	92.0122	84.7798	88.7978	76.7438	0.929416	0.952582	0.853825	0.941642	0.00609756	0.00502513	0.00574713	0.00502513	65	110	70	117.5
G6AE2	G6AE2	G6AE2	G6AE2	29	29	29	29	102	102	102	102	96.432	98.441	94.8248	96.8338	MALE	MALE	MALE	MALE	0.298201	0.438377	0.547057	0.268817	51.8322	86.387	91.6104	75.9402	0.320942	1.05996	0.821618	0.681078	0.0031348	0.00543478	0.0058309	0.00472813	157.5	102.5	60	100
G6AE2	G6AE2	G6AE2	G6AE2	29	29	29	29	102	102	102	102	96.432	98.441	96.432	96.8338	MALE	MALE	MALE	MALE	0.524111	0.491837	0.233532	0.233011	82.369	84.7798	79.9582	45.8052	0.952243	1.10823	0.768829	0.52954	0.00550964	0.00609756	0.00282486	0.00409836	95	87.5	250	157.5
G6AE2	G6AE2	G6AE2	G6AE2	29	29	29	29	102	102	102	102	96.432	98.441	96.432	97.6374	MALE	MALE	MALE	MALE	0.638431	0.463571	0.53682	0.489305	73.5294	79.5564	78.351	70.315	0.961169	1.15299	0.880348	0.837083	0.00671141	0.00574713	0.00649351	0.00515464	72.5	105	65	110
G6AE2	G6AE2	G6AE2	G6AE2	29	29	29	29	102	102	102	102	96.432	96.8338	96.432	97.6374	MALE	MALE	MALE	MALE	0.490341	0.317919	0.496519	0.48308	80.7618	71.9222	73.9312	95.6284	0.795683	0.745308	0.786502	0.942152	0.00515464	0.00515464	0.00600601	0.00508906	92.5	97.5	72.5	95
G6AE2	G6AE2	G6AE2	G6AE2	29	29	29	29	102	102	102	102	96.432	96.8338	96.432	97.6374	MALE	MALE	MALE	MALE	0.51699	0.32633	0.420714	0.53782	93.6194	67.9042	88.396	89.1996	0.839636	0.808383	0.792789	0.974859	0.00543478	0.00529101	0.00508906	0.00566572	72.5	105	85	85
G6AE2	G6AE2	G6AE2	G6AE2	29	29	29	29	102	102	102	102	94.423	96.8338	96.432	96.432	MALE	MALE	MALE	MALE	0.222905	0.284879	0.511891	0.485883	52.234	73.1276	84.7798	83.5744	0.382667	0.799209	0.856362	1.02545	0.00284495	0.00461894	0.00619195	0.00638978	215	125	62.5	75
G6AE2	G6AE2	G6AE2	G6AE2	29	29	29	29	102	102	102	102	94.423	96.8338	94.423	96.432	MALE	MALE	MALE	MALE	0.305462	0.317919	0.198779	0.456701	76.7438	91.2086	55.8502	86.7888	0.658745	0.921299	0.610385	0.975155	0.00389864	0.00515464	0.00301659	0.00600601	140	95	240	77.5
G6AE2	G6AE2	G6AE2	G6AE2	29	29	29	29	102	102	102	102	94.423	96.8338	94.423	96.432	MALE	MALE	MALE	MALE	0.414556	0.295102	0.172727	0.430825	81.9672	53.4394	64.6898	94.423	0.788146	0.747404	0.580178	0.930276	0.00529101	0.00478469	0.00262123	0.00566572	85	137.5	270	75
G6AE2	G6AE2	G6AE2	G6AE2	29	29	29	29	102	102	102	102	94.423	97.6374	94.423	96.432	MALE	MALE	MALE	MALE	0.409144	0.495849	0.315288	0.382114	83.1726	80.36	77.1456	65.0916	0.763051	0.956667	0.741785	0.674524	0.00522193	0.00490196	0.00478469	0.00502513	82.5	120	105	102.5
G6AE2	G6AE2	G6AE2	G6AE2	29	29	29	29	102	102	102	102	94.423	97.6374	94.423	96.432	MALE	MALE	MALE	MALE	0.431686	0.521408	0.331132	0.382114	77.1456	86.7888	83.5744	71.1186	0.820698	1.00334	0.687855	0.900235	0.00550964	0.00515464	0.00502513	0.00502513	87.5	107.5	77.5	120
G6AE2	G6AE2	G6AE2	G6AE2	29	29	29	29	102	102	102	102	98.441	97.6374	94.423	97.2356	MALE	MALE	MALE	MALE	0.413065	0.549745	0.3441	0.481035	85.5834	92.0122	81.1636	81.9672	0.767564	1.06372	0.711961	0.92098	0.0046729	0.00543478	0.00522193	0.00508906	102.5	97.5	77.5	107.5
G6AE2	G6AE2	G6AE2	G6AE2	29	29	29	29	102	102	102	102	98.441	97.6374	94.423	97.2356	MALE	MALE	MALE	MALE	0.455649	0.557318	0.319105	0.506828	87.9942	97.2356	57.0556	84.378	0.866938	1.09253	0.442291	0.975468	0.00515464	0.00550964	0.00484262	0.00536193	92.5	92.5	77.5	100
G6AE2	G6AE2	G6AE2	G6AE2	29	29	29	29	102	102	102	102	98.441	96.432	98.441	97.2356	MALE	MALE	MALE	MALE	0.547344	0.489615	0.376282	0.506828	82.369	93.2176	79.9582	88.7978	0.952243	1.17997	0.768829	0.970468	0.00619195	0.00628931	0.00461894	0.00536193	75	80	112.5	95
G6AE2	G6AE2	G6AE2	G6AE2	29	29	29	29	102	102	102	102	98.441	96.432	98.441	97.2356	MALE	MALE	MALE	MALE	0.493832	0.434909	0.404293	0.535544	86.7888	103.263	84.7798	89.6014	0.855062	1.19379	0.81519	0.953206	0.00558659	0.00558659	0.00496278	0.00566572	77.5	92.5	97.5	82.5
G6AE2	G6AE2	G6AE2	G6AE2	29	29	29	29	102	102	102	102	96.8338	96.432	98.441	98.0392	MALE	MALE	MALE	MALE	0.289347	0.434909	0.461558	0.535102	81.1636	86.0082	84.378	92.8158	0.863443	0.789066	0.975468	1.10495	0.00628931	0.00558659	0.00566572	0.00628931	65	70	90	75
G6AE2	G6AE2	G6AE2	G6AE2	29	29	29	29	102	102	102	102	96.8338	96.432	98.441	98.0392	MALE	MALE	MALE	MALE	0.22279	0.368079	0.482041	0.535102	72.324	60.6718	83.9762	86.7888	0.730545	0.848557	0.943553	1.06489	0.00484262	0.00472813	0.00591716	0.00628931	107.5	140	80	77.5
G6AE2	G6AE2	G6AE2	G6AE2	29	29	29	29	102	102	102	102	96.8338	96.432	98.441	98.0392	MALE	MALE	MALE	MALE	0.214982	0.359579	0.461558	0.535102	71.9222	82.369	78.351	85.5834	0.645042	0.773418	0.880348	1.08333	0.0046729	0.00461894	0.00566572	0.00628931	102.5	110	87.5	80
G6AE2	G6AE2	G6AE2	G6AE2	29	29	29	29	102	102	102	102	96.8338	97.2356	96.8338	98.0392	MALE	MALE	MALE	MALE	0.220125	0.499593	0.354943	0.482046	89.6014	87.5924	65.8952	81.5654	0.8036	1.01263	0.80853	0.971017	0.00478469	0.00529101	0.0058309	0.00566572	97.5	102.5	90	92.5
G6AE2	G6AE2	G6AE2	G6AE2	29	29	29	30	102	102	102	98	96.8338	97.2356	96.8338	95.2266	MALE	MALE	MALE	MALE	0.289347	0.513168	0.287814	0.250392	55.0466	89.1996	76.342	61.0736	0.797777	1.03121	0.771131	0.587246	0.00628931	0.00543478	0.00472813	0.00364964	90	97.5	112.5	170
G6AE2	G6AE2	G6AE2	G6AE2	29	29	29	30	102	102	102	98	96.8338	97.2356	96.8338	95.2266	MALE	MALE	MALE	MALE	0.228318	0.527503	0.262949	0.23536	36.5638	90.0032	80.36	30.135	0.619725	1.13928	0.704912	0.558056	0.00496278	0.00558659	0.00431965	0.00343053	142.5	100	117.5	237.5
G6AE2	G6AE2	G6AE2	G6AE2	29	29	29	30	102	102	102	98	97.6374	98.0392	96.8338	95.2266	MALE	MALE	MALE	MALE	0.557934	0.563531	0.344888	0.147068	77.9492	96.432	79.5564	70.315	0.829247	1.08351	0.824419	0.748032	0.00543478	0.00628931	0.00566572	0.00214362	90	70	80	372.5
G6AE2	G6AE2	G6AE2	G6AE2	29	29	29	30	102	102	102	98	97.6374	98.0392	96.8338	95.2266	MALE	MALE	MALE	MALE	0.458303	0.563531	0.294783	0.328265	86.387	89.1996	52.234	79.9582	0.811146	1.0619	0.66119	0.787766	0.00446429	0.00628931	0.00484262	0.00478469	117.5	75	127.5	107.5
G6AE2	G6AE2	G6AE2	G6AE2	29	29	29	30	102	102	102	98	97.6374	98.0392	97.6374	95.2266	MALE	MALE	MALE	MALE	0.581642	0.554807	0.496697	0.324385	90.0032	86.7888	71.9222	73.5294	0.957481	0.975155	0.76513	0.690417	0.00566572	0.00619195	0.00502513	0.00472813	82.5	72.5	105	105
G6AE2	G6AE2	G6AE2	G6AE2	29	29	29	30	102	102	102	98	97.6374	98.0392	97.6374	95.2266	MALE	MALE	MALE	MALE	0.536083	0.480436	0.472932	0.353646	100.45	88.396	94.8248	63.4844	0.92156	0.916021	0.831796	0.733924	0.00522193	0.00536193	0.00478469	0.00515464	82.5	90	95	107.5
G6AE2	G6AE2	G6AE2	G6AE2	29	30	29	30	102	98	102	98	96.432	95.2266	97.6374	99.6464	MALE	MALE	MALE	MALE	0.462407	0.263386	0.529988	0.134217	99.2446	43.3944	94.8248	50.6268	0.870567	0.549296	0.850447	0.384995	0.00558659	0.00361664	0.00536193	0.00212089	65	197.5	75	340
G6AE2	G6AE2	G6AE2	G6AE2	29	30	29	30	102	98	102	98	96.432	95.2266	97.6374	99.6464	MALE	MALE	MALE	MALE	0.520571	0.14032	0.552194	0.165881	87.9942	51.8322	96.432	49.0196	0.88883	0.700435	0.884697	0.495147	0.00628931	0.00192678	0.00558659	0.00262123	60	445	70	282.5
G6AE2	G6AE2	G6AE2	G6AE2	29	30	29	30	102	98	102	98	96.432	95.2266	96.432	99.6464	MALE	MALE	MALE	MALE	0.449841	0.348451	0.39999	0.17267	61.0736	77.5474	91.2086	22.9026	0.649719	0.847513	0.970304	0.309495	0.00543478	0.00478469	0.00600601	0.00272851	90	117.5	72.5	292.5
G6AE2	G6AE2	G6AE2	G6AE2	29	30	29	30	102	98	102	98	96.432	95.2266	96.432	99.6464	MALE	MALE	MALE	MALE	0.361445	0.361421	0.394073	0.0768004	85.1816	75.1366	96.8338	24.9116	0.763961	0.821165	1.00346	0.315337	0.00436681	0.00496278	0.00591716	0.00121359	117.5	110	72.5	745
G6AE2	G6AE2	G6AE2	G6AE2	29	30	29	30	102	98	102	98	97.2356	95.2266	96.432	99.6464	MALE	MALE	MALE	MALE	0.511285	0.34031	0.432457	0.148379	73.9312	71.1186	70.7168	37.7692	0.766126	0.777252	0.955632	0.37211	0.00529101	0.0046729	0.00649351	0.00234467	92.5	122.5	80	325
G6AE2	G6AE2	G6AE2	G6AE2	29	30	29	30	102	98	102	98	97.2356	99.6464	96.432	99.6464	MALE	MALE	MALE	MALE	0.467956	0.145552	0.284608	0.152859	89.6014	42.189	65.0916	57.4574	0.861552	0.437192	0.674524	0.436938	0.00484262	0.00234467	0.0042735	0.00241546	102.5	330	137.5	282.5
G6AE2	G6AE2	G6AE2	G6AE2	29	30	29	30	102	98	102	98	97.2356	99.6464	96.432	99.6464	MALE	MALE	MALE	MALE	0.498108	0.167101	0.412374	0.112704	90.8068	61.8772	56.6538	59.0646	0.873142	0.453313	0.885216	0.486128	0.00515464	0.00269179	0.00619195	0.00178094	90	235	97.5	440
G6AE2	G6AE2	G6AE2	G6AE2	29	30	29	30	102	98	102	98	97.2356	99.6464	97.2356	99.6464	MALE	MALE	MALE	MALE	0.539849	0.050614	0.448197	0.181328	90.0032	38.9746	79.9582	56.252	0.886731	0.393683	0.750781	0.493439	0.00558659	0.000815328	0.00461894	0.00286533	77.5	1127.5	110	235
G6AE2	G6AE2	G6AE2	G6AE2	29	30	29	30	102	98	102	98	97.2356	99.6464	97.2356	96.432	MALE	MALE	MALE	MALE	0.532413	0.15178	0.493815	0.195144	96.432	51.0286	87.9942	57.4574	0.884697	0.479142	0.789186	0.527132	0.00550964	0.00244499	0.00508906	0.00286533	72.5	302.5	85	240
G6AE2	G6AE2	G6AE2	G6AE2	29	30	29	30	102	98	102	98	98.0392	99.6464	97.2356	96.432	MALE	MALE	MALE	MALE	0.545575	0.117907	0.520293	0.199429	95.6284	59.8682	90.405	60.27	1.04512	0.51389	0.810807	0.540538	0.00638978	0.00189934	0.00536193	0.00292826	65	410	75	230
G6AE2	G6AE2	G6AE2	G6AE2	29	30	29	30	102	98	102	98	98.0392	99.6464	97.2356	96.432	MALE	MALE	MALE	MALE	0.536997	0.144704	0.542093	0.192387	91.2086	64.288	94.423	60.27	0.996815	0.603643	0.907913	0.506471	0.00628931	0.002331	0.00558659	0.00282486	67.5	322.5	75	235
G6AE2	G6AE2	G6AE2	G6AE2	29	30	29	30	102	98	102	98	98.0392	99.6464	98.0392	96.432	MALE	MALE	MALE	MALE	0.545575	0.176609	0.594744	0.188396	90.8068	61.0736	91.2086	61.4754	1.04979	0.547745	1.05443	0.5166	0.00638978	0.00284495	0.00660066	0.00276625	70	240	65	242.5
G6AE2	G6AE2	G6AE2	G6AE2	29	30	29	30	102	98	102	98	98.0392	96.432	98.0392	96.432	MALE	MALE	MALE	MALE	0.490704	0.187007	0.541163	0.2009	79.1546	59.4664	90.405	20.8936	0.942317	0.499718	0.988033	0.354129	0.00574713	0.00276625	0.00600601	0.00294985	90	242.5	75	280
G6AE2	G6AE2	G6AE2	G6AE2	30	30	29	30	98	98	102	98	95.2266	96.432	98.0392	96.432	MALE	MALE	MALE	MALE	0.267867	0.193704	0.557917	0.415275	54.243	61.0736	81.5654	31.7422	0.59282	0.464438	0.867717	0.477326	0.00389864	0.00286533	0.00619195	0.00609756	165	217.5	67.5	97.5
G6AE2	G6AE2	G6AE2	G6AE2	30	30	29	30	98	98	102	98	95.2266	96.432	98.0392	96.432	MALE	MALE	MALE	MALE	0.250758	0.195102	0.476739	0.191038	13.2594	60.27	83.5744	61.8772	0.30135	0.540538	0.844186	0.542782	0.00364964	0.002886	0.00529101	0.00280505	230	235	90	242.5
G6AE2	G6AE2	G6AE2	G6AE2	30	30	30	30	98	98	98	98	95.2266	96.432	95.2266	94.0212	MALE	MALE	MALE	MALE	0.235704	0.188309	0.261021	0.269408	12.8576	59.8682	65.0916	59.8682	0.309822	0.482808	0.476862	0.620396	0.00343053	0.00278552	0.00371747	0.0041841	250	235	132.5	142.5
G6AE2	G6AE2	G6AE2	G6AE2	30	30	30	30	98	98	98	98	95.2266	96.432	95.2266	94.0212	MALE	MALE	MALE	MALE	0.296794	0.133471	0.320614	0.097337	80.7618	63.8862	34.5548	46.207	0.664706	0.525812	0.519621	0.584899	0.00431965	0.00197433	0.00456621	0.00151172	110	385	152.5	582.5
G6AE2	G6AE2	G6AE2	G6AE2	30	30	30	30	98	98	98	98	95.2266	96.432	95.2266	94.0212	MALE	MALE	MALE	MALE	0.336803	0.195102	0.12286	0.234994	80.7618	65.4934	53.0376	60.6718	0.724321	0.629744	0.403328	0.597752	0.00490196	0.002886	0.00174978	0.00364964	92.5	242.5	440	172.5
G6AE2	G6AE2	G6AE2	G6AE2	30	30	30	30	98	98	98	98	95.2266	94.0212	95.2266	94.0212	MALE	MALE	MALE	MALE	0.332725	0.277657	0.309998	0.256018	73.9312	47.4124	80.7618	66.6988	0.648519	0.49132	0.678671	0.691179	0.00484262	0.00389864	0.00441501	0.00397614	92.5	160	107.5	155
G6AE2	G6AE2	G6AE2	G6AE2	30	30	30	30	98	98	98	98	95.2266	94.0212	95.2266	94.0212	MALE	MALE	MALE	MALE	0.349658	0.108071	0.340022	0.263887	66.6988	61.0736	79.1546	67.9042	0.709562	0.68622	0.651478	0.685901	0.00508906	0.00151745	0.00484262	0.00409836	102.5	570	85	145
G6AE2	G6AE2	G6AE2	G6AE2	30	30	30	30	98	98	98	98	99.6464	94.0212	95.2266	94.0212	MALE	MALE	MALE	MALE	0.134949	0.255265	0.357326	0.228733	51.8322	67.1006	62.279	59.4664	0.306699	0.630053	0.645378	0.649906	0.00216685	0.00358423	0.00508906	0.0035524	292.5	172.5	100	190
G6AE2	G6AE2	G6AE2	G6AE2	30	30	30	30	98	98	98	98	99.6464	94.0212	99.6464	95.6284	MALE	MALE	MALE	MALE	0.161136	0.301138	0.159864	0.163339	51.8322	63.8862	50.225	58.261	0.418002	0.662033	0.431116	0.534505	0.00258732	0.00422833	0.00250627	0.00343053	262.5	140	282.5	182.5
G6AE2	G6AE2	G6AE2	G6AE2	30	30	30	30	98	98	98	98	99.6464	94.0212	99.6464	95.6284	MALE	MALE	MALE	MALE	0.182369	0.272348	0.1683	0.173771	44.198	62.279	52.234	47.8142	0.371412	0.456256	0.421242	0.52256	0.00292826	0.00382409	0.00263852	0.00364964	222.5	125	255	182.5
G6AE2	G6AE2	G6AE2	G6AE2	30	30	30	30	98	98	98	98	99.6464	94.0212	99.6464	95.6284	MALE	MALE	MALE	MALE	0.0729262	0.277657	0.0522192	0.103171	30.9386	71.1186	49.0196	17.6792	0.1804	0.66778	0.372773	0.276237	0.00117096	0.00389864	0.000818666	0.00216685	682.5	150	1090	397.5
G6AE2	G6AE2	G6AE2	G6AE2	30	30	30	30	98	98	98	98	99.6464	95.6284	99.6464	95.6284	MALE	MALE	MALE	MALE	0.153208	0.249635	0.154072	0.0879285	54.243	67.5024	54.243	25.7152	0.390237	0.57942	0.376687	0.435851	0.00246002	0.0034904	0.00241546	0.00184672	267.5	170	270	482.5
G6AE2	G6AE2	G6AE2	G6AE2	30	30	30	30	98	98	98	98	99.6464	95.6284	99.6464	95.6284	MALE	MALE	MALE	MALE	0.146023	0.239199	0.184086	0.191218	57.0556	60.6718	26.5188	70.315	0.353285	0.569688	0.398779	0.616798	0.00234467	0.00334448	0.002886	0.00401606	265	192.5	280	135
G6AE2	G6AE2	G6AE2	G6AE2	30	30	30	30	98	98	98	98	99.6464	95.6284	99.6464	95.6284	MALE	MALE	MALE	MALE	0.109936	0.243267	0.234938	0.197157	63.4844	38.9746	41.3854	47.0106	0.364853	0.493349	0.186842	0.543475	0.00176523	0.00340136	0.00368324	0.00414079	392.5	215	50	155
G6AE2	G6AE2	G6AE2	G6AE2	30	30	30	30	98	98	98	98	99.6464	95.6284	99.6464	95.6284	MALE	MALE	MALE	MALE	0.175929	0.0741913	0.181467	0.112962	60.27	65.4934	54.243	49.0196	0.391364	0.696738	0.428798	0.550782	0.00282486	0.00103734	0.00284495	0.00237248	200	870	225	332.5
G6AE2	G6AE2	G6AE2	G6AE2	30	30	30	30	98	98	98	98	96.432	95.6284	99.6464	94.8248	MALE	MALE	MALE	MALE	0.181293	0.308943	0.180186	0.277985	62.279	65.4934	60.6718	38.9746	0.41798	0.661549	0.428776	0.545099	0.0026738	0.00431965	0.00282486	0.00397614	225	132.5	212.5	180
G6AE2	G6AE2	G6AE2	G6AE2	30	30	30	30	98	98	98	98	96.432	95.6284	96.432	94.8248	MALE	MALE	MALE	MALE	0.197104	0.245353	0.175718	0.122333	63.8862	20.4918	61.8772	72.324	0.476763	0.4182	0.395381	0.607765	0.00290698	0.00343053	0.00278552	0.00174978	210	242.5	202.5	452.5
G6AE2	G6AE2	G6AE2	G6AE2	30	30	30	30	98	98	98	98	96.432	95.6284	96.432	94.8248	MALE	MALE	MALE	MALE	0.188868	0.197843	0.173304	0.28653	64.6898	71.9222	63.8862	72.7258	0.473918	0.659837	0.361961	0.773679	0.00278552	0.00276625	0.00274725	0.00409836	222.5	252.5	187.5	150
G6AE2	G6AE2	G6AE2	G6AE2	30	30	30	30	98	98	98	98	96.432	94.8248	96.432	94.8248	MALE	MALE	MALE	MALE	0.188868	0.350373	0.18338	0.322925	63.4844	53.8412	64.288	68.306	0.412236	0.703807	0.410786	0.707834	0.00278552	0.00478469	0.00290698	0.00461894	205	132.5	187.5	120
G6AE2	G6AE2	G6AE2	G6AE2	30	30	30	30	98	98	98	98	96.432	94.8248	96.432	94.8248	MALE	MALE	MALE	MALE	0.22868	0.12539	0.173304	0.308668	31.7422	53.8412	63.8862	64.6898	0.414931	0.727584	0.378025	0.688189	0.00337268	0.00171233	0.00274725	0.00441501	220	510	195	132.5
G6AE2	G6AE2	G6AE2	G6AE2	30	30	30	30	98	98	98	98	96.432	94.8248	96.432	94.8248	MALE	MALE	MALE	MALE	0.32442	0.303222	0.125164	0.237145	21.6972	68.306	62.6808	72.324	0.230821	0.656788	0.388116	0.836116	0.00478469	0.00414079	0.00198413	0.00515464	115	137.5	342.5	107.5
G6AE2	G6AE2	G6AE2	G6AE2	30	30	30	30	98	98	98	98	96.432	94.8248	96.432	94.8248	MALE	MALE	MALE	MALE	0.187562	0.306394	0.190294	0.19873	65.8952	82.7708	62.6808	66.297	0.434952	0.777191	0.420677	0.687016	0.00276625	0.0041841	0.00301659	0.00431965	210	132.5	182.5	135
G6AE2	G6AE2	G6AE2	G6AE2	30	30	30	30	98	98	98	98	94.0212	94.8248	94.0212	94.8248	MALE	MALE	MALE	MALE	0.278708	0.309632	0.301562	0.205384	59.0646	70.7168	46.207	69.1096	0.596612	0.664008	0.455241	0.735209	0.00409836	0.00422833	0.00422833	0.00446429	145	130	135	130
G6AE2	G6AE2	G6AE2	G6AE2	30	30	30	30	98	98	98	98	94.0212	94.8248	94.0212	94.8248	MALE	MALE	MALE	MALE	0.100154	0.290085	0.104268	0.190501	37.3674	75.5384	69.9132	68.7078	0.327784	0.763014	0.552674	0.711998	0.00147275	0.0046729	0.00146199	0.00414079	565	115	557.5	145
G6AE2	G6AE2	G6AE2	G6AE2	30	30	30	30	98	98	98	98	94.0212	94.8248	94.0212	94.8248	MALE	MALE	MALE	MALE	0.24158	0.274075	0.265128	0.18855	67.5024	68.306	66.6988	69.1096	0.477049	0.767483	0.560494	0.648916	0.0035524	0.00441501	0.00371747	0.00409836	140	137.5	150	137.5
G6AE2	G6AE2	G6AE2	G6AE2	30	30	30	30	98	98	98	98	94.0212	94.8248	94.0212	94.8248	MALE	MALE	MALE	MALE	0.275881	0.268156	0.278049	0.119808	68.306	74.7348	70.315	32.5458	0.562189	0.736303	0.55585	0.551624	0.0040568	0.00431965	0.00389864	0.00260417	125	130	130	325
G6AE2	G6AE2	G6AE2	G6AE2	30	30	30	30	98	98	98	98	94.0212	94.8248	94.0212	92.414	MALE	MALE	MALE	MALE	0.275881	0.274075	0.251125	0.260396	70.7168	69.9132	63.0826	67.1006	0.582031	0.764079	0.378874	0.677784	0.0040568	0.00441501	0.00352113	0.0040568	125	135	117.5	147.5
G6AE2	G6AE2	G6AE2	G6AE2	30	30	30	30	98	98	98	98	94.0212	94.8248	94.0212	92.414	MALE	MALE	MALE	MALE	0.229358	0.220526	0.275365	0.299942	69.5114	59.8682	72.7258	71.9222	0.538848	0.562143	0.523207	0.675326	0.00337268	0.0035524	0.003861	0.0046729	167.5	175	120	107.5
G6AE2	G6AE2	G6AE2	G6AE2	30	30	30	30	98	98	98	98	95.6284	92.414	95.6284	92.414	MALE	MALE	MALE	MALE	0.183938	0.23336	0.233908	0.271406	66.6988	74.333	57.8592	59.0646	0.537894	0.790777	0.448521	0.645515	0.00375235	0.00436681	0.0040568	0.00422833	142.5	135	117.5	145
G6AE2	G6AE2	G6AE2	G6AE2	30	30	30	30	98	98	98	98	95.6284	92.414	95.6284	92.414	MALE	MALE	MALE	MALE	0.171098	0.228374	0.227001	0.268567	59.4664	63.8862	53.0376	60.6718	0.489435	0.69821	0.498006	0.583383	0.0034904	0.0042735	0.00393701	0.0041841	165	142.5	147.5	135
G6AE2	G6AE2	G6AE2	G6AE2	30	30	30	30	98	98	98	98	95.6284	92.414	95.6284	92.414	MALE	MALE	MALE	MALE	0.20298	0.228374	0.201251	0.232143	42.189	65.4934	42.189	55.8502	0.517656	0.678688	0.426152	0.62753	0.00414079	0.0042735	0.0034904	0.00361664	160	137.5	187.5	187.5
G6AE2	G6AE2	G6AE2	G6AE2	30	30	30	30	98	98	98	98	95.6284	92.414	95.6284	92.414	MALE	MALE	MALE	MALE	0.156113	0.20633	0.0567224	0.243135	29.7332	52.234	73.5294	62.279	0.353967	0.586899	0.569995	0.546307	0.00318471	0.003861	0.000983768	0.00378788	230	170	887.5	150
G6AE2	G6AE2	G6AE2	G6AE2	30	30	30	30	98	98	98	98	95.6284	92.414	95.6284	94.8248	MALE	MALE	MALE	MALE	0.0656659	0.204357	0.272616	0.320575	39.3764	63.8862	55.8502	65.4934	0.21998	0.662033	0.537021	0.735881	0.00133958	0.00382409	0.00472813	0.00478469	567.5	165	107.5	120
G6AE2	G6AE2	G6AE2	G6AE2	30	30	30	30	98	98	98	98	95.6284	92.414	95.6284	94.8248	MALE	MALE	MALE	MALE	0.216422	0.195034	0.257403	0.292577	67.1006	49.4214	17.2774	67.5024	0.575971	0.606398	0.269959	0.633825	0.00441501	0.00364964	0.00446429	0.00436681	110	192.5	160	122.5
G6AE2	G6AE2	G6AE2	G6AE2	30	30	30	30	98	98	98	98	95.6284	94.8248	95.6284	94.8248	MALE	MALE	MALE	MALE	0.218837	0.300902	0.243798	0.302484	47.8142	73.9312	31.7422	66.6988	0.508662	0.74678	0.291213	0.657131	0.00446429	0.00446429	0.00422833	0.00451467	130	125	127.5	120
G6AE2	G6AE2	G6AE2	G6AE2	30	30	30	30	98	98	98	98	95.6284	94.8248	95.6284	94.8248	MALE	MALE	MALE	MALE	0.112948	0.314962	0.28974	0.187939	51.8322	66.6988	54.243	40.5818	0.498387	0.728949	0.59282	0.497936	0.00230415	0.0046729	0.00502513	0.00280505	330	122.5	107.5	275
G6AE2	G6AE2	G6AE2	G6AE2	30	30	30	30	98	98	98	98	94.8248	94.8248	94.8248	94.8248	MALE	MALE	MALE	MALE	0.303592	0.300902	0.2836	0.277433	26.5188	64.6898	21.6972	61.0736	0.469359	0.726852	0.466606	0.587246	0.00446429	0.00446429	0.00401606	0.00414079	167.5	135	202.5	137.5
G6AE2	G6AE2	G6AE2	G6AE2	30	30	30	29	98	98	98	99	94.8248	94.8248	94.8248	90.0032	MALE	MALE	MALE	MALE	0.173703	0.351968	0.183897	0.144502	22.099	39.3764	63.8862	41.7872	0.391133	0.592126	0.495242	0.483089	0.00255428	0.00522193	0.00260417	0.00258732	335	125	255	300
G6AE2	G6AE2	G6AE2	G6AE2	30	30	30	29	98	98	98	99	94.8248	94.8248	94.8248	90.0032	MALE	MALE	MALE	MALE	0.287546	0.163796	0.264977	0.219883	69.5114	70.7168	73.5294	58.6628	0.623421	0.664008	0.501907	0.538191	0.00422833	0.00243013	0.00375235	0.00393701	125	305	120	145
G6AE2	G6AE2	G6AE2	G6AE2	30	30	30	29	98	98	98	99	94.8248	94.8248	94.8248	90.0032	MALE	MALE	MALE	MALE	0.278708	0.288043	0.354856	0.228894	74.333	65.4934	71.5204	24.9116	0.697962	0.661549	0.641439	0.440913	0.00409836	0.0042735	0.00502513	0.00409836	137.5	135	87.5	187.5
G6AE2	G6AE2	G6AE2	G6AE2	30	29	30	29	98	99	98	99	94.8248	90.0032	94.8248	90.0032	MALE	MALE	MALE	MALE	0.307019	0.137622	0.31881	0.13095	71.9222	59.8682	67.5024	71.9222	0.617358	0.604729	0.619288	0.617358	0.00451467	0.00282486	0.00451467	0.00234467	105	255	112.5	310
G6AE2	G6AE2	G6AE2	G6AE2	30	29	30	29	98	99	98	99	94.8248	90.0032	94.8248	90.0032	MALE	MALE	MALE	MALE	0.317779	0.195656	0.252272	0.180745	65.0916	42.9926	73.9312	55.8502	0.657491	0.497024	0.728386	0.479401	0.0046729	0.00401606	0.00456621	0.00323625	115	162.5	117.5	192.5
G6AE2	G6AE2	G6AE2	G6AE2	30	29	30	29	98	99	98	99	94.8248	90.0032	94.8248	90.0032	MALE	MALE	MALE	MALE	0.216747	0.114902	0.261217	0.191596	76.7438	48.216	73.5294	56.6538	0.720599	0.630275	0.644995	0.476082	0.00508906	0.00235849	0.00472813	0.00343053	90	347.5	97.5	172.5
G6AE2	G6AE2	G6AE2	G6AE2	30	29	30	29	98	99	98	99	94.8248	90.0032	94.8248	90.0032	MALE	MALE	MALE	MALE	0.188039	0.179441	0.241255	0.141752	71.5204	66.6988	69.5114	49.8232	0.613909	0.488636	0.668379	0.490869	0.00441501	0.00368324	0.00436681	0.00253807	110	135	125	292.5
G6AE2	G6AE2	G6AE2	G6AE2	30	29	30	29	98	99	98	99	94.8248	90.0032	94.8248	94.0212	MALE	MALE	MALE	MALE	0.185986	0.168575	0.23865	0.288207	74.7348	57.0556	71.9222	68.7078	0.670267	0.59125	0.580018	0.771998	0.00436681	0.00346021	0.00431965	0.0046729	117.5	192.5	107.5	125
G6AE2	G6AE2	G6AE2	G6AE2	30	29	30	29	98	99	98	99	94.8248	90.0032	94.8248	94.0212	MALE	MALE	MALE	MALE	0.182012	0.162937	0.231161	0.272302	69.5114	43.7962	71.9222	66.6988	0.637719	0.478647	0.617358	0.709562	0.0042735	0.00334448	0.0041841	0.00441501	125	207.5	122.5	132.5
G6AE2	G6AE2	G6AE2	G6AE2	30	29	30	29	98	99	98	99	94.8248	94.0212	94.8248	94.0212	MALE	MALE	MALE	MALE	0.196724	0.235635	0.23865	0.278448	63.4844	69.1096	47.8142	68.7078	0.641257	0.716162	0.44896	0.645144	0.00461894	0.0046729	0.00431965	0.00451467	117.5	117.5	125	115
G6AE2	G6AE2	G6AE2	G6AE2	30	29	30	29	98	99	98	99	94.8248	94.0212	92.414	94.0212	MALE	MALE	MALE	MALE	0.156872	0.225116	0.144452	0.263574	28.126	75.9402	69.9132	45.4034	0.457333	0.767073	0.531659	0.593508	0.00368324	0.00446429	0.0034904	0.0042735	210	125	155	157.5
G6AE2	G6AE2	G6AE2	G6AE2	30	29	30	29	98	99	98	99	92.414	94.0212	92.414	94.0212	MALE	MALE	MALE	MALE	0.227261	0.227656	0.191157	0.238132	73.9312	54.243	73.1276	61.8772	0.66306	0.665558	0.670895	0.625022	0.00397614	0.00451467	0.00461894	0.003861	140	140	107.5	160
G6AE2	G6AE2	G6AE2	G6AE2	30	29	30	29	98	99	98	99	92.414	94.0212	92.414	94.0212	MALE	MALE	MALE	MALE	0.280177	0.191007	0.184756	0.238132	67.1006	63.4844	58.261	55.4484	0.713836	0.693819	0.511061	0.589877	0.00490196	0.00378788	0.00446429	0.003861	110	172.5	110	165
G6AE2	G6AE2	G6AE2	G6AE2	30	29	30	29	98	99	98	99	92.414	94.0212	92.414	93.6194	MALE	MALE	MALE	MALE	0.23187	0.204568	0.184756	0.164209	64.6898	51.8322	63.4844	32.9476	0.653432	0.61705	0.610427	0.477501	0.0040568	0.0040568	0.00446429	0.00255428	147.5	162.5	120	322.5
G6AE2	G6AE2	G6AE2	G6AE2	30	29	30	29	98	99	98	99	92.414	94.0212	92.414	93.6194	MALE	MALE	MALE	MALE	0.273474	0.206664	0.151042	0.277702	57.0556	37.7692	58.6628	69.5114	0.641074	0.493715	0.400429	0.720325	0.00478469	0.00409836	0.00364964	0.00431965	120	167.5	127.5	135
G6AE2	G6AE2	G6AE2	G6AE2	30	29	30	29	98	99	98	99	92.414	93.6194	92.414	93.6194	MALE	MALE	MALE	MALE	0.180588	0.115747	0.158262	0.287	66.297	65.7032	63.8862	69.5114	0.524087	0.456272	0.57297	0.720325	0.00315956	0.00253807	0.00382409	0.00446429	190	250	150	127.5
G6AE2	G6AE2	G6AE2	G6AE2	30	29	30	29	98	99	98	99	92.414	93.6194	92.414	93.6194	MALE	MALE	MALE	MALE	0.260987	0.205888	0.186842	0.266203	53.4394	76.7438	24.9116	73.1276	0.568504	0.688285	0.374611	0.757799	0.00456621	0.00451467	0.00451467	0.00414079	125	110	155	145
G6AE2	G6AE2	G6AE2	G6AE2	30	29	30	29	98	99	98	99	94.8248	93.6194	94.8248	93.6194	MALE	MALE	MALE	MALE	0.312561	0.19489	0.328925	0.277702	71.5204	71.9222	68.7078	59.8682	0.722428	0.659837	0.676924	0.54925	0.00446429	0.0042735	0.00490196	0.00431965	125	125	102.5	122.5
G6AE2	G6AE2	G6AE2	G6AE2	30	29	30	29	98	99	98	99	94.8248	93.6194	94.8248	93.6194	MALE	MALE	MALE	MALE	0.327167	0.203591	0.29625	0.216823	68.7078	73.5294	71.1186	34.9566	0.676924	0.707013	0.597635	0.428915	0.0046729	0.00446429	0.00441501	0.00337268	112.5	120	107.5	215
G6AE2	G6AE2	G6AE2	G6AE2	30	29	30	29	98	99	98	99	94.8248	93.6194	94.8248	93.6194	MALE	MALE	MALE	MALE	0.319697	0.177795	0.283723	0.151623	69.5114	50.225	69.5114	63.4844	0.623421	0.564326	0.560576	0.641257	0.00456621	0.00389864	0.00422833	0.00235849	107.5	167.5	112.5	325
G6AE2	G6AE2	G6AE2	G6AE2	30	29	30	29	98	99	98	99	94.8248	93.6194	94.8248	92.0122	MALE	MALE	MALE	MALE	0.302435	0.104477	0.254169	0.24707	73.5294	42.189	44.198	65.4934	0.644995	0.611435	0.296631	0.678688	0.00431965	0.00229095	0.00378788	0.00414079	117.5	367.5	115	145
G6AE2	G6AE2	G6AE2	G6AE2	30	29	30	29	98	99	98	99	94.8248	92.0122	94.8248	92.0122	MALE	MALE	MALE	MALE	0.197779	0.270206	0.215411	0.260556	44.198	67.9042	60.6718	69.5114	0.470191	0.762969	0.544142	0.720325	0.00282486	0.00436681	0.00321027	0.00436681	260	140	200	132.5
G6AE2	G6AE2	G6AE2	G6AE2	30	29	30	29	98	99	98	99	94.8248	92.0122	94.8248	92.0122	MALE	MALE	MALE	MALE	0.270323	0.264432	0.286755	0.266372	63.8862	72.324	63.0826	67.5024	0.548379	0.769404	0.637198	0.681842	0.003861	0.0042735	0.0042735	0.00446429	142.5	140	135	125
G6AE2	G6AE2	G6AE2	G6AE2	29	29	29	29	99	99	99	99	90.0032	92.0122	90.0032	92.0122	MALE	MALE	MALE	MALE	0.136793	0.289146	0.211327	0.285489	56.6538	65.4934	43.3944	59.8682	0.42279	0.779683	0.407459	0.672676	0.00237248	0.0046729	0.00346021	0.00478469	287.5	130	182.5	120
G6AE2	G6AE2	G6AE2	G6AE2	29	29	29	29	99	99	99	99	90.0032	92.0122	90.0032	92.0122	MALE	MALE	MALE	MALE	0.26328	0.314897	0.167785	0.282115	45.4034	58.261	57.8592	63.8862	0.574727	0.761582	0.530818	0.629421	0.00456621	0.00508906	0.00274725	0.00472813	140	120	255	110
G6AE2	G6AE2	G6AE2	G6AE2	29	29	29	29	99	99	99	99	90.0032	92.0122	90.0032	92.0122	MALE	MALE	MALE	MALE	0.216354	0.253595	0.252893	0.210096	18.4828	59.8682	37.3674	52.6358	0.313268	0.589834	0.504965	0.545449	0.00375235	0.00409836	0.00414079	0.00352113	207.5	142.5	167.5	187.5
G6AE2	G6AE2	G6AE2	G6AE2	29	29	29	29	99	99	99	99	90.0032	92.0122	90.0032	92.414	MALE	MALE	MALE	MALE	0.272616	0.212272	0.133058	0.185764	21.6972	60.6718	63.0826	58.6628	0.283624	0.612846	0.347563	0.624072	0.00472813	0.00343053	0.00217865	0.00456621	135	192.5	277.5	125
G6AE2	G6AE2	G6AE2	G6AE2	29	29	29	29	99	99	99	99	90.0032	92.414	90.0032	92.414	MALE	MALE	MALE	MALE	0.238751	0.224193	0.224949	0.168457	70.315	49.8232	58.6628	45.0016	0.545078	0.593133	0.407381	0.60813	0.00414079	0.00414079	0.00368324	0.00414079	112.5	157.5	127.5	167.5
G6AE2	G6AE2	G6AE2	G6AE2	29	29	29	29	99	99	99	99	90.0032	92.414	90.0032	92.414	MALE	MALE	MALE	MALE	0.19951	0.255993	0.213171	0.0731038	55.8502	31.3404	59.0646	50.6268	0.450405	0.554697	0.466914	0.684146	0.00346021	0.00472813	0.0034904	0.00179695	165	155	160	482.5
G6AE2	G6AE2	G6AE2	G6AE2	29	29	29	29	99	99	99	99	90.0032	92.414	90.0032	92.414	MALE	MALE	MALE	MALE	0.216354	0.0999862	0.238104	0.204433	51.0286	77.1456	29.3314	72.7258	0.447619	0.799436	0.339091	0.773679	0.00375235	0.00184672	0.00389864	0.00502513	152.5	445	170	105
G6AE2	G6AE2	G6AE2	G6AE2	29	29	29	29	99	99	99	99	90.0032	92.414	90.0032	92.414	MALE	MALE	MALE	MALE	0.136793	0.265405	0.482795	0.207034	61.8772	69.9132	14.063	57.0556	0.395381	0.785542	0.228667	0.722223	0.00237248	0.00490196	0.00790514	0.00508906	265	115	65	117.5
G6AE2	G6AE2	G6AE2	G6AE2	29	29	29	29	99	99	99	99	94.0212	92.414	90.0032	92.414	MALE	MALE	MALE	MALE	0.296656	0.259055	0.211327	0.194652	71.9222	69.1096	58.261	67.9042	0.708593	0.735209	0.489588	0.742122	0.0046729	0.00478469	0.00346021	0.00478469	112.5	115	170	117.5
G6AE2	G6AE2	G6AE2	G6AE2	29	29	29	29	99	99	99	99	94.0212	92.414	94.0212	92.414	MALE	MALE	MALE	MALE	0.274231	0.279085	0.0829903	0.190104	75.5384	53.4394	70.7168	32.5458	0.662618	0.676448	0.607011	0.5292	0.00431965	0.00515464	0.00451467	0.0046729	117.5	115	105	152.5
G6AE2	G6AE2	G6AE2	G6AE2	29	29	29	29	99	99	99	99	94.0212	90.8068	94.0212	90.8068	MALE	MALE	MALE	MALE	0.335896	0.161599	0.0858988	0.117616	56.252	26.117	72.7258	47.8142	0.650312	0.424667	0.682871	0.586677	0.00529101	0.00243013	0.0046729	0.00163532	102.5	350	107.5	530
G6AE2	G6AE2	G6AE2	G6AE2	29	29	29	29	99	99	99	99	94.0212	90.8068	94.0212	90.8068	MALE	MALE	MALE	MALE	0.227543	0.138106	0.0890186	0.275037	65.0916	75.5384	49.0196	70.7168	0.514558	0.677474	0.583567	0.594259	0.00358423	0.00207684	0.00484262	0.00382409	152.5	370	122.5	142.5
G6AE2	G6AE2	G6AE2	G6AE2	29	29	29	29	99	99	99	99	94.0212	90.8068	94.0212	90.8068	MALE	MALE	MALE	MALE	0.274231	0.234148	0.0658866	0.269877	53.0376	63.0826	66.297	47.8142	0.509977	0.519198	0.557118	0.569217	0.00431965	0.00352113	0.00358423	0.00375235	127.5	162.5	160	182.5
G6AE2	G6AE2	G6AE2	G6AE2	29	29	29	29	99	99	99	99	94.0212	90.8068	94.0212	90.8068	MALE	MALE	MALE	MALE	0.233828	0.261803	0.0723715	0.264907	67.1006	62.6808	57.8592	66.6988	0.541134	0.588552	0.530818	0.560494	0.00368324	0.00393701	0.00393701	0.00368324	147.5	147.5	145	152.5
G6AE2	G6AE2	G6AE2	G6AE2	29	29	29	29	99	99	99	99	93.6194	90.8068	94.0212	90.8068	MALE	MALE	MALE	MALE	0.144426	0.254294	0.0869142	0.196241	47.4124	34.5548	28.5278	41.3854	0.261225	0.483284	0.483522	0.540986	0.00230415	0.00382409	0.00472813	0.00272851	252.5	190	152.5	290
G6AE2	G6AE2	G6AE2	G6AE2	29	29	29	29	99	99	99	99	93.6194	90.8068	94.0212	90.8068	MALE	MALE	MALE	MALE	0.265035	0.18395	0.105646	0.288844	77.5474	67.5024	16.8756	69.9132	0.625382	0.619288	0.3444	0.587506	0.00422833	0.00276625	0.00574713	0.00401606	112.5	252.5	125	130
G6AE2	G6AE2	G6AE2	G6AE2	29	29	29	29	99	99	99	99	93.6194	90.8068	93.6194	92.414	MALE	MALE	MALE	MALE	0.267867	0.249523	0.128594	0.282874	78.351	69.5114	72.7258	65.8952	0.595825	0.549497	0.586498	0.649214	0.0042735	0.00375235	0.0022779	0.00422833	102.5	140	315	135
G6AE2	G6AE2	G6AE2	G6AE2	29	29	29	29	99	99	99	99	93.6194	92.414	93.6194	92.414	MALE	MALE	MALE	MALE	0.270759	0.242133	0.246519	0.298659	74.333	71.1186	76.342	75.9402	0.652044	0.73698	0.591798	0.748179	0.00431965	0.00436681	0.00436681	0.00446429	117.5	132.5	100	122.5
G6AE2	G6AE2	G6AE2	G6AE2	29	29	29	29	99	99	99	99	93.6194	92.414	93.6194	92.414	MALE	MALE	MALE	MALE	0.33609	0.247537	0.224465	0.292138	49.4214	76.342	77.5474	69.1096	0.555297	0.752138	0.529334	0.664515	0.00536193	0.00446429	0.00397614	0.00436681	97.5	122.5	105	125
G6AE2	G6AE2	G6AE2	G6AE2	29	29	29	29	99	99	99	99	93.6194	92.414	93.6194	92.414	MALE	MALE	MALE	MALE	0.1722	0.220471	0.283683	0.246408	43.7962	70.315	66.297	67.9042	0.238023	0.710253	0.608229	0.622974	0.00274725	0.00397614	0.00502513	0.00368324	180	152.5	90	162.5
G6AE2	G6AE2	G6AE2	G6AE2	29	29	29	29	99	99	99	99	93.6194	92.414	93.6194	92.414	MALE	MALE	MALE	MALE	0.159088	0.200537	0.241252	0.146549	71.5204	53.8412	45.0016	36.5638	0.514535	0.472291	0.505636	0.52991	0.00253807	0.00361664	0.0042735	0.00219058	255	162.5	145	387.5
G6AE2	G6AE2	G6AE2	G6AE2	29	29	29	29	99	99	99	99	92.0122	92.414	93.6194	92.414	MALE	MALE	MALE	MALE	0.185477	0.115759	0.112568	0.22189	73.5294	56.252	57.4574	63.8862	0.617894	0.582922	0.300039	0.560405	0.00393701	0.00208768	0.00199402	0.00331675	135	382.5	310	187.5
G6AE2	G6AE2	G6AE2	G6AE2	29	29	29	29	99	99	99	99	92.0122	90.405	92.0122	90.405	MALE	MALE	MALE	MALE	0.205725	0.287	0.267584	0.256706	70.7168	69.5114	70.315	67.1006	0.648778	0.739483	0.55585	0.575971	0.00436681	0.00529101	0.00422833	0.0042735	120	95	110	117.5
G6AE2	G6AE2	G6AE2	G6AE2	29	29	29	29	99	99	99	99	92.0122	90.405	92.0122	90.405	MALE	MALE	MALE	MALE	0.220145	0.229357	0.295717	0.26231	66.6988	65.8952	68.7078	66.297	0.62628	0.701013	0.630347	0.622507	0.0046729	0.00422833	0.0046729	0.00436681	107.5	142.5	105	122.5
G6AE2	G6AE2	G6AE2	G6AE2	29	29	29	29	99	99	99	99	92.0122	90.405	92.0122	90.405	MALE	MALE	MALE	MALE	0.228141	0.234311	0.306458	0.231927	63.8862	66.6988	63.8862	54.243	0.61429	0.691179	0.662033	0.497642	0.00484262	0.00431965	0.00484262	0.003861	102.5	135	110	150
G6AE2	G6AE2	G6AE2	G6AE2	29	29	29	29	99	99	99	99	92.0122	90.405	92.0122	90.405	MALE	MALE	MALE	MALE	0.222747	0.171384	0.295717	0.167323	63.0826	44.5998	67.1006	51.4304	0.565763	0.450503	0.645198	0.57787	0.00472813	0.00315956	0.0046729	0.00278552	100	217.5	110	270
G6AE2	G6AE2	G6AE2	G6AE2	29	29	29	29	99	99	99	99	92.0122	90.405	92.0122	90.405	MALE	MALE	MALE	MALE	0.161616	0.170041	0.285704	0.2254	57.8592	61.4754	51.4304	40.5818	0.466606	0.539258	0.519499	0.530481	0.00343053	0.0031348	0.00451467	0.00375235	167.5	205	122.5	190
G6AE2	G6AE2	G6AE2	G6AE2	29	29	29	29	99	99	99	99	92.0122	90.405	92.0122	90.405	MALE	MALE	MALE	MALE	0.207996	0.154319	0.208169	0.108428	42.189	27.7242	60.27	35.7602	0.55149	0.416905	0.496049	0.370572	0.00441501	0.00284495	0.00328947	0.00180505	150	285	182.5	457.5
G6AE2	G6AE2	G6AE2	G6AE2	29	29	29	29	99	99	99	99	92.414	90.405	92.414	90.405	MALE	MALE	MALE	MALE	0.186517	0.101105	0.266141	0.178511	55.4484	55.8502	60.6718	57.8592	0.508701	0.512387	0.681706	0.496645	0.00461894	0.00186393	0.00515464	0.00297177	107.5	427.5	105	220
G6AE2	G6AE2	G6AE2	G6AE2	29	29	29	29	99	99	99	99	92.414	88.396	92.414	88.396	MALE	MALE	MALE	MALE	0.186517	0.123504	0.205293	0.131438	36.9656	62.279	53.0376	65.8952	0.577587	0.629081	0.498006	0.618734	0.00461894	0.00409836	0.00397614	0.00414079	152.5	145	145	135
G6AE2	G6AE2	G6AE2	G6AE2	29	29	29	29	99	99	99	99	92.414	88.396	92.414	88.396	MALE	MALE	MALE	MALE	0.0697425	0.131594	0.24412	0.137115	65.8952	55.8502	22.099	62.6808	0.389912	0.594151	0.429107	0.649542	0.00172712	0.00436681	0.00472813	0.00431965	410	135	160	135
G6AE2	G6AE2	G6AE2	G6AE2	29	29	29	29	99	99	99	99	92.414	88.396	92.414	88.396	MALE	MALE	MALE	MALE	0.202919	0.0635759	0.140877	0.0979698	69.5114	51.8322	24.5098	32.144	0.684841	0.582384	0.368568	0.434378	0.00502513	0.0021097	0.00272851	0.00308642	97.5	385	300	250
G6AE2	G6AE2	G6AE2	G6AE2	29	29	29	29	99	99	99	99	92.414	88.396	92.414	88.396	MALE	MALE	MALE	MALE	0.190926	0.119821	0.256235	0.0795544	69.9132	54.243	73.1276	69.5114	0.656462	0.577053	0.64147	0.57211	0.00472813	0.00397614	0.00496278	0.00250627	105	157.5	87.5	277.5
G6AE2	G6AE2	G6AE2	G6AE2	29	29	29	29	99	99	99	99	92.414	88.396	92.414	88.396	MALE	MALE	MALE	MALE	0.225592	0.113077	0.253095	0.126212	54.6448	32.144	62.6808	38.5728	0.670488	0.50225	0.575053	0.50422	0.00558659	0.00375235	0.00490196	0.00397614	97.5	202.5	95	175
G6AE2	G6AE2	G6AE2	G6AE2	29	29	29	29	99	99	99	99	92.414	88.396	92.414	88.396	MALE	MALE	MALE	MALE	0.197946	0.105183	0.266141	0.116914	31.7422	24.5098	67.5024	29.7332	0.389475	0.398533	0.633825	0.447116	0.00490196	0.0034904	0.00515464	0.00368324	122.5	225	87.5	205
G6AE2		G6AE2		29		29		99		99		90.8068		92.414		MALE		MALE		0.18673		0.296732				43.7962				0.612534		0.0031348		0.00574713		242.5		102.5
G6AE2		G6AE2		29		29		99		99		90.8068		90.8068		MALE		MALE		0.244126		0.163754		28.5278		14.063		0.372912		0.319614		0.00409836		0.00260417		167.5		340
G6AE2		G6AE2		29		29		99		99		90.8068		90.8068		MALE		MALE		0.0874055		0.221414		73.9312		26.117		0.285449		0.293449		0.00146735		0.00352113		422.5		195
G6AE2		G6AE2		29		29		99		99		90.8068		90.8068		MALE		MALE		0.262988		0.250027		61.8772		70.315		0.641215		0.524739		0.00441501		0.00397614		130		117.5
G6AE2		G6AE2		29		29		99		99		90.8068		90.8068		MALE		MALE		0.183848		0.240465		68.306		53.8412		0.519437		0.4018		0.00308642		0.00382409		192.5		127.5
G6AE2		G6AE2		29		29		99		99		90.8068		90.8068		MALE		MALE		0.295617		0.242786		38.171		62.6808		0.468356		0.526729		0.00496278		0.003861		120		140
G6AE2		G6AE2		29		29		99		99		90.8068		90.8068		MALE		MALE		0.143881		0.257712		65.4934		32.144		0.3333		0.371607		0.00241546		0.00409836		217.5		157.5
G6AE2		G6AE2		29		29		99		99		90.8068		90.8068		MALE		MALE		0.244126		0.452386		69.1096		12.8576		0.557335		0.217925		0.00409836		0.00719424		120		80
G6AE2		G6AE2		29		29		99		99		90.8068		90.8068		MALE		MALE		0.189703		0.238188		54.6448		69.5114		0.407797		0.528604		0.00318471		0.00378788		180		132.5
G6AE2		G6AE2		29		29		99		99		92.414		90.8068		MALE		MALE		0.287682		0.274593		68.7078		53.8412		0.630347		0.452447		0.00431965		0.00436681		122.5		110
G6AE2		G6AE2		29		29		99		99		92.414		92.414		MALE		MALE		0.30067		0.294621		77.5474		69.1096		0.695492		0.680883		0.00451467		0.00478469		110		107.5
G6AE2		G6AE2		29		29		99		99		92.414		92.414		MALE		MALE		0.290822		0.244834		73.1276		76.342		0.627705		0.655296		0.00436681		0.00397614		112.5		135
G6AE2		G6AE2		29		29		99		99		92.414		92.414		MALE		MALE		0.245298		0.281168		71.9222		75.1366		0.568555		0.618408		0.00368324		0.00456621		145		97.5
G6AE2		G6AE2		29		29		99		99		92.414		92.414		MALE		MALE		0.147505		0.233242		40.18		71.9222		0.377277		0.482699		0.00221484		0.00378788		345		115
G6AE2		G6AE2		29		29		99		99		92.414		92.414		MALE		MALE		0.219074		0.294621		65.0916		36.5638		0.504586		0.494105		0.00328947		0.00478469		175		135
G6AE2		G6AE2		29		29		99		99		90.405		92.414		MALE		MALE		0.260542		0.1164		69.5114		66.297		0.609749		0.476957		0.00446429		0.00189036		110		390
G6AE2		G6AE2		29		29		99		99		90.405		90.405		MALE		MALE		0.252101		0.188022		69.1096		71.1186		0.634033		0.585338		0.00431965		0.0042735		122.5		112.5
G6AE2		G6AE2		29		29		99		99		90.405		90.405		MALE		MALE		0.260542		0.190052		45.4034		67.1006		0.496212		0.563871		0.00446429		0.00431965		132.5		112.5
G6AE2		G6AE2		29		29		99		99		90.405		90.405		MALE		MALE		0.14097		0.198633		67.1006		58.261		0.435718		0.511061		0.00241546		0.00451467		260		107.5
G6AE2		G6AE2		29		29		99		99		90.405		90.405		MALE		MALE		0.254853		0.118431		26.5188		54.6448		0.4312		0.27119		0.00436681		0.00269179		167.5		170
G6AE2		G6AE2		29		29		99		99		90.405		90.405		MALE		MALE		0.144459		0.180316		20.8936		39.7782		0.264476		0.446946		0.00247525		0.00409836		325		155
G6AE2		G6AE2		29		29		99		99		90.405		90.405		MALE		MALE		0.286086		0.135794		15.2684		34.9566		0.221281		0.300057		0.00490196		0.00308642		135		207.5
G6AE2		G6AE2		29		29		99		99		90.405		90.405		MALE		MALE		0.188872		0.078009		54.6448		57.4574		0.440684		0.445406		0.00323625		0.00177305		185		435
G6AE2		G6AE2		29		29		99		99		88.396		90.405		MALE		MALE		0.134998		0.152239		64.288		34.5548		0.529119		0.332258		0.00397614		0.00346021		130		185
G6AE2		G6AE2		29		29		99		99		88.396		88.396		MALE		MALE		0.155032		0.107174		59.4664		63.4844		0.600671		0.556881		0.00456621		0.0040568		120		132.5
G6AE2		G6AE2		29		29		99		99		88.396		88.396		MALE		MALE		0.151572		0.129502		23.3044		46.207		0.325936		0.550083		0.00446429		0.00490196		152.5		120
G6AE2		G6AE2		29		29		99		99		88.396		88.396		MALE		MALE		0.131089		0.0526787		21.6972		59.0646		0.20373		0.44916		0.003861		0.00199402		152.5		370
G6AE2		G6AE2		29		29		99		99		88.396		88.396		MALE		MALE		0.158655		0.115364		50.225		43.3944		0.548907		0.389187		0.0046729		0.00436681		122.5		117.5
G6AE2		G6AE2		29		29		99		99		88.396		88.396		MALE		MALE		0.137737		0.0938485		32.144		31.3404		0.449566		0.308772		0.0040568		0.0035524		175		180
G6AE2		G6AE2		29		29		99		99		88.396		88.396		MALE		MALE		0.11955		0.0982095		25.3134		28.9296		0.429041		0.31617		0.00352113		0.00371747		225		177.5
G6AE3	G6AE3	G6AE3	G6AE3	28	28	28	28	100	100	100	100	97.2356	97.2356	97.2356	97.2356	MALE	MALE	MALE	MALE	0.410119	0.427167	0.420769	0.419156	81.9672	83.5744	89.6014	81.5654	0.827952	0.823393	0.785977	0.8036	0.00414079	0.00431965	0.00414079	0.00431965	142.5	130	127.5	130
G6AE3	G6AE3	G6AE3	G6AE3	28	28	28	28	100	100	100	100	97.2356	97.2356	97.2356	97.2356	MALE	MALE	MALE	MALE	0.457477	0.456763	0.492086	0.469902	82.7708	81.1636	81.1636	73.9312	0.857728	0.863443	0.841074	0.854696	0.00461894	0.00461894	0.00484262	0.00484262	120	122.5	110	120
G6AE3	G6AE3	G6AE3	G6AE3	28	28	28	28	100	100	100	100	97.2356	97.2356	97.2356	97.2356	MALE	MALE	MALE	MALE	0.427835	0.484751	0.463998	0.487612	92.8158	93.2176	96.0302	95.2266	0.814174	0.991677	0.881011	0.938193	0.00431965	0.00490196	0.00456621	0.00502513	117.5	110	110	97.5
G6AE3	G6AE3	G6AE3	G6AE3	28	28	28	28	100	100	100	100	97.2356	97.2356	97.2356	97.2356	MALE	MALE	MALE	MALE	0.545695	0.530237	0.517128	0.513411	93.6194	94.423	94.0212	90.405	0.995951	1.06093	0.86258	0.961755	0.00550964	0.00536193	0.00508906	0.00529101	87.5	97.5	87.5	95
G6AE3	G6AE3	G6AE3	G6AE3	28	28	28	28	100	100	100	100	97.2356	98.0392	98.0392	98.0392	MALE	MALE	MALE	MALE	0.497707	0.565365	0.354757	0.542084	98.2379	92.0122	91.2086	88.7978	0.861736	1.0056	0.996815	0.997728	0.00502513	0.00558659	0.00550964	0.00574713	85	87.5	90	85
G6AE3	G6AE3	G6AE3	G6AE3	28	28	28	28	100	100	100	100	98.0392	98.0392	98.0392	98.0392	MALE	MALE	MALE	MALE	0.57026	0.565365	0.345246	0.519683	95.6284	91.2086	94.8248	87.9942	1.01732	1.02482	0.98264	1.01727	0.00566572	0.00558659	0.00536193	0.00550964	82.5	90	90	95
G6AE3	G6AE3	G6AE3	G6AE3	28	28	28	28	100	100	100	100	98.0392	98.0392	98.0392	98.0392	MALE	MALE	MALE	MALE	0.539683	0.565365	0.269408	0.512623	93.2176	91.2086	95.9939	91.2086	0.991677	1.11912	0.623337	1.02482	0.00536193	0.00558659	0.0041841	0.00543478	92.5	97.5	85	95
G6AE3	G6AE3	G6AE3	G6AE3	28	28	28	28	100	100	100	100	98.0392	98.0392	98.0392	98.0392	MALE	MALE	MALE	MALE	0.55455	0.528461	0.499135	0.534405	95.6284	97.2356	93.6194	88.396	0.990968	1.00762	0.922359	1.02192	0.00550964	0.00522193	0.00775194	0.00566572	85	95	27.5	90
G6AE3	G6AE3	G6AE3	G6AE3	28	28	28	28	100	100	100	100	98.0392	95.6284	95.6284	95.6284	MALE	MALE	MALE	MALE	0.525592	0.454614	0.428554	0.400408	100.852	83.5744	84.7798	82.369	0.946965	0.994933	0.81519	0.755679	0.00522193	0.00515464	0.00484262	0.00461894	85	110	102.5	107.5
G6AE3	G6AE3	G6AE3	G6AE3	28	28	28	28	100	100	100	100	95.6284	95.6284	95.6284	95.6284	MALE	MALE	MALE	MALE	0.449009	0.407368	0.395073	0.414777	85.5834	84.378	89.1996	83.9762	0.910462	0.948067	0.799996	0.848244	0.00522193	0.00461894	0.00446429	0.00478469	97.5	127.5	112.5	110
G6AE3	G6AE3	G6AE3	G6AE3	28	28	28	28	100	100	100	100	95.6284	95.6284	95.6284	95.6284	MALE	MALE	MALE	MALE	0.392626	0.421986	0.462122	0.409874	85.1816	89.1996	82.369	77.5474	0.781483	0.901006	0.83201	0.8036	0.00456621	0.00478469	0.00522193	0.00472813	110	110	92.5	115
G6AE3	G6AE3	G6AE3	G6AE3	28	28	28	28	100	100	100	100	95.6284	95.6284	95.6284	95.6284	MALE	MALE	MALE	MALE	0.432086	0.412127	0.404093	0.446847	87.9942	83.5744	85.5834	80.36	0.936109	0.966178	0.822917	0.878251	0.00502513	0.0046729	0.00456621	0.00515464	105	127.5	115	102.5
G6AE3	G6AE3	G6AE3	G6AE3	28	28	28	28	100	100	100	100	95.6284	96.432	96.432	96.432	MALE	MALE	MALE	MALE	0.388195	0.124374	0.118739	0.253347	83.5744	68.306	71.1186	22.5008	0.8036	0.61261	0.477306	0.381369	0.00451467	0.00145666	0.00140056	0.00294985	117.5	575	565	280
G6AE3	G6AE3	G6AE3	G6AE3	28	28	28	28	100	100	100	100	95.6284	96.432	96.432	96.432	MALE	MALE	MALE	MALE	0.443223	0.349928	0.362307	0.273518	85.1816	81.1636	79.5564	70.7168	0.906187	0.74462	0.783807	0.752306	0.00515464	0.00409836	0.0042735	0.00318471	100	135	132.5	220
G6AE3	G6AE3	G6AE3	G6AE3	28	28	28	28	100	100	100	100	96.432	96.432	96.432	96.432	MALE	MALE	MALE	MALE	0.348417	0.349928	0.324206	0.375043	23.7062	65.8952	74.333	77.5474	0.282217	0.740396	0.576225	0.711444	0.0040568	0.00409836	0.00382409	0.00436681	162.5	155	132.5	120
G6AE3	G6AE3	G6AE3	G6AE3	28	28	28	28	100	100	100	100	96.432	96.432	96.432	96.432	MALE	MALE	MALE	MALE	0.263047	0.368823	0.378481	0.34149	84.378	87.1906	82.369	69.5114	0.654093	0.799914	0.738735	0.739483	0.00306279	0.00431965	0.00446429	0.00397614	197.5	122.5	112.5	157.5
G6AE3	G6AE3	G6AE3	G6AE3	28	28	28	28	100	100	100	100	96.432	94.8248	94.8248	96.432	MALE	MALE	MALE	MALE	0.421004	0.090874	0.114061	0.379182	69.9132	45.0016	40.18	83.5744	0.724489	0.312511	0.289065	0.717377	0.00490196	0.00194553	0.00223964	0.00441501	107.5	370	307.5	110
G6AE3	G6AE3	G6AE3	G6AE3	28	28	28	28	100	100	100	100	96.432	94.8248	94.8248	94.8248	MALE	MALE	MALE	MALE	0.310614	0.0748546	0.068915	0.156591	87.5924	48.6178	73.1276	62.279	0.679011	0.517211	0.322859	0.432493	0.00361664	0.00160256	0.00135318	0.00250627	147.5	530	512.5	255
G6AE3	G6AE3	G6AE3	G6AE3	28	28	28	28	100	100	100	100	96.432	94.8248	94.8248	94.8248	MALE	MALE	MALE	MALE	0.383414	0.183895	0.204531	0.103444	83.1726	87.5924	83.9762	33.3494	0.670747	0.768354	0.650978	0.305958	0.00446429	0.00393701	0.00401606	0.00165563	100	140	120	495
G6AE3	G6AE3	G6AE3	G6AE3	28	28	28	28	100	100	100	100	94.8248	94.8248	94.8248	94.8248	MALE	MALE	MALE	MALE	0.0677128	0.152396	0.1911	0.133933	51.4304	73.5294	63.0826	78.7528	0.339475	0.548727	0.462144	0.661788	0.00278552	0.00326264	0.00375235	0.00214362	207.5	172.5	130	347.5
G6AE3	G6AE3	G6AE3	G6AE3	28	28	28	28	100	100	100	100	94.8248	94.8248	94.8248	94.8248	MALE	MALE	MALE	MALE	0.0419843	0.160238	0.180917	0.248429	46.207	45.0016	41.7872	81.1636	0.265557	0.42255	0.456691	0.573594	0.00172712	0.00343053	0.0035524	0.00397614	405	185	190	110
G6AE3	G6AE3	G6AE3	G6AE3	28	28	28	28	100	100	100	100	94.8248	94.8248	94.8248	94.8248	MALE	MALE	MALE	MALE	0.0466134	0.0642935	0.0657986	0.189909	87.1906	47.0106	61.0736	62.279	0.638759	0.487156	0.350998	0.534584	0.00191755	0.00137646	0.00129199	0.00303951	385	630	600	212.5
G6AE3	G6AE3	G6AE3	G6AE3	28	28	28	28	100	100	100	100	94.8248	99.2446	99.2446	94.8248	MALE	MALE	MALE	MALE	0.102786	0.50201	0.446837	0.0977776	77.9492	97.9744	95.2266	38.9746	0.604257	0.790116	0.938193	0.320779	0.00422833	0.00496278	0.00515464	0.00156495	107.5	77.5	92.5	517.5
G6AE3	G6AE3	G6AE3	G6AE3	28	28	28	28	100	100	100	100	94.8248	99.2446	99.2446	94.8248	MALE	MALE	MALE	MALE	0.0701556	0.514784	0.441152	0.102175	69.1096	100.852	98.8428	55.0466	0.441595	1.0451	0.906815	0.403272	0.002886	0.00508906	0.00508906	0.00163532	190	100	87.5	475
G6AE3	G6AE3	G6AE3	G6AE3	28	28	28	28	100	100	100	100	94.8248	99.2446	99.2446	99.2446	MALE	MALE	MALE	MALE	0.046391	0.50201	0.452671	0.49759	24.5098	93.6194	87.1906	92.0122	0.291783	1.08231	0.880713	0.884733	0.0019084	0.00496278	0.00522193	0.00515464	440	115	92.5	90
G6AE3	G6AE3	G6AE3	G6AE3	28	28	28	28	100	100	100	100	94.8248	98.441	99.2446	99.2446	MALE	MALE	MALE	MALE	0.0544432	0.163308	0.512938	0.49759	33.3494	55.0466	83.9762	90.0032	0.374712	0.426718	0.999717	0.8451	0.00223964	0.00243013	0.00591716	0.00515464	357.5	282.5	85	87.5
G6AE3	G6AE3	G6AE3	G6AE3	28	28	28	28	100	100	100	100	94.8248	98.441	98.441	99.2446	MALE	MALE	MALE	MALE	0.0848478	0.175003	0.151603	0.504086	26.117	59.8682	59.0646	90.0032	0.181368	0.604729	0.457865	0.983642	0.0034904	0.00260417	0.00263852	0.00522193	142.5	285	250	100
G6AE3	G6AE3	G6AE3	G6AE3	28	28	28	28	100	100	100	100	99.2446	98.441	98.441	98.441	MALE	MALE	MALE	MALE	0.452746	0.226648	0.146762	0.155778	93.2176	55.4484	55.8502	55.0466	0.941592	0.589877	0.409159	0.443924	0.00478469	0.00337268	0.00255428	0.0026738	110	202.5	255	250
G6AE3	G6AE3	G6AE3	G6AE3	28	28	28	28	100	100	100	100	99.2446	98.441	98.441	98.441	MALE	MALE	MALE	MALE	0.475497	0.221056	0.133933	0.13502	99.2446	59.0646	71.5204	51.0286	0.931874	0.541877	0.488194	0.55769	0.00502513	0.00328947	0.002331	0.0023175	92.5	195	282.5	340
G6AE3	G6AE3	G6AE3	G6AE3	28	28	28	28	100	100	100	100	99.2446	98.441	98.441	98.441	MALE	MALE	MALE	MALE	0.49412	0.196782	0.213596	0.173138	96.432	65.8952	45.4034	71.9222	0.927231	0.565624	0.540517	0.526903	0.00522193	0.00292826	0.00371747	0.00297177	87.5	225	185	200
G6AE3	G6AE3	G6AE3	G6AE3	28	28	28	28	100	100	100	100	99.2446	98.441	98.441	98.441	MALE	MALE	MALE	MALE	0.500656	0.202718	0.180117	0.214589	94.3891	67.5024	67.5024	44.198	0.623031	0.523274	0.453036	0.542307	0.00529101	0.00301659	0.0031348	0.00368324	37.5	202.5	170	190
G6AE3	G6AE3	G6AE3	G6AE3	28	28	28	28	100	100	100	100	98.441	98.8428	98.441	98.441	MALE	MALE	MALE	MALE	0.152815	0.477334	0.153629	0.169363	65.0916	91.2086	74.333	63.0826	0.422673	0.996815	0.42115	0.565763	0.00250627	0.00522193	0.0026738	0.00290698	245	100	197.5	232.5
G6AE3	G6AE3	G6AE3	G6AE3	28	28	28	28	100	100	100	100	98.441	98.8428	98.441	98.441	MALE	MALE	MALE	MALE	0.142129	0.483648	0.224005	0.178441	58.6628	99.2446	49.4214	70.7168	0.407381	1.11511	0.453407	0.634231	0.002331	0.00529101	0.00389864	0.00306279	285	100	147.5	215
G6AE3	G6AE3	G6AE3	G6AE3	28	28	28	28	100	100	100	100	98.441	98.8428	98.8428	98.441	MALE	MALE	MALE	MALE	0.212821	0.540885	0.475497	0.184079	58.6628	89.1996	89.6014	51.0286	0.678183	1.16601	0.905065	0.542857	0.0034904	0.00591716	0.00502513	0.00315956	200	92.5	100	222.5
G6AE3	G6AE3	G6AE3	G6AE3	28	28	28	28	100	100	100	100	98.441	96.432	98.8428	98.8428	MALE	MALE	MALE	MALE	0.185329	0.124788	0.49412	0.472856	62.6808	43.7962	93.2176	89.1996	0.575053	0.375933	0.9184	0.948932	0.00303951	0.00220264	0.00522193	0.00508906	220	337.5	90	102.5
G6AE3	G6AE3	G6AE3	G6AE3	28	28	28	28	100	100	100	100	98.441	96.432	98.8428	98.8428	MALE	MALE	MALE	MALE	0.178545	0.187906	0.51426	0.49162	67.9042	91.2086	92.414	86.387	0.497467	0.818014	1.03836	0.97064	0.00292826	0.00331675	0.00543478	0.00529101	205	190	95	100
G6AE3	G6AE3	G6AE3	G6AE3	28	28	28	28	100	100	100	100	98.441	96.432	98.8428	98.8428	MALE	MALE	MALE	MALE	0.189652	0.232188	0.528625	0.526438	69.5114	78.7528	92.0122	87.9942	0.609749	0.722503	0.953494	0.988699	0.00311042	0.00409836	0.00558659	0.00566572	207.5	135	82.5	87.5
G6AE3	G6AE3	G6AE3	G6AE3	28	28	28	28	100	100	100	100	98.441	96.432	96.432	98.8428	MALE	MALE	MALE	MALE	0.185329	0.229833	0.168779	0.485202	59.0646	79.1546	15.6702	86.7888	0.476327	0.694339	0.3198	0.855062	0.00303951	0.0040568	0.00290698	0.00522193	205	132.5	295	90
G6AE3	G6AE3	G6AE3	G6AE3	28	28	28	28	100	100	100	100	98.8428	96.432	96.432	96.432	MALE	MALE	MALE	MALE	0.481021	0.201257	0.328952	0.182113	91.2086	58.261	32.144	60.27	1.02482	0.714859	0.341957	0.506471	0.00515464	0.0035524	0.00566572	0.00301659	105	200	82.5	212.5
G6AE3	G6AE3	G6AE3	G6AE3	28	28	28	28	100	100	100	100	98.8428	96.432	96.432	96.432	MALE	MALE	MALE	MALE	0.468935	0.158917	0.235538	0.12538	95.6284	47.8142	79.5564	65.0916	0.965943	0.44896	0.747008	0.597171	0.00502513	0.00280505	0.0040568	0.00207684	100	250	140	372.5
G6AE3	G6AE3	G6AE3	G6AE3	28	28	28	28	100	100	100	100	98.8428	99.0437	96.432	96.432	MALE	MALE	MALE	MALE	0.544129	0.371416	0.230855	0.255266	91.6104	99.2446	82.369	81.1636	1.05908	1.00247	0.582113	0.727925	0.0058309	0.00451467	0.00397614	0.00422833	85	122.5	110	125
G6AE3	G6AE3	G6AE3	G6AE3	28	28	28	28	100	100	100	100	98.8428	99.0437	96.432	96.432	MALE	MALE	MALE	MALE	0.481021	0.424065	0.242929	0.244911	92.8158	99.6464	76.7438	75.9402	0.87151	1.06007	0.618902	0.730194	0.00515464	0.00515464	0.0041841	0.0040568	87.5	100	115	142.5
G6AE3	G6AE3	G6AE3	G6AE3	28	28	28	28	100	100	100	100	96.432	99.0437	96.432	96.432	MALE	MALE	MALE	MALE	0.227325	0.441118	0.215837	0.216382	54.6448	100.45	52.6358	73.1276	0.525431	1.16127	0.518579	0.545728	0.00337268	0.00536193	0.00371747	0.00358423	192.5	100	167.5	145
G6AE3	G6AE3	G6AE3	G6AE3	28	28	28	28	100	100	100	100	96.432	99.0437	96.432	96.432	MALE	MALE	MALE	MALE	0.129246	0.543027	0.170015	0.201908	83.5744	76.342	53.8412	54.6448	0.612267	1.41374	0.409439	0.490088	0.00191755	0.00660066	0.00292826	0.00334448	385	97.5	210	187.5
G6AE3	G6AE3	G6AE3	G6AE3	28	28	28	28	100	100	100	100	96.432	99.6464	99.0437	99.0437	MALE	MALE	MALE	MALE	0.29758	0.28152	0.484981	0.474084	82.369	73.1276	96.432	92.8158	0.70703	0.64147	0.905465	0.937533	0.00441501	0.00323625	0.00484262	0.00496278	110	195	100	102.5
G6AE3	G6AE3	G6AE3	G6AE3	28	28	28	28	100	100	100	100	96.432	99.6464	99.0437	99.0437	MALE	MALE	MALE	MALE	0.268	0.326415	0.51623	0.486147	84.7798	77.5474	97.2356	99.2446	0.712435	0.783307	0.934958	0.931874	0.00397614	0.00375235	0.00515464	0.00508906	132.5	167.5	90	90
G6AE3	G6AE3	G6AE3	G6AE3	28	28	28	28	100	100	100	100	96.432	99.6464	99.0437	99.0437	MALE	MALE	MALE	MALE	0.300902	0.342479	0.55949	0.549011	56.252	80.36	95.6284	88.7978	0.650312	0.737248	0.990968	0.944657	0.00446429	0.00393701	0.00558659	0.00574713	137.5	145	82.5	80
G6AE3	G6AE3	G6AE3	G6AE3	28	28	28	28	100	100	100	100	96.432	99.6464	99.6464	99.6464	MALE	MALE	MALE	MALE	0.19737	0.406494	0.270723	0.31365	65.8952	90.0032	77.1456	73.5294	0.434952	0.909123	0.634943	0.690417	0.00292826	0.0046729	0.00315956	0.00340136	190	115	195	187.5
G6AE3	G6AE3	G6AE3	G6AE3	28	28	28	28	100	100	100	100	99.0437	99.6464	99.6464	99.6464	MALE	MALE	MALE	MALE	0.440329	0.416219	0.304383	0.363044	96.432	83.5744	83.5744	77.9492	0.864861	0.844186	0.702306	0.749512	0.00456621	0.00478469	0.0035524	0.00393701	107.5	110	162.5	150
G6AE3	G6AE3	G6AE3	G6AE3	28	28	28	28	100	100	100	100	99.0437	99.2446	99.6464	99.6464	MALE	MALE	MALE	MALE	0.490748	0.55848	0.327663	0.394073	98.0392	96.8338	86.387	81.1636	1.01595	1.22574	0.682901	0.819834	0.00508906	0.00543478	0.00382409	0.0042735	100	105	135	135
G6AE3	G6AE3	G6AE3	G6AE3	28	28	28	28	100	100	100	100	99.0437	99.2446	99.6464	99.6464	MALE	MALE	MALE	MALE	0.503561	0.590577	0.420019	0.435996	100.852	99.2446	86.387	87.5924	0.969729	1.25626	0.851103	0.842235	0.00522193	0.00574713	0.00490196	0.00472813	87.5	95	102.5	107.5
G6AE3	G6AE3	G6AE3	G6AE3	28	28	28	28	100	100	100	100	99.0437	99.2446	99.6464	99.2446	MALE	MALE	MALE	MALE	0.554207	0.617179	0.420019	1.00551	94.8248	95.99	80.7618	77.9492	1.00877	1.10971	0.815776	0.986699	0.00574713	0.00600601	0.00490196	0.010101	80	80	105	20
G6AE3	G6AE3	G6AE3	G6AE3	28	28	28	28	100	100	100	100	99.6464	99.2446	99.2446	99.2446	MALE	MALE	MALE	MALE	0.285065	0.617179	0.535906	0.556123	73.9312	102.861	101.655	98.441	0.596219	1.39001	1.02682	1.04724	0.00321027	0.00600601	0.00515464	0.00558659	187.5	92.5	95	85
G6AE3	G6AE3	G6AE3	G6AE3	28	28	28	28	100	100	100	100	99.6464	98.8428	99.2446	99.2446	MALE	MALE	MALE	MALE	0.296983	0.467744	0.615182	0.580443	79.5564	81.9672	100.048	96.0302	0.668541	0.947598	1.09342	1.0216	0.00334448	0.00508906	0.00591716	0.0058309	180	110	77.5	77.5
G6AE3	G6AE3	G6AE3	G6AE3	28	28	28	28	100	100	100	100	99.6464	98.8428	99.2446	99.2446	MALE	MALE	MALE	MALE	0.3332	0.467744	0.597504	0.580443	85.5834	96.432	99.2446	94.8248	0.690189	0.999295	1.02844	1.03634	0.00375235	0.00508906	0.00574713	0.0058309	142.5	100	77.5	80
G6AE3	G6AE3	G6AE3	G6AE3	28	28	28	28	100	100	100	100	99.6464	98.8428	98.8428	98.8428	MALE	MALE	MALE	MALE	0.367693	0.528228	0.434657	0.474807	91.2086	93.2176	88.396	82.369	0.800075	1.01877	0.870897	0.853565	0.00414079	0.00574713	0.0046729	0.00515464	127.5	82.5	112.5	97.5
G6AE3	G6AE3	G6AE3	G6AE3	28	28	28	28	100	100	100	100	99.6464	98.8428	98.8428	98.8428	MALE	MALE	MALE	MALE	0.44622	0.513473	0.505526	0.457135	85.9852	87.1906	94.423	81.9672	0.807373	1.03798	1.03195	0.9758	0.00502513	0.00558659	0.00543478	0.00496278	92.5	95	92.5	117.5
G6AE3	G6AE3	G6AE3	G6AE3	28	29	28	28	100	101	100	100	99.2446	98.0392	98.8428	98.8428	MALE	MALE	MALE	MALE	0.535222	0.560664	0.519646	0.514596	93.2176	101.254	92.8158	95.2266	0.991677	1.13768	0.961822	0.986804	0.00508906	0.00543478	0.00558659	0.00558659	102.5	95	82.5	82.5
G6AE3	G6AE3	G6AE3	G6AE3	28	29	28	28	100	101	100	100	99.2446	98.0392	98.8428	98.8428	MALE	MALE	MALE	MALE	0.587548	0.648819	0.512489	0.521885	100.852	102.861	87.9942	87.1906	1.07289	1.2621	0.936109	1.03798	0.00558659	0.00628931	0.00550964	0.00566572	85	77.5	87.5	92.5
G6AE3	G6AE3	G6AE3	G6AE3	28	29	29	28	100	101	101	100	99.2446	98.0392	98.0392	98.8428	MALE	MALE	MALE	MALE	0.622314	0.629038	0.53467	0.493902	100.852	102.459	104.87	87.1906	1.07289	1.21975	0.984693	0.97967	0.00591716	0.00609756	0.00529101	0.00536193	75	80	82.5	97.5
G6AE3	G6AE3	G6AE3	G6AE3	28	29	29	29	100	101	101	101	99.2446	98.0392	98.0392	98.0392	MALE	MALE	MALE	MALE	0.579455	0.53467	0.645704	0.613091	106.477	90.405	101.254	100.45	0.999784	0.988033	1.13768	1.12865	0.00550964	0.00529101	0.00638978	0.00574713	75	97.5	67.5	85
G6AE3	G6AE3	G6AE3	G6AE3	28	29	29	29	100	101	101	101	98.8428	98.0392	98.0392	98.0392	MALE	MALE	MALE	MALE	0.496056	0.549199	0.625713	0.692714	82.7708	91.2086	98.441	97.2356	0.930009	0.921299	1.07586	1.09253	0.00536193	0.00543478	0.00619195	0.00649351	97.5	85	70	65
G6AE3	G6AE3	G6AE3	G6AE3	28	29	29	29	100	101	101	101	98.8428	98.0392	98.0392	98.0392	MALE	MALE	MALE	MALE	0.427318	0.616175	0.514263	0.63123	95.6284	95.2266	94.8248	97.2356	0.942152	1.10089	0.957826	1.06268	0.00461894	0.00609756	0.00508906	0.00591716	115	77.5	97.5	77.5
G6AE3	G6AE3	G6AE3	G6AE3	28	29	29	29	100	101	101	101	98.8428	98.0392	98.0392	98.0392	MALE	MALE	MALE	MALE	0.539443	0.625713	0.556764	0.535733	94.423	98.0392	92.414	93.2176	1.06093	1.10156	0.957658	1.01877	0.0058309	0.00619195	0.00550964	0.00529101	82.5	72.5	85	97.5
G6AE3	G6AE3	G6AE3	G6AE3	28	29	29	29	100	101	101	101	98.8428	98.8428	98.0392	98.0392	MALE	MALE	MALE	MALE	0.524161	0.492514	0.589229	0.581917	92.414	88.7978	99.6464	87.1906	1.03836	1.05712	1.06007	1.13975	0.00566572	0.00472813	0.0058309	0.00574713	87.5	127.5	77.5	97.5
G6AE3	G6AE3	G6AE3	G6AE3	28	29	29	29	100	101	101	101	98.8428	98.8428	98.0392	98.0392	MALE	MALE	MALE	MALE	0.489494	0.635163	0.625713	0.626957	90.0032	96.8338	98.0392	96.0302	0.957481	1.22574	1.04297	1.14322	0.00529101	0.00609756	0.00619195	0.00619195	95	85	67.5	77.5
G6AE3	G6AE3	G6AE3	G6AE3	29	29	29	29	101	101	101	101	98.0392	98.8428	98.8428	98.8428	MALE	MALE	MALE	MALE	0.544769	0.616371	0.490046	0.466993	101.655	100.048	92.414	80.36	1.05342	1.22759	0.910483	0.811717	0.00529101	0.00591716	0.0046729	0.00441501	92.5	87.5	112.5	127.5
G6AE3	G6AE3	G6AE3	G6AE3	29	29	29	29	101	101	101	101	98.0392	98.0392	98.8428	98.8428	MALE	MALE	MALE	MALE	0.618386	0.584325	0.611486	0.582776	101.254	90.405	100.852	89.1996	1.2054	1.14437	1.01871	1.0619	0.00600601	0.00609756	0.0058309	0.00550964	82.5	85	72.5	97.5
G6AE3	G6AE3	G6AE3	G6AE3	29	29	29	29	101	101	101	101	98.0392	98.0392	98.8428	98.8428	MALE	MALE	MALE	MALE	0.627812	0.550743	0.611486	0.625881	104.87	107.281	99.6464	97.6374	1.11564	1.17247	1.00653	1.06708	0.00609756	0.00574713	0.0058309	0.00591716	70	82.5	72.5	77.5
G6AE3	G6AE3	G6AE3	G6AE3	29	29	29	29	101	101	101	101	98.0392	98.0392	98.0392	98.8428	MALE	MALE	MALE	MALE	0.637531	0.632537	0.540614	0.607896	101.254	102.861	100.048	97.2356	1.13768	1.2621	1.09342	0.982178	0.00619195	0.00660066	0.0058309	0.00574713	72.5	70	80	75
G6AE3	G6AE3	G6AE3	G6AE3	29	29	29	29	101	101	101	101	98.0392	98.0392	98.0392	98.0392	MALE	MALE	MALE	MALE	0.536451	0.59337	0.532847	0.648105	94.8248	93.6194	106.075	92.8158	0.911777	1.08231	1.12846	1.07302	0.00536193	0.00619195	0.00574713	0.00619195	82.5	75	80	75
G6AE3	G6AE3	G6AE3	G6AE3	29	29	29	29	101	101	101	101	98.0392	92.414	98.0392	98.0392	MALE	MALE	MALE	MALE	0.54374	0.102538	0.602048	0.619343	89.1996	85.5834	107.682	106.879	0.974859	0.822917	1.20991	1.16807	0.00543478	0.00461894	0.00649351	0.00591716	92.5	112.5	65	77.5
G6AE3	G6AE3	G6AE3	G6AE3	29	29	29	29	101	101	101	101	98.0392	92.414	98.0392	98.0392	MALE	MALE	MALE	MALE	0.55123	0.110171	0.583115	0.668811	96.0302	89.6014	86.387	101.254	0.995132	0.841328	1.05996	1.13768	0.00550964	0.00496278	0.00628931	0.00638978	85	95	77.5	67.5
G6AE3	G6AE3	G6AE3	G6AE3	29	29	29	29	101	101	101	101	98.0392	92.414	92.414	92.414	MALE	MALE	MALE	MALE	0.629234	0.108821	0.0911533	0.329226	98.441	94.423	90.0032	86.7888	1.07586	0.907913	0.740767	0.855062	0.00628931	0.00490196	0.00451467	0.00478469	67.5	100	100	107.5
G6AE3	G6AE3	G6AE3	G6AE3	29	29	29	29	101	101	101	101	98.8428	92.414	92.414	92.414	MALE	MALE	MALE	MALE	0.451166	0.0718429	0.0989728	0.34577	88.7978	56.252	92.8158	86.7888	0.833782	0.598426	0.779965	0.834508	0.0042735	0.00323625	0.00490196	0.00502513	127.5	215	85	95
G6AE3	G6AE3	G6AE3	G6AE3	29	29	29	29	101	101	101	101	98.8428	92.414	92.414	92.414	MALE	MALE	MALE	MALE	0.581669	0.0810199	0.100201	0.276338	99.2446	32.5458	90.0032	81.5654	1.11511	0.471678	0.789502	0.529645	0.00550964	0.00364964	0.00496278	0.00401606	92.5	205	87.5	95
G6AE3	G6AE3	G6AE3	G6AE3	29	29	29	29	101	101	101	101	98.8428	92.414	92.414	92.414	MALE	MALE	MALE	MALE	0.624692	0.057068	0.0704728	0.195756	98.8428	33.7512	43.7962	52.234	1.08025	0.507537	0.453847	0.603861	0.00591716	0.00257069	0.0034904	0.00284495	77.5	322.5	190	265
G6AE3	G6AE3	G6AE3	G6AE3	29	29	29	29	101	101	101	101	98.8428	98.0392	92.414	92.414	MALE	MALE	MALE	MALE	0.606741	0.120567	0.0723672	0.102852	104.87	63.4844	26.9206	65.4934	1.0332	0.641257	0.437733	0.4323	0.00574713	0.00132188	0.00358423	0.00149477	72.5	657.5	217.5	517.5
G6AE3	G6AE3	G6AE3	G6AE3	29	29	29	29	101	101	101	101	98.0392	98.0392	92.414	98.0392	MALE	MALE	MALE	MALE	0.608049	0.362658	0.0525793	0.474753	94.423	82.369	17.6792	21.2954	1.03195	0.853565	0.299647	0.195371	0.00591716	0.00397614	0.00260417	0.00558659	77.5	155	325	70
G6AE3	G6AE3	G6AE3	G6AE3	29	29	29	29	101	101	101	101	98.0392	98.0392	98.0392	98.0392	MALE	MALE	MALE	MALE	0.566173	0.476285	0.153489	0.250681	108.486	89.1996	30.9386	76.7438	0.972969	0.974859	0.432708	0.644906	0.00550964	0.00522193	0.00169779	0.00294985	70	100	517.5	220
G6AE3	G6AE3	G6AE3	G6AE3	29	29	29	29	101	101	101	101	98.0392	98.0392	98.0392	98.0392	MALE	MALE	MALE	MALE	0.678286	0.531829	0.0826371	0.392521	105.673	79.9582	71.9222	80.7618	1.18734	0.898407	0.459567	0.795683	0.00660066	0.0058309	0.000914077	0.00461894	62.5	82.5	937.5	115
G6AE3	G6AE3	G6AE3	G6AE3	29	29	29	29	101	101	101	101	98.0392	98.0392	98.0392	98.0392	MALE	MALE	MALE	MALE	0.667275	0.470147	0.359463	0.488395	100.45	91.2086	83.5744	79.5564	1.09781	0.945167	0.660667	0.846345	0.00649351	0.00515464	0.00397614	0.00574713	62.5	97.5	125	80
G6AE3	G6AE3	G6AE3	G6AE3	29	29	29	29	101	101	101	101	92.414	98.441	98.0392	98.0392	MALE	MALE	MALE	MALE	0.0623139	0.554113	0.484745	0.455661	90.0032	84.7798	83.5744	80.36	0.8451	1.07316	0.844186	0.772692	0.00496278	0.00543478	0.00536193	0.00536193	95	105	87.5	82.5
G6AE3	G6AE3	G6AE3	G6AE3	29	29	29	29	101	101	101	101	92.414	98.441	98.0392	98.441	MALE	MALE	MALE	MALE	0.0579965	0.603294	0.484745	0.590031	99.2446	95.2266	84.7798	86.387	0.80036	1.06996	0.743682	1.12924	0.00461894	0.00591716	0.00536193	0.00600601	92.5	80	72.5	90
G6AE3	G6AE3	G6AE3	G6AE3	29	29	29	29	101	101	101	101	92.414	98.441	98.0392	98.441	MALE	MALE	MALE	MALE	0.0721624	0.612353	0.472089	0.572829	59.0646	94.423	89.6014	95.6284	0.663647	1.0916	0.769111	1.07448	0.00574713	0.00600601	0.00522193	0.0058309	85	80	75	82.5
G6AE3	G6AE3	G6AE3	G6AE3	29	29	29	29	101	101	101	101	92.414	98.441	98.441	98.441	MALE	MALE	MALE	MALE	0.0301471	0.577659	0.520927	0.581302	73.1276	99.6464	91.6104	93.6194	0.439205	1.06007	1.02933	1.08231	0.00240096	0.00566572	0.00502513	0.00591716	250	82.5	110	82.5
G6AE3	G6AE3	G6AE3	G6AE3	29	29	29	29	101	101	101	101	92.414	100.048	98.441	100.048	MALE	MALE	MALE	MALE	0.0211385	0.525104	0.595772	0.561712	52.6358	112.504	96.8338	98.441	0.518579	1.16584	1.03015	1.02011	0.0016835	0.00529101	0.00574713	0.00574713	492.5	92.5	80	77.5
G6AE3	G6AE3	G6AE3	G6AE3	29	29	29	29	101	101	101	101	92.414	100.048	98.441	100.048	MALE	MALE	MALE	MALE	0.103344	0.562292	0.595772	0.614703	14.8666	106.477	100.048	97.6374	0.358231	1.10339	1.01059	1.06708	0.00823045	0.00566572	0.00574713	0.00628931	80	80	75	67.5
G6AE3	G6AE3	G6AE3	G6AE3	29	29	29	29	101	101	101	101	98.0392	100.048	98.441	100.048	MALE	MALE	MALE	MALE	0.107932	0.644445	0.579131	0.624523	18.081	100.45	100.852	91.6104	0.262043	1.12865	0.969729	1.05908	0.001221	0.00649351	0.00558659	0.00638978	750	65	75	70
G6AE3	G6AE3	G6AE3	G6AE3	29	29	29	29	101	101	101	101	98.0392	98.8428	100.048	98.8428	MALE	MALE	MALE	MALE	0.247955	0.62172	0.48751	0.424076	28.126	94.0212	102.057	73.1276	0.258037	1.22904	1.05759	1.02276	0.00280505	0.00591716	0.00543478	0.0041841	247.5	92.5	87.5	167.5
G6AE3	G6AE3	G6AE3	G6AE3	29	29	29	29	101	101	101	101	98.0392	98.8428	100.048	98.8428	MALE	MALE	MALE	MALE	0.298132	0.660822	0.564163	0.637447	79.5564	103.664	102.28	100.048	0.682888	1.27196	0.917307	1.15663	0.00337268	0.00628931	0.00628931	0.00628931	180	77.5	47.5	72.5
G6AE3	G6AE3	G6AE3	G6AE3	29	29	29	29	101	101	101	101	98.0392	98.8428	100.048	98.8428	MALE	MALE	MALE	MALE	0.38184	0.729658	0.58248	0.669004	87.9942	101.655	97.6374	104.231	0.789186	1.28678	1.16235	1.10884	0.00431965	0.00694444	0.00649351	0.00660066	120	65	70	57.5
G6AE3	G6AE3	G6AE3	G6AE3	29	29	29	29	101	101	101	101	98.0392	98.8428	100.048	98.8428	MALE	MALE	MALE	MALE	0.508023	0.660822	0.573175	0.680229	83.9762	101.655	95.2266	97.6374	0.827352	1.17521	1.13365	1.198	0.00574713	0.00628931	0.00638978	0.00671141	72.5	72.5	72.5	67.5
G6AE3	G6AE3	G6AE3	G6AE3	29	29	29	29	101	101	101	101	98.0392	100.048	98.8428	100.048	MALE	MALE	MALE	MALE	0.449852	0.643779	0.425336	0.581897	90.405	100.45	101.655	87.9942	0.776009	1.16127	1.08144	1.11385	0.00508906	0.00638978	0.0041841	0.00591716	80	70	145	90
G6AE3	G6AE3	G6AE3	G6AE3	29	29	29	29	101	101	101	101	98.441	100.048	98.8428	100.048	MALE	MALE	MALE	MALE	0.602131	0.633656	0.649555	0.628374	97.2356	96.1794	104.066	91.6104	1.06268	1.08067	1.16928	1.02933	0.00566572	0.00628931	0.00638978	0.00638978	85	70	67.5	67.5
G6AE3	G6AE3	G6AE3	G6AE3	29	29	29	29	101	101	101	101	98.441	100.048	98.8428	100.048	MALE	MALE	MALE	MALE	0.648025	0.633656	0.70594	0.628374	96.8338	100.048	101.655	90.405	1.11947	1.15663	1.1422	1.04514	0.00609756	0.00628931	0.00694444	0.00638978	77.5	72.5	55	70
G6AE3	G6AE3	G6AE3	G6AE3	29	29	29	29	101	101	101	101	98.441	98.441	98.8428	100.048	MALE	MALE	MALE	MALE	0.577587	0.560638	0.6601	0.649113	103.664	98.0392	98.0392	93.2176	0.996773	1.20293	1.10156	1.14377	0.00543478	0.00550964	0.00649351	0.00660066	80	100	65	70
G6AE3	G6AE3	G6AE3	G6AE3	29	29	29	29	101	101	101	101	100.048	98.441	100.048	98.441	MALE	MALE	MALE	MALE	0.48555	0.620463	0.512479	0.583394	96.432	108.486	92.0122	100.852	0.974061	1.25417	0.978853	1.20062	0.00496278	0.00609756	0.00522193	0.00600601	102.5	77.5	97.5	82.5
G6AE3	G6AE3	G6AE3	G6AE3	29	29	29	29	101	101	101	101	100.048	98.441	100.048	98.441	MALE	MALE	MALE	MALE	0.562289	0.630067	0.647786	0.601456	104.468	91.6104	97.4472	98.8428	1.08257	1.23798	1.03667	1.11059	0.00574713	0.00619195	0.00660066	0.00619195	77.5	87.5	57.5	72.5
G6AE3	G6AE3	G6AE3	G6AE3	29	29	29	29	101	101	101	101	100.048	98.441	100.048	98.441	MALE	MALE	MALE	MALE	0.635314	0.611146	0.617231	0.592287	98.441	99.6464	93.6194	89.6014	1.13805	1.30257	1.11452	1.13419	0.00649351	0.00600601	0.00628931	0.00609756	67.5	90	75	85
G6AE3	G6AE3	G6AE3	G6AE3	29	29	29	29	101	101	101	101	100.048	97.2356	100.048	97.2356	MALE	MALE	MALE	MALE	0.635314	0.487045	0.63727	0.45363	99.2446	83.1726	94.0212	75.9402	1.11511	1.05282	1.15363	0.767073	0.00649351	0.00496278	0.00649351	0.00456621	65	122.5	72.5	120
G6AE3	G6AE3	G6AE3	G6AE3	29	29	29	29	101	101	101	101	98.8428	97.2356	98.441	97.2356	MALE	MALE	MALE	MALE	0.380341	0.519257	0.556016	0.518773	97.2356	94.423	102.459	85.1816	1.03442	1.0916	1.06175	0.906187	0.00368324	0.00529101	0.00522193	0.00522193	177.5	102.5	95	97.5
G6AE3	G6AE3	G6AE3	G6AE3	29	29	29	29	101	101	101	101	98.8428	97.2356	98.441	97.2356	MALE	MALE	MALE	MALE	0.620196	0.533368	0.999784	0.547356	106.879	98.8428	57.3255	91.2086	1.13701	1.14269	1.46988	0.945167	0.00600601	0.00543478	0.00938967	0.00550964	72.5	97.5	67.5	85
G6AE3	G6AE3	G6AE3	G6AE3	29	29	29	29	101	101	101	101	98.8428	97.2356	98.441	97.2356	MALE	MALE	MALE	MALE	0.717101	0.519257	0.515627	0.532681	104.066	93.6194	94.423	92.0122	1.16928	1.11452	1.0916	0.863964	0.00694444	0.00529101	0.00484262	0.00536193	55	105	120	80
G6AE3	G6AE3	G6AE3	G6AE3	29	28	29	28	101	102	101	102	98.8428	97.2356	98.441	97.2356	MALE	MALE	MALE	MALE	0.681601	0.569217	0.611937	0.755031	103.664	104.066	101.655	86.387	1.19843	1.13734	1.08144	0.895202	0.00660066	0.00529101	0.00574713	0.00732601	65	97.5	80	40
G6AE3	G6AE3	G6AE3	G6AE3	29	28	29	28	101	102	101	102	100.048	97.2356	97.2356	97.2356	MALE	MALE	MALE	MALE	0.588845	0.6273	0.400455	0.592309	97.2356	98.0392	79.1546	91.2086	1.12411	1.16713	0.820255	1.05443	0.00574713	0.0058309	0.00446429	0.00574713	87.5	87.5	127.5	87.5
G6AE3	G6AE3	G6AE3	G6AE3	29	28	29	28	101	102	101	102	100.048	97.2356	97.2356	97.2356	MALE	MALE	MALE	MALE	0.676297	0.609529	0.404974	0.575764	97.2356	105.272	87.9942	99.2446	1.15757	1.15051	0.826237	1.05579	0.00660066	0.00566572	0.00451467	0.00558659	67.5	85	115	85
G6AE3	G6AE3	G6AE3	G6AE3	29	28	29	28	101	102	101	102	100.048	95.2266	97.2356	97.2356	MALE	MALE	MALE	MALE	0.644396	0.45425	0.468417	0.618989	96.432	98.0392	95.6284	96.0302	1.148	1.01595	0.897919	1.07899	0.00628931	0.00558659	0.00522193	0.00600601	75	82.5	85	77.5
G6AE3	G6AE3	G6AE3	G6AE3	29	28	29	28	101	102	101	102	100.048	95.2266	97.2356	95.2266	MALE	MALE	MALE	MALE	0.65469	0.467303	0.494225	0.539443	101.254	94.8248	94.0212	87.9942	1.17056	1.00877	0.926317	1.01727	0.00638978	0.00574713	0.00550964	0.0058309	70	80	80	85
G6AE3	G6AE3	G6AE3	G6AE3	29	28	29	28	101	102	101	102	98.441	95.2266	97.2356	95.2266	MALE	MALE	MALE	MALE	0.607455	0.403527	0.501128	0.476879	107.281	86.387	89.1996	99.2446	1.11172	0.895202	0.924348	0.910501	0.00591716	0.00496278	0.00558659	0.00515464	72.5	105	82.5	85
G6AE3	G6AE3	G6AE3	G6AE3	29	28	28	28	101	102	102	102	98.441	95.2266	97.2356	95.2266	MALE	MALE	MALE	MALE	0.688993	0.441906	0.55949	0.496056	94.8248	81.1636	95.6284	56.6538	1.12887	0.966233	1.01732	0.851937	0.00671141	0.00543478	0.00558659	0.00536193	65	100	85	120
G6AE3	G6AE3	G6AE3	G6AE3	29	28	28	28	101	102	102	102	98.441	97.6374	97.2356	95.2266	MALE	MALE	MALE	MALE	0.573519	0.553317	0.55949	0.516841	104.87	87.9942	103.263	91.6104	1.0332	1.01727	0.99291	1.15963	0.00558659	0.00558659	0.00558659	0.00558659	77.5	92.5	75	100
G6AE3	G6AE3	G6AE3	G6AE3	29	28	28	28	101	102	102	102	97.2356	97.6374	97.2356	97.6374	MALE	MALE	MALE	MALE	0.449417	0.468292	0.610663	0.452922	83.9762	74.7348	98.0392	89.1996	0.848244	0.94601	1.07147	1.03121	0.00451467	0.00472813	0.00609756	0.00446429	122.5	132.5	72.5	137.5
G6AE3	G6AE3	G6AE3	G6AE3	29	28	28	28	101	102	102	102	97.2356	97.6374	95.2266	97.6374	MALE	MALE	MALE	MALE	0.500231	0.594857	0.574586	0.522961	94.423	102.861	93.2176	77.5474	0.978477	1.18914	1.01877	0.824972	0.00502513	0.00600601	0.0058309	0.00515464	102.5	80	80	100
G6AE3	G6AE3	G6AE3	G6AE3	29	28	28	28	101	102	102	102	97.2356	97.6374	95.2266	97.6374	MALE	MALE	MALE	MALE	0.533758	0.676066	0.535551	0.551383	96.8338	98.441	100.852	80.7618	1.00346	1.20787	0.946965	1.17046	0.00536193	0.00682594	0.00543478	0.00543478	90	65	77.5	115
G6AE3	G6AE3	G6AE3	G6AE3	29	28	28	28	101	102	102	102	97.2356	99.6464	95.2266	97.6374	MALE	MALE	MALE	MALE	0.533758	0.840332	0.542928	0.680903	98.0392	98.0392	73.5294	94.0212	0.942685	1.32485	0.850051	1.19014	0.00536193	0.00746269	0.00550964	0.00671141	82.5	60	95	70
G6AE3	G6AE3	G6AE3	G6AE3	28	28	28	28	102	102	102	102	97.2356	99.6464	95.2266	99.6464	MALE	MALE	MALE	MALE	0.548333	0.731198	0.455157	0.660384	100.048	109.691	94.423	103.664	0.917873	1.30585	0.828272	1.31221	0.00515464	0.00649351	0.00461894	0.00660066	85	70	102.5	72.5
G6AE3	G6AE3	G6AE3	G6AE3	28	28	28	28	102	102	102	102	97.2356	98.8428	97.6374	99.6464	MALE	MALE	MALE	MALE	0.611359	0.708123	0.619343	0.671464	99.2446	98.0392	85.5834	99.2446	1.02844	1.32485	1.0501	1.21773	0.00574713	0.00660066	0.00591716	0.00671141	77.5	77.5	87.5	67.5
G6AE3	G6AE3	G6AE3	G6AE3	28	28	28	28	102	102	102	102	97.2356	98.8428	97.6374	99.6464	MALE	MALE	MALE	MALE	0.611359	0.785938	0.472546	0.707054	101.254	94.8248	81.9672	98.8428	1.04926	1.37427	0.871991	1.38242	0.00574713	0.00732601	0.00451467	0.00706714	77.5	67.5	127.5	70
G6AE3	G6AE3	G6AE3	G6AE3	28	28	28	28	102	102	102	102	97.2356	98.8428	97.6374	98.8428	MALE	MALE	MALE	MALE	0.620271	0.644328	0.628642	0.798353	104.468	102.861	100.048	89.1996	1.08257	1.30204	1.09342	1.2054	0.0058309	0.00600601	0.00600601	0.00746269	75	87.5	75	60
G6AE3	G6AE3	G6AE3	G6AE3	28	28	28	28	102	102	102	102	95.2266	95.6284	97.6374	98.8428	MALE	MALE	MALE	MALE	0.523575	0.684361	0.679668	0.69467	99.6464	88.396	104.066	96.8338	0.958138	1.11894	1.10709	1.15278	0.00558659	0.00719424	0.00649351	0.00649351	75	60	60	70
G6AE3	G6AE3	G6AE3	G6AE3	28	28	28	28	102	102	102	102	95.2266	95.6284	99.6464	98.8428	MALE	MALE	MALE	MALE	0.53862	0.607835	0.707064	0.633013	85.9852	92.8158	102.861	102.057	0.891038	1.07302	1.18914	1.08571	0.00574713	0.00638978	0.00649351	0.00591716	77.5	70	67.5	75
G6AE3	G6AE3	G6AE3	G6AE3	28	28	28	28	102	102	102	102	95.2266	95.6284	99.6464	95.6284	MALE	MALE	MALE	MALE	0.459411	0.554671	0.718731	0.51843	85.5834	95.6284	108.084	85.9852	0.843186	0.965943	1.14983	1.08842	0.00490196	0.0058309	0.00660066	0.00671141	102.5	72.5	57.5	70
G6AE3	G6AE3	G6AE3	G6AE3	28	28	28	28	102	102	102	102	95.2266	95.6284	99.6464	95.6284	MALE	MALE	MALE	MALE	0.516363	0.554671	0.730791	0.509875	92.7259	91.6104	108.486	88.396	0.913556	1.02933	1.18564	1.08461	0.00550964	0.0058309	0.00671141	0.00660066	80	82.5	57.5	70
G6AE3	G6AE3	G6AE3	G6AE3	28	28	28	28	102	102	102	102	97.6374	98.0392	98.8428	95.6284	MALE	MALE	MALE	MALE	0.474644	0.580235	0.763839	0.408709	88.396	94.423	96.0302	98.441	0.940383	1.0916	1.21557	0.994354	0.00461894	0.00638978	0.00694444	0.00529101	122.5	70	65	90
G6AE3	G6AE3	G6AE3	G6AE3	28	28	28	28	102	102	102	102	97.6374	98.0392	98.8428	95.6284	MALE	MALE	MALE	MALE	0.590577	0.521878	0.726025	0.457077	72.324	95.2266	103.664	76.7438	0.836116	1.13365	1.10281	0.887212	0.00574713	0.00574713	0.00660066	0.00591716	87.5	90	57.5	82.5
G6AE3	G6AE3	G6AE3	G6AE3	28	28	28	28	102	102	102	102	97.6374	98.0392	98.8428	98.0392	MALE	MALE	MALE	MALE	0.480189	0.521878	0.660617	0.584436	100.45	89.1996	104.066	86.7888	1.01465	1.0619	1.05117	1.06489	0.0046729	0.00574713	0.00600601	0.00649351	115	90	67.5	72.5
G6AE3	G6AE3	G6AE3	G6AE3	28	28	28	28	102	102	102	102	97.6374	96.432	95.6284	98.0392	MALE	MALE	MALE	MALE	0.678286	0.602002	0.625417	0.509933	102.057	97.2356	96.0302	96.432	1.14671	1.15757	1.14322	0.999295	0.00660066	0.00694444	0.00706714	0.00566572	62.5	60	57.5	80
G6AE3	G6AE3	G6AE3	G6AE3	28	28	28	28	102	102	102	102	99.6464	96.432	95.6284	98.0392	MALE	MALE	MALE	MALE	0.567175	0.512949	0.539612	0.566058	106.477	95.6284	94.8248	85.9852	1.16368	1.07448	1.00877	1.02363	0.00609756	0.00591716	0.00609756	0.00628931	72.5	80	70	75
G6AE3	G6AE3	G6AE3	G6AE3	28	28	28	28	102	102	102	102	99.6464	96.432	95.6284	98.0392	MALE	MALE	MALE	MALE	0.634926	0.484292	0.5086	0.495885	105.272	94.8248	96.432	83.1726	1.33255	1.03634	0.950069	0.961533	0.00682594	0.00558659	0.00574713	0.00550964	67.5	87.5	72.5	95
G6AE3	G6AE3	G6AE3	G6AE3	28	28	28	28	102	102	102	102	99.6464	96.432	95.6284	96.432	MALE	MALE	MALE	MALE	0.594356	0.471132	0.584135	0.589016	110.093	85.9852	80.7618	90.8068	1.2032	0.994049	1.05571	1.08103	0.00638978	0.00543478	0.00660066	0.00619195	65	97.5	75	77.5
G6AE3	G6AE3	G6AE3	G6AE3	28	28	28	28	102	102	102	102	99.6464	96.0302	98.0392	96.432	MALE	MALE	MALE	MALE	0.694154	0.600678	0.575742	0.589016	95.2266	90.0032	92.414	85.5834	1.28685	1.17651	1.13391	1.0501	0.00746269	0.00671141	0.00638978	0.00619195	60	72.5	75	80
G6AE3	G6AE3	G6AE3	G6AE3	28	28	28	28	102	102	102	102	98.8428	96.0302	98.0392	96.432	MALE	MALE	MALE	MALE	0.694862	0.610928	0.541163	0.531431	98.441	96.0302	95.6284	91.2086	1.28681	1.21557	0.990968	0.921299	0.00660066	0.00682594	0.00600601	0.00558659	75	67.5	70	80
G6AE3	G6AE3	G6AE3	G6AE3	28	28	28	28	102	102	102	102	98.8428	96.0302	98.0392	96.0302	MALE	MALE	MALE	MALE	0.731053	0.600678	0.533158	0.594356	99.6464	100.048	93.6194	93.6194	1.22266	1.26643	1.08231	1.22378	0.00694444	0.00671141	0.00591716	0.00638978	62.5	70	82.5	80
G6AE3	G6AE3	G6AE3	G6AE3	28	28	28	28	102	102	102	102	98.8428	96.0302	98.0392	96.0302	MALE	MALE	MALE	MALE	0.662086	0.643892	0.541163	0.634926	104.468	86.7888	85.1816	95.2266	1.14173	1.17282	0.957097	1.2054	0.00628931	0.00719424	0.00600601	0.00682594	67.5	65	77.5	67.5
G6AE3	G6AE3	G6AE3	G6AE3	28	28	28	28	102	102	102	102	98.8428	97.2356	96.432	96.0302	MALE	MALE	MALE	MALE	0.632262	0.559905	0.613309	0.694154	102.459	103.664	99.6464	86.387	1.06175	1.16477	1.11962	1.25199	0.00600601	0.00591716	0.00660066	0.00746269	70	80	62.5	65
G6AE3	G6AE3	G6AE3	G6AE3	28	28	28	28	102	102	102	102	95.6284	97.2356	96.432	97.2356	MALE	MALE	MALE	MALE	0.501185	0.568312	0.566563	0.555	90.405	104.468	94.0212	101.254	1.18176	1.1738	1.00023	1.04926	0.00706714	0.00600601	0.00609756	0.00558659	65	77.5	70	82.5
G6AE3	G6AE3	G6AE3	G6AE3	28	28	28	28	102	102	102	102	95.6284	97.2356	96.432	97.2356	MALE	MALE	MALE	MALE	0.468104	0.614441	0.526438	0.645098	97.6374	89.6014	96.0302	94.423	1.06708	1.21083	0.970002	1.12408	0.00660066	0.00649351	0.00566572	0.00649351	60	80	77.5	70
G6AE3	G6AE3	G6AE3	G6AE3	28	29	28	28	102	98	102	102	95.6284	97.2356	96.432	97.2356	MALE	MALE	MALE	MALE	0.425932	0.246	0.466916	0.624812	97.6374	83.5744	90.8068	91.2086	1.0387	0.702306	0.873142	1.11912	0.00600601	0.00340136	0.00502513	0.00628931	72.5	175	95	77.5
G6AE3	G6AE3	G6AE3	G6AE3	28	29	28	29	102	98	102	98	95.6284	97.2356	96.0302	97.2356	MALE	MALE	MALE	MALE	0.413514	0.28474	0.6027	0.0666066	94.423	77.5474	95.2266	73.9312	1.06093	0.68024	1.06996	0.584436	0.0058309	0.00393701	0.00619195	0.00358423	82.5	140	72.5	152.5
G6AE3	G6AE3	G6AE3	G6AE3	28	29	28	29	102	98	102	98	95.6284	97.2356	96.0302	97.2356	MALE	MALE	MALE	MALE	0.519544	0.273955	0.632052	0.0697308	57.4574	79.9582	102.057	80.7618	1.01695	0.608047	1.14671	0.638433	0.00732601	0.00378788	0.00649351	0.00375235	80	132.5	65	140
G6AE3	G6AE3	G6AE3	G6AE3	28	29	28	29	102	98	102	98	98.0392	97.2356	96.0302	97.2356	MALE	MALE	MALE	MALE	0.584086	0.20146	0.740198	0.0753884	98.441	68.306	87.5924	75.5384	1.13805	0.466253	1.22507	0.662618	0.00638978	0.00278552	0.00760456	0.0040568	70	212.5	60	132.5
G6AE3	G6AE3	G6AE3	G6AE3	28	29	28	29	102	98	102	98	98.0392	97.2356	96.0302	97.2356	MALE	MALE	MALE	MALE	0.540885	0.0694422	0.642482	0.061636	92.0122	69.5114	95.6284	72.324	1.09538	0.417486	1.10553	0.511124	0.00591716	0.000960154	0.00660066	0.00331675	85	875	65	160
G6AE3	G6AE3	G6AE3	G6AE3	28	29	28	29	102	98	102	98	98.0392	99.6464	97.2356	97.2356	MALE	MALE	MALE	MALE	0.557375	0.367052	0.509521	0.0423309	92.414	83.5744	99.6464	27.7242	1.06837	0.823393	0.914187	0.350939	0.00609756	0.00397614	0.00536193	0.0022779	77.5	150	77.5	360
G6AE3	G6AE3	G6AE3	G6AE3	28	29	28	29	102	98	102	98	98.0392	99.6464	97.2356	97.2356	MALE	MALE	MALE	MALE	0.496791	0.441692	0.597646	0.0340041	84.378	85.1816	103.664	35.3584	0.948067	1.01407	1.04712	0.408768	0.00543478	0.00478469	0.00628931	0.00182983	95	125	60	460
G6AE3	G6AE3	G6AE3	G6AE3	28	29	28	29	102	98	102	98	96.432	99.6464	97.2356	99.6464	MALE	MALE	MALE	MALE	0.574458	0.475843	0.61705	0.378015	94.423	83.5744	96.0302	82.369	1.03195	0.966178	1.07899	0.853565	0.00638978	0.00515464	0.00649351	0.00422833	65	107.5	65	140
G6AE3	G6AE3	G6AE3	G6AE3	28	29	28	29	102	98	102	98	96.432	99.6464	97.2356	99.6464	MALE	MALE	MALE	MALE	0.509364	0.482055	0.607193	0.466843	97.2356	92.8158	91.6104	80.36	0.957986	1.01438	1.05908	0.854894	0.00566572	0.00522193	0.00638978	0.00522193	75	100	70	97.5
G6AE3	G6AE3	G6AE3	G6AE3	28	29	29	29	102	98	98	98	96.432	98.0392	97.2356	99.6464	MALE	MALE	MALE	MALE	0.516682	0.253292	0.189111	0.460827	88.7978	73.9312	77.9492	85.1816	0.896947	0.608487	0.447984	0.882711	0.00574713	0.00375235	0.00244499	0.00515464	75	145	235	97.5
G6AE3	G6AE3	G6AE3	G6AE3	28	29	29	29	102	98	98	98	96.0302	98.0392	97.2356	98.0392	MALE	MALE	MALE	MALE	0.567321	0.258135	0.26997	0.265549	96.8338	76.7438	84.378	71.1186	1.11947	0.737921	0.607036	0.652464	0.00628931	0.00382409	0.0034904	0.00346021	72.5	157.5	147.5	180
G6AE3	G6AE3	G6AE3	G6AE3	28	29	29	29	102	98	98	98	96.0302	98.0392	97.2356	98.0392	MALE	MALE	MALE	MALE	0.615728	0.268399	0.313779	0.270225	98.8428	83.1726	77.5474	73.5294	1.1767	0.799737	0.625382	0.674582	0.00682594	0.00397614	0.0040568	0.00352113	62.5	147.5	122.5	175
G6AE3	G6AE3	G6AE3	G6AE3	28	29	29	29	102	98	98	98	96.0302	98.0392	97.2356	98.0392	MALE	MALE	MALE	MALE	0.673165	0.282437	0.301546	0.287969	90.405	81.5654	75.9402	79.1546	1.18176	0.715486	0.588684	0.709907	0.00746269	0.0041841	0.00389864	0.00375235	57.5	125	127.5	155
G6AE3	G6AE3	G6AE3	G6AE3	28	29	29	29	102	98	98	98	96.0302	98.0392	97.2356	98.0392	MALE	MALE	MALE	MALE	0.64895	0.194812	0.233323	0.350428	91.6104	58.6628	67.9042	80.7618	1.28126	0.564065	0.448213	0.758327	0.00719424	0.002886	0.00301659	0.00456621	67.5	242.5	180	112.5
G6AE3	G6AE3	G6AE3	G6AE3	28	29	29	29	102	98	98	98	97.2356	92.0122	97.2356	98.0392	MALE	MALE	MALE	MALE	0.571932	0.335665	0.0715178	0.256668	99.2446	81.1636	73.9312	74.333	1.14734	0.74462	0.326407	0.516201	0.00600601	0.00414079	0.000924642	0.00334448	80	132.5	855	155
G6AE3	G6AE3	G6AE3	G6AE3	28	29	29	29	102	98	98	98	97.2356	92.0122	99.6464	92.0122	MALE	MALE	MALE	MALE	0.571932	0.266655	0.36303	0.326791	102.861	77.5474	82.7708	82.369	1.12416	0.48017	0.795873	0.614694	0.00600601	0.00328947	0.00389864	0.00436681	75	142.5	152.5	95
G6AE3	G6AE3	G6AE3	G6AE3	28	29	29	29	102	98	98	98	97.2356	92.0122	99.6464	92.0122	MALE	MALE	MALE	MALE	0.628558	0.248279	0.450931	0.297556	91.6104	51.8322	82.369	80.36	1.12405	0.551406	0.925494	0.661399	0.00660066	0.00306279	0.00484262	0.00397614	70	232.5	117.5	130
G6AE3	G6AE3	G6AE3	G6AE3	29	29	29	29	98	98	98	98	97.2356	92.0122	99.6464	92.0122	MALE	MALE	MALE	MALE	0.0681017	0.290549	0.46212	0.229204	83.5744	77.5474	87.9942	48.6178	0.580378	0.665643	0.846098	0.517211	0.00282486	0.00358423	0.00496278	0.00306279	210	162.5	97.5	232.5
G6AE3	G6AE3	G6AE3	G6AE3	29	29	29	29	98	98	98	98	97.2356	96.8338	99.6464	92.0122	MALE	MALE	MALE	MALE	0.0949134	0.181552	0.479985	0.232769	80.36	69.1096	88.396	69.5114	0.675294	0.525548	0.892889	0.668379	0.00393701	0.00263852	0.00515464	0.00311042	135	247.5	95	217.5
G6AE3	G6AE3	G6AE3	G6AE3	29	29	29	29	98	98	98	98	97.2356	96.8338	98.0392	96.8338	MALE	MALE	MALE	MALE	0.0930811	0.180362	0.225793	0.159176	83.9762	74.333	76.7438	66.6988	0.663843	0.587613	0.542359	0.548961	0.003861	0.00262123	0.0034904	0.00240096	132.5	255	145	295
G6AE3	G6AE3	G6AE3	G6AE3	29	29	29	29	98	98	98	98	97.2356	96.8338	98.0392	96.8338	MALE	MALE	MALE	MALE	0.0813086	0.16927	0.236094	0.174926	73.1276	68.7078	83.9762	64.6898	0.48269	0.512745	0.61521	0.555277	0.00337268	0.00246002	0.00364964	0.00263852	145	272.5	137.5	262.5
G6AE3	G6AE3	G6AE3	G6AE3	29	29	29	29	98	98	98	98	97.2356	96.8338	98.0392	96.8338	MALE	MALE	MALE	MALE	0.0716434	0.170317	0.27353	0.177265	33.3494	72.7258	83.5744	69.5114	0.34559	0.50504	0.749546	0.538848	0.00297177	0.00247525	0.00422833	0.0026738	240	260	125	245
G6AE3	G6AE3	G6AE3	G6AE3	29	29	29	29	98	98	98	98	97.2356	96.8338	98.0392	96.8338	MALE	MALE	MALE	MALE	0.0371464	0.201488	0.279438	0.159176	15.2684	67.1006	77.1456	65.0916	0.2296	0.588602	0.648282	0.535733	0.00154083	0.00292826	0.00431965	0.00240096	582.5	227.5	112.5	295
G6AE3	G6AE3	G6AE3	G6AE3	29	29	29	29	98	98	98	98	99.6464	97.2356	98.0392	96.8338	MALE	MALE	MALE	MALE	0.415253	0.176389	0.193682	0.17378	82.7708	56.252	57.8592	62.6808	0.88054	0.44468	0.476207	0.56216	0.00446429	0.00217865	0.00299401	0.00262123	130	332.5	212.5	270
G6AE3	G6AE3	G6AE3	G6AE3	29	29	29	29	98	98	98	98	99.6464	97.2356	92.0122	96.8338	MALE	MALE	MALE	MALE	0.479468	0.222425	0.296404	0.184671	85.9852	68.306	85.1816	60.27	0.939729	0.562189	0.612817	0.467209	0.00515464	0.00274725	0.00378788	0.00278552	102.5	242.5	125	230
G6AE3	G6AE3	G6AE3	G6AE3	29	29	29	29	98	98	98	98	99.6464	97.2356	92.0122	97.2356	MALE	MALE	MALE	MALE	0.455964	0.228708	0.341705	0.22662	91.6104	60.6718	52.234	49.0196	0.925358	0.532209	0.458193	0.340414	0.00490196	0.00282486	0.00436681	0.00284495	105	240	115	207.5
G6AE3	G6AE3	G6AE3	G6AE3	29	29	29	29	98	98	98	98	98.0392	97.2356	92.0122	97.2356	MALE	MALE	MALE	MALE	0.23923	0.0962124	0.196117	0.168943	77.9492	36.9656	69.9132	73.1276	0.669092	0.535733	0.419899	0.535733	0.00328947	0.00118835	0.00250627	0.00212089	187.5	772.5	232.5	335
G6AE3	G6AE3	G6AE3	G6AE3	29	29	29	29	98	98	98	98	98.0392	97.2356	92.0122	97.2356	MALE	MALE	MALE	MALE	0.249488	0.213622	0.308073	0.223441	80.36	74.7348	73.9312	63.8862	0.661399	0.655568	0.57311	0.408219	0.00343053	0.00263852	0.00393701	0.00280505	170	265	125	200
G6AE3	G6AE3	G6AE3	G6AE3	29	29	29	29	98	98	98	98	98.0392	97.2356	96.8338	97.2356	MALE	MALE	MALE	MALE	0.280795	0.266325	0.180887	0.19476	83.1726	76.342	69.1096	28.126	0.729584	0.641529	0.441595	0.345104	0.003861	0.00328947	0.00255428	0.00244499	145	185	235	327.5
G6AE3	G6AE3	G6AE3	G6AE3	29	29	29	29	98	98	98	98	98.0392	96.0302	96.8338	97.2356	MALE	MALE	MALE	MALE	0.33984	0.261203	0.185628	0.0952264	81.9672	68.7078	69.9132	78.351	0.849401	0.589767	0.44673	0.393724	0.0046729	0.00331675	0.00262123	0.00119546	117.5	185	225	637.5
G6AE3	G6AE3	G6AE3	G6AE3	29	29	29	29	98	98	98	98	98.0392	96.0302	96.8338	97.2356	MALE	MALE	MALE	MALE	0.267867	0.246874	0.165075	0.264202	61.8772	78.351	67.5024	75.9402	0.531135	0.544104	0.335	0.588684	0.00368324	0.0031348	0.002331	0.00331675	155	175	227.5	172.5
G6AE3	G6AE3	G6AE3	G6AE3	29	29	29	29	98	98	98	98	92.0122	96.0302	96.8338	96.0302	MALE	MALE	MALE	MALE	0.295159	0.270164	0.185628	0.252365	85.5834	72.324	67.9042	68.306	0.594329	0.679099	0.395943	0.641371	0.00397614	0.00343053	0.00262123	0.00308642	107.5	185	210	217.5
G6AE3	G6AE3	G6AE3	G6AE3	29	29	29	29	98	98	98	98	92.0122	96.0302	96.8338	96.0302	MALE	MALE	MALE	MALE	0.307381	0.313132	0.197263	0.280502	79.1546	76.7438	77.9492	66.297	0.601936	0.688285	0.523149	0.669667	0.00414079	0.00397614	0.00278552	0.00343053	110	140	210	192.5
G6AE3	G6AE3	G6AE3	G6AE3	29	29	29	29	98	98	98	98	92.0122	100.852	97.2356	96.0302	MALE	MALE	MALE	MALE	0.220602	0.300307	0.200387	0.24853	56.252	81.1636	68.306	70.315	0.390639	0.819834	0.422947	0.676106	0.00297177	0.00346021	0.00255428	0.00303951	192.5	190	230	225
G6AE3	G6AE3	G6AE3	G6AE3	29	29	29	29	98	98	98	98	92.0122	100.852	97.2356	96.0302	MALE	MALE	MALE	MALE	0.234542	0.366972	0.183942	0.306815	78.7528	79.1546	58.261	74.333	0.566567	0.889378	0.296494	0.697962	0.00315956	0.00422833	0.00234467	0.00375235	177.5	147.5	230	160
G6AE3	G6AE3	G6AE3	G6AE3	29	29	29	29	98	98	98	98	96.8338	100.852	97.2356	96.0302	MALE	MALE	MALE	MALE	0.162927	0.359374	0.209763	0.321915	71.5204	84.378	69.9132	76.342	0.442851	0.922164	0.485508	0.771131	0.00255428	0.00414079	0.0026738	0.00393701	230	150	230	155
G6AE3	G6AE3	G6AE3	G6AE3	29	29	29	29	98	98	98	98	96.8338	100.852	97.2356	100.852	MALE	MALE	MALE	MALE	0.1683	0.366972	0.228057	0.262829	73.5294	84.7798	59.4664	68.306	0.45529	0.901913	0.47009	0.707834	0.00263852	0.00422833	0.00290698	0.00294985	217.5	142.5	217.5	242.5
G6AE3	G6AE3	G6AE3	G6AE3	29	29	29	29	98	98	98	98	96.8338	96.8338	97.2356	100.852	MALE	MALE	MALE	MALE	0.169418	0.185886	0.175703	0.354271	71.9222	67.1006	12.4558	77.5474	0.467027	0.458025	0.2542	0.695492	0.00265604	0.00237248	0.00223964	0.00397614	222.5	275	397.5	140
G6AE3	G6AE3	G6AE3	G6AE3	29	29	29	29	98	98	98	98	96.8338	96.8338	97.2356	100.852	MALE	MALE	MALE	MALE	0.146972	0.193938	0.204301	0.376741	74.7348	71.9222	30.9386	79.5564	0.448858	0.49946	0.297487	0.697863	0.00230415	0.00247525	0.00260417	0.00422833	267.5	260	280	122.5
G6AE3	G6AE3	G6AE3	G6AE3	29	29	29	29	98	98	98	98	96.8338	96.8338	97.2356	100.852	MALE	MALE	MALE	MALE	0.169418	0.232841	0.186124	0.361457	65.4934	73.9312	77.5474	85.1816	0.462851	0.648519	0.520452	0.715812	0.00265604	0.00297177	0.00237248	0.0040568	235	222.5	272.5	127.5
G6AE3	G6AE3	G6AE3	G6AE3	29	29	29	29	98	98	98	98	96.8338	96.8338	97.2356	96.8338	MALE	MALE	MALE	MALE	0.189556	0.349781	0.264592	0.161926	61.4754	77.1456	72.7258	58.6534	0.434455	0.691889	0.50504	0.454678	0.00297177	0.00446429	0.00337268	0.00214362	195	112.5	152.5	337.5
G6AE3	G6AE3	G6AE3	G6AE3	29	29	29	29	98	98	98	98	97.2356	96.8338	96.0302	96.8338	MALE	MALE	MALE	MALE	0.238104	0.257734	0.270379	0.18246	56.6538	74.7348	72.324	67.1006	0.407581	0.701735	0.462134	0.374864	0.00308642	0.00328947	0.00326264	0.00241546	185	197.5	150	235
G6AE3	G6AE3	G6AE3	G6AE3	29	29	29	29	98	98	98	98	97.2356	95.6284	96.0302	96.8338	MALE	MALE	MALE	MALE	0.155379	0.277971	0.279498	0.207523	70.315	75.1366	70.7168	65.0916	0.382147	0.618408	0.466778	0.583781	0.0020141	0.00321027	0.00337268	0.00274725	312.5	190	145	252.5
G6AE3	G6AE3	G6AE3	G6AE3	29	29	29	29	98	98	98	98	97.2356	95.6284	96.0302	96.8338	MALE	MALE	MALE	MALE	0.238104	0.292033	0.263921	0.288866	63.4844	73.5294	79.9582	71.9222	0.405651	0.659457	0.527777	0.882481	0.00308642	0.00337268	0.00318471	0.00382409	167.5	185	162.5	180
G6AE3	G6AE3	G6AE3	G6AE3	29	29	29	29	98	98	98	98	97.2356	95.6284	96.0302	96.8338	MALE	MALE	MALE	MALE	0.269269	0.28022	0.30245	0.270747	31.3404	77.9492	80.36	68.7078	0.409678	0.523149	0.505409	0.532619	0.0034904	0.00323625	0.00364964	0.00358423	210	160	115	150
G6AE3	G6AE3	G6AE3	G6AE3	29	29	29	29	98	98	98	98	97.2356	95.6284	100.852	95.6284	MALE	MALE	MALE	MALE	0.0782013	0.190722	0.285975	0.111757	69.1096	57.8592	79.1546	75.5384	0.375596	0.439994	0.726189	0.53384	0.00101368	0.00220264	0.00340136	0.00326264	802.5	322.5	185	165
G6AE3	G6AE3	G6AE3	G6AE3	29	29	29	29	98	98	98	98	97.2356	95.6284	100.852	95.6284	MALE	MALE	MALE	MALE	0.26465	0.059757	0.337657	0.109087	78.351	78.7528	82.7708	73.1276	0.544104	0.556557	0.759365	0.556103	0.00343053	0.000690131	0.00401606	0.00318471	147.5	1307.5	140	182.5
G6AE3	G6AE3	G6AE3	G6AE3	29	29	29	29	98	98	98	98	96.0302	91.6104	100.852	95.6284	MALE	MALE	MALE	MALE	0.258566	0.0360646	0.348143	0.121682	71.5204	67.9042	83.5744	79.5564	0.613909	0.516382	0.766738	0.572348	0.00308642	0.00220264	0.00414079	0.0035524	207.5	322.5	132.5	142.5
G6AE3	G6AE3	G6AE3	G6AE3	29	29	29	29	98	98	98	98	96.0302	91.6104	100.852	95.6284	MALE	MALE	MALE	MALE	0.264693	0.0552221	0.367147	0.101043	80.36	72.7258	80.36	42.5908	0.611103	0.624256	0.811717	0.373604	0.00315956	0.00337268	0.00436681	0.00294985	185	180	130	225
G6AE3	G6AE3	G6AE3	G6AE3	29	29	29	29	98	98	98	98	96.0302	91.6104	96.8338	95.6284	MALE	MALE	MALE	MALE	0.264693	0.0475969	0.216961	0.0715103	71.1186	70.315	54.243	32.144	0.585338	0.590882	0.428798	0.333098	0.00315956	0.00290698	0.00280505	0.00208768	195	225	230	382.5
G6AE3	G6AE3	G6AE3	G6AE3	29	29	29	29	98	98	98	98	96.0302	91.6104	96.8338	95.6284	MALE	MALE	MALE	MALE	0.311432	0.0525629	0.163178	0.0303396	80.7618	71.5204	68.7078	49.4214	0.693234	0.613909	0.383842	0.433521	0.00371747	0.00321027	0.0021097	0.00088574	152.5	195	295	1015
G6AE3	G6AE3	G6AE3	G6AE3	29	29	29	29	98	98	98	98	96.0302	91.6104	96.8338	91.6104	MALE	MALE	MALE	MALE	0.317331	0.0547604	0.235096	0.145346	83.5744	39.3764	73.9312	50.9689	0.717377	0.442431	0.472404	0.478581	0.00378788	0.00334448	0.00303951	0.00214362	147.5	210	172.5	360
G6AE3	G6AE3	G6AE3	G6AE3	29	29	29	29	98	98	98	98	100.852	91.6104	96.8338	91.6104	MALE	MALE	MALE	MALE	0.317039	0.0254245	0.341486	0.190193	81.5654	24.108	77.9492	68.7078	0.731528	0.376688	0.59277	0.565496	0.0040568	0.0015528	0.00441501	0.00280505	135	580	95	235
G6AE3	G6AE3	G6AE3	G6AE3	29	29	29	29	98	98	98	98	100.852	98.441	96.8338	91.6104	MALE	MALE	MALE	MALE	0.313856	0.325683	0.260865	0.21423	85.9852	73.5294	75.5384	69.1096	0.693429	0.782228	0.553395	0.427923	0.00401606	0.00414079	0.00337268	0.00315956	125	147.5	160	155
G6AE3	G6AE3	G6AE3	G6AE3	29	29	29	29	98	98	98	98	100.852	98.441	95.6284	91.6104	MALE	MALE	MALE	MALE	0.323603	0.300774	0.181529	0.20609	85.1816	75.9402	74.7348	61.8772	0.701083	0.807874	0.53766	0.509277	0.00414079	0.00382409	0.00311042	0.00303951	120	167.5	182.5	207.5
G6AE3	G6AE3	G6AE3	G6AE3	29	29	29	29	98	98	98	98	100.852	98.441	95.6284	91.6104	MALE	MALE	MALE	MALE	0.36097	0.325683	0.188872	0.203005	74.7348	75.9402	82.7708	65.8952	0.736303	0.853261	0.584953	0.4018	0.00461894	0.00414079	0.00323625	0.00299401	115	152.5	167.5	170
G6AE3	G6AE3	G6AE3	G6AE3	29	29	29	29	98	98	98	98	96.8338	98.441	95.6284	91.6104	MALE	MALE	MALE	MALE	0.137076	0.359143	0.207323	0.0733807	75.9402	77.9492	71.9222	59.8682	0.407186	0.807764	0.508284	0.575656	0.00180505	0.00456621	0.0035524	0.00108225	367.5	122.5	140	820
G6AE3	G6AE3	G6AE3	G6AE3	29	29	29	29	98	98	98	98	96.8338	99.2446	95.6284	98.441	MALE	MALE	MALE	MALE	0.186815	0.189327	0.132189	0.289881	69.5114	75.7106	57.0556	71.9222	0.518742	0.565004	0.332686	0.630896	0.00246002	0.00230415	0.00226501	0.00393701	272.5	300	270	140
G6AE3	G6AE3	G6AE3	G6AE3	29	29	29	29	98	98	98	98	96.8338	99.2446	95.6284	98.441	MALE	MALE	MALE	MALE	0.207204	0.25758	0.147192	0.298701	72.324	74.333	24.5098	75.9402	0.560651	0.507392	0.453885	0.681078	0.00272851	0.0031348	0.00252207	0.0040568	237.5	172.5	342.5	135
G6AE3	G6AE3	G6AE3	G6AE3	29	29	29	29	98	98	98	98	96.8338	99.2446	95.6284	98.441	MALE	MALE	MALE	MALE	0.267395	0.263782	0.0540885	0.321528	79.9582	75.5384	58.6628	77.1456	0.768829	0.597142	0.526124	0.760055	0.00352113	0.00321027	0.000926784	0.00436681	180	185	967.5	127.5
G6AE3	G6AE3	G6AE3	G6AE3	29	29	29	29	98	98	98	98	96.8338	99.2446	91.6104	98.441	MALE	MALE	MALE	MALE	0.282306	0.329992	0.0709059	0.336209	76.7438	79.9582		65.8952	0.552114	0.671918		0.701013	0.00371747	0.00401606	0.0040568	0.00456621	130	130	185	125
G6AE3	G6AE3	G6AE3	G6AE3	29	29	29	29	98	98	98	98	95.6284	99.2446	91.6104	99.2446	MALE	MALE	MALE	MALE	0.220313	0.336755	0.0449314	0.274011	75.5384	81.1636	55.4484	67.1006	0.490509	0.696683	0.398909	0.53044	0.00292826	0.00409836	0.00257069	0.00311042	187.5	127.5	250	195
G6AE3	G6AE3	G6AE3	G6AE3	29	29	29	29	98	99	98	98	95.6284	95.6284	91.6104	99.2446	MALE	MALE	MALE	MALE	0.243486	0.420907	0.0361122	0.271897	77.1456	77.9492	72.324	69.5114	0.500945	0.901147	0.434378	0.584129	0.00323625	0.00543478	0.00206612	0.00308642	155	97.5	317.5	205
G6AE3	G6AE3	G6AE3	G6AE3	29	29	29	29	98	99	98	98	95.6284	95.6284	91.6104	99.2446	MALE	MALE	MALE	MALE	0.277116	0.353639	0.0561101	0.318606	82.369	84.378	77.1456	73.5294	0.592583	0.874383	0.517756	0.707013	0.00368324	0.00456621	0.00321027	0.00361664	132.5	122.5	162.5	172.5
G6AE3	G6AE3	G6AE3	G6AE3	29	29	29	29	98	99	98	98	95.6284	95.6284	91.6104	99.2446	MALE	MALE	MALE	MALE	0.188564	0.33097	0.0535323	0.343449	66.6988	83.5744	63.0826	83.5744	0.308078	0.823393	0.416387	0.673987	0.00250627	0.0042735	0.00306279	0.00389864	182.5	132.5	175	132.5
G6AE3	G6AE3	G6AE3	G6AE3	29	29	29	29	98	99	98	99	95.6284	95.6284	91.6104	95.6284	MALE	MALE	MALE	MALE	0.190957	0.314186	0.0543649	0.448377	35.7602	79.5564	74.333	79.5564	0.300506	0.764965	0.498879	0.869469	0.00253807	0.0040568	0.00311042	0.00558659	275	142.5	172.5	87.5
G6AE3	G6AE3	G6AE3	G6AE3	29	29	29	29	98	99	98	99	95.6284	96.0302	91.6104	95.6284	MALE	MALE	MALE	MALE	0.0673865	0.373304	0.0637894	0.388666	35.7602	86.387	24.9116	77.9492	0.581467	0.851103	0.348414	0.731917	0.000895656	0.00472813	0.00364964	0.00484262	1055	110	202.5	100
G6AE3	G6AE3	G6AE3	G6AE3	29	29	29	29	98	99	98	99	95.6284	96.0302	91.6104	95.6284	MALE	MALE	MALE	MALE	0.234019	0.323581	0.0267252	0.358302	74.7348	82.7708	34.9566	80.7618	0.493299	0.857728	0.26087	0.740934	0.00311042	0.00409836	0.00152905	0.00446429	170	147.5	520	115
G6AE3	G6AE3	G6AE3	G6AE3	29	29	29	29	98	99	98	99	91.6104	96.0302	98.441	95.6284	MALE	MALE	MALE	MALE	0.134338	0.323581	0.317741	0.339364	66.297	96.0302	73.5294	72.7258	0.28638	0.806976	0.690417	0.699287	0.0020141	0.00409836	0.0041841	0.00422833	265	125	132.5	132.5
G6AE3	G6AE3	G6AE3	G6AE3	29	29	29	29	98	99	98	99	91.6104	96.0302	98.441	96.0302	MALE	MALE	MALE	MALE	0.192493	0.301926	0.287652	0.396755	76.7438	75.9402	77.5474	90.405	0.523848	0.696699	0.695492	0.829404	0.002886	0.00382409	0.00378788	0.00456621	200	152.5	152.5	110
G6AE3	G6AE3	G6AE3	G6AE3	29	29	29	29	98	99	98	99	91.6104	85.5834	98.441	96.0302	MALE	MALE	MALE	MALE	0.217614	0.140142	0.308074	0.367396	73.9312	33.3494	77.9492	76.342	0.464976	0.466425	0.699096	0.791109	0.00326264	0.00441501	0.0040568	0.00422833	147.5	155	135	140
G6AE3	G6AE3	G6AE3	G6AE3	29	29	29	29	98	99	98	99	91.6104	85.5834	98.441	96.0302	MALE	MALE	MALE	MALE	0.188415	0.075757	0.367749	0.371322	70.315	31.3404	70.7168	86.7888	0.456591	0.333409	0.752306	0.796228	0.00282486	0.00238663	0.00484262	0.0042735	200	325	112.5	125
G6AE3	G6AE3	G6AE3	G6AE3	29	29	29	29	98	99	98	99	91.6104	85.5834	99.2446	96.0302	MALE	MALE	MALE	MALE	0.215854	0.0872038	0.31956	0.33548	67.5024	70.7168		76.342	0.4116	0.466778		0.669667	0.00323625	0.00274725	0.00389864	0.003861	145	212.5	205	145
G6AE3	G6AE3	G6AE3	G6AE3	29	29	29	29	98	99	98	99	91.6104	85.5834	99.2446	85.5834	MALE	MALE	MALE	MALE	0.0716037	0.0695338	0.226742	0.101342	70.7168	30.9386	71.5204	74.7348	0.508754	0.338127	0.523959	0.528161	0.00107354	0.00219058	0.00276625	0.0035524	792.5	365	225	140
G6AE3	G6AE3	G6AE3	G6AE3	29	29	29	29	98	99	98	99	98.441	85.5834	99.2446	85.5834	MALE	MALE	MALE	MALE	0.305228	0.0512798	0.251048	0.0426425	78.7528	51.8322	72.324	66.297	0.661788	0.281697	0.447827	0.594592	0.003861	0.00161551	0.00306279	0.00149477	140	435	165	557.5
G6AE3	G6AE3	G6AE3	G6AE3	29	29	29	29	98	99	98	99	98.441	85.5834	99.2446	85.5834	MALE	MALE	MALE	MALE	0.311237	0.0236617	0.26743	0.0724056	78.351	52.6358	81.1636	49.4214	0.7027	0.482897	0.502561	0.349268	0.00393701	0.000745434	0.00326264	0.00253807	142.5	1232.5	145	252.5
G6AE3	G6AE3	G6AE3	G6AE3	29	29	29	29	98	99	98	99	98.441	85.5834	99.2446	85.5834	MALE	MALE	MALE	MALE	0.35292	0.0684099	0.31345	0.048849	77.5474	43.7962	83.1726	42.5908	0.824972	0.309514	0.598364	0.441355	0.00446429	0.00215517	0.00382409	0.00171233	130	322.5	122.5	487.5
G6AE3	G6AE3	G6AE3	G6AE3	29	29	29	29	98	99	98	99	98.441	85.5834	99.2446	85.5834	MALE	MALE	MALE	MALE	0.334267	0.0459034	0.339409	0.021226	75.9402	34.5548	76.7438	41.3854	0.713054	0.377648	0.562226	0.256256	0.00422833	0.00144613	0.00414079	0.000744048	130	600	105	1182.5
G6AE3	G6AE3	G6AE3	G6AE3	29	29	29	29	98	99	99	99	99.2446	95.6284	95.6284	85.5834	MALE	MALE	MALE	MALE	0.0902546	0.322302	0.433429	0.0555016	67.9042	82.7708	84.7798	65.8952	0.41405	0.759365	0.980113	0.389912	0.00110926	0.00389864	0.0058309	0.00194553	737.5	147.5	85	345
G6AE3	G6AE3	G6AE3	G6AE3	29	29	29	29	98	99	99	99	99.2446	95.6284	95.6284	85.5834	MALE	MALE	MALE	MALE	0.238256	0.353292	0.388162	0.0411063	79.9582	81.5654	83.9762	25.7152	0.519209	0.784283	0.848244	0.359653	0.00292826	0.0042735	0.00522193	0.00144092	187.5	130	92.5	622.5
G6AE3	G6AE3	G6AE3	G6AE3	29	29	29	29	98	99	99	99	99.2446	95.6284	95.6284	95.6284	MALE	MALE	MALE	MALE	0.263316	0.307325	0.324598	0.330894	74.333	81.1636	84.378	83.1726	0.59946	0.7621	0.792282	0.745943	0.00323625	0.00371747	0.00436681	0.0040568	185	162.5	122.5	135
G6AE3	G6AE3	G6AE3	G6AE3	29	29	29	29	98	99	99	99	99.2446	95.6284	95.6284	95.6284	MALE	MALE	MALE	MALE	0.283995	0.313145	0.343339	0.321124	82.7708	76.342	75.9402	80.7618	0.695553	0.734058	0.748179	0.678671	0.0034904	0.00378788	0.00461894	0.00393701	167.5	160	115	135
G6AE3	G6AE3	G6AE3	G6AE3	29	29	29	29	98	99	99	99	99.2446	95.6284	95.6284	95.6284	MALE	MALE	MALE	MALE	0.340437	0.381849	0.314304	0.303217	79.1546	81.1636	61.0736	74.7348	0.694339	0.7621	0.706053	0.6027	0.0041841	0.00461894	0.00422833	0.00371747	125	110	150	145
G6AE3	G6AE3	G6AE3	G6AE3	29	29	29	29	98	99	99	99	99.2446	97.2356	96.0302	95.6284	MALE	MALE	MALE	MALE	0.314149	0.370125	0.356059	0.34857	79.1546	86.7888	93.2176	73.1276	0.625728	0.876655	0.767223	0.799209	0.003861	0.00431965	0.00446429	0.0042735	132.5	132.5	102.5	142.5
G6AE3	G6AE3	G6AE3	G6AE3	29	29	29	29	99	99	99	99	95.6284	97.2356	96.0302	97.2356	MALE	MALE	MALE	MALE	0.462994	0.378295	0.377103	0.377331	83.5744	89.6014	81.5654	83.1726	0.939038	0.882772	0.700132	0.799737	0.00574713	0.00441501	0.00472813	0.0042735	85	125	95	130
G6AE3	G6AE3	G6AE3	G6AE3	29	29	29	29	99	99	99	99	95.6284	97.2356	96.0302	97.2356	MALE	MALE	MALE	MALE	0.363706	0.354799	0.317126	0.38557	87.5924	83.5744	87.5924	83.5744	0.751866	0.766738	0.70639	0.823393	0.00451467	0.00414079	0.00397614	0.00436681	105	132.5	127.5	127.5
G6AE3	G6AE3	G6AE3	G6AE3	29	29	29	29	99	99	99	99	95.6284	97.2356	96.0302	97.2356	MALE	MALE	MALE	MALE	0.363706	0.327663	0.348285	0.38557	86.7888	83.1726	85.5834	85.5834	0.778375	0.729584	0.719188	0.785169	0.00451467	0.00382409	0.00436681	0.00436681	110	147.5	110	120
G6AE3	G6AE3	G6AE3	G6AE3	29	29	29	29	99	99	99	99	95.6284	95.6284	96.0302	97.2356	MALE	MALE	MALE	MALE	0.340638	0.229237	0.293765	0.340909	75.1366	83.5744	70.315	78.351	0.689327	0.687855	0.545078	0.7027	0.00422833	0.00361664	0.00368324	0.003861	127.5	155	142.5	147.5
G6AE3	G6AE3	G6AE3	G6AE3	29	29	29	29	99	99	99	99	96.0302	95.6284	85.5834	97.2356	MALE	MALE	MALE	MALE	0.350098	0.242386	0.148248	0.340909	89.6014	85.5834	81.5654	84.7798	0.928512	0.750732	0.529645	0.712435	0.00490196	0.00382409	0.00371747	0.003861	107.5	147.5	115	140
G6AE3	G6AE3	G6AE3	G6AE3	29	29	29	29	99	99	99	99	96.0302	95.6284	85.5834	95.6284	MALE	MALE	MALE	MALE	0.292705	0.231328	0.165129	0.168648	82.7708	85.9852	24.9116	78.7528	0.742339	0.679725	0.279906	0.648171	0.00409836	0.00364964	0.00414079	0.00334448	132.5	147.5	152.5	177.5
G6AE3	G6AE3	G6AE3	G6AE3	29	29	29	29	99	99	99	99	96.0302	95.6284	85.5834	95.6284	MALE	MALE	MALE	MALE	0.292705	0.179051	0.104531	0.182372	92.0122	53.4394	39.7782	78.7528	0.773212	0.458707	0.286174	0.635103	0.00409836	0.00282486	0.00262123	0.00361664	125	237.5	242.5	152.5
G6AE3	G6AE3	G6AE3	G6AE3	29	29	29	29	99	99	99	99	96.0302	93.2176	85.5834	95.6284	MALE	MALE	MALE	MALE	0.305213	0.0952449	0.12214	0.189215	74.7348	66.6988	60.6718	84.7798	0.701735	0.507215	0.407193	0.644713	0.0042735	0.00154679	0.00306279	0.00375235	127.5	515	177.5	135
G6AE3	G6AE3	G6AE3	G6AE3	29	29	29	29	99	99	99	99	96.0302	93.2176	85.5834	95.6284	MALE	MALE	MALE	MALE	0.27053	0.0975073	0.0682854	0.168648	68.306	32.144	40.18	72.324	0.672966	0.309077	0.163002	0.493679	0.00378788	0.00158353	0.00171233	0.00334448	162.5	527.5	337.5	152.5
G6AE3	G6AE3	G6AE3	G6AE3	29	29	29	29	99	99	99	99	85.5834	93.2176	85.5834	95.6284	MALE	MALE	MALE	MALE	0.111569	0.213065	0.0850291	0.0494857	75.1366	28.5278	50.225	36.5638	0.540551	0.182286	0.258892	0.369331	0.00375235	0.00346021	0.0021322	0.000981354	127.5	132.5	275	920
G6AE3	G6AE3	G6AE3	G6AE3	29	29	29	29	99	99	99	99	85.5834	93.2176	85.5834	93.2176	MALE	MALE	MALE	MALE	0.0444442	0.0975073	0.0283531	0.0738271	74.333	52.6358	65.0916	41.7872	0.498879	0.408029	0.290587	0.358688	0.00149477	0.00158353	0.000710985	0.00132188	520	502.5	1182.5	640
G6AE3	G6AE3	G6AE3	G6AE3	29	29	29	29	99	99	99	99	85.5834	93.2176	85.5834	93.2176	MALE	MALE	MALE	MALE	0.0779376	0.156284	0.101215	0.156663	42.5908	71.9222	22.9026	25.3134	0.300995	0.591952	0.225641	0.330894	0.00262123	0.00253807	0.00253807	0.00280505	240	272.5	292.5	280
G6AE3	G6AE3	G6AE3	G6AE3	29	29	29	29	99	99	99	99	85.5834	93.2176	85.5834	93.2176	MALE	MALE	MALE	MALE	0.0494318	0.159317	0.0494466	0.189967	53.0376	33.7512	51.8322	29.7332	0.304814	0.324531	0.251003	0.308116	0.00166251	0.00258732	0.00123993	0.00340136	427.5	282.5	600	197.5
G6AE3	G6AE3	G6AE3	G6AE3	29	29	29	29	99	99	99	99	85.5834	93.2176	95.6284	93.2176	MALE	MALE	MALE	MALE	0.0529532	0.0383889	0.323457	0.0681932	12.4558	23.7062	83.9762	59.8682	0.174207	0.370409	0.705682	0.36505	0.00178094	0.000623441	0.003861	0.001221	490	1540	140	655
G6AE3	G6AE3	G6AE3	G6AE3	29	29	29	29	99	99	99	99	85.5834	93.2176	95.6284	93.2176	MALE	MALE	MALE	MALE	0.0409266	0.101947	0.346896	0.111924	20.8936	59.8682	84.378	60.6718	0.131406	0.325371	0.680468	0.452775	0.00137646	0.00165563	0.00414079	0.00200401	567.5	420	117.5	365
G6AE3	G6AE3	G6AE3	G6AE3	29	29	29	29	99	99	99	99	85.5834	98.8428	95.6284	93.2176	MALE	MALE	MALE	MALE	0.0598856	0.407207	0.343341	0.157769	62.6808	87.5924	74.333	67.1006	0.4592	0.862979	0.71474	0.337189	0.0020141	0.00414079	0.00409836	0.00282486	360	140	140	155
G6AE3	G6AE3	G6AE3	G6AE3	29	29	29	29	99	99	99	99	85.5834	98.8428	95.6284	93.2176	MALE	MALE	MALE	MALE	0.0454636	0.454229	0.294983	0.0263569	16.072	91.2086	79.1546	59.8682	0.328	0.970304	0.625728	0.293472	0.00152905	0.00461894	0.00352113	0.000471921	605	122.5	157.5	1915
G6AE3	G6AE3	G6AE3	G6AE3	29	29	29	29	99	99	99	99	95.6284	98.8428	95.6284	93.2176	MALE	MALE	MALE	MALE	0.296533	0.470529	0.378218	0.0837962	80.36	95.2266	83.1726	50.225	0.611103	1.01305	0.698929	0.210146	0.0035524	0.00478469	0.00451467	0.00150038	150	115	102.5	427.5
G6AE3	G6AE3	G6AE3	G6AE3	29	29	29	29	99	99	99	99	95.6284	96.432	97.2356	98.8428	MALE	MALE	MALE	MALE	0.352955	0.362389	0.370992	0.382629	85.1816	86.387	85.9852	85.5834	0.701083	0.851103	0.771168	0.767564	0.00422833	0.00478469	0.00431965	0.00397614	115	107.5	120	140
G6AE3	G6AE3	G6AE3	G6AE3	29	29	29	29	99	99	99	99	95.6284	96.432	97.2356	98.8428	MALE	MALE	MALE	MALE	0.338637	0.338122	0.383414	0.411244	77.9492	82.369	87.9942	84.378	0.641557	0.70703	0.789186	0.852303	0.0040568	0.00446429	0.00446429	0.0042735	125	107.5	112.5	135
G6AE3	G6AE3	G6AE3	G6AE3	29	29	29	29	99	99	99	99	95.6284	96.432	97.2356	98.8428	MALE	MALE	MALE	MALE	0.310312	0.330739	0.35935	0.439411	79.9582	86.387	80.36	90.8068	0.555265	0.811146	0.661399	0.873142	0.00371747	0.00436681	0.0041841	0.00456621	125	122.5	117.5	115
G6AE3	G6AE3	G6AE3	G6AE3	29	29	29	29	99	99	99	99	95.6284	96.432	97.2356	98.8428	MALE	MALE	MALE	MALE	0.335237	0.320251	0.322269	0.483573	84.7798	72.324	86.387	91.6104	0.743682	0.712552	0.682901	0.925358	0.00401606	0.00422833	0.00375235	0.00502513	135	135	140	100
G6AE3		G6AE3	G6AE3	29		29	29	99		99	99	97.2356		95.6284	96.432	MALE		MALE	MALE	0.363133		0.118007	0.367466	86.387		87.1906	88.396	0.757781		0.548369	0.870897	0.0041841		0.00286533	0.00461894	125		190	115
G6AE3		G6AE3	G6AE3	29		29	29	99		99	99	97.2356		95.6284	96.432	MALE		MALE	MALE	0.363133		0.150308	0.389982	92.414		83.5744	82.369	0.760609		0.601255	0.83201	0.0041841		0.00364964	0.00490196	117.5		135	105
G6AE3		G6AE3	G6AE3	29		29	29	99		99	99	97.2356		95.6284	96.432	MALE		MALE	MALE	0.400872		0.150308	0.322744	85.9852		86.7888	85.9852	0.807373		0.592415	0.771168	0.00461894		0.00364964	0.0040568	110		127.5	135
G6AE3		G6AE3	G6AE3	29		29	29	99		99	99	97.2356		95.6284	96.432	MALE		MALE	MALE	0.331888		0.154538	0.371759	78.7528		82.7708	69.1096	0.661788		0.528887	0.716162	0.00382409		0.00375235	0.0046729	142.5		110	117.5
G6AE3		G6AE3	G6AE3	29		29	29	99		99	99	97.2356		95.6284	96.432	MALE		MALE	MALE	0.341688		0.140083	0.319504	83.5744		36.162	75.9402	0.687855		0.324323	0.696699	0.00393701		0.00340136	0.00401606	132.5		182.5	140
G6AE3		G6AE3		29		29		99		99		95.6284		95.6284		MALE		MALE		0.0606491		0.0380809		85.9852		30.9386		0.65388		0.290503		0.00343053		0.000924642		160		975
G6AE3		G6AE3		29		29		99		99		95.6284		93.2176		MALE		MALE		0.0639392		0.0781728		84.7798		45.0016		0.644713		0.170461		0.00361664		0.00134409		145		480
G6AE3		G6AE3		29		29		99		99		95.6284		93.2176		MALE		MALE		0.0717209		0.100018		84.378		65.4934		0.724275		0.4323		0.0040568		0.00171969		130		430
G6AE3		G6AE3		29		29		99		99		95.6284		93.2176		MALE		MALE		0.0611737		0.0951113		76.342		39.7782		0.580548		0.4018		0.00346021		0.00163532		157.5		512.5
G6AE3		G6AE3		29		29		99		99		95.6284		93.2176		MALE		MALE		0.0432254		0.231255		18.4828		21.2954		0.327129		0.101892		0.00244499		0.00397614		352.5		42.5
G6AE3		G6AE3		29		29		99		99		95.6284		93.2176		MALE		MALE		0.0258468		0.0866129		30.135		59.8682		0.157363		0.325371		0.00146199		0.0014892		492.5		487.5
G6AE3		G6AE3		29		29		99		99		93.2176		93.2176		MALE		MALE		0.0188579		0.137985		42.9926		74.333		0.333276		0.516201		0.00125156		0.00237248		670		277.5
G6AE3		G6AE3		29		29		99		99		93.2176		93.2176		MALE		MALE		0.0438009		0.164295		43.3944		21.2954		0.323839		0.220678		0.00290698		0.00282486		210		257.5
G6AE3		G6AE3		29		29		99		99		93.2176		93.2176		MALE		MALE		0.0457979		0.0354854		26.5188		26.117		0.201664		0.156859		0.00303951		0.000610128		197.5		1472.5
G6AE3		G6AE3		29		29		99		99		93.2176		93.2176		MALE		MALE		0.0199174		0.104983		55.8502		49.4214		0.215638		0.254749		0.00132188		0.00180505		497.5		360
G6AE3		G6AE3		29		29		99		99		93.2176		98.8428		MALE		MALE		0.0280848		0.376063		68.306		88.9509		0.371228		0.747486		0.00186393		0.00382409		352.5		142.5
G6AE3		G6AE3		29		29		99		99		93.2176		98.8428		MALE		MALE		0.0516895		0.387168		59.8682		88.7978		0.52516		0.7462		0.00343053		0.00393701		177.5		135
G6AE3		G6AE3		29		29		99		99		93.2176		98.8428		MALE		MALE		0.00697893		0.443975		66.297		92.8158		0.283321		0.832429		0.000463177		0.00451467		1925		110
G6AE3		G6AE3		29		29		99		99		93.2176		98.8428		MALE		MALE		0.031788		0.470529		36.5638		94.8248		0.343322		0.850447		0.0021097		0.00478469		367.5		97.5
G6AE3		G6AE3		29		29		99		99		93.2176		96.432		MALE		MALE		0.0680248		0.418061		16.4738		85.1816		0.162303		0.882711		0.00451467		0.00522193		120		95
G6AE3		G6AE3		29		29		99		99		98.8428		96.432		MALE		MALE		0.390685		0.331506		87.5924		87.5924		0.842235		0.70639		0.00409836		0.00414079		140		117.5
G6AE3		G6AE3		29		29		99		99		98.8428		96.432		MALE		MALE		0.390685		0.402305		92.8158		71.5204		0.851521		0.851433		0.00409836		0.00502513		135		115
G6AE3		G6AE3		29		29		99		99		98.8428		96.432		MALE		MALE		0.450719		0.321521		95.2266		79.1546		0.938193		0.679439		0.00472813		0.00401606		110		132.5
G6AE3				29				99				98.8428				MALE				0.485125				92.0122				0.978853				0.00508906				102.5
G6AE3				29				99				96.432				MALE				0.403225				89.1996				0.924348				0.00472813				115
G6AE3				29				99				96.432				MALE				0.418049				83.9762				0.87022				0.00490196				107.5
G6AE3				29				99				96.432				MALE				0.360601				87.9942				0.866938				0.00422833				135
G6AE3				29				99				96.432				MALE				0.403225				73.5294				0.761963				0.00472813				115
G6AE3				29				99				96.432				MALE				0.317034				83.9762				0.705682				0.00371747				150
G6AE5	G6AE5	G6AE5	G6AE5	30	30	30	30	100	100	100	100	96.432	96.432	96.432	96.432	MALE	MALE	MALE	MALE	0.350981	0.330498	0.301123	0.370215	89.1996	77.5474		80.2003	0.799996	0.63825		0.646777	0.00472813	0.00446429	0.00451467	0.00515464	100	102.5	122.5	70
G6AE5	G6AE5	G6AE5	G6AE5	30	30	30	30	100	100	100	100	96.432	96.432	96.432	96.432	MALE	MALE	MALE	MALE	0.301146	0.270189	0.301123	0.280007	74.333	69.5114	82.369	75.9402	0.652044	0.596664	0.692176	0.612421	0.0040568	0.00364964	0.00451467	0.00389864	132.5	157.5	102.5	132.5
G6AE5	G6AE5	G6AE5	G6AE5	30	30	30	30	100	100	100	100	96.432	96.432	96.432	96.432	MALE	MALE	MALE	MALE	0.266066	0.272676	0.234855	0.252893	70.315	73.5294	72.324	69.9132	0.630628	0.690417	0.529846	0.563816	0.00358423	0.00368324	0.00352113	0.00352113	167.5	165	147.5	160
G6AE5	G6AE5	G6AE5	G6AE5	30	30	30	30	100	100	100	100	96.432	96.432	96.432	96.432	MALE	MALE	MALE	MALE	0.286612	0.265346	0.257524	0.282763	74.7348	70.7168	70.7168	69.5114	0.670267	0.570297	0.634231	0.57211	0.003861	0.00358423	0.003861	0.00393701	147.5	155	147.5	132.5
G6AE5	G6AE5	G6AE5	G6AE5	30	30	30	30	100	100	100	100	96.432	94.0212	96.432	96.432	MALE	MALE	MALE	MALE	0.246211	0.162716	0.247951	0.246387	67.5024	84.378	68.7078	67.5024	0.513326	0.694469	0.565496	0.503749	0.00331675	0.00431965	0.00371747	0.00343053	170	110	147.5	157.5
G6AE5	G6AE5	G6AE5	G6AE5	30	30	30	30	100	100	100	100	94.0212	94.0212	96.432	94.0212	MALE	MALE	MALE	MALE	0.141731	0.159276	0.230792	0.215535	88.396	85.5834	65.0916	82.7708	0.775404	0.70439	0.597171	0.710479	0.00456621	0.00422833	0.00346021	0.00441501	105	115	180	110
G6AE5	G6AE5	G6AE5	G6AE5	30	30	30	30	100	100	100	100	94.0212	94.0212	94.0212	94.0212	MALE	MALE	MALE	MALE	0.127209	0.136234	0.194445	0.200077	87.1906	64.6898	90.0032	85.1816	0.717618	0.511382	0.625022	0.701083	0.00409836	0.00361664	0.00401606	0.00409836	122.5	150	105	122.5
G6AE5	G6AE5	G6AE5	G6AE5	30	30	30	30	100	100	100	100	94.0212	94.0212	94.0212	94.0212	MALE	MALE	MALE	MALE	0.124655	0.0862973	0.20691	0.204262	78.351	65.4934	85.5834	77.5474	0.595825	0.53904	0.626985	0.625382	0.00401606	0.00229095	0.0042735	0.0041841	117.5	315	97.5	115
G6AE5	G6AE5	G6AE5	G6AE5	30	30	30	30	100	100	100	100	94.0212	94.0212	94.0212	94.0212	MALE	MALE	MALE	MALE	0.118696	0.109502	0.223635	0.161919	27.7242	63.0826	56.252	35.7602	0.374651	0.498677	0.632045	0.335777	0.00382409	0.00290698	0.00461894	0.00331675	187.5	217.5	127.5	195
G6AE5	G6AE5	G6AE5	G6AE5	30	30	30	30	100	100	100	100	94.0212	94.0212	94.0212	94.0212	MALE	MALE	MALE	MALE	0.245368	0.0950032	0.0985084	0.339019	18.4828	32.5458	67.9042	19.2864	0.327129	0.399335	0.479888	0.438327	0.00790514	0.00252207	0.00203459	0.00694444	70	315	350	100
G6AE5	G6AE5	G6AE5	G6AE5	30	30	30	30	100	100	100	100	94.0212	95.2266	94.0212	94.0212	MALE	MALE	MALE	MALE	0.0870661	0.0794354	0.175106	0.155474	76.7438	77.5474	53.8412	64.288	0.490376	0.695492	0.572779	0.454332	0.00280505	0.0041841	0.00361664	0.00318471	200	127.5	182.5	172.5
G6AE5	G6AE5	G6AE5	G6AE5	30	30	30	30	100	100	100	100	94.0212	95.2266	94.0212	94.0212	MALE	MALE	MALE	MALE	0.0763568	0.0733014	0.0937404	0.150675	35.7602	56.252	40.9836	38.9746	0.208514	0.453645	0.228959	0.437917	0.00246002	0.003861	0.00193611	0.00308642	235	135	337.5	235
G6AE5	G6AE5	G6AE5	G6AE5	30	30	30	30	100	100	100	100	94.0212	95.2266	95.2266	95.2266	MALE	MALE	MALE	MALE	0.0929313	0.0991386	0.0929112	0.258859	28.126	22.9026	79.9582	80.36	0.393371	0.424122	0.596703	0.661399	0.00299401	0.00522193	0.0040568	0.00389864	262.5	137.5	112.5	135
G6AE5	G6AE5	G6AE5	G6AE5	30	30	30	30	100	100	100	100	95.2266	95.2266	95.2266	95.2266	MALE	MALE	MALE	MALE	0.240062	0.0555931	0.113661	0.269361	82.369	75.5384	40.18	73.9312	0.755679	0.524572	0.478333	0.621271	0.00389864	0.00292826	0.00496278	0.0040568	147.5	197.5	117.5	127.5
G6AE5	G6AE5	G6AE5	G6AE5	30	30	30	30	100	100	100	100	95.2266	95.2266	95.2266	95.2266	MALE	MALE	MALE	MALE	0.247293	0.0634952	0.0948348	0.138617	81.5654	75.1366	26.5188	73.1276	0.715486	0.550451	0.249003	0.516803	0.00401606	0.00334448	0.00414079	0.00208768	135	162.5	135	337.5
G6AE5	G6AE5	G6AE5	G6AE5	30	30	30	30	100	100	100	100	95.2266	95.2266	95.2266	95.2266	MALE	MALE	MALE	MALE	0.125922	0.0547909	0.0685707	0.206524	77.1456	30.135	75.1366	74.333	0.545199	0.40723	0.472557	0.53477	0.00204499	0.002886	0.00299401	0.00311042	347.5	272.5	175	182.5
G6AE5	G6AE5	G6AE5	G6AE5	30	30	30	30	100	100	100	100	95.2266	95.2266	95.2266	95.2266	MALE	MALE	MALE	MALE	0.193028	0.0577053	0.0785681	0.200294	75.5384	24.9116	69.1096	57.8592	0.574437	0.389244	0.479928	0.388317	0.0031348	0.00303951	0.00343053	0.00301659	187.5	265	147.5	182.5
G6AE5	G6AE5	G6AE5	G6AE5	30	30	30	30	100	100	100	100	95.2266	93.2176	95.2266	93.2176	MALE	MALE	MALE	MALE	0.224729	0.244786	0.071795	0.295926	53.8412	71.9222	9.6432	77.5474	0.517704	0.407491	0.264197	0.557895	0.00364964	0.00323625	0.0031348	0.00431965	170	132.5	282.5	92.5
G6AE5	G6AE5	G6AE5	G6AE5	30	30	30	30	100	100	100	100	93.2176	93.2176	95.2266	93.2176	MALE	MALE	MALE	MALE	0.250867	0.238985	0.061649	0.194899	84.378	74.333	22.099	70.7168	0.694469	0.482682	0.271153	0.559026	0.00343053	0.00315956	0.00269179	0.00284495	170	162.5	290	225
G6AE5	G6AE5	G6AE5	G6AE5	30	30	30	30	100	100	100	100	93.2176	93.2176	93.2176	93.2176	MALE	MALE	MALE	MALE	0.330147	0.333946	0.237465	0.235015	79.1546	32.144	82.369	53.8412	0.709907	0.483368	0.738735	0.493956	0.00451467	0.00441501	0.0041841	0.00343053	110	160	127.5	182.5
G6AE5	G6AE5	G6AE5	G6AE5	30	30	30	30	100	100	100	100	93.2176	93.2176	93.2176	93.2176	MALE	MALE	MALE	MALE	0.202289	0.156279	0.166191	0.161573	76.7438	81.5654	74.7348	57.0556	0.594913	0.529645	0.341255	0.489748	0.00276625	0.00206612	0.00292826	0.00235849	232.5	330	122.5	307.5
G6AE5	G6AE5	G6AE5	G6AE5	30	30	30	30	100	100	100	100	93.2176	94.8248	93.2176	93.2176	MALE	MALE	MALE	MALE	0.242546	0.107908	0.227929	0.22722	59.0646	50.225	56.252	59.0646	0.506992	0.494828	0.504502	0.476327	0.00331675	0.00315956	0.00401606	0.00331675	185	215	137.5	177.5
G6AE5	G6AE5	G6AE5	G6AE5	30	30	30	30	100	100	100	100	93.2176	94.8248	93.2176	94.8248	MALE	MALE	MALE	MALE	0.182136	0.0951337	0.225663	0.1148	55.4484	66.6988	34.153	62.6808	0.574595	0.507215	0.494971	0.47666	0.00249066	0.00278552	0.00397614	0.00303951	305	227.5	182.5	197.5
G6AE5	G6AE5	G6AE5	G6AE5	30	30	30	30	100	100	100	100	93.2176	94.8248	93.2176	94.8248	MALE	MALE	MALE	MALE	0.22924	0.110528	0.118485	0.104479	66.297	68.306	57.4574	49.8232	0.476957	0.529504	0.504012	0.467823	0.0031348	0.00323625	0.00208768	0.00276625	180	180	365	255
G6AE5	G6AE5	G6AE5	G6AE5	30	30	30	30	100	100	100	100	94.8248	94.8248	93.2176	94.8248	MALE	MALE	MALE	MALE	0.116125	0.113277	0.201614	0.118399	62.279	64.288	51.0286	65.4934	0.50225	0.649374	0.502745	0.528173	0.00318471	0.00331675	0.0035524	0.0031348	190	202.5	180	195
G6AE5	G6AE5	G6AE5	G6AE5	30	30	30	30	100	100	100	100	94.8248	94.8248	94.8248	94.8248	MALE	MALE	MALE	MALE	0.100174	0.125794	0.120022	0.116572	61.4754	68.7078	57.4574	61.0736	0.434455	0.522493	0.345089	0.464438	0.00274725	0.00368324	0.00286533	0.00308642	222.5	140	182.5	192.5
G6AE5	G6AE5	G6AE5	G6AE5	30	30	30	30	100	100	100	100	94.8248	94.8248	94.8248	94.8248	MALE	MALE	MALE	MALE	0.108361	0.0691356	0.120888	0.148698	69.9132	35.3584	67.9042	66.297	0.485508	0.433845	0.41405	0.534653	0.00297177	0.00202429	0.002886	0.00393701	192.5	412.5	182.5	130
G6AE5	G6AE5	G6AE5	G6AE5	30	30	30	30	100	100	100	100	94.8248	94.8248	94.8248	94.8248	MALE	MALE	MALE	MALE	0.121951	0.10541	0.14494	0.0977211	62.6808	28.5278	67.9042	44.5998	0.442974	0.463867	0.516382	0.260057	0.00334448	0.00308642	0.00346021	0.00258732	157.5	262.5	157.5	215
G6AE5	G6AE5	G6AE5	G6AE5	30	30	30	30	100	101	100	100	94.8248	82.369	94.8248	94.8248	MALE	MALE	MALE	MALE	0.126171	0.277433	0.136664	0.0841185	75.9402	84.7798	65.0916	35.3584	0.509666	0.856362	0.583781	0.433845	0.00346021	0.00529101	0.00326264	0.00222717	140	90	195	367.5
G6AE5	G6AE5	G6AE5	G6AE5	30	30	30	30	100	101	100	101	94.8248	82.369	94.8248	82.369	MALE	MALE	MALE	MALE	0.128392	0.273811	0.160182	0.341227	40.9836	90.0032	61.0736	85.5834	0.330513	0.983642	0.492529	0.785169	0.00352113	0.00522193	0.00382409	0.00502513	160	100	137.5	90
G6AE5	G6AE5	G6AE5	G6AE5	30	30	30	30	100	101	100	101	94.8248	82.369	94.8248	82.369	MALE	MALE	MALE	MALE	0.0738124	0.266844	0.0927744	0.364098	36.162	77.9492	31.3404	90.8068	0.374736	0.731917	0.257946	0.779458	0.00202429	0.00508906	0.00221484	0.00536193	397.5	90	330	70
G6AE5	G6AE5	G6AE5	G6AE5	30	30	30	30	101	101	100	101	82.369	82.369	94.8248	82.369	MALE	MALE	MALE	MALE	0.340456	0.214897	0.111999	0.293323	90.405	67.9042	26.117	53.0376	0.869279	0.742122	0.330595	0.595928	0.00508906	0.00409836	0.0026738	0.00431965	92.5	152.5	295	142.5
G6AE5	G6AE5	G6AE5	G6AE5	30	30	30	30	101	101	101	101	82.369	82.369	82.369	82.369	MALE	MALE	MALE	MALE	0.4018	0.236726	0.260973	0.287121	82.7708	80.7618	92.8158	79.1546	0.904599	0.776556	0.748515	0.679439	0.00600601	0.00451467	0.00490196	0.00422833	75	117.5	80	120
G6AE5	G6AE5	G6AE5	G6AE5	30	30	30	30	101	101	101	101	82.369	82.369	82.369	82.369	MALE	MALE	MALE	MALE	0.288984	0.228973	0.281685	0.272708	63.8862	43.3944	90.405	63.4844	0.67964	0.652547	0.848873	0.465087	0.00431965	0.00436681	0.00529101	0.00401606	137.5	162.5	82.5	112.5
G6AE5	G6AE5	G6AE5	G6AE5	30	30	30	30	101	101	101	101	82.369	79.1546	82.369	79.1546	MALE	MALE	MALE	MALE	0.271398	0.331861	0.274425	0.297215	79.9582	87.1906	68.306	79.9582	0.717114	0.663046	0.562189	0.671918	0.0040568	0.0046729	0.00515464	0.00484262	135	82.5	72.5	87.5
G6AE5	G6AE5	G6AE5	G6AE5	30	30	30	30	101	101	101	101	82.369	79.1546	82.369	79.1546	MALE	MALE	MALE	MALE	0.312615	0.310123	0.205554	0.259514	62.6808	83.9762	76.342	86.387	0.649542	0.663843	0.615661	0.656935	0.0046729	0.00436681	0.003861	0.00422833	117.5	102.5	135	105
G6AE5	G6AE5	G6AE5	G6AE5	30	30	30	30	101	101	101	101	79.1546	79.1546	82.369	79.1546	MALE	MALE	MALE	MALE	0.333552	0.300288	0.251719	0.270971	90.8068	87.5924	72.7258	76.342	0.747381	0.679011	0.611141	0.669667	0.00478469	0.00422833	0.00472813	0.00441501	87.5	107.5	92.5	112.5
G6AE5	G6AE5	G6AE5	G6AE5	30	30	30	30	101	101	101	101	79.1546	79.1546	82.369	79.1546	MALE	MALE	MALE	MALE	0.321997	0.335783	0.218191	0.216109	83.1726	20.8936	30.135	57.0556	0.684548	0.405701	0.35875	0.353285	0.00461894	0.00472813	0.00409836	0.00352113	95	160	160	122.5
G6AE5	G6AE5	G6AE5	G6AE5	30	30	30	30	101	101	101	101	79.1546	79.1546	79.1546	79.1546	MALE	MALE	MALE	MALE	0.291683	0.0612754	0.320624	0.0441864	85.1816	24.9116	89.1996	59.8682	0.686948	0.361038	0.678324	0.446778	0.0041841	0.000862813	0.00451467	0.000719942	115	1090	90	1255
G6AE5	G6AE5	G6AE5	G6AE5	30	30	30	30	101	101	101	101	79.1546	79.1546	79.1546	90.8068	MALE	MALE	MALE	MALE	0.345967	0.197822	0.320624	0.0372489	51.0286	67.5024	79.5564	66.6988	0.55769	0.438327	0.641584	0.455282	0.00496278	0.00278552	0.00451467	0.00303951	110	205	97.5	182.5
G6AE5	G6AE5	G6AE5	G6AE5	30	30	30	30	101	101	101	101	79.1546	90.8068	79.1546	90.8068	MALE	MALE	MALE	MALE	0.0472946	0.151706	0.328028	0.0435343	71.5204	69.5114	73.5294	68.7078	0.399555	0.518742	0.674582	0.577376	0.000678426	0.00315956	0.00461894	0.0035524	1295	182.5	107.5	162.5
G6AE5	G6AE5	G6AE5	G6AE5	30	30	30	30	101	101	101	101	90.8068	90.8068	79.1546	90.8068	MALE	MALE	MALE	MALE	0.117853	0.192832	0.256847	0.0468639	71.9222	67.1006	15.6702	58.6628	0.445339	0.588602	0.3198	0.473087	0.00303951	0.00401606	0.00361664	0.00382409	167.5	135	227.5	137.5
G6AE5	G6AE5	G6AE5	G6AE5	30	30	30	30	101	101	101	101	90.8068	90.8068	79.1546	90.8068	MALE	MALE	MALE	MALE	0.152652	0.176851	0.0641827	0.0477774	65.8952	66.6988	38.5728	56.252	0.649214	0.657131	0.287857	0.427772	0.00393701	0.00368324	0.000903751	0.00389864	152.5	170	972.5	125
G6AE5	G6AE5	G6AE5	G6AE5	30	30	30	30	101	101	101	101	90.8068	90.8068	79.1546	90.8068	MALE	MALE	MALE	MALE	0.14687	0.194787	0.195105	0.0265545	65.4934	30.5368	69.1096	49.4214	0.517734	0.4592	0.448764	0.424218	0.00378788	0.0040568	0.00274725	0.00216685	137.5	180	210	345
G6AE5	G6AE5	G6AE5	G6AE5	30	30	30	30	101	101	101	101	90.8068	90.8068	90.8068	90.8068	MALE	MALE	MALE	MALE	0.15417	0.241282	0.153521	0.0290745	59.4664	20.8936	72.7258	53.8412	0.499718	0.405701	0.480038	0.517704	0.00397614	0.00502513	0.00306279	0.00237248	132.5	147.5	175	317.5
G6AE5	G6AE5	G6AE5	G6AE5	30	30	30	30	101	101	101	101	90.8068	90.8068	90.8068	90.8068	MALE	MALE	MALE	MALE	0.0858775	0.150518	0.197341	0.0364187	55.4484	44.5998	69.1096	15.6702	0.533158	0.399998	0.506297	0.2548	0.00221484	0.0031348	0.00393701	0.00297177	347.5	207.5	117.5	275
G6AE5	G6AE5	G6AE5	G6AE5	30	30	30	30	101	101	101	101	90.8068	90.8068	90.8068	90.8068	MALE	MALE	MALE	MALE	0.0849369	0.12753	0.201303	0.0518178	61.0736	59.8682	58.6628	26.9206	0.424122	0.464095	0.577959	0.420634	0.00219058	0.00265604	0.00401606	0.00422833	312.5	247.5	147.5	172.5
G6AE5	G6AE5	G6AE5	G6AE5	30	30	30	30	101	101	101	101	90.8068	90.8068	90.8068	96.8338	MALE	MALE	MALE	MALE	0.129678	0.0822176	0.203345	0.375757	27.7242	45.4034	24.9116	82.369	0.374651	0.45862	0.305664	0.952243	0.00334448	0.00171233	0.0040568	0.00529101	225	485	165	102.5
G6AE5	G6AE5	G6AE5	G6AE5	30	30	30	30	101	101	101	101	96.8338	96.8338	90.8068	96.8338	MALE	MALE	MALE	MALE	0.390695	0.4018	0.296595	0.375757	89.6014	86.7888	26.9206	89.1996	0.861552	0.855062	0.212811	0.878814	0.00502513	0.00484262	0.00591716	0.00529101	95	105	42.5	87.5
G6AE5	G6AE5	G6AE5	G6AE5	30	30	30	30	101	101	101	101	96.8338	96.8338	90.8068	96.8338	MALE	MALE	MALE	MALE	0.390695	0.444888	0.15713	0.356875	92.414	90.405	37.3674	88.7978	0.933475	0.936839	0.368152	0.833782	0.00502513	0.00536193	0.0031348	0.00502513	100	90	217.5	92.5
G6AE5	G6AE5	G6AE5	G6AE5	30	30	30	30	101	101	101	101	96.8338	96.8338	90.8068	96.8338	MALE	MALE	MALE	MALE	0.390695	0.450933	0.111636	0.343914	97.2356	92.0122	55.4484	65.8952	0.872068	1.0056	0.354303	0.633608	0.00502513	0.00543478	0.00222717	0.00484262	87.5	92.5	292.5	102.5
G6AE5	G6AE5	G6AE5	G6AE5	30	30	30	30	101	101	101	101	96.8338	96.8338	90.8068	93.2176	MALE	MALE	MALE	MALE	0.481414	0.439004	0.0829877	0.0518904	78.7528	80.36	49.8232	63.4844	0.966292	0.878251	0.313353	0.419039	0.00619195	0.00529101	0.00165563	0.0034904	80	97.5	445	135
G6AE5	G6AE5	G6AE5	G6AE5	30	30	30	30	101	101	101	101	96.8338	93.2176	96.8338	93.2176	MALE	MALE	MALE	MALE	0.36331	0.0505667	0.393531	0.0642186	71.1186	71.5204	89.6014	75.5384	0.700676	0.722428	0.861552	0.563719	0.0046729	0.00340136	0.00484262	0.00431965	112.5	195	102.5	97.5
G6AE5	G6AE5	G6AE5	G6AE5	30	30	30	30	101	101	101	101	93.2176	93.2176	96.8338	93.2176	MALE	MALE	MALE	MALE	0.0448375	0.0603108	0.413558	0.0574	73.9312	69.5114	93.6194	70.315	0.407334	0.584129	0.858894	0.616798	0.00346021	0.0040568	0.00508906	0.003861	107.5	127.5	87.5	145
G6AE5	G6AE5	G6AE5	G6AE5	30	30	30	30	101	101	101	101	93.2176	93.2176	96.8338	93.2176	MALE	MALE	MALE	MALE	0.0591692	0.0609287	0.441652	0.0597052	74.333	78.351	91.2086	75.9402	0.681954	0.672541	0.877006	0.53668	0.00456621	0.00409836	0.00543478	0.00401606	110	127.5	80	107.5
G6AE5	G6AE5	G6AE5	G6AE5	30	30	30	30	101	101	101	101	93.2176	93.2176	96.8338	93.2176	MALE	MALE	MALE	MALE	0.0468646	0.0497211	0.467035	0.0563129	80.7618	75.9402	71.5204	28.5278	0.664706	0.470218	0.851433	0.361111	0.00361664	0.00334448	0.00574713	0.00378788	155	137.5	90	185
G6AE5	G6AE5	G6AE5	G6AE5	30	30	30	30	101	101	101	101	93.2176	93.2176	93.2176	93.2176	MALE	MALE	MALE	MALE	0.0510159	0.0123477	0.107933	0.0164454	81.5654	29.7332	73.9312	21.2954	0.597549	0.300335	0.678268	0.332741	0.00393701	0.000830565	0.00451467	0.00110619	117.5	1105	112.5	840
G6AE5	G6AE5	G6AE5	G6AE5	30	30	30	30	101	101	101	101	93.2176	93.2176	93.2176	97.2356	MALE	MALE	MALE	MALE	0.0477276	0.10324	0.0786418	0.450364	33.7512	21.2954	79.1546	90.405	0.4018	0.308629	0.651478	0.913182	0.00368324	0.00694444	0.00328947	0.00508906	187.5	75	182.5	97.5
G6AE5	G6AE5	G6AE5	G6AE5	30	30	30	30	101	101	101	101	93.2176	97.2356	93.2176	97.2356	MALE	MALE	MALE	MALE	0.014576	0.454801	0.0923054	0.474512	38.9746	92.414	71.9222	81.9672	0.245123	0.983128	0.490937	0.947598	0.00112486	0.00502513	0.003861	0.00536193	730	105	112.5	100
G6AE5	G6AE5	G6AE5	G6AE5	30	30	30	30	101	101	101	101	97.2356	97.2356	93.2176	97.2356	MALE	MALE	MALE	MALE	0.43605	0.466523	0.0989942	0.456167	96.432	91.6104	79.9582	87.1906	0.927231	0.974579	0.608047	0.90353	0.00508906	0.00515464	0.00414079	0.00515464	92.5	100	110	97.5
G6AE5	G6AE5	G6AE5	G6AE5	30	30	30	30	101	101	101	101	97.2356	97.2356	93.2176	97.2356	MALE	MALE	MALE	MALE	0.459431	0.478865	0.0923054	0.439188	85.9852	86.7888	63.8862	82.369	0.939729	0.948511	0.468031	0.755679	0.00536193	0.00529101	0.003861	0.00496278	95	97.5	122.5	92.5
G6AE5	G6AE5	G6AE5	G6AE5	30	30	30	30	101	101	101	101	97.2356	97.2356	93.2176	81.5654	MALE	MALE	MALE	MALE	0.472087	0.478865	0.0206274	0.235936	88.396	88.7978	41.3854	82.7708	0.966077	0.920184	0.388595	0.574797	0.00550964	0.00529101	0.000862813	0.00441501	90	92.5	1052.5	82.5
G6AE5	G6AE5	G6AE5	G6AE5	30	30	30	30	101	101	101	101	97.2356	81.5654	93.2176	81.5654	MALE	MALE	MALE	MALE	0.441669	0.186581	0.101087	0.246833	83.5744	82.369	17.2774	73.1276	0.866056	0.722535	0.280933	0.589739	0.00515464	0.00431965	0.00422833	0.00461894	97.5	117.5	175	92.5
G6AE5	G6AE5	G6AE5	G6AE5	30	30	30	30	101	101	101	101	81.5654	81.5654	97.2356	81.5654	MALE	MALE	MALE	MALE	0.0997848	0.180726	0.427447	0.212483	83.9762	79.1546	93.6194	79.9582	0.650978	0.613602	0.922359	0.596703	0.00441501	0.0041841	0.00472813	0.00397614	97.5	110	110	117.5
G6AE5	G6AE5	G6AE5	G6AE5	30	30	30	30	101	101	101	101	81.5654	81.5654	97.2356	81.5654	MALE	MALE	MALE	MALE	0.0976296	0.157641	0.491332	0.20633	83.1726	67.5024	84.378	36.9656	0.620691	0.431325	0.922164	0.37339	0.00431965	0.00364964	0.00543478	0.003861	97.5	117.5	92.5	160
G6AE5	G6AE5	G6AE5	G6AE5	30	30	30	30	101	101	101	101	81.5654	81.5654	97.2356	81.5654	MALE	MALE	MALE	MALE	0.0965865	0.0404055	0.460076	0.0713477	76.342	57.0556	91.6104	22.5008	0.603494	0.35884	0.902566	0.304065	0.0042735	0.000935454	0.00508906	0.00133511	107.5	910	95	675
G6AE5	G6AE5	G6AE5	G6AE5	30	30	30	30	101	101	101	101	81.5654	81.5654	97.2356	81.5654	MALE	MALE	MALE	MALE	0.0889813	0.0662985	0.484745	0.123846	27.3224	27.3224	83.5744	44.198	0.335244	0.306993	0.866056	0.2695	0.00393701	0.00153492	0.00536193	0.0023175	172.5	562.5	90	267.5
G6AE5	G6AE5	G6AE5	G6AE5	30	30	30	30	101	102	101	102	81.5654	94.0212	81.5654	94.0212	MALE	MALE	MALE	MALE	0.0306874	0.300881	0.222129	0.291139	35.3584	77.1456	84.7798	85.1816	0.263869	0.724372	0.743682	0.731173	0.00135777	0.0046729	0.00515464	0.00472813	602.5	107.5	80	95
G6AE5	G6AE5	G6AE5	G6AE5	30	30	30	30	101	102	101	102	81.5654	94.0212	81.5654	94.0212	MALE	MALE	MALE	MALE	0.0517784	0.304437	0.19238	0.294621	48.6178	83.1726	77.9492	69.5114	0.291999	0.799737	0.71513	0.720325	0.00229095	0.00472813	0.00446429	0.00478469	270	107.5	115	112.5
G6AE5	G6AE5	G6AE5	G6AE5	30	30	30	30	101	102	101	102	81.5654	94.0212	81.5654	94.0212	MALE	MALE	MALE	MALE	0.0117776	0.311808	0.176611	0.284415	10.045	82.369	80.7618	76.342	0.177788	0.79201	0.638433	0.752138	0.000521105	0.00484262	0.00409836	0.00461894	1862.5	102.5	117.5	115
G6AE5	G6AE5	G6AE5	G6AE5	30	30	30	30	102	102	101	102	94.0212	94.0212	81.5654	94.0212	MALE	MALE	MALE	MALE	0.314637	0.294011	0.169658	0.294621	75.5384	95.2266	65.4934	87.5924	0.8036	0.800224	0.479805	0.785582	0.00529101	0.00456621	0.00393701	0.00478469	95	100	117.5	97.5
G6AE5	G6AE5	G6AE5	G6AE5	30	30	30	30	102	102	101	102	94.0212	94.0212	81.5654	94.0212	MALE	MALE	MALE	MALE	0.25413	0.188546	0.042186	0.369825	86.387	59.8682	51.4304	40.9836	0.741519	0.712717	0.414761	0.573197	0.0042735	0.00292826	0.000978953	0.00600601	117.5	257.5	897.5	95
G6AE5	G6AE5	G6AE5	G6AE5	30	30	30	30	102	102	101	102	94.0212	95.2266	81.5654	95.2266	MALE	MALE	MALE	MALE	0.284528	0.0867155	0.104722	0.376687	81.9672	78.7528	38.9746	96.8338	0.769645	0.622552	0.437917	0.909238	0.00478469	0.00536193	0.00243013	0.00609756	102.5	60	322.5	57.5
G6AE5	G6AE5	G6AE5	G6AE5	30	30	30	30	102	102	102	102	94.0212	95.2266	94.0212	95.2266	MALE	MALE	MALE	MALE	0.268471	0.0721984	0.333849	0.278902	94.423	103.664	72.324	77.1456	0.777144	0.819481	0.712552	0.820698	0.00451467	0.00446429	0.00490196	0.00451467	100	97.5	102.5	127.5
G6AE5	G6AE5	G6AE5	G6AE5	30	30	30	30	102	102	102	102	94.0212	95.2266	94.0212	95.2266	MALE	MALE	MALE	MALE	0.374003	0.0721984	0.318248	0.310436	38.9746	73.1276	80.36	85.1816	0.633733	0.614518	0.754554	0.635684	0.00628931	0.00446429	0.0046729	0.00502513	97.5	105	107.5	65
G6AE5	G6AE5	G6AE5	G6AE5	30	30	30	30	102	102	102	102	95.2266	95.2266	94.0212	95.2266	MALE	MALE	MALE	MALE	0.443714	0.0276926	0.291047	0.245633		27.7242	93.2176	65.0916		0.469902	0.736898	0.485758	0.00719424	0.00171233	0.0042735	0.00397614	52.5	525	107.5	117.5
G6AE5	G6AE5	G6AE5	G6AE5	30	30	30	30	102	102	102	102	95.2266	95.2266	94.0212	95.2266	MALE	MALE	MALE	MALE	0.394098	0.0441267	0.375235	0.0640838	91.6104	22.099	78.351	57.4574	0.925358	0.451	0.791424	0.463366	0.00638978	0.00272851	0.00550964	0.00103734	57.5	317.5	82.5	840
G6AE5	G6AE5	G6AE5	G6AE5	30	30	30	30	102	102	102	102	95.2266	66.6988	94.0212	66.6988	MALE	MALE	MALE	MALE	0.250208	0.359342	0.192387	0.326703	94.0212	83.9762	61.0736	76.342	0.758235	0.638602	0.560308	0.716826	0.0040568	0.00515464	0.00282486	0.00638978	122.5	62.5	245	50
G6AE5	G6AE5	G6AE5	G6AE5	30	30	30	30	102	102	102	102	95.2266	66.6988	95.2266	66.6988	MALE	MALE	MALE	MALE	0.370428	0.139704	0.123725	0.230831	71.9222	49.0196	93.2176	45.8052	0.745308	0.318309	0.875283	0.393178	0.00600601	0.00200401	0.00609756	0.00451467	70	345	57.5	105
G6AE5	G6AE5	G6AE5	G6AE5	30	30	30	30	102	102	102	102	95.2266	66.6988	95.2266	66.6988	MALE	MALE	MALE	MALE	0.26642	0.33759	0.100699	0.0971112	57.0556	35.3584	84.7798	65.8952	0.548612	0.447575	0.578702	0.501104	0.00431965	0.00484262	0.00496278	0.00189934	127.5	127.5	55	395
G6AE5	G6AE5	G6AE5	G6AE5	30	30	30	30	102	102	102	102	95.2266	66.6988	95.2266	66.6988	MALE	MALE	MALE	MALE	0.0633227	0.0555919	0.105958	0.0352857	63.4844	26.117	85.1816	67.5024	0.533482	0.392737	0.781483	0.665048	0.00102669	0.000797448	0.00522193	0.000690131	855	1187.5	82.5	1347.5
G6AE5	G6AE5	G6AE5	G6AE5	30	30	30	30	102	102	102	102	66.6988	66.6988	95.2266	66.6988	MALE	MALE	MALE	MALE	0.28447	0.38409	0.0905844	0.0658455	90.0032	31.3404	74.333	25.3134	0.740767	0.423519	0.554724	0.366861	0.00550964	0.00550964	0.00446429	0.00128783	60	107.5	90	707.5
G6AE5	G6AE5	G6AE5	G6AE5	30	30	30	30	102	102	102	102	66.6988	66.6988	95.2266	66.6988	MALE	MALE	MALE	MALE	0.292529	0.0886361	0.0916068	0.0948591	54.243	33.3494	22.9026	69.9132	0.627087	0.466425	0.38818	0.627024	0.00566572	0.00127146	0.00451467	0.00185529	90	715	162.5	427.5
G6AE5	G6AE5	G6AE5	G6AE5	30	30	30	30	102	102	102	102	66.6988	66.6988	95.2266	66.6988	MALE	MALE	MALE	MALE	0.0966878	0.195546	0.028221	0.20742	60.27	34.153	20.09	46.6088	0.565915	0.477664	0.302105	0.375877	0.00187266	0.00280505	0.00139082	0.0040568	427.5	285	652.5	122.5
G6AE5	G6AE5	G6AE5	G6AE5	30	30	30	30	102	102	102	102	66.6988	66.6988	66.6988	93.2176	MALE	MALE	MALE	MALE	0.035571	0.318321	0.361939	0.301101	62.279	73.1276	75.5384	73.9312	0.645378	0.545728	0.597142	0.69419	0.000688942	0.00456621	0.00529101	0.00496278	1355	85	62.5	95
G6AE5	G6AE5	G6AE5	G6AE5	30	30	30	30	102	102	102	102	66.6988	93.2176	66.6988	93.2176	MALE	MALE	MALE	MALE	0.0667071	0.44412	0.13989	0.297411	35.3584	90.405	48.216	91.6104	0.2296	0.810807	0.294	0.821618	0.00129199	0.00484262	0.00204499	0.00490196	620	95	325	92.5
G6AE5	G6AE5	G6AE5	G6AE5	30	30	30	30	102	102	102	102	66.6988	93.2176	66.6988	93.2176	MALE	MALE	MALE	MALE	0.0907404	0.485243	0.305386	0.308762	75.5384	96.8338	28.5278	95.6284	0.597142	0.888383	0.350034	0.771197	0.00175747	0.00529101	0.00446429	0.00508906	442.5	80	142.5	72.5
G6AE5	G6AE5	G6AE5	G6AE5	30	30	30	30	102	102	102	102	66.6988	93.2176	66.6988	93.2176	MALE	MALE	MALE	MALE	0.250031	0.438808	0.0539058	0.251229	42.5908	92.414	46.207	32.5458	0.441355	0.730545	0.27752	0.328745	0.00484262	0.00478469	0.000788022	0.00414079	110	82.5	1102.5	142.5
G6AE5	G6AE5	G6AE5	G6AE5	30	30	30	30	102	102	102	102	93.2176	93.2176	66.6988	93.2176	MALE	MALE	MALE	MALE	0.323649	0.08326	0.361939	0.0740803	97.2356	81.1636	34.153	56.6538	0.712349	0.480258	0.394832	0.558166	0.00422833	0.000907853	0.00529101	0.001221	100	932.5	102.5	717.5
G6AE5	G6AE5	G6AE5	G6AE5	30	30	30	30	102	102	102	102	93.2176	97.2356	66.6988	93.2176	MALE	MALE	MALE	MALE	0.384638	0.404293	0.079635	0.173845	95.2266	89.1996	21.2954	53.0376	0.800224	0.948932	0.204763	0.475674	0.00502513	0.00496278	0.00116414	0.00286533	80	107.5	755	237.5
G6AE5	G6AE5	G6AE5	G6AE5	30	30	30	30	102	102	102	102	93.2176	97.2356	66.6988	97.2356	MALE	MALE	MALE	MALE	0.415994	0.436809	0.249659	0.498322	94.0212	92.414	42.189	85.9852	0.807049	0.910483	0.303518	0.939729	0.00543478	0.00536193	0.00364964	0.00558659	67.5	85	135	87.5
G6AE5	G6AE5	G6AE5	G6AE5	30	30	30	30	102	102	102	102	93.2176	97.2356	66.6988	97.2356	MALE	MALE	MALE	MALE	0.459717	0.389784	0.335326	0.442678	31.7422	90.8068	59.0646	87.5924	0.516133	0.873142	0.518111	0.842235	0.00600601	0.00478469	0.00490196	0.00496278	105	105	90	97.5
G6AE5	G6AE5	G6AE5	G6AE5	30	30	30	30	102	102	102	102	93.2176	97.2356	93.2176	97.2356	MALE	MALE	MALE	MALE	0.089107	0.425404	0.275064	0.478282	51.0286	78.7528	92.8158	74.7348	0.528794	0.860686	0.779965	0.839717	0.00116414	0.00522193	0.0046729	0.00536193	762.5	100	95	97.5
G6AE5	G6AE5	G6AE5	G6AE5	30	30	30	30	102	102	102	102	93.2176	97.2356	93.2176	97.2356	MALE	MALE	MALE	MALE	0.195512	0.410717	0.292128	0.393817	70.315	97.6374	100.048	86.387	0.38741	1.01179	0.790895	0.725941	0.00255428	0.00522193	0.00496278	0.00441501	210	95	75	107.5
G6AE5	G6AE5	G6AE5	G6AE5	30	30	30	30	102	102	102	102	97.2356	97.2356	93.2176	97.2356	MALE	MALE	MALE	MALE	0.388493	0.465399	0.364481	0.385371	89.1996	98.8428	65.0916	100.852	0.857688	1.11059	0.731366	0.830056	0.0042735	0.00591716	0.00619195	0.0046729	130	80	72.5	92.5
G6AE5	G6AE5	G6AE5	G6AE5	30	30	30	30	102	102	102	102	97.2356	97.2356	93.2176	97.2356	MALE	MALE	MALE	MALE	0.474711	0.421728	0.0679327	0.460723	94.0212	105.272	27.3224	90.405	0.926317	1.06335	0.369222	0.988033	0.00522193	0.00536193	0.00115407	0.00558659	90	87.5	792.5	87.5
G6AE5	G6AE5	G6AE5	G6AE5	30	30	30	30	102	102	102	102	97.2356	97.2356	93.2176	97.2356	MALE	MALE	MALE	MALE	0.45682	0.427458	0.26575	0.467249	90.8068	69.9132	55.4484	97.6374	0.852646	0.913898	0.497295	1.01179	0.00502513	0.00543478	0.00451467	0.00566572	92.5	107.5	110	80
G6AE5	G6AE5	G6AE5	G6AE5	30	30	30	30	102	102	102	102	97.2356	96.8338	97.2356	97.2356	MALE	MALE	MALE	MALE	0.494061	0.569217	0.424071	0.442195	80.36	83.9762	90.8068	82.369	0.854894	0.893364	0.873142	0.79201	0.00543478	0.00574713	0.00461894	0.00536193	90	80	112.5	82.5
G6AE5	G6AE5	G6AE5	G6AE5	30	30	30	30	102	102	102	102	97.2356	96.8338	97.2356	96.8338	MALE	MALE	MALE	MALE	0.384386	0.491532	0.485774	0.525258	87.1906	94.423	92.8158	88.7978	0.70315	0.930276	0.832429	0.970468	0.00422833	0.00496278	0.00529101	0.00558659	112.5	100	77.5	87.5
G6AE5	G6AE5	G6AE5	G6AE5	30	30	30	30	102	102	102	102	97.2356	96.8338	97.2356	96.8338	MALE	MALE	MALE	MALE	0.426705	0.504039	0.527651	0.497467	97.6374	94.0212	73.9312	83.1726	0.938821	0.949709	0.935838	0.934524	0.00550964	0.00508906	0.00574713	0.00529101	77.5	97.5	95	100
G6AE5	G6AE5	G6AE5	G6AE5	30	30	30	30	102	102	102	102	97.2356	91.2086	97.2356	96.8338	MALE	MALE	MALE	MALE	0.420907	0.309426	0.405348	0.478479	100.048	80.7618	85.9852	88.7978	1.03677	0.758327	0.722565	0.920184	0.00543478	0.00502513	0.00441501	0.00508906	87.5	92.5	107.5	100
G6AE5	G6AE5	G6AE5	G6AE5	30	30	30	30	102	102	102	102	97.2356	91.2086	97.2356	96.8338	MALE	MALE	MALE	MALE	0.432665	0.387269	0.414556	0.497467	102.459	61.0736	96.432	85.5834	1.03494	0.649719	0.884697	0.864479	0.00558659	0.00628931	0.00529101	0.00529101	80	65	80	90
G6AE5	G6AE5	G6AE5	G6AE5	30	30	30	30	102	102	102	102	97.2356	91.2086	97.2356	91.2086	MALE	MALE	MALE	MALE	0.511201	0.0529002	0.437715	0.359281	71.5204	79.1546	100.852	75.5384	1.00029	0.679439	0.925246	0.763014	0.00660066	0.000859107	0.00558659	0.00529101	80	1047.5	70	90
G6AE5	G6AE5	G6AE5	G6AE5	30	30	30	30	102	102	102	102	96.8338	91.2086	97.2356	91.2086	MALE	MALE	MALE	MALE	0.492436	0.294621	0.492774	0.0606829	90.8068	77.9492	89.1996	50.6268	0.992424	0.683765	0.974859	0.708067	0.00574713	0.00478469	0.00628931	0.000893655	82.5	95	67.5	1047.5
G6AE5	G6AE5	G6AE5	G6AE5	30	30	30	30	102	102	102	102	96.8338	91.2086	97.2356	91.2086	MALE	MALE	MALE	MALE	0.420019	0.218742	0.425821	0.306565	93.6194	58.6628	71.5204	79.1546	0.858894	0.641123	0.851433	0.743236	0.00490196	0.0035524	0.00543478	0.00451467	95	190	100	115
G6AE5	G6AE5	G6AE5	G6AE5	30	30	30	30	102	102	102	102	96.8338	93.2176	96.8338	91.2086	MALE	MALE	MALE	MALE	0.42523	0.43984	0.556211	0.269997	96.432	96.8338	95.6284	67.5024	0.845895	0.909238	0.919504	0.4116	0.00496278	0.00591716	0.00550964	0.00397614	87.5	62.5	77.5	87.5
G6AE5	G6AE5	G6AE5	G6AE5	30	30	30	30	102	102	102	102	96.8338	93.2176	96.8338	91.2086	MALE	MALE	MALE	MALE	0.492436	0.433429	0.527166	0.278296	84.378	79.9582	92.414	57.8592	0.897638	0.898407	0.793253	0.615523	0.00574713	0.0058309	0.00522193	0.00409836	80	82.5	75	150
G6AE5	G6AE5	G6AE5	G6AE5	30	30	30	30	102	102	102	102	91.2086	93.2176	96.8338	93.2176	MALE	MALE	MALE	MALE	0.368406	0.56527	0.534139	0.270902	80.36	36.162	89.6014	87.9942	0.704912	0.702175	0.861552	0.911857	0.00536193	0.00760456	0.00529101	0.00566572	72.5	80	85	80
G6AE5	G6AE5	G6AE5	G6AE5	30	30	30	30	102	102	102	102	91.2086	93.2176	96.8338	93.2176	MALE	MALE	MALE	MALE	0.354164	0.398568	0.507298	0.274794	93.6194	25.7152	92.414	78.7528	0.839636	0.553015	0.828825	0.816091	0.00515464	0.00536193	0.00502513	0.00574713	82.5	140	87.5	77.5
G6AE5	G6AE5	G6AE5	G6AE5	30	30	30	30	102	102	102	102	91.2086	93.2176	91.2086	93.2176	MALE	MALE	MALE	MALE	0.0618154	0.34735	0.319497	0.274794	58.261	74.7348	78.7528	61.0736	0.443049	0.774454	0.706303	0.667471	0.000899685	0.0046729	0.00508906	0.00574713	980	117.5	85	82.5
G6AE5	G6AE5	G6AE5	G6AE5	30	30	30	30	102	102	102	102	91.2086	95.6284	91.2086	93.2176	MALE	MALE	MALE	MALE	0.310193	0.420019	0.477424	0.136029	80.36	80.7618	40.9836	78.351	0.737248	0.83691	0.640369	0.771931	0.00451467	0.00490196	0.00760456	0.00284495	112.5	107.5	67.5	250
G6AE5	G6AE5	G6AE5	G6AE5	30	30	30	30	102	102	102	102	91.2086	95.6284	91.2086	93.2176	MALE	MALE	MALE	MALE	0.275935	0.344112	0.0661552	0.125332	64.6898	71.1186	39.3764	38.171	0.406854	0.637835	0.387945	0.515824	0.00401606	0.00401606	0.00105374	0.00262123	90	137.5	847.5	307.5
G6AE5	G6AE5	G6AE5	G6AE5	30	30	30	30	102	102	102	102	91.2086	95.6284	91.2086	95.6284	MALE	MALE	MALE	MALE	0.262745	0.279556	0.259964	0.369064	76.7438	55.0466	82.7708	78.351	0.60667	0.769883	0.606379	0.595825	0.00382409	0.00326264	0.00414079	0.00446429	135	235	105	92.5
G6AE5	G6AE5	G6AE5	G6AE5	30	30	30	30	102	102	102	102	93.2176	95.6284	91.2086	95.6284	MALE	MALE	MALE	MALE	0.212788	0.382517	0.311569	0.349558	95.2266	81.9672	78.7528	40.9836	0.986804	0.849401	0.67599	0.4879	0.00591716	0.00446429	0.00496278	0.00422833	72.5	127.5	85	152.5
G6AE5	G6AE5	G6AE5	G6AE5	30	30	30	30	102	102	102	102	93.2176	88.7978	91.2086	95.6284	MALE	MALE	MALE	MALE	0.22617	0.263997	0.227057	0.255155	76.342	94.8248	59.0646	81.5654	0.936712	0.813947	0.581917	0.63229	0.00628931	0.00502513	0.00361664	0.00308642	77.5	82.5	175	195
G6AE5	G6AE5	G6AE5	G6AE5	30	30	30	30	102	102	102	102	93.2176	88.7978	93.2176	95.6284	MALE	MALE	MALE	MALE	0.203746	0.267355	0.398828	0.415429	73.5294	85.1816	90.405	76.7438	0.782228	0.731173	0.89069	0.737921	0.00566572	0.00508906	0.00591716	0.00502513	82.5	80	67.5	95
G6AE5	G6AE5	G6AE5	G6AE5	30	30	30	30	102	102	102	102	93.2176	88.7978	93.2176	88.7978	MALE	MALE	MALE	MALE	0.0994775	0.183369	0.398828	0.0605729	82.7708	53.4394	87.5924	87.1906	0.777191	0.414259	0.822464	0.748417	0.00276625	0.0034904	0.00591716	0.00502513	255	157.5	62.5	82.5
G6AE5	G6AE5	G6AE5	G6AE5	30	30	30	30	102	102	102	102	93.2176	88.7978	93.2176	88.7978	MALE	MALE	MALE	MALE	0.147382	0.0899578	0.41735	0.0629452	14.8666	48.216	73.9312	87.9942	0.407304	0.405176	0.880133	0.755315	0.00409836	0.00171233	0.00619195	0.00522193	207.5	465	77.5	75
G6AE5	G6AE5	G6AE5	G6AE5	30	30	30	30	102	102	102	102	95.6284	88.7978	93.2176	88.7978	MALE	MALE	MALE	MALE	0.382994	0.109677	0.314962	0.0520691	77.5474	51.0286	34.9566	75.5384	0.63825	0.419988	0.456949	0.506969	0.00456621	0.00208768	0.0046729	0.00431965	97.5	357.5	137.5	82.5
G6AE5	G6AE5	G6AE5	G6AE5	30	30	30	30	102	98	102	102	95.6284	96.432	93.2176	88.7978	MALE	MALE	MALE	MALE	0.416257	0.224742	0.543564	0.0504351	29.7332	65.4934	24.108	20.8936	0.550615	0.614962	0.376687	0.405701	0.00496278	0.0034904	0.00806452	0.0041841	147.5	180	60	187.5
G6AE5	G6AE5	G6AE5	G6AE5	30	30	30	30	102	98	102	102	95.6284	96.432	93.2176	88.7978	MALE	MALE	MALE	MALE	0.637838	0.251027	0.398828	0.0396513	16.8756	78.7528	48.216	23.7062	0.383536	0.622552	0.725053	0.370409	0.00760456	0.00389864	0.00591716	0.00328947	87.5	130	102.5	240
G6AE5	G6AE5	G6AE5	G6AE5	30	30	30	30	102	98	102	102	95.6284	96.432	95.6284	88.7978	MALE	MALE	MALE	MALE	0.358443	0.16989	0.38631	0.037493	78.351	66.6988	83.5744	30.9386	0.718817	0.560494	0.8036	0.448386	0.0042735	0.00263852	0.0046729	0.00311042	125	260	110	252.5
G6AE5	G6AE5	G6AE5	G6AE5	30	30	30	30	102	98	102	102	95.6284	96.432	95.6284	88.7978	MALE	MALE	MALE	MALE	0.411156	0.217162	0.37323	0.0655109	81.9672	66.6988	59.0646	13.6612	0.769645	0.572522	0.663647	0.329186	0.00490196	0.00337268	0.00451467	0.00543478	97.5	180	132.5	142.5
G6AE5	G6AE5	G6AE5	G6AE5	30	30	30	30	102	98	102	102	88.7978	96.432	95.6284	88.7978	MALE	MALE	MALE	MALE	0.221088	0.201845	0.228687	0.0489006	96.0302	58.261	73.5294	30.135	0.790372	0.434784	0.569995	0.49	0.00490196	0.0031348	0.00276625	0.0040568	82.5	185	232.5	185
G6AE5	G6AE5	G6AE5	G6AE5	30	30	30	30	102	98	102	102	88.7978	94.8248	95.6284	88.7978	MALE	MALE	MALE	MALE	0.241834	0.195034	0.395552	0.0372037	87.5924	71.9222	79.9582	16.4738	0.751866	0.745308	0.768829	0.279217	0.00536193	0.00364964	0.00478469	0.00308642	70	177.5	105	265
G6AE5	G6AE5	G6AE5	G6AE5	30	30	30	30	102	98	102	98	88.7978	94.8248	88.7978	96.432	MALE	MALE	MALE	MALE	0.221088	0.244016	0.238277	0.147371	63.0826	80.36	92.0122	70.7168	0.553356	0.720717	0.699713	0.559026	0.00490196	0.00456621	0.00422833	0.00328947	90	107.5	105	177.5
G6AE5	G6AE5	G6AE5	G6AE5	30	30	30	30	102	98	102	98	88.7978	94.8248	88.7978	96.432	MALE	MALE	MALE	MALE	0.156062	0.221281	0.306263	0.157749	16.072	79.1546	88.7978	76.342	0.28446	0.709907	0.796393	0.655296	0.00346021	0.00414079	0.00543478	0.00352113	232.5	130	72.5	167.5
G6AE5	G6AE5	G6AE5	G6AE5	30	30	30	30	102	98	102	98	88.7978	94.8248	88.7978	96.432	MALE	MALE	MALE	MALE	0.148362	0.219014	0.302158	0.147371	14.4648	69.1096	79.5564	55.8502	0.267867	0.546321	0.729875	0.38123	0.00328947	0.00409836	0.00536193	0.00328947	250	117.5	77.5	157.5
G6AE5	G6AE5	G6AE5	G6AE5	30	30	30	30	102	98	102	98	88.7978	94.8248	88.7978	96.432	MALE	MALE	MALE	MALE	0.0998938	0.15881	0.205666	0.126556	40.5818	72.7258	51.4304	76.7438	0.211915	0.611141	0.391106	0.542359	0.00221484	0.00297177	0.00364964	0.00282486	260	217.5	142.5	212.5
G6AE5	G6AE5	G6AE5	G6AE5	30	30	30	30	102	98	102	98	88.7978	94.8248	88.7978	96.432	MALE	MALE	MALE	MALE	0.15881	0.155347	0.103589	0.149835	22.9026	43.3944	37.3674	65.0916	0.357853	0.501669	0.419858	0.524932	0.00352113	0.00290698	0.00183824	0.00334448	220	257.5	455	175
G6AE5	G6AE5	G6AE5	G6AE5	30	30	30	30	98	98	102	98	96.432	92.414	88.7978	96.432	MALE	MALE	MALE	MALE	0.115276	0.250191	0.107543	0.104431	64.288	57.0556	56.6538	31.7422	0.589798	0.641074	0.373952	0.389475	0.00331675	0.00371747	0.0019084	0.002331	192.5	180	372.5	347.5
G6AE5	G6AE5	G6AE5	G6AE5	30	30	30	30	98	98	98	98	96.432	92.414	96.432	94.8248	MALE	MALE	MALE	MALE	0.120262	0.236977	0.193108	0.254069	81.5654	70.7168	72.324	62.279	0.731528	0.714311	0.549992	0.534584	0.00346021	0.00352113	0.00337268	0.0035524	177.5	185	165	165
G6AE5	G6AE5	G6AE5	G6AE5	30	30	30	30	98	98	98	98	96.432	92.414	96.432	94.8248	MALE	MALE	MALE	MALE	0.0974914	0.250191	0.244686	0.322891	67.1006	73.9312	65.8952	71.1186	0.328925	0.728386	0.578028	0.683833	0.00280505	0.00371747	0.0042735	0.00451467	152.5	167.5	120	117.5
G6AE5	G6AE5	G6AE5	G6AE5	30	30	30	30	98	98	98	98	96.432	92.414	96.432	94.8248	MALE	MALE	MALE	MALE	0.11722	0.252538	0.146249	0.302412	69.5114	70.315	74.333	74.7348	0.560576	0.710253	0.498879	0.6415	0.00337268	0.00375235	0.00255428	0.00422833	172.5	167.5	242.5	120
G6AE5	G6AE5	G6AE5	G6AE5	30	30	30	30	98	98	98	98	96.432	92.414	96.432	94.8248	MALE	MALE	MALE	MALE	0.109813	0.287613	0.189905	0.302412	72.7258	60.27	69.5114	74.333	0.53279	0.7175	0.482718	0.652044	0.00315956	0.0042735	0.00331675	0.00422833	180	150	157.5	122.5
G6AE5	G6AE5	G6AE5	G6AE5	30	30	30	30	98	98	98	98	96.432	92.414	96.432	94.8248	MALE	MALE	MALE	MALE	0.115276	0.257367	0.218954	0.233346	17.6792	66.297	44.5998	59.8682	0.380198	0.622507	0.462174	0.503094	0.00331675	0.00382409	0.00382409	0.00326264	255	155	165	187.5
G6AE5	G6AE5	G6AE5	G6AE5	30	30	30	30	98	98	98	98	94.8248	98.0392	94.8248	94.8248	MALE	MALE	MALE	MALE	0.204595	0.231985	0.177795	0.206408	70.7168	61.0736	70.315	65.4934	0.491089	0.455773	0.728653	0.387535	0.00334448	0.00286533	0.00389864	0.002886	155	215	160	177.5
G6AE5	G6AE5	G6AE5	G6AE5	30	30	30	30	98	98	98	98	94.8248	98.0392	94.8248	92.414	MALE	MALE	MALE	MALE	0.273098	0.212222	0.215623	0.211651	82.369	88.7978	79.1546	65.4934	0.692176	0.53332	0.743236	0.479805	0.00446429	0.00262123	0.00472813	0.00334448	105	215	105	162.5
G6AE5	G6AE5	G6AE5	G6AE5	30	30	30	30	98	98	98	98	94.8248	98.0392	94.8248	92.414	MALE	MALE	MALE	MALE	0.28586	0.230335	0.188838	0.237462	75.5384	84.378	77.1456	65.8952	0.693013	0.55695	0.662194	0.510816	0.0046729	0.00284495	0.00414079	0.00375235	105	200	125	137.5
G6AE5	G6AE5	G6AE5	G6AE5	30	30	30	30	98	98	98	98	94.8248	98.0392	94.8248	92.414	MALE	MALE	MALE	MALE	0.255958	0.246087	0.174395	0.235255	79.1546	78.351	68.306	65.4934	0.679439	0.563676	0.474347	0.517734	0.0041841	0.00303951	0.00382409	0.00371747	122.5	190	117.5	142.5
G6AE5	G6AE5	G6AE5	G6AE5	30	30	30	30	98	98	98	98	94.8248	98.0392	94.8248	92.414	MALE	MALE	MALE	MALE	0.176548	0.172262	0.147587	0.242002	71.1186	64.288	71.1186	65.0916	0.408728	0.479761	0.61046	0.535733	0.002886	0.00214362	0.00323625	0.00382409	172.5	332.5	192.5	140
G6AE5	G6AE5	G6AE5	G6AE5	30	30	30	30	98	98	98	98	94.8248	98.0392	94.8248	92.414	MALE	MALE	MALE	MALE	0.236193	0.0935506	0.151258	0.273363	51.8322	52.234	31.7422	54.243	0.418002	0.479211	0.477326	0.665558	0.003861	0.00116414	0.00331675	0.00431965	135	750	235	150
G6AE5	G6AE5	G6AE5	G6AE5	30	30	30	30	98	98	98	98	92.414	98.0392	92.414	98.0392	MALE	MALE	MALE	MALE	0.21246	0.248025	0.211751	0.226564	54.6448	71.9222	69.5114	68.7078	0.525431	0.580018	0.518742	0.554095	0.00311042	0.00308642	0.00308642	0.00274725	217.5	200	190	240
G6AE5	G6AE5	G6AE5	G6AE5	30	30	30	30	98	98	98	98	92.414	98.0392	92.414	98.0392	MALE	MALE	MALE	MALE	0.217535	0.238811	0.248128	0.212004	67.1006	77.1456	68.306	68.306	0.53044	0.609847	0.61261	0.529504	0.00318471	0.00297177	0.00361664	0.00257069	187.5	210	165	260
G6AE5	G6AE5	G6AE5	G6AE5	30	30	30	30	98	98	98	98	92.414	98.0392	92.414	98.0392	MALE	MALE	MALE	MALE	0.240514	0.246126	0.267475	0.248777	74.7348	75.1366	70.315	71.5204	0.518992	0.504272	0.630628	0.601012	0.00352113	0.00306279	0.00389864	0.00301659	140	177.5	145	212.5
G6AE5	G6AE5	G6AE5	G6AE5	30	30	30	30	98	98	98	98	92.414	98.0392	92.414	98.0392	MALE	MALE	MALE	MALE	0.251587	0.233605	0.239467	0.250667	73.5294	79.1546	70.315	73.1276	0.501907	0.46837	0.534715	0.526098	0.00368324	0.00290698	0.0034904	0.00303951	125	175	155	190
G6AE5	G6AE5	G6AE5	G6AE5	30	30	30	30	98	98	98	98	92.414	95.2266	92.414	98.0392	MALE	MALE	MALE	MALE	0.298279	0.284634	0.281178	0.216172	58.261	71.9222	57.0556	77.1456	0.574	0.482699	0.535733	0.425045	0.00436681	0.00311042	0.00409836	0.00262123	127.5	172.5	137.5	200
G6AE5	G6AE5	G6AE5	G6AE5	30	30	30	30	98	98	98	98	92.414	95.2266	92.414	98.0392	MALE	MALE	MALE	MALE	0.247038	0.280275	0.259876	0.542709	71.1186	71.5204	69.1096	24.9116	0.530736	0.588645	0.497191	0.440913	0.00361664	0.00306279	0.00378788	0.00694444	142.5	205	125	87.5
G6AE5	G6AE5	G6AE5	G6AE5	30	30	30	30	98	98	98	98	98.0392	95.2266	98.0392	98.0392	MALE	MALE	MALE	MALE	0.205497	0.280275	0.222991	0.219215	77.5474	73.1276	73.1276	37.7692	0.46575	0.467269	0.467269	0.30459	0.00269179	0.00306279	0.00258732	0.00280505	205	170	230	232.5
G6AE5	G6AE5	G6AE5	G6AE5	30	30	30	30	98	98	98	98	98.0392	95.2266	98.0392	98.0392	MALE	MALE	MALE	MALE	0.198807	0.0729744	0.252375	0.0899311	73.5294	85.9852	59.8682	78.7528	0.501907	0.39716	0.482808	0.47299	0.00260417	0.000797448	0.00292826	0.00115075	237.5	1037.5	217.5	702.5
G6AE5	G6AE5	G6AE5	G6AE5	30	30	30	30	98	98	98	98	98.0392	97.2356	98.0392	98.0392	MALE	MALE	MALE	MALE	0.211181	0.211492	0.208179	0.241204	83.5744	77.1456	74.333	74.7348	0.494523	0.634943	0.498879	0.47003	0.00276625	0.00340136	0.00241546	0.00308642	192.5	172.5	265	165
G6AE5	G6AE5	G6AE5	G6AE5	30	30	30	30	98	98	98	98	98.0392	97.2356	98.0392	98.0392	MALE	MALE	MALE	MALE	0.225198	0.144099	0.268075	0.237538	80.36	44.198	77.5474	75.5384	0.482643	0.542307	0.568113	0.506969	0.00294985	0.0023175	0.00311042	0.00303951	172.5	350	185	180
G6AE5	G6AE5	G6AE5	G6AE5	30	30	30	30	98	98	98	98	98.0392	97.2356	98.0392	98.0392	MALE	MALE	MALE	MALE	0.225198	0.213305	0.238412	0.235747	75.1366	79.9582	81.5654	71.5204	0.45815	0.619831	0.505049	0.601012	0.00294985	0.00343053	0.00276625	0.00301659	175	162.5	200	212.5
G6AE5	G6AE5	G6AE5	G6AE5	30	30	30	30	98	98	98	98	98.0392	97.2356	98.0392	95.2266	MALE	MALE	MALE	MALE	0.203999	0.198021	0.175651	0.219454	51.8322	76.7438	61.4754	68.7078	0.426602	0.562226	0.450369	0.468995	0.00257069	0.00318471	0.00216685	0.00318471	267.5	177.5	325	167.5
G6AE5	G6AE5	G6AE5	G6AE5	30	30	30	30	98	98	98	98	98.0392	97.2356	98.0392	95.2266	MALE	MALE	MALE	MALE	0.0913182	0.220883	0.173769	0.214335	72.324	51.0286	30.5368	69.1096	0.493679	0.502745	0.374685	0.471738	0.00115075	0.0035524	0.00214362	0.00311042	722.5	180	385	175
G6AE5	G6AE5	G6AE5	G6AE5	30	31	30	30	98	99	98	98	98.0392	102.057	98.0392	95.2266	MALE	MALE	MALE	MALE	0.230685	0.107705	0.195805	0.206313	81.9672	56.252	32.5458	75.5384	0.477943	0.598426	0.273494	0.498603	0.00290698	0.00203459	0.00241546	0.00299401	172.5	397.5	295	182.5
G6AE5	G6AE5	G6AE5	G6AE5	30	31	30	30	98	99	98	98	98.0392	102.057	98.0392	95.2266	MALE	MALE	MALE	MALE	0.244924	0.204391	0.233948	0.26865	78.7528	74.333	77.5474	37.7692	0.511382	0.611794	0.487719	0.424373	0.00308642	0.003861	0.002886	0.00389864	170	137.5	187.5	167.5
G6AE5	G6AE5	G6AE5	G6AE5	30	31	30	30	98	99	98	98	98.0392	102.057	98.0392	95.2266	MALE	MALE	MALE	MALE	0.232373	0.151682	0.240901	0.0737781	77.9492	47.8142	77.9492	44.5998	0.506164	0.552765	0.4753	0.450503	0.00292826	0.00286533	0.00297177	0.00107066	187.5	262.5	172.5	835
G6AE5	G6AE5	G6AE5	G6AE5	30	31	30	30	98	99	98	98	95.2266	102.057	98.0392	95.2266	MALE	MALE	MALE	MALE	0.228684	0.172715	0.246393	0.193292	73.1276	72.7258	75.5384	57.4574	0.467269	0.624256	0.453684	0.4729	0.00303951	0.00326264	0.00303951	0.00280505	172.5	190	162.5	235
G6AE5	G6AE5	G6AE5	G6AE5	30	31	30	30	98	99	98	98	95.2266	102.057	98.0392	97.2356	MALE	MALE	MALE	MALE	0.230435	0.212599	0.227386	0.267516	77.9492	40.9836	79.9582	74.7348	0.468163	0.535733	0.417536	0.557722	0.00306279	0.00401606	0.00280505	0.0034904	160	172.5	165	152.5
G6AE5	G6AE5	G6AE5	G6AE5	30	31	30	30	98	99	98	98	95.2266	102.057	95.2266	97.2356	MALE	MALE	MALE	MALE	0.235853	0.11856	0.185398	0.331073	77.5474	61.4754	71.5204	36.9656	0.47285	0.5166	0.505445	0.453566	0.0031348	0.00223964	0.00308642	0.00431965	155	327.5	182.5	150
G6AE5	G6AE5	G6AE5	G6AE5	30	31	30	30	98	99	98	98	95.2266	93.2176	95.2266	97.2356	MALE	MALE	MALE	MALE	0.209574	0.245593	0.179848	0.154367	43.3944	80.7618	73.9312	77.9492	0.239088	0.693234	0.457778	0.59277	0.00278552	0.00431965	0.00299401	0.0020141	177.5	115	172.5	365
G6AE5	G6AE5	G6AE5	G6AE5	30	31	30	30	98	99	98	98	95.2266	93.2176	95.2266	97.2356	MALE	MALE	MALE	MALE	0.0907564	0.300819	0.18684	0.254207	42.9926	35.3584	77.5474	74.333	0.314964	0.625812	0.495511	0.576225	0.00120627	0.00529101	0.00311042	0.00331675	692.5	132.5	165	172.5
G6AE5	G6AE5	G6AE5	G6AE5	30	31	30	30	98	99	98	98	95.2266	93.2176	95.2266	97.2356	MALE	MALE	MALE	MALE	0.180641	0.150012	0.194398	0.246046	70.315	33.3494	69.1096	70.7168	0.38741	0.501495	0.479928	0.570297	0.00240096	0.00263852	0.00323625	0.00321027	235	312.5	165	187.5
G6AE5	G6AE5	G6AE5	G6AE5	30	31	30	31	98	99	98	99	97.2356	93.2176	95.2266	102.057	MALE	MALE	MALE	MALE	0.274239	0.20378	0.137615	0.201782	79.9582	46.6088	22.099		0.565076	0.571887	0.475247		0.00346021	0.00358423	0.00229095	0.00292826	147.5	197.5	390	252.5
G6AE5	G6AE5	G6AE5	G6AE5	30	31	30	31	98	99	98	99	97.2356	93.2176	95.2266	102.057	MALE	MALE	MALE	MALE	0.274239	0.20378	0.0742511	0.447459	48.216	67.9042	65.4934		0.346878	0.669007	0.365885		0.00346021	0.00358423	0.00123609	0.00649351	150	177.5	630	107.5
G6AE5	G6AE5	G6AE5	G6AE5	30	31	30	31	98	99	98	99	97.2356	93.2176	97.2356	102.057	MALE	MALE	MALE	MALE	0.186922	0.219516	0.225722	0.232407	75.1366	60.27	78.351	71.1186	0.618408	0.552936	0.584709	0.562202	0.00235849	0.003861	0.003861	0.00337268	302.5	150	125	170
G6AE5	G6AE5	G6AE5	G6AE5	30	31	30	31	98	99	98	99	97.2356	93.2176	97.2356	102.057	MALE	MALE	MALE	MALE	0.25443	0.20941	0.209541	0.258569	81.9672	54.243	75.1366	49.0196	0.569217	0.509324	0.571381	0.420769	0.00321027	0.00368324	0.00358423	0.00375235	167.5	165	147.5	150
G6AE5	G6AE5	G6AE5	G6AE5	30	31	30	31	98	99	98	99	97.2356	94.423	97.2356	102.057	MALE	MALE	MALE	MALE	0.250411	0.279421	0.130205	0.181817	76.7438	76.7438	53.4394	64.288	0.552114	0.688285	0.384456	0.518452	0.00315956	0.00352113	0.00222717	0.00263852	177.5	172.5	310	255
G6AE5	G6AE5	G6AE5	G6AE5	31	31	30	31	99	99	98	99	102.057	94.423	97.2356	102.057	MALE	MALE	MALE	MALE	0.231551	0.297769	0.19074	0.26865		57.0556	77.9492	61.4754		0.500488	0.490247	0.539258	0.00331675	0.00375235	0.00326264	0.00389864	242.5	152.5	147.5	142.5
G6AE5	G6AE5	G6AE5	G6AE5	31	31	30	31	99	99	98	99	102.057	94.423	97.2356	102.057	MALE	MALE	MALE	MALE	0.35986	0.213608	0.193903	0.188018		65.0916	75.5384	39.3764		0.641297	0.475084	0.337995	0.00515464	0.00269179	0.00331675	0.00272851	127.5	270	142.5	250
G6AE5	G6AE5	G6AE5	G6AE5	31	31	30	31	99	99	98	99	102.057	94.423	97.2356	102.057	MALE	MALE	MALE	MALE	0.243675	0.306392	0.230165	0.18931	76.7438	74.333	40.9836	61.8772	0.618902	0.77029	0.435996	0.479668	0.0034904	0.003861	0.00393701	0.00274725	162.5	162.5	160	235
G6AE5	G6AE5	G6AE5	G6AE5	31	31	31	31	99	99	99	99	102.057	94.423	102.057	93.2176	MALE	MALE	MALE	MALE	0.301567	0.303463	0.0908791	0.250906	41.3854	74.333		73.5294	0.492683	0.697962		0.674582	0.00431965	0.00382409	0.00178094	0.00436681	147.5	155	410	120
G6AE5	G6AE5	G6AE5	G6AE5	31	31	31	31	99	99	99	99	102.057	96.8338	102.057	93.2176	MALE	MALE	MALE	MALE	0.172804	0.164295	0.244156	0.230753	72.7258	78.7528	55.4484	76.7438	0.574908	0.598881	0.589877	0.618902	0.00247525	0.00282486	0.00478469	0.00401606	277.5	222.5	115	125
G6AE5	G6AE5	G6AE5	G6AE5	31	31	31	31	99	99	99	99	102.057	96.8338	102.057	93.2176	MALE	MALE	MALE	MALE	0.254791	0.183762	0.121064	0.0963242	69.1096	75.1366	63.4844	52.234	0.546321	0.560721	0.303753	0.479211	0.00364964	0.00315956	0.00237248	0.00167645	147.5	182.5	212.5	487.5
G6AE5	G6AE5	G6AE5	G6AE5	31	31	31	31	99	99	99	99	102.057	96.8338	102.057	93.2176	MALE	MALE	MALE	MALE	0.217147	0.206609	0.202897	0.213596	30.5368	79.1546	65.4934	53.0376	0.308453	0.679439	0.550365	0.535733	0.00311042	0.0035524	0.00397614	0.00371747	222.5	165	132.5	170
G6AE5	G6AE5	G6AE5	G6AE5	31	31	31	31	99	99	99	99	102.057	96.8338	102.057	93.2176	MALE	MALE	MALE	MALE	0.174969	0.233577	0.15872	0.22621	74.333	84.7798	45.8052	60.27	0.554724	0.712435	0.25952	0.552936	0.00250627	0.00401606	0.00311042	0.00393701	265	130	145	145
G6AE5	G6AE5	G6AE5	G6AE5	31	31	31	31	99	99	99	99	93.2176	96.8338	102.057	93.2176	MALE	MALE	MALE	MALE	0.244436	0.123352	0.124006	0.221843	83.5744	52.6358	58.6628	50.6268	0.749546	0.248869	0.337143	0.498786	0.00451467	0.00212089	0.00243013	0.003861	110	260	237.5	157.5
G6AE5	G6AE5	G6AE5	G6AE5	31	31	31	31	99	99	99	99	93.2176	88.7978	93.2176	94.423	MALE	MALE	MALE	MALE	0.233877	0.180921	0.251984	0.213474	76.7438	57.0556	82.7708	68.7078	0.688285	0.523446	0.629436	0.577376	0.00431965	0.00368324	0.0042735	0.00284495	120	162.5	102.5	232.5
G6AE5	G6AE5	G6AE5	G6AE5	31	31	31	31	99	99	99	99	93.2176	88.7978	93.2176	94.423	MALE	MALE	MALE	MALE	0.0923147	0.209915	0.307907	0.276376	47.8142	69.9132	28.126	69.1096	0.471076	0.563816	0.393371	0.546321	0.00170503	0.0042735	0.00522193	0.00368324	485	110	120	145
G6AE5	G6AE5	G6AE5	G6AE5	31	31	31	31	99	99	99	99	93.2176	88.7978	93.2176	94.423	MALE	MALE	MALE	MALE	0.179577	0.189653	0.165397	0.218128	69.5114	86.7888	14.063	45.0016	0.549497	0.62438	0.319614	0.403602	0.00331675	0.003861	0.00280505	0.00290698	175	120	312.5	232.5
G6AE5	G6AE5	G6AE5	G6AE5	31	31	31	31	99	99	99	99	93.2176	88.7978	93.2176	94.423	MALE	MALE	MALE	MALE	0.195814	0.219286	0.205809	0.278945	64.6898	76.7438	47.8142	71.9222	0.449235	0.737921	0.52256	0.645042	0.00361664	0.00446429	0.0034904	0.00371747	132.5	120	195	157.5
G6AE5	G6AE5	G6AE5	G6AE5	31	31	31	31	99	99	99	99	93.2176	88.7978	93.2176	94.423	MALE	MALE	MALE	MALE	0.233877	0.153981	0.217179	0.259641	47.4124	39.7782	65.0916	77.1456	0.49132	0.348932	0.570979	0.526591	0.00431965	0.0031348	0.00368324	0.00346021	135	205	157.5	142.5
G6AE5	G6AE5	G6AE5	G6AE5	31	31	31	31	99	99	99	99	94.423	93.2176	93.2176	94.423	MALE	MALE	MALE	MALE	0.210973	0.259527	0.236804	0.327669	74.7348	67.9042	55.0466	68.7078	0.68564	0.722385	0.570431	0.630347	0.00278552	0.00371747	0.00401606	0.00436681	250	175	152.5	120
G6AE5	G6AE5	G6AE5	G6AE5	31	31	31	31	99	99	99	99	94.423	93.2176	93.2176	96.8338	MALE	MALE	MALE	MALE	0.262074	0.326228	0.205809	0.171615	78.7528	77.1456	54.243	76.7438	0.610487	0.662194	0.509324	0.532943	0.00346021	0.0046729	0.0034904	0.0031348	160	97.5	180	175
G6AE5	G6AE5	G6AE5	G6AE5	31	31	31	31	99	99	99	99	94.423	93.2176	94.423	96.8338	MALE	MALE	MALE	MALE	0.212452	0.257137	0.2891	0.180083	48.6178	27.3224	73.9312	73.9312	0.392079	0.50597	0.541621	0.608487	0.00280505	0.00368324	0.00375235	0.00328947	232.5	217.5	130	182.5
G6AE5	G6AE5	G6AE5	G6AE5	31	31	31	31	99	99	99	99	94.423	93.2176	94.423	96.8338	MALE	MALE	MALE	MALE	0.289634	0.158126	0.340155	0.213432	75.9402	67.5024	49.0196	77.9492	0.681078	0.633825	0.583567	0.628623	0.00382409	0.00226501	0.00441501	0.00389864	150	335	142.5	132.5
G6AE5	G6AE5	G6AE5	G6AE5	31	31	31	31	99	99	99	99	94.423	93.2176	94.423	96.8338	MALE	MALE	MALE	MALE	0.278966	0.269547	0.18723	0.205423	76.342	73.5294	77.5474	72.324	0.603494	0.659457	0.578712	0.529846	0.00368324	0.003861	0.00243013	0.00375235	145	147.5	277.5	130
G6AE5	G6AE5	G6AE5	G6AE5	31	31	31	31	99	99	99	99	94.423	93.2176	94.423	96.8338	MALE	MALE	MALE	MALE	0.323672	0.254791	0.291838	0.0929461	73.5294	67.1006	75.9402	46.6088	0.707013	0.541134	0.556338	0.437641	0.0042735	0.00364964	0.00378788	0.00169779	130	150	127.5	482.5
G6AE5		G6AE5	G6AE5	31		31	31	99		99	99	96.8338		94.423	88.7978	MALE		MALE	MALE	0.183625		0.303327	0.184678	78.351		72.324	70.7168	0.508773		0.620807	0.570297	0.00318471		0.00393701	0.00414079	160		137.5	117.5
G6AE5		G6AE5	G6AE5	31		31	31	99		99	99	96.8338		96.8338	88.7978	MALE		MALE	MALE	0.186596		0.175099	0.167354	81.5654		81.5654	57.4574	0.55676		0.55676	0.611249	0.00323625		0.002886	0.00375235	162.5		200	172.5
G6AE5		G6AE5	G6AE5	31		31	31	99		99	99	96.8338		96.8338	88.7978	MALE		MALE	MALE	0.224789		0.191696	0.162773	84.7798		78.351	75.5384	0.683708		0.544104	0.609181	0.00389864		0.00315956	0.00364964	132.5		172.5	150
G6AE5		G6AE5	G6AE5	31		31	31	99		99	99	96.8338		96.8338	88.7978	MALE		MALE	MALE	0.243798		0.208137	0.194759	70.315		81.9672	77.1456	0.603562		0.623325	0.662194	0.00422833		0.00343053	0.00436681	120		160	112.5
G6AE5		G6AE5	G6AE5	31		31	31	99		99	99	96.8338		96.8338	88.7978	MALE		MALE	MALE	0.0942899		0.248655	0.177335	56.252		83.9762	66.6988	0.353786		0.677227	0.463186	0.00163532		0.00409836	0.00397614	452.5		120	107.5
G6AE5		G6AE5	G6AE5	31		31	31	99		99	99	88.7978		96.8338	88.7978	MALE		MALE	MALE	0.226854		0.142255	0.0364377	61.0736		43.7962	40.9836	0.649719		0.189184	0.46049	0.00478469		0.00234467	0.000816993	115		195	1135
G6AE5		G6AE5	G6AE5	31		31	31	99		99	99	88.7978		96.8338	93.2176	MALE		MALE	MALE	0.165488		0.132183	0.297222	74.333		65.8952	69.1096	0.697962		0.457606	0.716162	0.0034904		0.00217865	0.00456621	180		315	122.5
G6AE5		G6AE5	G6AE5	31		31	31	99		99	99	88.7978		88.7978	93.2176	MALE		MALE	MALE	0.169937		0.184929	0.248916	81.1636		75.9402	60.6718	0.641609		0.666142	0.452775	0.00358423		0.0041841	0.00382409	152.5		125	127.5
G6AE5		G6AE5	G6AE5	31		31	31	99		99	99	88.7978		88.7978	93.2176	MALE		MALE	MALE	0.218995		0.162792	0.152618	75.9402		59.0646	31.3404	0.730194		0.476327	0.531193	0.00461894		0.00368324	0.00234467	112.5		147.5	367.5
G6AE5		G6AE5	G6AE5	31		31	31	99		99	99	88.7978		88.7978	93.2176	MALE		MALE	MALE	0.224172		0.159848	0.237561	59.4664		77.1456	69.5114	0.632621		0.492943	0.57211	0.00472813		0.00361664	0.00364964	117.5		120	152.5
G6AE5		G6AE5	G6AE5	31		31	31	99		99	99	88.7978		88.7978	93.2176	MALE		MALE	MALE	0.0377337		0.18888	0.251319	47.8142		79.9582	73.1276	0.428827		0.658092	0.566881	0.000795862		0.0042735	0.003861	1145		112.5	130
G6AE5		G6AE5	G6AE5	31		31	31	99		99	99	93.2176		88.7978	93.2176	MALE		MALE	MALE	0.270132		0.19092	0.22523	65.8952		79.9582	56.6538	0.604543		0.644824	0.572261	0.00422833		0.00431965	0.00346021	127.5		107.5	190
G6AE5		G6AE5		31		31		99		99		93.2176		88.7978		MALE		MALE		0.256571		0.175738		84.378		28.5278		0.756753		0.372912		0.00401606		0.00397614		137.5		175
G6AE5		G6AE5		31		31		99		99		93.2176		93.2176		MALE		MALE		0.298534		0.257593		46.207		68.306		0.51918		0.68996		0.0046729		0.00378788		125		165
G6AE5		G6AE5		31		31		99		99		93.2176		93.2176		MALE		MALE		0.133374		0.364636		42.5908		70.7168		0.312021		0.752306		0.00208768		0.00536193		342.5		92.5
G6AE5		G6AE5		31		31		99		99		93.2176		93.2176		MALE		MALE		0.237495		0.255177		75.1366		22.099		0.571381		0.475247		0.00371747		0.00375235		137.5		220
G6AE5		G6AE5		31		31		99		99		93.2176		93.2176		MALE		MALE		0.270132		0.145776		71.1186		77.9492		0.637835		0.641557		0.00422833		0.00214362		125		345
G6AE5		G6AE5		31		31		99		99		93.2176		93.2176		MALE		MALE		0.222988		0.250478		62.279		77.9492		0.546307		0.616199		0.0034904		0.00368324		172.5		145
		G6AE5				31				99				93.2176				MALE				0.260056				60.6718				0.499356				0.00382409				140
G6AE6	G6AE6	G6AE6	G6AE6	32	32	32	32	100	100	100	100	96.8338	96.8338	96.8338	96.8338	MALE	MALE	MALE	MALE	0.53513	0.500518	0.477558	0.523013	92.8158	88.7978	92.0122	90.0032	0.987402	1.02656	0.929416	0.957481	0.00600601	0.00574713	0.00558659	0.00558659	72.5	87.5	80	85
G6AE6	G6AE6	G6AE6	G6AE6	32	32	32	32	100	100	100	100	96.8338	96.8338	96.8338	96.8338	MALE	MALE	MALE	MALE	0.471424	0.473316	0.464581	0.458919	98.441	98.441	97.2356	93.6194	0.946548	1.02011	0.957986	0.786718	0.00529101	0.00543478	0.00543478	0.00490196	85	87.5	82.5	85
G6AE6	G6AE6	G6AE6	G6AE6	32	32	32	32	100	100	100	100	96.8338	96.8338	96.8338	96.8338	MALE	MALE	MALE	MALE	0.46527	0.416699	0.419034	0.458919	86.387	87.1906	85.9852	87.5924	0.811146	0.90353	0.868537	0.842235	0.00522193	0.00478469	0.00490196	0.00490196	85	112.5	105	100
G6AE6	G6AE6	G6AE6	G6AE6	32	32	32	32	100	100	100	100	96.8338	96.8338	96.8338	96.432	MALE	MALE	MALE	MALE	0.459274	0.432209	0.440634	0.358226	85.1816	82.7708	79.1546	91.2086	0.882711	0.836069	0.820255	0.818014	0.00515464	0.00496278	0.00515464	0.00456621	97.5	102.5	97.5	107.5
G6AE6	G6AE6	G6AE6	G6AE6	32	32	32	32	100	100	100	100	96.432	96.432	96.432	96.432	MALE	MALE	MALE	MALE	0.391098	0.42445	0.383963	0.354183	88.396	84.7798	94.8248	79.1546	0.849962	0.901913	0.764716	0.679439	0.00484262	0.00490196	0.0046729	0.00451467	102.5	110	90	105
G6AE6	G6AE6	G6AE6	G6AE6	32	32	32	32	100	100	100	100	96.432	96.432	96.432	96.432	MALE	MALE	MALE	MALE	0.411002	0.378113	0.397908	0.315066	72.7258	73.5294	85.9852	55.4484	0.773679	0.761963	0.788855	0.486389	0.00508906	0.00436681	0.00484262	0.00401606	102.5	132.5	97.5	135
G6AE6	G6AE6	G6AE6	G6AE6	32	32	32	32	100	100	100	100	96.432	96.432	96.432	96.432	MALE	MALE	MALE	MALE	0.360544	0.316014	0.423547	0.308864	51.8322	65.0916	60.27	80.36	0.551406	0.7749	0.787843	0.720717	0.00446429	0.00364964	0.00515464	0.00393701	130	190	117.5	142.5
G6AE6	G6AE6	G6AE6	G6AE6	32	32	32	32	100	100	100	100	96.432	96.432	96.432	96.432	MALE	MALE	MALE	MALE	0.261365	0.37403	0.261682	0.375366	87.9942	83.1726	77.9492	74.333	0.739447	0.799737	0.628623	0.732345	0.00323625	0.00431965	0.00318471	0.00478469	190	127.5	190	107.5
G6AE6	G6AE6	G6AE6	G6AE6	32	32	32	32	100	100	100	100	96.432	98.441	96.432	98.441	MALE	MALE	MALE	MALE	0.373034	0.615267	0.397908	0.552475	77.5474	100.048	76.342	101.655	0.728145	1.26643	0.752138	0.977456	0.00461894	0.00746269	0.00484262	0.00609756	110	55	105	60
G6AE6	G6AE6	G6AE6	G6AE6	32	32	32	32	100	100	100	100	98.441	98.441	98.441	98.441	MALE	MALE	MALE	MALE	0.261246	0.535362	0.541998	0.578951	102.861	89.6014	104.468	85.1816	1.30204	1.21083	1.14173	0.957097	0.00760456	0.00649351	0.00682594	0.00638978	52.5	80	55	67.5
G6AE6	G6AE6	G6AE6	G6AE6	32	32	32	32	100	100	100	100	98.441	98.441	98.441	98.441	MALE	MALE	MALE	MALE	0.238569	0.518527	0.515602	0.506178	90.8068	85.9852	84.7798	90.0032	1.14945	1.12399	1.07316	0.909123	0.00694444	0.00628931	0.00649351	0.00558659	65	82.5	75	80
G6AE6	G6AE6	G6AE6	G6AE6	32	32	32	32	100	100	100	100	98.441	98.441	98.441	100.852	MALE	MALE	MALE	MALE	0.209475	0.442069	0.469839	0.738622	92.414	83.9762	90.405	106.879	1.10017	1.06299	0.936839	1.27237	0.00609756	0.00536193	0.00591716	0.00660066	80	107.5	72.5	67.5
G6AE6	G6AE6	G6AE6	G6AE6	32	32	32	32	100	100	100	100	98.441	100.852	98.441	100.852	MALE	MALE	MALE	MALE	0.42152	0.796241	0.46299	0.81979	51.0286	84.378	82.369	99.6464	0.990847	1.372	0.952243	1.34657	0.0122699	0.00732601	0.0058309	0.00732601	30	75	85	62.5
G6AE6	G6AE6	G6AE6	G6AE6	32	32	32	32	100	100	100	100	98.441	100.852	100.852	100.852	MALE	MALE	MALE	MALE	0.365467	0.78192	0.759312	0.751015	40.18	111.7	96.8338	108.084	0.780194	1.25506	1.18814	1.21443	0.0106383	0.00719424	0.00638978	0.00671141	42.5	50	75	60
G6AE6	G6AE6	G6AE6	G6AE6	32	32	32	32	100	100	100	100	100.852	100.852	100.852	93.6194	MALE	MALE	MALE	MALE	0.779883	0.811096	0.903668	0.336003	92.414	104.468	104.468	87.5924	1.13391	1.32238	1.28182	0.70639	0.00694444	0.00746269	0.00760456	0.00436681	62.5	55	50	105
G6AE6	G6AE6	G6AE6	G6AE6	32	32	32	32	100	100	100	100	100.852	93.6194	100.852	93.6194	MALE	MALE	MALE	MALE	0.766574	0.32486	0.811142	0.351346	107.281	72.324	110.093	73.5294	1.31633	0.769404	1.2032	0.617894	0.00682594	0.00472813	0.00682594	0.00456621	65	117.5	55	100
G6AE6	G6AE6	G6AE6	G6AE6	32	32	32	32	100	100	100	100	100.852	93.6194	93.6194	93.6194	MALE	MALE	MALE	MALE	0.854016	0.306731	0.315252	0.332375	103.263	86.7888	83.9762	71.9222	1.34984	0.834508	0.691162	0.546937	0.00760456	0.00446429	0.00446429	0.00431965	55	120	102.5	100
G6AE6	G6AE6	G6AE6	G6AE6	32	32	32	32	100	100	100	100	100.852	93.6194	93.6194	93.6194	MALE	MALE	MALE	MALE	0.753712	0.239818	0.322449	0.218904	110.495	49.4214	79.9582	33.7512	1.24152	0.52576	0.644824	0.309644	0.00671141	0.0034904	0.00456621	0.00284495	60	192.5	95	242.5
G6AE6	G6AE6	G6AE6	G6AE6	32	32	32	32	100	100	100	100	93.6194	93.6194	93.6194	93.6194	MALE	MALE	MALE	MALE	0.308599	0.161097	0.346159	0.214331	73.1276	55.4484	76.342	77.9492	0.799209	0.6601	0.791109	0.616199	0.00515464	0.00234467	0.00490196	0.00278552	102.5	342.5	107.5	232.5
G6AE6	G6AE6	G6AE6	G6AE6	32	32	32	32	100	100	100	100	93.6194	93.6194	93.6194	98.0392	MALE	MALE	MALE	MALE	0.250495	0.253067	0.278017	0.435433	88.7978	64.288	46.207	91.2086	0.688355	0.529119	0.433869	0.877006	0.0041841	0.00368324	0.00393701	0.00446429	110	150	147.5	120
G6AE6	G6AE6	G6AE6	G6AE6	32	32	32	32	100	100	100	100	93.6194	98.0392	93.6194	98.0392	MALE	MALE	MALE	MALE	0.316763	0.449071	0.15219	0.516069	57.0556	95.6284	68.306	87.9942	0.641074	0.965943	0.49141	0.961685	0.00529101	0.00490196	0.00215517	0.00529101	100	105	325	97.5
G6AE6	G6AE6	G6AE6	G6AE6	32	32	32	32	100	100	100	100	93.6194	98.0392	93.6194	98.0392	MALE	MALE	MALE	MALE	0.131146	0.478383	0.250857	0.490135	58.6628	95.2266	58.261	91.2086	0.261887	0.938193	0.378318	0.898607	0.00219058	0.00522193	0.0035524	0.00502513	232.5	90	127.5	97.5
G6AE6	G6AE6	G6AE6	G6AE6	32	32	32	32	100	100	100	100	93.6194	98.0392	98.0392	98.0392	MALE	MALE	MALE	MALE	0.231151	0.51179	0.414959	0.530092	66.6988	90.405	88.396	89.6014	0.771084	1.01579	0.849962	0.953206	0.003861	0.00558659	0.00436681	0.00543478	172.5	90	125	90
G6AE6	G6AE6	G6AE6	G6AE6	32	32	32	32	100	100	100	100	93.6194	95.2266	98.0392	95.2266	MALE	MALE	MALE	MALE	0.170322	0.230811	0.477516	0.287702	49.8232	75.5384	90.405	78.7528	0.437046	0.873276	0.936839	0.837796	0.00284495	0.00496278	0.00502513	0.00543478	237.5	115	102.5	90
G6AE6	G6AE6	G6AE6	G6AE6	32	32	32	32	100	100	100	100	98.0392	95.2266	98.0392	95.2266	MALE	MALE	MALE	MALE	0.472706	0.252763	0.489823	0.259496	92.414	84.7798	92.414	84.7798	0.910483	0.878547	0.910483	0.743682	0.00490196	0.00543478	0.00515464	0.00490196	102.5	87.5	92.5	90
G6AE6	G6AE6	G6AE6	G6AE6	32	32	32	32	100	100	100	100	98.0392	95.2266	98.0392	95.2266	MALE	MALE	MALE	MALE	0.484583	0.212367	0.509521	0.236327	95.2266	80.7618	90.0032	78.351	0.91564	0.758327	0.957481	0.811927	0.00502513	0.00456621	0.00536193	0.00446429	95	112.5	92.5	127.5
G6AE6	G6AE6	G6AE6	G6AE6	32	32	32	32	100	100	100	100	98.0392	95.2266	95.2266	95.2266	MALE	MALE	MALE	MALE	0.517062	0.222528	0.167179	0.24737	89.6014	83.1726	82.7708	78.351	0.905065	0.861892	0.815476	0.658412	0.00536193	0.00478469	0.00472813	0.0046729	87.5	112.5	110	95
G6AE6	G6AE6	G6AE6	G6AE6	32	32	32	32	100	100	100	100	98.0392	95.2266	95.2266	95.2266	MALE	MALE	MALE	MALE	0.524087	0.20997	0.179941	0.216956	92.8158	59.4664	88.396	38.9746	0.914441	0.668162	0.792789	0.403882	0.00543478	0.00451467	0.00508906	0.00409836	82.5	132.5	85	147.5
G6AE6	G6AE6	G6AE6	G6AE6	32	32	32	32	100	100	100	100	95.2266	95.2266	95.2266	98.8428	MALE	MALE	MALE	MALE	0.222945	0.137193	0.161454	0.529092	79.5564	42.5908	79.9582	91.6104	0.747008	0.465473	0.658092	0.949331	0.00414079	0.00294985	0.00456621	0.00550964	135	247.5	97.5	85
G6AE6	G6AE6	G6AE6	G6AE6	32	32	32	32	100	100	100	100	95.2266	98.8428	95.2266	98.8428	MALE	MALE	MALE	MALE	0.277532	0.610913	0.17768	0.58555	91.2086	94.423	81.1636	85.5834	0.856419	1.06093	0.780419	0.989403	0.00515464	0.00628931	0.00502513	0.00609756	87.5	70	95	77.5
G6AE6	G6AE6	G6AE6	G6AE6	32	32	32	32	100	100	100	100	95.2266	98.8428	95.2266	98.8428	MALE	MALE	MALE	MALE	0.263927	0.592288	0.17768	0.536482	86.7888	88.396	50.225	88.396	0.778375	1.08461	0.635759	0.940383	0.00490196	0.00609756	0.00502513	0.00558659	92.5	82.5	120	85
G6AE6	G6AE6	G6AE6	G6AE6	32	32	32	32	100	100	100	100	95.2266	98.8428	95.2266	94.0212	MALE	MALE	MALE	MALE	0.240363	0.513943	0.132677	0.0597719	82.369	98.0392	22.5008	87.1906	0.79201	0.965903	0.511382	0.880713	0.00446429	0.00529101	0.00375235	0.00550964	120	87.5	222.5	82.5
G6AE6	G6AE6	G6AE6	G6AE6	32	32	32	32	100	100	100	100	95.2266	94.0212	98.8428	94.0212	MALE	MALE	MALE	MALE	0.305049	0.254406	0.50474	0.0519072	59.8682	87.1906	94.8248	81.1636	0.712717	0.781978	0.98264	0.841074	0.00566572	0.00502513	0.00550964	0.00478469	92.5	87.5	85	112.5
G6AE6	G6AE6	G6AE6	G6AE6	32	32	32	32	100	100	100	100	95.2266	94.0212	98.8428	94.0212	MALE	MALE	MALE	MALE	0.235114	0.245166	0.534171	0.0597719	44.5998	98.0392	89.1996	93.6194	0.515605	1.01595	1.03121	0.900187	0.00436681	0.00484262	0.0058309	0.00550964	142.5	110	85	77.5
G6AE6	G6AE6	G6AE6	G6AE6	32	32	32	32	100	100	100	100	98.8428	94.0212	98.8428	94.0212	MALE	MALE	MALE	MALE	0.50566	0.278936	0.519039	0.0552092	97.6374	92.8158	92.0122	58.6628	0.986236	0.89246	0.953494	0.503543	0.00522193	0.00550964	0.00566572	0.00508906	92.5	77.5	80	80
G6AE6	G6AE6	G6AE6	G6AE6	32	32	32	32	100	100	100	100	98.8428	94.0212	98.8428	94.0212	MALE	MALE	MALE	MALE	0.564629	0.118011	0.534171	0.0218502	91.2086	49.8232	85.1816	22.9026	1.02482	0.503265	0.984758	0.309495	0.0058309	0.002331	0.0058309	0.0020141	82.5	330	85	422.5
G6AE6	G6AE6	G6AE6	G6AE6	32	32	32	32	100	100	100	100	98.8428	94.0212	94.0212	94.0212	MALE	MALE	MALE	MALE	0.572981	0.0834737	0.235909	0.0651568	92.8158	38.5728	94.8248	20.09	1.04287	0.299014	0.831796	0.432043	0.00591716	0.0016488	0.00536193	0.00600601	80	477.5	72.5	120
G6AE6	G6AE6	G6AE6	G6AE6	32	32	32	32	100	100	100	100	98.8428	98.0392	94.0212	98.0392	MALE	MALE	MALE	MALE	0.526271	0.496056	0.223904	0.531243	96.432	104.87	85.5834	87.5924	0.950069	1.05929	0.70439	1.01263	0.00543478	0.00536193	0.00508906	0.0058309	82.5	87.5	75	85
G6AE6	G6AE6	G6AE6	G6AE6	32	32	32	32	100	100	100	100	94.0212	98.0392	94.0212	98.0392	MALE	MALE	MALE	MALE	0.246143	0.483104	0.221091	0.488516	92.414	96.0302	97.2356	96.8338	0.867737	0.923367	0.89207	0.931094	0.00536193	0.00522193	0.00502513	0.00536193	80	87.5	90	82.5
G6AE6	G6AE6	G6AE6	G6AE6	32	32	32	32	100	100	100	100	94.0212	98.0392	94.0212	98.0392	MALE	MALE	MALE	MALE	0.202674	0.483104	0.272428	0.488516	94.423	90.8068	81.9672	85.5834	0.793471	0.91724	0.871991	0.989403	0.00441501	0.00522193	0.00619195	0.00536193	107.5	92.5	67.5	100
G6AE6	G6AE6	G6AE6	G6AE6	32	32	32	32	100	100	100	100	94.0212	85.5834	94.0212	98.0392	MALE	MALE	MALE	MALE	0.260089	0.213569	0.113103	0.45783	98.0392	77.1456	49.4214	85.9852	0.859993	0.760055	0.52576	0.914736	0.00566572	0.00600601	0.00257069	0.00502513	62.5	65	295	105
G6AE6	G6AE6	G6AE6	G6AE6	32	32	32	32	100	100	100	100	94.0212	85.5834	94.0212	85.5834	MALE	MALE	MALE	MALE	0.313349	0.185688	0.0855975	0.268625	42.9926	81.9672	29.7332	87.9942	0.646505	0.827952	0.4018	0.789186	0.00682594	0.00522193	0.00194553	0.00566572	80	92.5	440	65
G6AE6	G6AE6	G6AE6	G6AE6	32	32	32	32	100	100	100	100	94.0212	85.5834	98.0392	85.5834	MALE	MALE	MALE	MALE	0.0929264	0.17014	0.547057	0.250859	22.5008	58.261	94.8248	73.9312	0.365867	0.511061	0.98264	0.69419	0.00202429	0.00478469	0.0058309	0.00529101	432.5	95	75	82.5
G6AE6	G6AE6	G6AE6	G6AE6	32	32	32	32	100	100	100	100	98.0392	85.5834	98.0392	85.5834	MALE	MALE	MALE	MALE	0.478282	0.0638981	0.509893	0.226854	101.254	50.225	100.852	89.1996	0.973592	0.482933	0.993614	0.665669	0.00536193	0.00179695	0.00543478	0.00478469	82.5	452.5	82.5	75
G6AE6	G6AE6	G6AE6	G6AE6	32	32	32	32	100	100	100	100	98.0392	85.5834	98.0392	85.5834	MALE	MALE	MALE	MALE	0.498322	0.0459422	0.516916	0.0950148	98.0392	34.5548	90.405	32.9476	0.990295	0.332258	0.913182	0.417058	0.00558659	0.00129199	0.00550964	0.00200401	80	670	82.5	420
G6AE6	G6AE6	G6AE6	G6AE6	32	32	32	32	100	100	100	100	98.0392	85.5834	98.0392	85.5834	MALE	MALE	MALE	MALE	0.471956	0.0531529	0.48361	0.0811856	91.2086	47.0106	87.9942	46.6088	0.945167	0.403524	0.846098	0.173267	0.00529101	0.00149477	0.00515464	0.00171233	92.5	552.5	90	315
G6AE6	G6AE6	G6AE6	G6AE6	32	32	32	32	100	100	100	100	98.0392	85.5834	85.5834	85.5834	MALE	MALE	MALE	MALE	0.471956	0.0425096	0.175995	0.0626734	82.369	34.9566	81.1636	37.7692	0.952243	0.392771	0.711961	0.25781	0.00529101	0.00119546	0.00550964	0.00132188	102.5	747.5	67.5	610
G6AE6	G6AE6	G6AE6	G6AE6	32	32	32	32	100	100	100	100	85.5834	84.378	85.5834	85.5834	MALE	MALE	MALE	MALE	0.280525	0.229985	0.154688	0.0995014	79.5564	83.5744	88.7978	26.117	0.869469	0.844186	0.7462	0.285432	0.00609756	0.00536193	0.00484262	0.00209864	72.5	87.5	87.5	385
G6AE6	G6AE6	G6AE6	G6AE6	32	32	32	32	100	100	100	100	85.5834	84.378	85.5834	85.5834	MALE	MALE	MALE	MALE	0.220125	0.205226	0.19779	0.0528861	85.1816	83.5744	44.198	49.4214	0.731173	0.717377	0.559468	0.264994	0.00478469	0.00478469	0.00619195	0.00111545	92.5	92.5	82.5	710
G6AE6	G6AE6	G6AE6	G6AE6	32	32	32	32	100	100	100	100	85.5834	84.378	85.5834	84.378	MALE	MALE	MALE	MALE	0.250033	0.179465	0.0558934	0.290432	80.7618	64.288	48.6178	80.7618	0.740934	0.498357	0.408553	0.758327	0.00543478	0.0041841	0.00174978	0.00543478	75	110	452.5	77.5
G6AE6	G6AE6	G6AE6	G6AE6	32	32	32	32	100	100	100	100	85.5834	84.378	85.5834	84.378	MALE	MALE	MALE	MALE	0.0931298	0.0750519	0.0342921	0.23084	38.5728	46.207	46.6088	77.9492	0.246472	0.478829	0.114659	0.669092	0.00202429	0.00174978	0.00107354	0.00431965	337.5	475	525	115
G6AE6	G6AE6	G6AE6	G6AE6	32	32	32	32	100	100	100	100	85.5834	84.378	85.5834	84.378	MALE	MALE	MALE	MALE	0.0725648	0.0838556	0.0633792	0.161205	49.4214	51.4304	40.18	31.7422	0.134847	0.398685	0.265215	0.346909	0.00157729	0.00195503	0.00198413	0.00301659	267.5	382.5	352.5	240
G6AE6	G6AE6	G6AE6	G6AE6	32	32	32	32	100	100	100	100	85.5834	84.378	85.5834	84.378	MALE	MALE	MALE	MALE	0.0672604	0.116239	0.0388839	0.0866819	38.171	43.7962	37.3674	55.8502	0.260553	0.453847	0.28967	0.280654	0.00146199	0.00271003	0.00121729	0.00162206	537.5	272.5	692.5	417.5
G6AE6	G6AE6	G6AE6	G6AE6	32	32	32	32	100	100	100	100	85.5834	84.378	84.378	84.378	MALE	MALE	MALE	MALE	0.0682583	0.139942	0.220576	0.115171	30.5368	40.5818	86.7888	45.8052	0.105664	0.483117	0.563564	0.4018	0.00148368	0.00326264	0.00515464	0.00215517	385	222.5	40	350
G6AE6	G6AE6	G6AE6	G6AE6	32	32	32	32	100	101	100	100	85.5834	107.482	84.378	84.378	MALE	MALE	MALE	MALE	0.0606141	0.837931	0.199961	0.1499	49.8232	70.315	83.9762	46.207	0.208465	1.59807	0.663843	0.466737	0.00131752	0.0126582	0.0046729	0.00280505	520	35	87.5	257.5
G6AE6	G6AE6	G6AE6	G6AE6	32	32	32	32	100	101	100	101	84.378	107.482	84.378	107.482	MALE	MALE	MALE	MALE	0.282192	0.652183	0.207224	0.415636	86.387	56.252	49.8232	86.7888	0.725941	0.712051	0.490869	0.855062	0.00515464	0.00985222	0.00484262	0.00550964	75	22.5	105	80
G6AE6	G6AE6	G6AE6	G6AE6	32	32	32	32	100	101	100	101	84.378	107.482	84.378	107.482	MALE	MALE	MALE	MALE	0.29354	0.320564	0.075537	0.213102	86.7888	100.852	53.8412	61.4754	0.761305	0.865681	0.349618	0.690735	0.00536193	0.00484262	0.00176523	0.00282486	72.5	90	412.5	265
G6AE6	G6AE6	G6AE6	G6AE6	32	32	32	32	100	101	100	101	84.378	107.482	84.378	107.482	MALE	MALE	MALE	MALE	0.261939	0.320564	0.0870635	0.297	76.342	71.1186	46.6088	69.5114	0.716826	0.73698	0.341456	0.609749	0.00478469	0.00484262	0.00203459	0.00393701	102.5	110	355	140
G6AE6	G6AE6	G6AE6	G6AE6	32	32	32	32	100	101	100	101	84.378	107.482	84.378	169.56	MALE	MALE	MALE	MALE	0.197994	0.268546	0.101522	0.286451	21.2954	65.8952	50.225	83.1726	0.346267	0.682852	0.389341	0.799737	0.00361664	0.0040568	0.00237248	0.00478469	215	150	292.5	105
G6AE6	G6AE6	G6AE6	G6AE6	32	32	32	32	100	101	100	101	84.378	107.482	84.378	169.56	MALE	MALE	MALE	MALE	0.100174	0.271297	0.141929	0.283065	28.9296	62.279	15.6702	75.9402	0.390941	0.584779	0.304276	0.807874	0.00182983	0.00409836	0.00331675	0.00472813	472.5	137.5	250	117.5
G6AE6	G6AE6	G6AE6	G6AE6	32	32	32	32	100	101	101	101	84.378	169.56	107.482	169.56	MALE	MALE	MALE	MALE	0.100174	0.156607	0.423097	0.270285	36.5638	85.5834	34.9566	77.5474	0.369331	0.750732	0.506617	0.728145	0.00182983	0.00393701	0.00706714	0.00451467	447.5	140	72.5	115
G6AE6	G6AE6	G6AE6	G6AE6	32	32	32	32	100	101	101	101	84.378	169.56	107.482	169.56	MALE	MALE	MALE	MALE	0.144447	0.185879	0.4018	0.228941	57.4574	80.7618	92.8158	66.6988	0.436938	0.724321	0.914441	0.641335	0.00263852	0.0046729	0.00671141	0.00382409	247.5	102.5	47.5	157.5
G6AE6	G6AE6	G6AE6	G6AE6	32	32	32	32	101	101	101	101	107.482	169.56	107.482	169.56	MALE	MALE	MALE	MALE	0.46624	0.168195	0.214581	0.153903	95.2266	73.1276	152.684	22.099	1.01305	0.614518	0.865065	0.345297	0.00628931	0.00422833	0.00358423	0.00257069	65	117.5	102.5	325
G6AE6	G6AE6	G6AE6	G6AE6	32	32	32	32	101	101	101	101	107.482	169.56	107.482	166.345	MALE	MALE	MALE	MALE	0.358993	0.121832	0.218497	0.626123	100.45	69.1096	74.333	44.1502	0.88114	0.375596	0.624647	0.817597	0.00484262	0.00306279	0.00364964	0.00896861	92.5	142.5	155	57.5
G6AE6	G6AE6	G6AE6	G6AE6	32	32	32	32	101	101	101	101	107.482	169.56	107.482	166.345	MALE	MALE	MALE	MALE	0.392233	0.11158	0.297113	1.09082	77.9492	21.2954	45.8052	56.252	0.767972	0.394359	0.6888	1.27845	0.00529101	0.00280505	0.00496278	0.015625	87.5	302.5	135	20
G6AE6	G6AE6	G6AE6	G6AE6	32	32	32	32	101	101	101	101	107.482	166.345	169.56	166.345	MALE	MALE	MALE	MALE	0.316804	0.674082	0.209169	0.586662	67.1006	94.8248		92.414	0.645198	1.23954		1.1698	0.0042735	0.00732601	0.00484262	0.00840336	130	60	105	40
G6AE6	G6AE6	G6AE6	G6AE6	32	32	32	32	101	101	101	101	107.482	166.345	169.56	166.345	MALE	MALE	MALE	MALE	0.30382	0.686658	0.195005	0.425687	71.9222	95.2266	84.378	83.1726	0.659837	1.28685	0.740158	0.763051	0.00409836	0.00746269	0.00451467	0.00609756	135	60	107.5	55
G6AE6	G6AE6	G6AE6	G6AE6	32	32	32	32	101	101	101	101	169.56	166.345	169.56	166.345	MALE	MALE	MALE	MALE	0.205888	0.493363	0.199508	0.379417	126.969	64.288	83.1726	59.4664	0.897306	0.868757	0.713928	0.966933	0.00451467	0.00536193	0.00461894	0.00543478	80	112.5	100	122.5
G6AE6	G6AE6	G6AE6	G6AE6	32	32	32	32	101	101	101	102	169.56	166.345	169.56	95.2266	MALE	MALE	MALE	MALE	0.208239	0.480481	0.178855	0.328181	82.7708	88.396	72.324	63.8862	0.72606	1.11894	0.583258	0.485827	0.00456621	0.00522193	0.00414079	0.00441501	105	112.5	117.5	95
G6AE6	G6AE6	G6AE6	G6AE6	32	32	32	32	101	102	101	102	169.56	95.2266	169.56	95.2266	MALE	MALE	MALE	MALE	0.232083	0.40931	0.180726	0.234859	75.1366	84.378	54.243	72.7258	0.778618	0.83131	0.534414	0.624256	0.00508906	0.0046729	0.0041841	0.00315956	100	112.5	137.5	200
G6AE6	G6AE6	G6AE6	G6AE6	32	32	32	32	101	102	101	102	169.56	95.2266	169.56	95.2266	MALE	MALE	MALE	MALE	0.167972	0.290522	0.108937	0.321093	75.5384	59.4664	29.7332	73.9312	0.634776	0.649906	0.447116	0.69419	0.00368324	0.00331675	0.00252207	0.00431965	152.5	210	330	125
G6AE6	G6AE6	G6AE6	G6AE6	32	32	32	32	101	102	101	102	169.56	95.2266	166.345	95.2266	MALE	MALE	MALE	MALE	0.171123	0.338195	0.767395	0.331844	30.9386	77.9492	96.0302	88.7978	0.483416	0.731917	1.14322	0.701959	0.00375235	0.003861	0.00706714	0.00446429	202.5	152.5	57.5	97.5
G6AE6	G6AE6	G6AE6	G6AE6	32	32	32	32	101	102	101	102	166.345	95.2266	166.345	95.2266	MALE	MALE	MALE	MALE	0.555509	0.40931	0.795505	0.311017	97.2356	79.9582	92.0122	68.7078	1.19307	0.898407	1.12898	0.565496	0.00671141	0.0046729	0.00732601	0.0041841	67.5	125	55	117.5
G6AE6	G6AE6	G6AE6	G6AE6	32	32	32	32	101	102	101	102	166.345	95.2266	166.345	96.0302	MALE	MALE	MALE	MALE	0.641634	0.378369	0.810347	0.434299	67.1006	85.9852	34.5548	85.5834	0.972472	0.73807	0.785336	0.822917	0.00775194	0.00431965	0.00746269	0.00490196	60	115	90	100
G6AE6	G6AE6	G6AE6	G6AE6	32	32	32	32	101	102	101	102	166.345	96.0302	166.345	96.0302	MALE	MALE	MALE	MALE	0.357541	0.404324	0.449633	0.439687	89.6014	82.369	94.423	81.9672	0.905065	0.900208	1.0045	0.827952	0.00431965	0.00502513	0.00414079	0.00496278	132.5	107.5	147.5	102.5
G6AE6	G6AE6	G6AE6	G6AE6	32	32	32	32	101	102	102	102	166.345	96.0302	95.2266	96.0302	MALE	MALE	MALE	MALE	0.546342	0.404324	0.441118	0.434299	77.5474	85.1816	76.7438	84.378	1.04794	0.930946	0.86229	0.852303	0.00660066	0.00502513	0.00536193	0.00490196	77.5	107.5	97.5	105
G6AE6	G6AE6	G6AE6	G6AE6	32	32	32	32	102	102	102	102	95.2266	96.0302	95.2266	96.0302	MALE	MALE	MALE	MALE	0.438837	0.380428	0.250056	0.462647	49.4214	85.5834	65.0916	83.9762	0.625587	0.910462	0.485758	0.807463	0.00558659	0.00472813	0.00303951	0.00522193	100	117.5	195	87.5
G6AE6	G6AE6	G6AE6	G6AE6	32	32	32	32	102	102	102	102	95.2266	96.0302	95.2266	91.6104	MALE	MALE	MALE	MALE	0.218808	0.399307	0.333747	0.181518	77.5474	94.8248	75.9402	72.324	0.665643	0.957826	0.696699	0.712552	0.00278552	0.00496278	0.0040568	0.00306279	242.5	102.5	137.5	225
G6AE6	G6AE6	G6AE6	G6AE6	32	32	32	32	102	102	102	102	95.2266	96.0302	95.2266	91.6104	MALE	MALE	MALE	MALE	0.328669	0.414745	0.347859	0.224491	81.5654	77.5474	87.9942	71.1186	0.715486	0.896502	0.755315	0.585338	0.0041841	0.00515464	0.00422833	0.00378788	125	107.5	120	142.5
G6AE6	G6AE6	G6AE6	G6AE6	32	32	32	32	102	102	102	102	95.2266	91.6104	95.2266	91.6104	MALE	MALE	MALE	MALE	0.358684	0.389407	0.388977	0.188744	86.387	47.0106	73.1276	63.0826	0.757781	0.706926	0.670895	0.553356	0.00456621	0.00649351	0.00472813	0.00318471	105	87.5	102.5	200
G6AE6	G6AE6	G6AE6	G6AE6	32	32	32	32	102	102	102	102	95.2266	91.6104	96.0302	91.6104	MALE	MALE	MALE	MALE	0.315469	0.402474	0.396576	0.194952	70.315	29.3314	88.7978	57.8592	0.567056	0.51914	0.814659	0.486212	0.00401606	0.00671141	0.00472813	0.00328947	125	92.5	102.5	185
G6AE6	G6AE6	G6AE6	G6AE6	32	32	32	32	102	102	102	102	96.0302	91.6104	96.0302	91.6104	MALE	MALE	MALE	MALE	0.428048	0.227154	0.411156	0.17104	87.1906	85.1816	84.7798	54.6448	0.859021	0.660322	0.760357	0.440684	0.00502513	0.00378788	0.00490196	0.002886	97.5	135	92.5	222.5
G6AE6	G6AE6	G6AE6	G6AE6	32	32	32	32	102	102	102	102	96.0302	91.6104	96.0302	92.8158	MALE	MALE	MALE	MALE	0.407567	0.211157	0.396576	0.791642	85.9852	62.279	85.5834	22.099	0.847145	0.482783	0.750732	0.391133	0.00478469	0.00352113	0.00472813	0.0119048	107.5	155	97.5	27.5
G6AE6	G6AE6	G6AE6	G6AE6	32	32	32	32	102	102	102	102	96.0302	91.6104	96.0302	92.8158	MALE	MALE	MALE	MALE	0.40275	0.197265	0.462125	0.275354	93.6194	65.8952	85.5834	59.4664	0.879055	0.590988	0.910462	0.585876	0.00472813	0.00328947	0.00550964	0.00414079	105	192.5	87.5	140
G6AE6	G6AE6	G6AE6	G6AE6	32	32	32	32	102	102	102	102	96.0302	91.6104	96.0302	92.8158	MALE	MALE	MALE	MALE	0.475875	0.192516	0.416257	0.111015	77.1456	53.4394	79.1546	77.1456	0.843121	0.49027	0.761102	0.779248	0.00558659	0.00321027	0.00496278	0.00166945	87.5	202.5	97.5	500
G6AE6	G6AE6	G6AE6	G6AE6	32	32	32	32	102	102	102	102	91.6104	92.8158	91.6104	92.8158	MALE	MALE	MALE	MALE	0.299465	0.119579	0.206774	0.318172	78.351	67.5024	72.324	81.9672	0.856295	0.681842	0.477386	0.703581	0.00536193	0.0016488	0.00389864	0.00478469	95	507.5	105	92.5
G6AE6	G6AE6	G6AE6	G6AE6	32	32	32	32	102	102	102	102	91.6104	92.8158	91.6104	92.8158	MALE	MALE	MALE	MALE	0.168477	0.35121	0.185123	0.290384	75.5384	80.36	73.5294	73.9312	0.677474	0.854894	0.644995	0.596219	0.00301659	0.00484262	0.0034904	0.00436681	220	112.5	172.5	105
G6AE6	G6AE6	G6AE6	G6AE6	32	32	32	32	102	102	102	102	91.6104	92.8158	91.6104	92.8158	MALE	MALE	MALE	MALE	0.219883	0.35121	0.177383	0.254294	67.5024	82.369	65.0916	58.261	0.619288	0.79201	0.436856	0.574	0.00393701	0.00484262	0.00334448	0.00382409	145	102.5	150	160
G6AE6	G6AE6	G6AE6	G6AE6	32	32	32	32	102	102	102	102	91.6104	92.8158	91.6104	98.8428	MALE	MALE	MALE	MALE	0.177867	0.291265	0.186752	0.725397	64.6898	67.1006	61.8772	83.1726	0.532426	0.645198	0.554952	1.2054	0.00318471	0.00401606	0.00352113	0.00671141	192.5	145	172.5	80
G6AE6	G6AE6	G6AE6	G6AE6	32	32	32	32	102	102	102	102	91.6104	98.8428	91.6104	98.8428	MALE	MALE	MALE	MALE	0.180745	0.767945	0.156453	0.737776	61.4754	91.6104	54.243	85.5834	0.458772	1.12405	0.404799	1.15653	0.00323625	0.00682594	0.00294985	0.00682594	175	65	205	72.5
G6AE6	G6AE6	G6AE6	G6AE6	32	32	32	32	102	102	102	102	91.6104	98.8428	91.6104	98.8428	MALE	MALE	MALE	MALE	0.167216	0.718875	0.171643	0.630229	55.4484	91.2086	51.0286	99.6464	0.438327	1.05443	0.502745	1.08903	0.00299401	0.00638978	0.00323625	0.0058309	207.5	70	207.5	80
G6AE6	G6AE6	G6AE6	G6AE6	32	32	32	32	102	102	102	102	92.8158	98.8428	92.8158	93.6194	MALE	MALE	MALE	MALE	0.236775	0.637416	0.355438	0.215867	58.261	111.299	15.6702	51.4304	0.693583	1.02109	0.356141	0.432188	0.00340136	0.00566572	0.00496278	0.00286533	210	67.5	157.5	230
G6AE6	G6AE6	G6AE6	G6AE6	32	32	32	32	102	102	102	102	92.8158	93.6194	92.8158	93.6194	MALE	MALE	MALE	MALE	0.175566	0.363437	0.175112	0.332616	34.5548	60.27	48.216	73.9312	0.377648	0.7175	0.452732	0.678268	0.00252207	0.00502513	0.00244499	0.00441501	305	115	302.5	117.5
G6AE6	G6AE6	G6AE6	G6AE6	32	32	32	32	102	102	102	102	92.8158	93.6194	92.8158	93.6194	MALE	MALE	MALE	MALE	0.285294	0.19338	0.338633	0.344007	80.7618	65.0916	84.7798	58.6628	0.740934	0.711384	0.743682	0.577959	0.00409836	0.0026738	0.00472813	0.00456621	135	282.5	97.5	117.5
G6AE6	G6AE6	G6AE6	G6AE6	32	32	32	32	102	102	102	102	92.8158	93.6194	92.8158	93.6194	MALE	MALE	MALE	MALE	0.345468	0.377671	0.338633	0.214331	85.5834	67.1006	79.9582	36.5638	0.750732	0.73334	0.658092	0.549832	0.00496278	0.00522193	0.00472813	0.00284495	87.5	100	90	285
G6AE6	G6AE6	G6AE6	G6AE6	32	32	32	32	102	102	102	102	92.8158	93.6194	92.8158	93.6194	MALE	MALE	MALE	MALE	0.317862	0.315825	0.299669	0.347979	73.5294	28.5278	66.297	69.5114	0.617894	0.504917	0.557118	0.684841	0.00456621	0.00436681	0.0041841	0.00461894	100	172.5	120	115
G6AE6	G6AE6	G6AE6	G6AE6	32	32	32	32	102	102	102	102	92.8158	93.6194	98.8428	93.6194	MALE	MALE	MALE	MALE	0.261208	0.200066	0.598059	0.415083	65.4934	75.9402	91.6104	71.5204	0.600857	0.730194	1.12405	0.877551	0.00375235	0.00276625	0.00660066	0.00550964	157.5	257.5	70	100
G6AE6	G6AE6	G6AE6	G6AE6	32	32	32	32	102	102	102	102	98.8428	93.6194	98.8428	98.8428	MALE	MALE	MALE	MALE	0.679143	0.358928	0.608093	0.501371	94.8248	67.1006	94.0212	87.5924	1.09624	0.798817	1.15363	0.984184	0.00628931	0.00496278	0.00671141	0.0058309	72.5	117.5	67.5	82.5
G6AE6	G6AE6	G6AE6	G6AE6	32	32	32	32	102	102	102	102	98.8428	98.8428	98.8428	98.8428	MALE	MALE	MALE	MALE	0.679143	0.617532	0.506178	0.516428	103.263	63.0212	112.102	96.8338	1.04306	1.02474	1.0054	1.00346	0.00628931	0.00671141	0.00558659	0.00600601	60	87.5	67.5	70
G6AE6	G6AE6	G6AE6	G6AE6	32	32	32	32	102	102	102	102	98.8428	98.8428	98.8428	98.8428	MALE	MALE	MALE	MALE	0.638957	0.544451	0.608093	0.480364	104.468	101.655	89.6014	88.7978	1.02924	1.11099	1.06668	0.920184	0.00591716	0.00591716	0.00671141	0.00558659	67.5	77.5	65	82.5
G6AE6	G6AE6	G6AE6	G6AE6	32	32	32	32	102	102	102	102	93.6194	98.8428	93.6194	98.8428	MALE	MALE	MALE	MALE	0.394132	0.528806	0.409095	0.473748	21.6972	90.8068	56.6538	82.369	0.4018	0.992424	0.792361	0.900208	0.00508906	0.00574713	0.00558659	0.00550964	142.5	82.5	107.5	90
G6AE6	G6AE6	G6AE6	G6AE6	32	32	32	32	102	102	102	102	93.6194	98.8428	93.6194	96.432	MALE	MALE	MALE	MALE	0.487088	0.500066	0.187045	0.0445909	22.099	87.9942	73.5294	34.153	0.374559	0.961685	0.659457	0.328394	0.00628931	0.00543478	0.00255428	0.000532907	100	92.5	280	1772.5
G6AE6	G6AE6	G6AE6	G6AE6	32	32	32	32	102	102	102	102	93.6194	96.432	93.6194	96.432	MALE	MALE	MALE	MALE	0.361902	0.0582732	0.382392	0.2009	69.9132	65.4934	65.4934	62.279	0.785542	0.4323	0.678688	0.512584	0.0046729	0.000676133	0.00522193	0.00240096	125	1327.5	95	295
G6AE6	G6AE6	G6AE6	G6AE6	32	32	32	32	102	102	102	102	93.6194	96.432	93.6194	96.432	MALE	MALE	MALE	MALE	0.357723	0.266006	0.358961	0.284608	61.4754	63.0826	35.7602	66.297	0.620964	0.578739	0.558753	0.622507	0.00461894	0.00308642	0.00490196	0.00340136	117.5	215	140	187.5
G6AE6	G6AE6	G6AE6	G6AE6	32	32	32	32	102	102	102	102	93.6194	96.432	93.6194	96.432	MALE	MALE	MALE	MALE	0.209883	0.356878	0.185858	0.400358	49.8232	72.7258	66.297	69.1096	0.479069	0.773679	0.669667	0.606225	0.00271003	0.00414079	0.00253807	0.00478469	265	147.5	295	95
G6AE6	G6AE6	G6AE6	G6AE6	32	32	32	32	102	102	102	102	93.6194	96.432	93.6194	96.432	MALE	MALE	MALE	MALE	0.37056	0.438606	0.350373	0.461018	66.6988	76.7438	70.315	84.7798	0.728949	0.86229	0.676106	0.777796	0.00478469	0.00508906	0.00478469	0.00550964	117.5	107.5	105	72.5
G6AE6	G6AE6	G6AE6	G6AE6	32	32	32	32	102	102	102	102	93.6194	96.432	98.8428	96.432	MALE	MALE	MALE	MALE	0.389181	0.509977	0.515624	0.4879	78.7528	84.378	96.8338	82.369	0.816091	0.897638	0.954028	0.755679	0.00502513	0.00591716	0.00566572	0.0058309	102.5	75	75	62.5
G6AE6	G6AE6	G6AE6	G6AE6	32	32	32	32	102	102	102	102	98.8428	93.8203	98.8428	93.8203	MALE	MALE	MALE	MALE	0.48703	0.203684	0.538507	0.254911	103.263	106.879	101.655	90.8068	0.99291	0.812767	1.02682	0.852646	0.00550964	0.00461894	0.00591716	0.00502513	77.5	85	70	92.5
G6AE6	G6AE6	G6AE6	G6AE6	32	32	32	32	102	102	102	102	98.8428	93.8203	98.8428	93.8203	MALE	MALE	MALE	MALE	0.564831	0.236448	0.563515	0.231631	97.2356	88.396	85.5834	100.048	1.00762	0.849962	0.935338	0.80684	0.00638978	0.00536193	0.00619195	0.00456621	60	82.5	70	95
G6AE6	G6AE6	G6AE6	G6AE6	32	32	32	32	102	102	102	102	98.8428	93.8203	98.8428	93.8203	MALE	MALE	MALE	MALE	0.508023	0.218846	0.50142	0.271996	87.1906	77.1456	84.378	75.1366	0.952903	0.724372	0.897638	0.740262	0.00574713	0.00496278	0.00550964	0.00536193	82.5	95	87.5	85
G6AE6	G6AE6	G6AE6	G6AE6	32	32	32	32	102	102	102	102	98.8428	93.8203	96.432	93.8203	MALE	MALE	MALE	MALE	0.48703	0.0955527	0.0565407	0.231631	83.9762	36.162	63.0826	41.7872	0.943553	0.443706	0.298263	0.512726	0.00550964	0.00216685	0.000630318	0.00456621	92.5	380	1375	137.5
G6AE6	G6AE6	G6AE6	G6AE6	32	32	32	32	102	102	102	102	96.432	97.2356	96.432	93.8203	MALE	MALE	MALE	MALE	0.0544912	0.43128	0.25888	0.0915654	23.3044	87.1906	73.5294	45.8052	0.224081	1.00798	0.44835	0.4018	0.000643501	0.00543478	0.002886	0.00180505	1450	97.5	182.5	440
G6AE6	G6AE6	G6AE6	G6AE6	32	32	32	32	102	102	102	102	96.432	97.2356	96.432	97.2356	MALE	MALE	MALE	MALE	0.239207	0.43722	0.379289	0.377786	20.4918	92.414	72.7258	81.9672	0.25939	0.957658	0.682871	0.92098	0.00282486	0.00550964	0.00422833	0.0058309	275	85	130	82.5
G6AE6	G6AE6	G6AE6	G6AE6	32	32	32	32	102	102	102	102	96.432	97.2356	96.432	97.2356	MALE	MALE	MALE	MALE	0.203312	0.43722	0.44517	0.347401	65.4934	96.0302	82.369	94.8248	0.471176	1.0216	0.755679	0.869952	0.00240096	0.00550964	0.00496278	0.00536193	277.5	87.5	92.5	77.5
G6AE6	G6AE6	G6AE6	G6AE6	32	32	32	32	102	102	102	102	96.432	97.2356	96.432	97.2356	MALE	MALE	MALE	MALE	0.274043	0.393824	0.508226	0.329721	73.9312	78.7528	87.5924	89.6014	0.551725	0.816091	0.785582	0.722592	0.00323625	0.00496278	0.00566572	0.00508906	175	105	65	72.5
G6AE6	G6AE6	G6AE6	G6AE6	32	32	32	32	102	102	102	102	96.432	95.6284	93.8203	97.2356	MALE	MALE	MALE	MALE	0.405164	0.499206	0.294614	0.302758	78.351	88.7978	89.1996	55.4484	0.672541	0.874855	0.749576	0.54629	0.00478469	0.00550964	0.0058309	0.0046729	92.5	80	52.5	112.5
G6AE6	G6AE6	G6AE6	G6AE6	32	32	32	32	102	102	102	102	96.432	95.6284	93.8203	95.6284	MALE	MALE	MALE	MALE	0.454045	0.461099	0.247678	0.406052	90.0032	81.5654	99.2446	76.342	0.77256	0.845237	0.784542	0.857775	0.00536193	0.00508906	0.00490196	0.00529101	70	100	77.5	100
G6AE6	G6AE6	G6AE6	G6AE6	32	32	32	32	102	102	102	102	96.432	95.6284	93.8203	95.6284	MALE	MALE	MALE	MALE	0.493757	0.438769	0.294614	0.358616	84.7798	83.9762	78.351	81.9672	0.743682	0.848244	0.791424	0.788146	0.0058309	0.00484262	0.0058309	0.0046729	57.5	107.5	72.5	110
G6AE6	G6AE6	G6AE6	G6AE6	32	32	32	32	102	102	102	102	93.8203	95.6284	93.8203	95.6284	MALE	MALE	MALE	MALE	0.202434	0.461099	0.303462	0.390554	95.6284	91.6104	59.0646	82.7708	0.787065	0.860192	0.747653	0.836069	0.00508906	0.00508906	0.00600601	0.00508906	75	90	87.5	97.5
G6AE6	G6AE6	G6AE6	G6AE6	32	33	32	32	102	98	102	102	93.8203	104.468	93.8203	95.6284	MALE	MALE	MALE	MALE	0.222225	0.303669	0.101765	0.441056	87.1906	66.6988	47.0106	69.1096	0.859021	0.611916	0.190712	0.847971	0.00558659	0.0035524	0.0020141	0.00574713	77.5	172.5	250	92.5
G6AE6	G6AE6	G6AE6	G6AE6	32	33	32	33	102	98	102	98	93.8203	104.468	97.2356	104.468	MALE	MALE	MALE	MALE	0.216186	0.33005	0.391566	0.284919	79.5564	82.7708	86.387	70.315	0.8036	0.759365	0.919011	0.630628	0.00543478	0.003861	0.00536193	0.00337268	85	150	92.5	185
G6AE6	G6AE6	G6AE6	G6AE6	32	33	32	33	102	98	102	98	93.8203	104.468	97.2356	104.468	MALE	MALE	MALE	MALE	0.19989	0.365312	0.386387	0.30279	33.3494	81.5654	95.6284	68.7078	0.501495	0.784283	0.877325	0.730934	0.00502513	0.0042735	0.00529101	0.00358423	132.5	130	80	185
G6AE6	G6AE6	G6AE6	G6AE6	32	33	32	33	102	98	102	98	93.8203	104.468	97.2356	104.468	MALE	MALE	MALE	MALE	0.0830443	0.346787	0.413752	0.372973	38.5728	83.9762	93.2176	76.7438	0.473286	0.788509	0.9184	0.720599	0.00208768	0.0040568	0.00566572	0.00441501	397.5	140	75	120
G6AE6	G6AE6	G6AE6	G6AE6	32	33	32	33	102	98	102	98	97.2356	113.709	97.2356	104.468	MALE	MALE	MALE	MALE	0.403394	0.237087	0.407973	0.346223	94.8248	87.5924	61.8772	75.5384	0.911777	0.768354	0.783256	0.677474	0.00529101	0.00414079	0.00558659	0.00409836	85	127.5	100	132.5
G6AE6	G6AE6	G6AE6	G6AE6	32	33	32	33	102	98	102	98	97.2356	113.709	95.6284	104.468	MALE	MALE	MALE	MALE	0.42593	0.221068	0.486086	0.361019	94.8248	85.5834	82.7708	78.7528	0.911777	0.767564	0.857728	0.722503	0.00558659	0.003861	0.00574713	0.0042735	75	147.5	77.5	125
G6AE6	G6AE6	G6AE6	G6AE6	32	33	32	33	102	98	102	98	97.2356	113.709	95.6284	113.709	MALE	MALE	MALE	MALE	0.431963	0.22766	0.3999	0.294626	84.378	76.7438	85.9852	77.1456	0.83131	0.644906	0.771168	0.724372	0.00566572	0.00397614	0.00472813	0.0040568	75	132.5	100	140
G6AE6	G6AE6	G6AE6	G6AE6	32	33	32	33	102	98	102	98	97.2356	113.709	95.6284	113.709	MALE	MALE	MALE	MALE	0.297238	0.20522	0.419746	0.277726	72.324	80.36	81.9672	83.1726	0.549992	0.754554	0.827952	0.698929	0.00389864	0.00358423	0.00496278	0.00382409	125	172.5	102.5	142.5
G6AE6	G6AE6	G6AE6	G6AE6	32	33	32	33	102	98	102	98	95.6284	113.709	95.6284	113.709	MALE	MALE	MALE	MALE	0.449829	0.139991	0.472508	0.307084	87.5924	47.8142	77.5474	78.7528	1.01263	0.537238	0.871319	0.67599	0.0058309	0.00244499	0.00558659	0.00422833	85	320	90	120
G6AE6	G6AE6	G6AE6	G6AE6	32	33	33	33	102	98	98	98	95.6284	114.915	104.468	113.709	MALE	MALE	MALE	MALE	0.392598	0.227792	0.262186	0.251299	83.1726	74.333	74.333	73.5294	0.819434	0.697962	0.53477	0.592979	0.00508906	0.00393701	0.00326264	0.00346021	95	147.5	167.5	165
G6AE6	G6AE6	G6AE6	G6AE6	32	33	33	33	102	98	98	98	95.6284	114.915	104.468	113.709	MALE	MALE	MALE	MALE	0.382857	0.249932	0.336234	0.260306	81.1636	69.1096	78.7528	62.6808	0.819834	0.698077	0.757238	0.467767	0.00496278	0.00431965	0.0041841	0.00358423	102.5	132.5	135	145
G6AE6	G6AE6	G6AE6	G6AE6	32	33	33	33	102	98	98	98	95.6284	114.915	104.468	114.915	MALE	MALE	MALE	MALE	0.373586	0.255449	0.326004	0.314594	89.6014	41.7872	79.9582		0.841328	0.564692	0.644824		0.00484262	0.00441501	0.0040568	0.0040568	100	152.5	122.5	122.5
G6AE6	G6AE6	G6AE6	G6AE6	32	33	33	33	102	98	98	98	95.6284	114.915	104.468	114.915	MALE	MALE	MALE	MALE	0.443366	0.150675	0.350917	0.334978	71.1186	95.2266	79.1546	71.9222	0.82218	0.650011	0.709907	0.645042	0.00574713	0.00260417	0.00436681	0.00431965	87.5	237.5	117.5	120
G6AE6	G6AE6	G6AE6	G6AE6	33	33	33	33	98	98	98	98	104.468	114.915	113.709	114.915	MALE	MALE	MALE	MALE	0.27702	0.191904	0.144587	0.317817	73.5294	65.8952		69.5114	0.60518	0.501104		0.57211	0.00346021	0.00331675	0.00378788	0.00409836	167.5	170	125	122.5
G6AE6	G6AE6	G6AE6	G6AE6	33	33	33	33	98	98	98	98	104.468	96.0302	113.709	114.915	MALE	MALE	MALE	MALE	0.267755	0.204456	0.153297	0.220618	81.5654	73.5294	87.9942	59.4664	0.657785	0.528988	0.644646	0.632621	0.00334448	0.00294985	0.00401606	0.00284495	175	200	112.5	257.5
G6AE6	G6AE6	G6AE6	G6AE6	33	33	33	33	98	98	98	98	104.468	96.0302	113.709	114.915	MALE	MALE	MALE	MALE	0.349601	0.224306	0.154852	0.299411	80.36	61.0736	83.5744	77.1456	0.704912	0.431616	0.673987	0.565169	0.00436681	0.00323625	0.0040568	0.003861	115	167.5	122.5	122.5
G6AE6	G6AE6	G6AE6	G6AE6	33	33	33	33	98	98	98	98	104.468	96.0302	113.709	96.0302	MALE	MALE	MALE	MALE	0.315192	0.222506	0.15028	0.188192	83.1726	67.9042	76.7438	66.297	0.644749	0.595651	0.562226	0.557118	0.00393701	0.00321027	0.00393701	0.00269179	125	197.5	117.5	252.5
G6AE6	G6AE6	G6AE6	G6AE6	33	33	33	33	98	98	98	98	104.468	96.0302	113.709	96.0302	MALE	MALE	MALE	MALE	0.374106	0.255287	0.140593	0.226256	77.5474	69.5114	77.9492	68.7078	0.728145	0.668379	0.669092	0.645144	0.0046729	0.00368324	0.00368324	0.00323625	107.5	167.5	155	202.5
G6AE6	G6AE6	G6AE6	G6AE6	33	33	33	33	98	98	98	98	113.709	96.0302	113.709	96.0302	MALE	MALE	MALE	MALE	0.255793	0.23575	0.135599	0.219164	91.6104	63.8862	18.4828	60.27	0.710158	0.505029	0.3772	0.658689	0.00371747	0.00340136	0.0035524	0.0031348	140	167.5	232.5	227.5
G6AE6	G6AE6	G6AE6	G6AE6	33	33	33	33	98	98	98	98	113.709	98.0392	114.915	96.0302	MALE	MALE	MALE	MALE	0.268258	0.250144	0.258997	0.228102	87.1906	56.252		67.5024	0.650676	0.540885		0.619288	0.00389864	0.0035524	0.00441501	0.00326264	122.5	177.5	105	197.5
G6AE6	G6AE6	G6AE6	G6AE6	33	33	33	33	98	98	98	98	113.709	98.0392	114.915	96.0302	MALE	MALE	MALE	MALE	0.28492	0.261767	0.235594	0.2599	85.5834	28.5278	76.7438	59.8682	0.663437	0.445747	0.631636	0.654297	0.00414079	0.00371747	0.00401606	0.00371747	112.5	205	127.5	177.5
G6AE6	G6AE6	G6AE6	G6AE6	33	33	33	33	98	98	98	98	113.709	98.0392	114.915	98.0392	MALE	MALE	MALE	MALE	0.240168	0.108918	0.245451	0.248866	76.7438	58.6628	75.1366	60.27	0.562226	0.550824	0.582454	0.506471	0.0034904	0.00154679	0.0041841	0.00346021	150	540	110	170
G6AE6	G6AE6	G6AE6	G6AE6	33	33	33	33	98	98	98	98	113.709	98.0392	114.915	98.0392	MALE	MALE	MALE	MALE	0.28492	0.174296	0.277365	0.227242	60.6718	67.9042	31.3404	63.0826	0.532209	0.609006	0.409678	0.453832	0.00414079	0.00247525	0.00472813	0.00315956	127.5	292.5	135	177.5
G6AE6	G6AE6	G6AE6	G6AE6	33	33	33	33	98	98	98	98	114.915	98.0392	114.915	98.0392	MALE	MALE	MALE	MALE	0.0835066	0.224253	0.473087	0.122629		71.5204	22.099	31.3404		0.65615	0.320275	0.489694	0.00401606	0.00318471	0.00806452	0.00170503	117.5	205	55	522.5
G6AE6	G6AE6	G6AE6	G6AE6	33	33	33	33	98	98	98	98	114.915	98.0392	114.915	98.0392	MALE	MALE	MALE	MALE	0.091802	0.219022	0.233252	0.221982	74.333	67.5024	76.7438	34.9566	0.697962	0.544374	0.658745	0.382039	0.00441501	0.00311042	0.00397614	0.00308642	120	197.5	135	232.5
G6AE6	G6AE6	G6AE6	G6AE6	33	33	33	33	98	98	98	98	114.915	94.423	114.915	98.0392	MALE	MALE	MALE	MALE	0.0907998	0.361939	0.240421	0.181393	68.7078	45.0016	45.8052	87.9942	0.660652	0.412859	0.487289	0.478229	0.00436681	0.00529101	0.00409836	0.00252207	125	80	150	212.5
G6AE6	G6AE6	G6AE6	G6AE6	33	33	33	33	98	98	98	98	114.915	94.423	96.0302	98.0392	MALE	MALE	MALE	MALE	0.137249	0.189229	0.207032	0.238548	32.144	74.7348	71.5204	67.1006	1.33933	0.590789	0.496669	0.482738	0.00660066	0.00276625	0.00290698	0.00331675	127.5	235	200	162.5
G6AE6	G6AE6	G6AE6	G6AE6	33	33	33	33	98	98	98	98	114.915	94.423	96.0302	94.423	MALE	MALE	MALE	MALE	0.0888596	0.226887	0.240199	0.482023	74.333	70.315	68.306	17.2774	0.554724	0.524739	0.519437	0.371557	0.0042735	0.00331675	0.00337268	0.00682594	100	167.5	165	100
G6AE6	G6AE6	G6AE6	G6AE6	33	33	33	33	98	98	98	98	114.915	94.423	96.0302	94.423	MALE	MALE	MALE	MALE	0.0983128	0.23467	0.201184	0.168535	66.297	71.5204	68.7078	65.0916	0.637471	0.576777	0.461126	0.535733	0.00472813	0.00343053	0.00282486	0.00238663	107.5	167.5	205	297.5
G6AE6	G6AE6	G6AE6	G6AE6	33	33	33	33	98	98	98	98	114.915	94.423	96.0302	94.423	MALE	MALE	MALE	MALE	0.0632011	0.230713	0.277657	0.250857	28.9296	72.7258	66.297	67.9042	0.5904	0.652249	0.557118	0.570624	0.00303951	0.00337268	0.00389864	0.0035524	280	185	137.5	162.5
G6AE6	G6AE6	G6AE6	G6AE6	33	33	33	33	98	98	98	98	114.915	94.423	96.0302	94.423	MALE	MALE	MALE	MALE	0.0613367	0.247401	0.228633	0.230396	12.4558	63.4844	69.5114	68.7078	0.267867	0.657869	0.444162	0.589767	0.00294985	0.00361664	0.00321027	0.00326264	292.5	180	155	190
G6AE6	G6AE6	G6AE6	G6AE6	33	33	33	33	98	98	98	98	96.0302	96.432	98.0392	94.423	MALE	MALE	MALE	MALE	0.20117	0.228553	0.244376	0.234217	73.5294	69.1096	65.0916	65.8952	0.469836	0.634033	0.535733	0.565624	0.00269179	0.00331675	0.0034904	0.00331675	215	192.5	165	185
G6AE6	G6AE6	G6AE6	G6AE6	33	33	33	33	98	98	98	98	96.0302	96.432	98.0392	94.423	MALE	MALE	MALE	MALE	0.234278	0.271294	0.203528	0.242252	73.5294	73.1276	69.5114	64.288	0.501907	0.686644	0.388332	0.589798	0.0031348	0.00393701	0.00290698	0.00343053	172.5	147.5	165	182.5
G6AE6	G6AE6	G6AE6	G6AE6	33	33	33	33	98	98	98	98	96.0302	96.432	98.0392	96.432	MALE	MALE	MALE	MALE	0.234278	0.256166	0.278384	0.228986	66.6988	70.315	32.144	69.9132	0.47137	0.590882	0.324687	0.502973	0.0031348	0.00371747	0.00397614	0.00328947	177.5	150	152.5	165
G6AE6	G6AE6	G6AE6	G6AE6	33	33	33	33	98	98	98	98	96.0302	96.432	98.0392	96.432	MALE	MALE	MALE	MALE	0.265488	0.240519	0.111754	0.251761	66.297	70.315	60.27	75.9402	0.637471	0.660235	0.433597	0.651847	0.0035524	0.0034904	0.00159617	0.00361664	177.5	180	487.5	160
G6AE6	G6AE6	G6AE6	G6AE6	33	33	33	33	98	98	98	98	96.0302	96.432	98.0392	96.432	MALE	MALE	MALE	MALE	0.258598	0.211053	0.1777	0.266202	73.1276	65.8952	66.6988	71.5204	0.526098	0.604543	0.447643	0.601012	0.00346021	0.00306279	0.00253807	0.00382409	150	217.5	245	142.5
G6AE6	G6AE6	G6AE6	G6AE6	33	33	33	33	98	98	98	98	98.0392	99.6464	98.0392	96.432	MALE	MALE	MALE	MALE	0.277918	0.174895	0.226581	0.247289	63.4844	55.8502	70.315	69.1096	0.501853	0.550248	0.515128	0.664515	0.00361664	0.00253807	0.00323625	0.0035524	150	292.5	172.5	177.5
G6AE6	G6AE6	G6AE6	G6AE6	33	33	33	33	98	98	98	98	98.0392	99.6464	98.0392	96.432	MALE	MALE	MALE	MALE	0.239018	0.234383	0.224763	0.230885	68.306	69.1096	65.0916	59.8682	0.482728	0.648916	0.468285	0.536935	0.00311042	0.00340136	0.00321027	0.00331675	180	187.5	172.5	190
G6AE6	G6AE6	G6AE6	G6AE6	33	33	33	33	98	98	98	98	98.0392	99.6464	94.423	96.432	MALE	MALE	MALE	MALE	0.215552	0.273991	0.0843585	0.219943	24.108	69.9132	68.7078	63.8862	0.446444	0.6888	0.32486	0.485827	0.00280505	0.00397614	0.00121359	0.00315956	302.5	150	612.5	185
G6AE6	G6AE6	G6AE6	G6AE6	33	33	33	33	98	98	98	98	98.0392	99.6464	94.423	99.6464	MALE	MALE	MALE	MALE	0.123148	0.271294	0.217904	0.193398	73.9312	75.1366	70.7168	65.0916	0.333775	0.740262	0.482709	0.524932	0.00160256	0.00393701	0.0031348	0.00276625	402.5	152.5	172.5	237.5
G6AE6	G6AE6	G6AE6	G6AE6	33	33	33	33	98	98	98	98	98.0392	99.6464	94.423	99.6464	MALE	MALE	MALE	MALE	0.240891	0.276742	0.236433	0.262338	71.5204	75.5384	71.5204	63.8862	0.505445	0.709281	0.480003	0.645315	0.0031348	0.00401606	0.00340136	0.00375235	177.5	142.5	145	167.5
G6AE6	G6AE6	G6AE6	G6AE6	33	33	33	33	98	98	98	98	98.0392	99.6464	94.423	99.6464	MALE	MALE	MALE	MALE	0.242794	0.242636	0.23444	0.269935	73.1276	64.288	71.5204	75.9402	0.490789	0.649374	0.496669	0.600318	0.00315956	0.00352113	0.00337268	0.003861	167.5	185	152.5	132.5
G6AE6	G6AE6	G6AE6	G6AE6	33	33	33	33	98	98	98	98	94.423	96.0302	94.423	99.6464	MALE	MALE	MALE	MALE	0.181037	0.215716	0.244758	0.272566	20.4918	73.1276	67.9042	73.9312	0.251433	0.627705	0.506748	0.66306	0.00282486	0.00294985	0.00352113	0.00389864	272.5	222.5	150	145
G6AE6	G6AE6	G6AE6	G6AE6	33	33	33	33	98	98	98	98	94.423	96.0302	94.423	99.6464	MALE	MALE	MALE	MALE	0.158631	0.250867	0.244758	0.277985	67.5024	59.4664	65.0916	65.8952	0.477049	0.585876	0.524932	0.520911	0.00247525	0.00343053	0.00352113	0.00397614	262.5	190	160	125
G6AE6	G6AE6	G6AE6	G6AE6	33	33	33	33	98	98	98	98	94.423	96.0302	96.432	96.0302	MALE	MALE	MALE	MALE	0.214338	0.255245	0.193856	0.227892	75.1366	71.5204	70.7168	64.288	0.582454	0.627372	0.548192	0.518452	0.00334448	0.0034904	0.00280505	0.00340136	170	172.5	227.5	170
G6AE6	G6AE6	G6AE6	G6AE6	33	33	33	33	98	98	98	98	94.423	96.0302	96.432	96.0302	MALE	MALE	MALE	MALE	0.214338	0.23289	0.221861	0.22597	73.9312	58.6628	74.7348	61.8772	0.584436	0.514586	0.518992	0.625022	0.00334448	0.00318471	0.00321027	0.00337268	172.5	200	167.5	197.5
G6AE6	G6AE6	G6AE6	G6AE6	33	33	33	33	98	98	98	98	94.423	96.0302	96.432	96.0302	MALE	MALE	MALE	MALE	0.219853	0.227458	0.264281	0.240144	71.1186	69.1096	75.1366	62.6808	0.585338	0.634033	0.540551	0.6027	0.00343053	0.00311042	0.00382409	0.00358423	170	212.5	122.5	175
G6AE6	G6AE6	G6AE6	G6AE6	33	33	33	33	98	98	98	98	94.423	100.45	96.432	96.0302	MALE	MALE	MALE	MALE	0.216145	0.189119	0.252225	0.194768	67.5024	67.9042	69.9132	58.6628	0.523274	0.42707	0.477223	0.538191	0.00337268	0.00308642	0.00364964	0.00290698	167.5	165	127.5	235
G6AE6	G6AE6	G6AE6	G6AE6	33	33	33	33	98	98	98	98	94.423	100.45	96.432	100.45	MALE	MALE	MALE	MALE	0.249852	0.215755	0.269433	0.17206	65.8952	69.1096	62.6808	73.5294	0.604543	0.648916	0.50549	0.559159	0.00389864	0.00352113	0.00389864	0.00326264	147.5	177.5	132.5	175
G6AE6	G6AE6	G6AE6	G6AE6	33	33	33	33	98	98	98	98	96.432	100.45	96.432	100.45	MALE	MALE	MALE	MALE	0.246636	0.234319	0.21006	0.154425	67.9042	67.9042	67.9042	67.9042	0.570624	0.558882	0.479888	0.669007	0.00337268	0.00382409	0.00303951	0.00292826	177.5	140	187.5	240
G6AE6	G6AE6	G6AE6	G6AE6	33	33	33	33	98	98	98	98	96.432	100.45	99.6464	100.45	MALE	MALE	MALE	MALE	0.264476	0.221608	0.176132	0.207623	71.9222	54.6448	61.4754	69.5114	0.69156	0.513097	0.380653	0.637719	0.00361664	0.00361664	0.00249066	0.00393701	172.5	170	240	145
G6AE6	G6AE6	G6AE6	G6AE6	33	33	33	33	98	99	98	98	96.432	100.048	99.6464	100.45	MALE	MALE	MALE	MALE	0.276998	0.510828	0.270428	0.192468	77.5474	103.263	61.4754	58.261	0.625382	1.07008	0.59111	0.636732	0.00378788	0.00550964	0.00382409	0.00364964	140	85	157.5	182.5
G6AE6	G6AE6	G6AE6	G6AE6	33	33	33	33	98	99	98	98	96.432	100.048	99.6464	100.45	MALE	MALE	MALE	MALE	0.264476	0.510828	0.244695	0.100164	68.306	92.414	79.5564	45.0016	0.641371	1.00999	0.562236	0.34885	0.00361664	0.00550964	0.00346021	0.00189934	170	90	147.5	397.5
G6AE6	G6AE6	G6AE6	G6AE6	33	33	33	33	98	99	98	99	96.432	100.048	99.6464	100.048	MALE	MALE	MALE	MALE	0.248733	0.443614	0.278413	0.518298	61.4754	87.9942	77.1456	84.7798	0.467494	0.826237	0.586659	0.980113	0.00340136	0.00478469	0.00393701	0.00591716	162.5	102.5	122.5	82.5
G6AE6	G6AE6	G6AE6	G6AE6	33	33	33	33	98	99	98	99	96.432	100.048	99.6464	100.048	MALE	MALE	MALE	MALE	0.214136	0.423358	0.305472	0.457402	68.306	92.414	69.9132	102.861	0.450865	0.810649	0.613274	0.989046	0.00292826	0.00456621	0.00431965	0.00522193	190	105	117.5	87.5
G6AE6	G6AE6	G6AE6	G6AE6	33	33	33	33	98	99	98	99	99.6464	96.8338	99.6464	100.048	MALE	MALE	MALE	MALE	0.195831	0.493182	0.240533	0.451507	71.9222	81.1636	67.5024	92.414	0.591952	1.13516	0.494523	0.867737	0.00265604	0.00694444	0.00340136	0.00515464	255	72.5	157.5	87.5
G6AE6	G6AE6	G6AE6	G6AE6	33	33	33	33	98	99	98	99	99.6464	96.8338	96.0302	100.048	MALE	MALE	MALE	MALE	0.264266	0.380794	0.216308	0.429375	67.5024	82.7708	65.0916	81.9672	0.592126	0.815476	0.514558	0.895816	0.00358423	0.00536193	0.00294985	0.00490196	165	85	212.5	112.5
G6AE6	G6AE6	G6AE6	G6AE6	33	33	33	33	98	99	98	99	99.6464	96.8338	96.0302	96.8338	MALE	MALE	MALE	MALE	0.279281	0.297147	0.251556	0.458464	82.7708	73.5294	59.8682	71.9222	0.606379	0.644995	0.503094	0.910408	0.00378788	0.0041841	0.00343053	0.00732601	127.5	125	172.5	57.5
G6AE6	G6AE6	G6AE6	G6AE6	33	33	33	33	98	99	98	99	99.6464	96.8338	96.0302	96.8338	MALE	MALE	MALE	MALE	0.308495	0.146732	0.272597	0.381588	72.7258	69.1096	66.297	92.8158	0.682871	0.580753	0.594592	0.87151	0.0041841	0.00206612	0.00371747	0.00609756	132.5	365	157.5	57.5
G6AE6	G6AE6	G6AE6	G6AE6	33	33	33	33	98	99	98	99	99.6464	96.8338	96.0302	96.8338	MALE	MALE	MALE	MALE	0.290277	0.266485	0.231686	0.292432	70.315	69.1096	66.297	71.9222	0.55585	0.619817	0.423623	0.745308	0.00393701	0.00375235	0.00315956	0.0046729	127.5	155	160	117.5
G6AE6	G6AE6	G6AE6	G6AE6	33	33	33	33	98	99	98	99	96.0302	96.0302	96.0302	96.8338	MALE	MALE	MALE	MALE	0.214227	0.333242	0.222883	0.299428	59.4664	104.87	72.324	32.144	0.427816	0.680973	0.549992	0.56892	0.00331675	0.00431965	0.00303951	0.00478469	162.5	77.5	197.5	152.5
G6AE6	G6AE6	G6AE6	G6AE6	33	33	33	33	98	99	98	99	96.0302	96.0302	100.45	96.8338	MALE	MALE	MALE	MALE	0.231503	0.0226799	0.254691	0.26461	69.9132	43.7962	48.6178	27.3224	0.563816	0.591841	0.478993	0.5576	0.00358423	0.000293988	0.0040568	0.00422833	155	3327.5	145	187.5
G6AE6	G6AE6	G6AE6	G6AE6	33	33	33	33	98	99	98	99	96.0302	96.0302	100.45	96.8338	MALE	MALE	MALE	MALE	0.244657	0.295012	0.17861	0.207563	69.1096	67.5024	71.5204	77.1456	0.593215	0.665048	0.627372	0.622142	0.00378788	0.00382409	0.00284495	0.00331675	147.5	160	237.5	177.5
G6AE6	G6AE6	G6AE6	G6AE6	33	33	33	33	98	99	98	99	96.0302	96.0302	100.45	96.8338	MALE	MALE	MALE	MALE	0.177443	0.297859	0.274154	0.209299	69.5114	87.5924	57.8592	56.252	0.466519	0.679011	0.584436	0.568202	0.00274725	0.003861	0.00436681	0.00334448	215	130	130	200
G6AE6	G6AE6	G6AE6	G6AE6	33	33	33	33	98	99	98	99	96.0302	96.0302	100.45	96.0302	MALE	MALE	MALE	MALE	0.262026	0.260188	0.219132	0.468965	61.8772	78.351	61.8772	54.6448	0.676254	0.525846	0.554952	0.513097	0.0040568	0.00337268	0.0034904	0.00591716	155	147.5	175	62.5
G6AE6	G6AE6	G6AE6	G6AE6	33	33	33	33	98	99	99	99	100.45	101.655	100.048	96.0302	MALE	MALE	MALE	MALE	0.131358	0.734348	0.479432	0.022732	73.9312	85.1816	107.281	75.1366	0.57311	1.07825	0.984226	0.495951	0.00334448	0.00682594	0.00522193	0.000286821	170	67.5	82.5	3335
G6AE6	G6AE6	G6AE6	G6AE6	33	33	33	33	98	99	99	99	100.45	101.655	100.048	96.0302	MALE	MALE	MALE	MALE	0.113351	0.601016	0.479432	0.279067	68.7078	79.5564	98.0392	79.1546	0.630347	1.07509	0.899442	0.625728	0.002886	0.00558659	0.00522193	0.00352113	237.5	105	82.5	157.5
G6AE6	G6AE6	G6AE6	G6AE6	33	33	33	33	98	99	99	99	100.45	101.655	100.048	96.0302	MALE	MALE	MALE	MALE	0.159334	0.540613	0.444607	0.300209	73.9312	98.8428	85.9852	75.1366	0.634603	0.928101	0.771168	0.504272	0.0040568	0.00502513	0.00484262	0.00378788	130	92.5	95	115
G6AE6	G6AE6	G6AE6	G6AE6	33	33	33	33	98	99	99	99	100.45	101.655	100.048	101.655	MALE	MALE	MALE	MALE	0.142047	0.502719	0.424071	0.764642	57.8592	100.852	83.1726	71.0062	0.543279	0.925246	0.745943	1.02908	0.00361664	0.0046729	0.00461894	0.00760456	170	105	105	62.5
G6AE6	G6AE6	G6AE6	G6AE6	33	33	33	33	98	99	99	99	100.45	98.0392	96.8338	101.655	MALE	MALE	MALE	MALE	0.138296	0.312334	0.385754	0.532013	22.5008	83.5744	91.2086	96.432	0.4592	0.866056	0.970304	0.974061	0.00352113	0.00397614	0.00638978	0.00529101	235	155	62.5	90
G6AE6	G6AE6	G6AE6	G6AE6	33	33	33	33	99	99	99	99	100.048	98.0392	96.8338	101.655	MALE	MALE	MALE	MALE	0.529175	0.375846	0.342042	0.475416	105.272	81.9672	77.9492	94.8248	1.01223	0.947598	0.71513	0.934234	0.00515464	0.00478469	0.00566572	0.00472813	90	122.5	67.5	110
G6AE6	G6AE6	G6AE6	G6AE6	33	33	33	33	99	99	99	99	100.048	98.0392	96.8338	98.0392	MALE	MALE	MALE	MALE	0.581642	0.346808	0.285439	0.372445	97.6374	90.8068	66.6988	77.9492	1.0387	0.814411	0.62628	0.71513	0.00566572	0.00441501	0.00472813	0.00456621	82.5	115	105	110
G6AE6	G6AE6	G6AE6	G6AE6	33	33	33	33	99	99	99	99	100.048	98.0392	96.8338	98.0392	MALE	MALE	MALE	MALE	0.543174	0.380397	0.12038	0.409876	91.2086	77.5474	73.1276	79.1546	0.970304	0.871319	0.516803	0.865078	0.00529101	0.00484262	0.00199402	0.00502513	95	117.5	360	107.5
G6AE6	G6AE6	G6AE6	G6AE6	33	33	33	33	99	99	99	99	100.048	96.8338	96.8338	98.0392	MALE	MALE	MALE	MALE	0.420737	0.420203	0.275664	0.368241	97.2356	89.1996	40.9836	79.5564	0.768661	0.901006	0.535733	0.8036	0.00409836	0.00508906	0.00456621	0.00451467	117.5	97.5	142.5	122.5
G6AE6	G6AE6	G6AE6	G6AE6	33	33	33	33	99	99	99	99	96.8338	96.8338	96.0302	98.0392	MALE	MALE	MALE	MALE	0.457755	0.442734	0.430981	0.390265	81.9672	77.1456	92.414	74.333	0.92098	0.866804	0.828825	0.77029	0.00671141	0.00536193	0.00558659	0.00478469	60	97.5	67.5	112.5
G6AE6	G6AE6	G6AE6	G6AE6	33	33	33	33	99	99	99	99	96.8338	96.8338	96.0302	96.8338	MALE	MALE	MALE	MALE	0.450202	0.377032	0.0226134	0.436629	86.387	86.387	44.5998	85.1816	0.895202	0.872596	0.439407	0.882711	0.00660066	0.00456621	0.000293126	0.00502513	55	120	3310	102.5
G6AE6	G6AE6	G6AE6	G6AE6	33	33	33	33	99	99	99	99	96.8338	96.8338	96.0302	96.8338	MALE	MALE	MALE	MALE	0.322485	0.399854	0.258012	0.431212	82.369	86.7888	80.36	75.9402	0.738735	0.876655	0.530429	0.786945	0.00472813	0.00484262	0.00334448	0.00496278	100	107.5	147.5	105
G6AE6	G6AE6	G6AE6	G6AE6	33	33	33	33	99	99	99	99	96.8338	96.8338	96.0302	96.8338	MALE	MALE	MALE	MALE	0.315037	0.390401	0.303723	0.406025	21.6972	83.5744	79.5564	80.7618	0.384021	0.784736	0.593704	0.859168	0.00461894	0.00472813	0.00393701	0.0046729	160	105	120	120
G6AE6	G6AE6	G6AE6	G6AE6	33	33	33	33	99	99	99	99	96.8338	98.0392	96.0302	96.8338	MALE	MALE	MALE	MALE	0.288396	0.409423	0.26465	0.436629	20.8936	93.6194	72.7258	79.9582	0.386919	0.945651	0.480038	0.898407	0.00422833	0.00446429	0.00343053	0.00502513	182.5	125	140	110
G6AE6	G6AE6	G6AE6	G6AE6	33	33	33	33	99	99	99	99	96.8338	98.0392	101.655	98.0392	MALE	MALE	MALE	MALE	0.248925	0.44412	0.805128	0.372228	68.306	90.0032	78.7528	80.7618	0.746514	0.886731	1.28053	0.907436	0.00364964	0.00484262	0.00760456	0.0046729	182.5	105	70	125
G6AE6	G6AE6	G6AE6	G6AE6	33	33	33	33	99	99	99	99	96.8338	98.0392	101.655	98.0392	MALE	MALE	MALE	MALE	0.215499	0.409423	0.500588	0.395319	63.8862	89.6014	96.8338	84.378	0.505029	0.822031	0.909238	0.897638	0.00315956	0.00446429	0.00472813	0.00496278	190	115	105	107.5
G6AE6	G6AE6	G6AE6	G6AE6	33	33	33	33	99	99	99	99	96.0302	98.0392	101.655	98.0392	MALE	MALE	MALE	MALE	0.368144	0.364655	0.512708	0.376628		92.414	94.8248	81.1636		0.745274	0.813947	0.841074	0.00515464	0.00397614	0.00484262	0.00472813	80	127.5	90	115
G6AE6	G6AE6	G6AE6	G6AE6	33	33	33	33	99	99	99	99	96.0302	84.378	101.655	98.0392	MALE	MALE	MALE	MALE	0.463766	0.193679	0.500588	0.333292	62.6808	78.7528	97.6374	85.5834	0.485898	0.757238	0.856468	0.767564	0.00649351	0.00422833	0.00472813	0.0041841	25	132.5	97.5	127.5
G6AE6	G6AE6	G6AE6	G6AE6	33	33	33	33	99	99	99	99	96.0302	84.378	98.0392	98.0392	MALE	MALE	MALE	MALE	0.0205436	0.204488	0.280097	0.329842	71.1186	83.5744	77.9492	71.5204	0.597635	0.766738	0.829247	0.687696	0.000287646	0.00446429	0.00361664	0.00414079	3357.5	115	182.5	137.5
G6AE6	G6AE6	G6AE6	G6AE6	33	33	33	33	99	99	99	99	96.0302	84.378	98.0392	84.378	MALE	MALE	MALE	MALE	0.240877	0.17028	0.353639	0.242121	85.1816	67.1006	81.5654	83.9762	0.60199	0.563871	0.845237	0.475786	0.00337268	0.00371747	0.00456621	0.00431965	155	150	122.5	55
G6AE6	G6AE6	G6AE6	G6AE6	33	33	33	33	99	99	99	99	96.0302	84.378	98.0392	84.378	MALE	MALE	MALE	MALE	0.263057	0.216573	0.375046	0.247466	79.9582	39.7782	77.9492	77.5474	0.510915	0.556338	0.787366	0.651659	0.00368324	0.00472813	0.00484262	0.00441501	115	140	107.5	107.5
G6AE6	G6AE6	G6AE6	G6AE6	33	33	33	33	99	99	99	99	96.0302	84.378	98.0392	84.378	MALE	MALE	MALE	MALE	0.236882	0.0457366	0.361902	0.229718	67.5024	25.3134	79.5564	75.1366	0.431325	0.342073	0.783807	0.521782	0.00331675	0.000998502	0.0046729	0.00409836	145	927.5	112.5	100
G6AE6	G6AE6	G6AE6	G6AE6	33	33	33	33	99	99	99	99	101.655	84.378	98.0392	84.378	MALE	MALE	MALE	MALE	0.502731	0.148237	0.399211	0.202716		34.153	74.7348	65.0916		0.446444	0.863986	0.504586	0.00478469	0.00323625	0.00515464	0.00361664	85	232.5	107.5	147.5
G6AE6	G6AE6	G6AE6	G6AE6	33	33	33	33	99	99	99	99	101.655	84.378	96.8338	84.378	MALE	MALE	MALE	MALE	0.942338	0.0530153	0.414227	0.0444321	62.6808	40.18	90.0032	47.8142	0.908417	0.405859	0.886731	0.350287	0.00896861	0.00115741	0.00515464	0.000792707	42.5	765	92.5	1125
G6AE6	G6AE6	G6AE6	G6AE6	33	33	33	33	99	99	99	99	101.655	84.378	96.8338	84.378	MALE	MALE	MALE	MALE	0.508817	0.0956267	0.408957	0.085705	103.263	31.3404	80.7618	26.9206	0.926122	0.3731	0.795683	0.271925	0.00484262	0.00208768	0.00508906	0.00152905	95	395	95	555
G6AE6	G6AE6	G6AE6	G6AE6	33	33	33	33	99	99	99	99	101.655	101.655	96.8338	84.378	MALE	MALE	MALE	MALE	0.479775	0.295733	0.375514	0.0963905	98.8428	93.2176	81.5654	55.4484	0.830612	0.896323	0.845237	0.275178	0.00456621	0.00328947	0.0046729	0.00171969	100	200	117.5	380
G6AE6	G6AE6	G6AE6	G6AE6	33	33	33	33	99	99	99	99	98.0392	101.655	96.8338	101.655	MALE	MALE	MALE	MALE	0.32231	0.388349	0.384498	0.284121	75.9402	80.7618	81.9672	62.6808	0.713054	0.776556	0.807559	0.908417	0.00393701	0.00431965	0.00478469	0.00323625	147.5	127.5	107.5	240
G6AE6	G6AE6	G6AE6	G6AE6	33	33	33	33	99	99	99	99	98.0392	101.655	96.8338	101.655	MALE	MALE	MALE	MALE	0.378137	0.405881	0.408957	0.375185	82.7708	90.0032	73.1276	85.1816	0.759365	0.932676	0.738663	0.763961	0.00461894	0.00451467	0.00508906	0.0042735	107.5	125	97.5	122.5
G6AE6	G6AE6	G6AE6	G6AE6	33	33	33	33	99	99	99	99	98.0392	101.655	98.0392	101.655	MALE	MALE	MALE	MALE	0.378137	0.415255	0.432591	0.379237	90.8068	90.8068	82.7708	78.7528	0.814411	0.852646	0.88054	0.837796	0.00461894	0.00461894	0.00502513	0.00431965	105	110	105	137.5
G6AE6		G6AE6	G6AE6	33		33	33	99		99	99	98.0392		98.0392	101.655	MALE		MALE	MALE	0.396449		0.397624	0.435699	81.1636		90.8068	82.7708	0.583911		0.732313	0.857728	0.00484262		0.00461894	0.00496278	67.5		92.5	105
G6AE6		G6AE6	G6AE6	33		33	33	99		99	99	98.0392		98.0392	101.655	MALE		MALE	MALE	0.391707		0.380069	0.425149	80.36		86.387	83.1726	0.791724		0.711004	0.90899	0.00478469		0.00441501	0.00484262	107.5		105	115
G6AE6		G6AE6		33		33		99		99		96.8338		98.0392		MALE		MALE		0.485415		0.388649		81.1636		76.7438		0.966233		0.720599		0.00558659		0.00451467		95		115
G6AE6		G6AE6		33		33		99		99		96.8338		84.378		MALE		MALE		0.383617		0.165647		89.1996		77.9492		0.749576		0.59277		0.00441501		0.00422833		107.5		105
G6AE6		G6AE6		33		33		99		99		96.8338		84.378		MALE		MALE		0.410824		0.180949		84.7798		80.7618		0.777796		0.678671		0.00472813		0.00461894		102.5		97.5
G6AE6		G6AE6		33		33		99		99		96.8338		84.378		MALE		MALE		0.436629		0.141684		84.378		70.7168		0.83131		0.466778		0.00502513		0.00361664		97.5		125
G6AE6		G6AE6		33		33		99		99		98.0392		84.378		MALE		MALE		0.403926		0.196862		71.5204		30.135		0.905322		0.436739		0.00529101		0.00502513		110		130
G6AE6		G6AE6		33		33		99		99		98.0392		84.378		MALE		MALE		0.352619		0.0398125		92.8158		35.3584		0.87151		0.15785		0.00461894		0.00101626		110		760
G6AE6		G6AE6		33		33		99		99		98.0392		84.378		MALE		MALE		0.360955		0.100065		87.5924		9.6432		0.842235		0.232366		0.00472813		0.00255428		107.5		350
G6AE6		G6AE6		33		33		99		99		98.0392		84.378		MALE		MALE		0.316116		0.0499688		87.1906		58.6628		0.748417		0.250696		0.00414079		0.00127551		125		550
G6AE6		G6AE6		33		33		99		99		98.0392		84.378		MALE		MALE		0.340812		0.0907891		69.5114		30.135		0.759687		0.25867		0.00446429		0.0023175		132.5		315
G6AE6		G6AE6		33		33		99		99		84.378		101.655		MALE		MALE		0.235049		0.271824		81.1636		91.2086		0.641609		0.818014		0.00441501		0.00311042		100		210
G6AE6		G6AE6		33		33		99		99		84.378		101.655		MALE		MALE		0.222755		0.381622		86.7888		78.351		0.659991		0.73569		0.0041841		0.00436681		107.5		122.5
G6AE6		G6AE6		33		33		99		99		84.378		101.655		MALE		MALE		0.243098		0.36952		73.1276		91.2086		0.578084		0.800075		0.00456621		0.00422833		92.5		122.5
G6AE6		G6AE6		33		33		99		99		84.378		101.655		MALE		MALE		0.194301		0.433705		71.5204		83.9762		0.613909		0.770424		0.00364964		0.00496278		157.5		92.5
G6AE6				33				99				84.378				MALE				0.0427104				60.6718				0.428776				0.000802246				1105
G6AE6				33				99				84.378				MALE				0.0748257				18.8846				0.17732				0.00140548				605
G6AE6				33				99				84.378				MALE				0.099233				52.6358				0.286064				0.00186393				352.5
G6AE6				33				99				101.655				MALE				0.265767				82.7708				0.520571				0.0031348				160
G6AE6				33				99				101.655				MALE				0.378481				79.1546				0.799541				0.00446429				125
G6AE6				33				99				101.655				MALE				0.337097				88.7978				0.778928				0.00397614				137.5
G6AE6				33				99				101.655				MALE				0.40085				91.2086				0.782906				0.00472813				95
G6AE6				33				99				101.655				MALE				0.431449				81.9672				0.871991				0.00508906				102.5
G6AE8	G6AE8	G6AE8	G6AE8	23	23	23	23	92	92	92	92	75.1366	75.1366	75.1366	75.1366	FEMALE	FEMALE	FEMALE	FEMALE	0.16788	0.135256	0.114896	0.192485	43.7962	48.6178	42.189	40.9836	0.506314	0.210012	0.405663	0.403779	0.00346021	0.00303951	0.00334448	0.0034904	202.5	97.5	195	185
G6AE8	G6AE8	G6AE8	G6AE8	23	23	23	23	92	92	92	92	75.1366	75.1366	75.1366	75.1366	FEMALE	FEMALE	FEMALE	FEMALE	0.211866	0.182374	0.140795	0.273683	28.5278	45.8052	37.7692	30.5368	0.372912	0.451283	0.478091	0.427088	0.00436681	0.00409836	0.00409836	0.00496278	152.5	142.5	165	130
G6AE8	G6AE8	G6AE8	G6AE8	23	23	23	23	92	92	92	92	75.1366	75.1366	75.1366	75.1366	FEMALE	FEMALE	FEMALE	FEMALE	0.0891863	0.0548359	0.153366	0.0653401	22.9026	38.5728	20.8936	33.7512	0.174164	0.311071	0.273119	0.390187	0.00183824	0.00123229	0.00446429	0.00118483	412.5	687.5	147.5	757.5
G6AE8	G6AE8	G6AE8	G6AE8	23	23	23	23	92	92	92	92	75.1366	75.1366	75.1366	75.1366	FEMALE	FEMALE	FEMALE	FEMALE	0.109892	0.0184913	0.0588252	0.0229397	24.5098	39.7782	36.5638	49.8232	0.136926	0.434734	0.327926	0.457094	0.00226501	0.000415541	0.00171233	0.000415973	262.5	2315	472.5	2295
G6AE8	G6AE8	G6AE8	G6AE8	23	23	23	23	92	92	92	92	75.1366	75.1366	75.1366	75.1366	FEMALE	FEMALE	FEMALE	FEMALE	0.0249254	0.184262	0.0142164	0.210887	16.8756	45.8052	42.9926	48.216	0.170461	0.487289	0.155489	0.388839	0.000513743	0.00414079	0.000413822	0.00382409	1847.5	147.5	2140	137.5
G6AE8	G6AE8	G6AE8	G6AE8	23	23	23	23	92	92	92	92	75.1366	75.1366	75.1366	75.1366	FEMALE	FEMALE	FEMALE	FEMALE	0.159597	0.2009	0.139367	0.0328452	52.234	37.7692	51.4304	45.0016	0.468466	0.4018	0.594571	0.342217	0.00328947	0.00451467	0.0040568	0.000595593	192.5	127.5	160	1547.5
G6AE8	G6AE8	G6AE8	G6AE8	23	23	23	23	92	92	92	92	75.1366	75.1366	75.1366	75.1366	FEMALE	FEMALE	FEMALE	FEMALE	0.216595	0.0250137	0.153366	0.159155	39.7782	59.4664	27.7242	57.8592	0.488076	0.479568	0.387751	0.431785	0.00446429	0.000562114	0.00446429	0.002886	142.5	1655	152.5	212.5
G6AE8	G6AE8	G6AE8	G6AE8	23	23	23	23	92	92	92	92	75.1366	75.1366	75.1366	75.1366	FEMALE	FEMALE	FEMALE	FEMALE	0.155754	0.146379	0.347009	0.182909	13.2594	53.0376	11.6522	25.3134	0.15785	0.475674	0.2378	0.330894	0.00321027	0.00328947	0.010101	0.00331675	227.5	192.5	50	225
G6AE8	G6AE8	G6AE8	G6AE8	23	23	23	23	92	92	92	92	75.1366	75.1366	75.1366	75.1366	FEMALE	FEMALE	FEMALE	FEMALE	0.0347421	0.0454539	0.0258494	0.0866411	60.27	49.0196	29.3314	18.8846	0.170254	0.482952	0.171029	0.255197	0.000716076	0.00102145	0.000752445	0.00157109	1042.5	877.5	1157.5	562.5
G6AE8	G6AE8	G6AE8	G6AE8	23	23	23	23	92	92	92	92	75.1366	75.1366	75.1366	75.1366	FEMALE	FEMALE	FEMALE	FEMALE	0.139018	0.156688	0.0912454	0.165111	56.6538	38.171	61.8772	52.234	0.407581	0.395554	0.340921	0.404915	0.00286533	0.00352113	0.00265604	0.00299401	210	187.5	195	205
G6AE8	G6AE8	G6AE8	G6AE8	23	23	23	23	92	92	92	92	75.1366	89.6014	75.1366	89.6014	FEMALE	FEMALE	FEMALE	FEMALE	0.17547	0.236729	0.105219	0.166779	36.9656	53.8412	51.8322	54.6448	0.393251	0.482881	0.31605	0.41555	0.00361664	0.00318471	0.00306279	0.00292826	182.5	202.5	162.5	210
G6AE8	G6AE8	G6AE8	G6AE8	23	23	23	23	92	92	92	92	75.1366	89.6014	75.1366	89.6014	FEMALE	FEMALE	FEMALE	FEMALE	0.0852678	0.20998	0.036105	0.164373	16.4738	66.6988	45.0016	61.8772	0.141406	0.517045	0.302024	0.453313	0.00175747	0.00282486	0.00105097	0.002886	452.5	225	802.5	210
G6AE8	G6AE8	G6AE8	G6AE8	23	23	23	23	92	92	92	92	75.1366	89.6014	75.1366	89.6014	FEMALE	FEMALE	FEMALE	FEMALE	0.118624	0.200089	0.150017	0.152286	49.4214	67.9042	28.126	68.306	0.464051	0.570624	0.291461	0.45843	0.00244499	0.00269179	0.00436681	0.0026738	302.5	252.5	132.5	225
G6AE8	G6AE8	G6AE8	G6AE8	23	23	23	23	92	92	92	92	89.6014	89.6014	89.6014	89.6014	FEMALE	FEMALE	FEMALE	FEMALE	0.0161742	0.194844	0.242522	0.132763	67.9042	62.279	59.4664	63.0826	0.448213	0.432493	0.435651	0.519198	0.00282486	0.00262123	0.00326264	0.002331	202.5	237.5	170	307.5
G6AE8	G6AE8	G6AE8	G6AE8	23	23	23	23	92	92	92	92	89.6014	89.6014	89.6014	89.6014	FEMALE	FEMALE	FEMALE	FEMALE	0.0151073	0.174286	0.208508	0.135125	69.9132	65.0916	68.7078	66.297	0.385197	0.452025	0.41895	0.534653	0.00263852	0.00234467	0.00280505	0.00237248	197.5	282.5	192.5	297.5
G6AE8	G6AE8	G6AE8	G6AE8	23	23	23	23	92	92	92	92	89.6014	89.6014	89.6014	89.6014	FEMALE	FEMALE	FEMALE	FEMALE	0.0161742	0.196129	0.198751	0.185824	69.9132	73.1276	69.9132	26.5188	0.4263	0.499165	0.4018	0.398779	0.00282486	0.00263852	0.0026738	0.00326264	190	232.5	200	240
G6AE8	G6AE8	G6AE8	G6AE8	23	23	23	23	92	92	92	92	89.6014	85.1816	89.6014	85.1816	FEMALE	FEMALE	FEMALE	FEMALE	0.0138301	0.221878	0.194844	0.28464	67.5024	64.6898	68.306	62.279	0.399422	0.622017	0.356689	0.598837	0.00241546	0.00401606	0.00262123	0.00382409	245	145	190	157.5
G6AE8	G6AE8	G6AE8	G6AE8	23	23	23	23	92	92	92	92	89.6014	85.1816	89.6014	85.1816	FEMALE	FEMALE	FEMALE	FEMALE	0.0134247	0.209271	0.163729	0.290189	70.315	68.306	69.5114	67.5024	0.42875	0.641371	0.328659	0.605403	0.00234467	0.00378788	0.00220264	0.00389864	262.5	157.5	242.5	145
G6AE8	G6AE8	G6AE8	G6AE8	23	23	23	23	92	92	92	92	89.6014	85.1816	89.6014	85.1816	FEMALE	FEMALE	FEMALE	FEMALE	0.0183809	0.180253	0.196129	0.287388	55.4484	58.6628	70.7168	52.234	0.475952	0.538191	0.400662	0.50225	0.00321027	0.00326264	0.00263852	0.003861	195	197.5	202.5	155
G6AE8	G6AE8	G6AE8	G6AE8	23	23	23	23	92	92	92	92	89.6014	85.1816	85.1816	85.1816	FEMALE	FEMALE	FEMALE	FEMALE	0.0138301	0.161779	0.0556097	0.25104	14.063	55.8502	68.7078	47.8142	0.287	0.62753	0.554095	0.482972	0.00241546	0.00292826	0.00389864	0.00337268	365	252.5	132.5	197.5
G6AE8	G6AE8	G6AE8	G6AE8	23	23	23	23	92	92	92	92	85.1816	85.1816	85.1816	85.1816	FEMALE	FEMALE	FEMALE	FEMALE	0.273741	0.194533	0.055073	0.210264	70.1661	68.306	65.8952	68.306	0.523628	0.626661	0.553741	0.562189	0.00389864	0.00352113	0.003861	0.00282486	122.5	175	140	232.5
G6AE8	G6AE8	G6AE8	G6AE8	23	23	23	23	92	92	92	92	85.1816	85.1816	85.1816	85.1816	FEMALE	FEMALE	FEMALE	FEMALE	0.256257	0.20349	0.045791	0.231519	72.7258	44.5998	63.8862	71.1186	0.513963	0.564554	0.476763	0.502605	0.00364964	0.00368324	0.00321027	0.00311042	132.5	192.5	177.5	180
G6AE8	G6AE8	G6AE8	G6AE8	23	23	23	23	92	92	92	92	85.1816	82.369	85.1816	82.369	FEMALE	FEMALE	FEMALE	FEMALE	0.309998	0.247262	0.0414648	0.162052	52.6358	75.1366	57.0556	63.8862	0.494233	0.673871	0.451032	0.586112	0.00441501	0.00375235	0.00290698	0.00368324	120	155	217.5	162.5
G6AE8	G6AE8	G6AE8	G6AE8	23	23	23	23	92	92	92	92	85.1816	82.369	85.1816	82.369	FEMALE	FEMALE	FEMALE	FEMALE	0.213418	0.236184	0.0469207	0.157696	56.252	54.243	71.9222	67.9042	0.504502	0.534414	0.474734	0.479888	0.00303951	0.00358423	0.00328947	0.00358423	217.5	177.5	152.5	137.5
G6AE8	G6AE8	G6AE8	G6AE8	23	23	23	23	92	92	92	92	85.1816	82.369	85.1816	82.369	FEMALE	FEMALE	FEMALE	FEMALE	0.191581	0.264639	0.0643968	0.165092	71.9222	61.4754	30.135	57.4574	0.474734	0.653994	0.470859	0.504012	0.00272851	0.00401606	0.00451467	0.00375235	215	155	157.5	152.5
G6AE8	G6AE8	G6AE8	G6AE8	23	23	23	23	92	92	92	92	85.1816	82.369	85.1816	82.369	FEMALE	FEMALE	FEMALE	FEMALE	0.251665	0.272858	0.0362028	0.186034	66.297	49.0196	28.126	56.6538	0.524087	0.521485	0.246719	0.531961	0.00358423	0.00414079	0.00253807	0.00422833	152.5	147.5	280	130
G6AE8	G6AE8	G6AE8	G6AE8	23	23	23	23	92	92	92	92	82.369	82.369	82.369	82.369	FEMALE	FEMALE	FEMALE	FEMALE	0.175617	0.17619	0.266889	0.154919	77.5474	28.5278	68.306	38.5728	0.538524	0.385511	0.466253	0.433402	0.00340136	0.0026738	0.00364964	0.00352113	150	300	127.5	195
G6AE8	G6AE8	G6AE8	G6AE8	23	23	23	23	92	92	92	92	82.369	82.369	82.369	82.369	FEMALE	FEMALE	FEMALE	FEMALE	0.213794	0.140501	0.282346	0.0823916	57.4574	66.6988	74.333	42.9926	0.493197	0.548961	0.544564	0.54421	0.00414079	0.0021322	0.003861	0.00187266	125	347.5	122.5	455
G6AE8	G6AE8	G6AE8	G6AE8	23	23	23	23	92	92	92	92	82.369	89.6014	82.369	89.6014	FEMALE	FEMALE	FEMALE	FEMALE	0.191938	0.333638	0.27185	0.307472	61.4754	87.1906	55.8502	79.9582	0.527686	0.76483	0.469329	0.87386	0.00371747	0.00446429	0.00371747	0.00451467	152.5	110	150	130
G6AE8	G6AE8	G6AE8	G6AE8	23	23	23	23	92	92	92	92	82.369	89.6014	82.369	89.6014	FEMALE	FEMALE	FEMALE	FEMALE	0.220647	0.361912	0.299703	0.329807	57.8592	87.9942	60.27	81.9672	0.518917	0.789186	0.552936	0.895816	0.0042735	0.00484262	0.00409836	0.00484262	122.5	95	135	115
G6AE8	G6AE8	G6AE8	G6AE8	23	23	23	23	92	92	92	92	82.369	89.6014	82.369	89.6014	FEMALE	FEMALE	FEMALE	FEMALE	0.207355	0.337403	0.296664	0.325862	31.7422	79.1546	48.216	81.5654	0.414931	0.679439	0.422947	0.845237	0.00401606	0.00451467	0.0040568	0.00478469	172.5	105	132.5	112.5
G6AE8	G6AE8	G6AE8	G6AE8	23	23	23	23	92	92	92	92	82.369	89.6014	82.369	89.6014	FEMALE	FEMALE	FEMALE	FEMALE	0.0880329	0.316003	0.244574	0.32201	56.252	71.9222	23.7062	61.8772	0.259824	0.708593	0.439004	0.715343	0.00170503	0.00422833	0.00334448	0.00472813	370	135	245	125
G6AE8	G6AE8	G6AE8	G6AE8	23	23	23	23	92	92	92	92	89.6014	82.7708	82.369	82.7708	FEMALE	FEMALE	FEMALE	FEMALE	0.333116	0.254185	0.131406	0.234383	90.0032	51.4304	73.9312	55.8502	0.740767	0.482915	0.496183	0.479401	0.0042735	0.00358423	0.00179695	0.00323625	112.5	172.5	407.5	192.5
G6AE8	G6AE8	G6AE8	G6AE8	23	23	23	23	92	92	92	92	89.6014	82.7708	89.6014	82.7708	FEMALE	FEMALE	FEMALE	FEMALE	0.382104	0.241217	0.369234	0.25279	86.7888	64.6898	89.6014	60.27	0.814918	0.501471	0.708311	0.418542	0.00490196	0.00340136	0.00456621	0.0034904	97.5	165	92.5	142.5
G6AE8	G6AE8	G6AE8	G6AE8	23	23	23	23	92	92	92	92	89.6014	82.7708	89.6014	82.7708	FEMALE	FEMALE	FEMALE	FEMALE	0.372963	0.237183	0.373498	0.232502	87.5924	55.0466	86.7888	54.243	0.785582	0.493691	0.69991	0.455824	0.00478469	0.00334448	0.00461894	0.00321027	97.5	187.5	92.5	192.5
G6AE8	G6AE8	G6AE8	G6AE8	23	23	23	23	92	92	92	92	89.6014	82.7708	89.6014	82.7708	FEMALE	FEMALE	FEMALE	FEMALE	0.319464	0.229507	0.401301	0.236295	71.1186	62.279	85.9852	60.6718	0.551307	0.492324	0.693429	0.489289	0.00409836	0.00323625	0.00496278	0.00326264	115	182.5	77.5	182.5
G6AE8	G6AE8	G6AE8	G6AE8	23	23	23	23	92	92	92	92	82.7708	82.7708	89.6014	82.7708	FEMALE	FEMALE	FEMALE	FEMALE	0.229781	0.233282	0.439469	0.193648	64.6898	45.8052	68.306	49.0196	0.406854	0.430096	0.746514	0.395319	0.00315956	0.00328947	0.00543478	0.0026738	157.5	197.5	92.5	250
G6AE8	G6AE8	G6AE8	G6AE8	23	23	23	23	92	92	92	92	82.7708	82.7708	89.6014	82.7708	FEMALE	FEMALE	FEMALE	FEMALE	0.289168	0.184682	0.292449	0.0895234	60.6718	42.5908	83.1726	6.027	0.479619	0.465473	0.598364	0.191333	0.00397614	0.00260417	0.00361664	0.00123609	125	292.5	137.5	777.5
G6AE8	G6AE8	G6AE8	G6AE8	23	23	23	23	92	92	92	92	82.7708	82.7708	82.7708	82.7708	FEMALE	FEMALE	FEMALE	FEMALE	0.20544	0.0532615	0.211315	0.161302	66.297	75.1366	67.1006	37.3674	0.410508	0.512878	0.474209	0.377448	0.00282486	0.000751033	0.00334448	0.00222717	192.5	1185	157.5	350
G6AE8	G6AE8	G6AE8	G6AE8	23	23	23	23	92	92	92	92	82.7708	85.1816	82.7708	82.7708	FEMALE	FEMALE	FEMALE	FEMALE	0.217742	0.162718	0.211315	0.188605	70.315	76.342	53.4394	63.0826	0.398385	0.591798	0.358654	0.489012	0.00299401	0.0035524	0.00334448	0.00260417	157.5	152.5	150	255
G6AE8	G6AE8	G6AE8	G6AE8	23	23	23	23	92	92	92	92	82.7708	85.1816	82.7708	85.1816	FEMALE	FEMALE	FEMALE	FEMALE	0.226208	0.17028	0.196526	0.196177	42.189	65.4934	68.7078	72.7258	0.426152	0.507701	0.439027	0.563766	0.00311042	0.00371747	0.00311042	0.0031348	222.5	140	165	190
G6AE8	G6AE8	G6AE8	G6AE8	23	23	23	23	92	92	92	92	82.7708	85.1816	82.7708	85.1816	FEMALE	FEMALE	FEMALE	FEMALE	0.185762	0.134129	0.160363	0.230499	9.6432	23.3044	66.297	72.7258	0.1968	0.364131	0.306222	0.553048	0.00255428	0.00292826	0.00253807	0.00368324	342.5	277.5	177.5	140
G6AE8	G6AE8	G6AE8	G6AE8	23	23	23	23	92	92	92	92	82.7708	85.1816	82.7708	85.1816	FEMALE	FEMALE	FEMALE	FEMALE	0.083449	0.0722479	0.224451	0.22231	31.3404	52.6358	37.3674	49.4214	0.203509	0.424482	0.368152	0.424218	0.00114745	0.00157729	0.0035524	0.0035524	717.5	510	180	165
G6AE8	G6AE8	G6AE8	G6AE8	23	23	23	23	92	92	92	92	82.7708	85.1816	82.7708	85.1816	FEMALE	FEMALE	FEMALE	FEMALE	0.185762	0.106153	0.0480845	0.0979348	70.315	50.6268	67.5024	34.9566	0.449297	0.392456	0.357156	0.41615	0.00255428	0.0023175	0.000761035	0.00156495	235	302.5	1125	555
G6AE8	G6AE8	G6AE8	G6AE8	23	23	23	23	92	92	92	92	85.1816	85.1816	85.1816	85.1816	FEMALE	FEMALE	FEMALE	FEMALE	0.200275	0.0527102	0.169294	0.139377	78.351	68.306	72.324	59.4664	0.525846	0.49141	0.549992	0.420257	0.00311042	0.00115075	0.00361664	0.00222717	172.5	730	145	307.5
G6AE8	G6AE8	G6AE8	G6AE8	23	23	23	23	92	92	92	92	85.1816	85.1816	85.1816	85.1816	FEMALE	FEMALE	FEMALE	FEMALE	0.241608	0.1558	0.177309	0.0703941	71.5204	24.5098	65.0916	54.6448	0.523959	0.310251	0.514558	0.41555	0.00375235	0.00340136	0.00378788	0.00112486	130	215	137.5	757.5
G6AE8	G6AE8	G6AE8	G6AE8	23	23	23	23	92	92	92	92	85.1816	70.315	85.1816	85.1816	FEMALE	FEMALE	FEMALE	FEMALE	0.266619	0.180742	0.159217	0.202525	39.7782	51.0286	26.117	55.0466	0.423172	0.38081	0.378507	0.493691	0.00414079	0.00340136	0.00340136	0.00323625	147.5	160	225	197.5
G6AE8	G6AE8	G6AE8	G6AE8	23	23	23	23	92	92	92	92	85.1816	70.315	85.1816	70.315	FEMALE	FEMALE	FEMALE	FEMALE	0.0908159	0.134868	0.0726859	0.0777053	53.4394	47.4124	44.5998	114.702	0.202422	0.390226	0.399998	0.228717	0.00141044	0.00253807	0.0015528	0.00137646	445	272.5	532.5	225
G6AE8	G6AE8	G6AE8	G6AE8	23	23	23	23	92	92	92	92	85.1816	70.315	85.1816	70.315	FEMALE	FEMALE	FEMALE	FEMALE	0.161375	0.0158906	0.450093	0.0166577	57.8592	61.4754	16.072	51.4304	0.332524	0.467494	0.232928	0.287321	0.00250627	0.000299043	0.00961538	0.000295072	225	3212.5	35	3210
G6AE8	G6AE8	G6AE8	G6AE8	23	23	23	23	92	92	92	92	85.1816	70.315	85.1816	70.315	FEMALE	FEMALE	FEMALE	FEMALE	0.175685	0.21557	0.112388	0.193663	31.7422	27.7242	56.252	61.8772	0.356654	0.350939	0.282673	0.40843	0.00272851	0.0040568	0.00240096	0.00343053	277.5	167.5	217.5	140
G6AE8	G6AE8	G6AE8	G6AE8	23	23	23	23	92	92	92	92	85.1816	70.315	85.1816	70.315	FEMALE	FEMALE	FEMALE	FEMALE	0.1265	0.211284	0.0569808	0.101443	22.5008	29.3314	57.8592	33.3494	0.314697	0.329566	0.408899	0.374712	0.00196464	0.00397614	0.00121729	0.00179695	437.5	162.5	680	467.5
G6AE8	G6AE8	G6AE8	G6AE8	23	23	23	23	92	92	92	92	85.1816	70.315	85.1816	70.315	FEMALE	FEMALE	FEMALE	FEMALE	0.205059	0.0495922	0.170838	0.0548619	60.6718	47.4124	43.3944	62.6808	0.509847	0.398424	0.407459	0.365486	0.00318471	0.000933271	0.00364964	0.000971817	195	952.5	167.5	857.5
G6AE8	G6AE8	G6AE8	G6AE8	23	23	23	23	92	92	92	92	70.315	70.315	70.315	70.315	FEMALE	FEMALE	FEMALE	FEMALE	0.167522	0.134018	0.00420829	0.127146	53.0376	50.6268	49.0196	55.8502	0.362031	0.400212	0.346428	0.409159	0.0031348	0.00252207	0.00182149	0.00225225	172.5	270	407.5	307.5
G6AE8	G6AE8	G6AE8	G6AE8	23	23	23	23	92	92	92	92	70.315	70.315	70.315	83.9762	FEMALE	FEMALE	FEMALE	FEMALE	0.148856	0.140206	0.000658407	0.235513	59.4664	45.8052	129.38	62.6808	0.298826	0.410809	0.286555	0.4592	0.00278552	0.00263852	0.000284981	0.0035524	160	267.5	3057.5	145
G6AE8	G6AE8	G6AE8	G6AE8	23	23	23	23	92	92	92	92	70.315	83.9762	70.315	83.9762	FEMALE	FEMALE	FEMALE	FEMALE	0.0158739	0.239807	0.00946865	0.20462	59.4664	56.252	29.7332	50.6268	0.2296	0.472706	0.334081	0.392456	0.000297044	0.00352113	0.00409836	0.00308642	3107.5	165	155	195
G6AE8	G6AE8	G6AE8	G6AE8	23	23	23	23	92	92	92	92	70.315	83.9762	70.315	83.9762	FEMALE	FEMALE	FEMALE	FEMALE	0.177245	0.227776	0.0105495	0.185966	63.0826	36.9656	28.126	47.0106	0.462144	0.499535	0.152859	0.474855	0.00331675	0.00334448	0.00456621	0.00280505	165	225	35	257.5
G6AE8	G6AE8	G6AE8	G6AE8	23	23	23	23	92	92	92	92	70.315	83.9762	70.315	83.9762	FEMALE	FEMALE	FEMALE	FEMALE	0.0931	0.185826	0.00215116	0.214553	26.9206	67.1006	48.216	54.6448	0.146308	0.541134	0.329119	0.386182	0.00174216	0.00272851	0.000931099	0.00323625	390	242.5	927.5	167.5
G6AE8	G6AE8	G6AE8	G6AE8	23	23	23	23	92	92	92	92	70.315	83.9762	70.315	83.9762	FEMALE	FEMALE	FEMALE	FEMALE	0.0798795	0.199429	0.00544894	0.198494	30.135	49.8232	57.4574	27.7242	0.17319	0.457094	0.296172	0.362408	0.00149477	0.00292826	0.00235849	0.00299401	495	232.5	230	257.5
G6AE8	G6AE8	G6AE8	G6AE8	23	23	23	23	92	92	92	92	70.315	83.9762	70.315	83.9762	FEMALE	FEMALE	FEMALE	FEMALE	0.140077	0.0710168	0.00548126	0.0707923	54.243	46.6088	52.6358	69.9132	0.311741	0.554867	0.267867	0.494086	0.00262123	0.00104275	0.00237248	0.00106781	207.5	875	225	795
G6AE8	G6AE8	G6AE8	G6AE8	23	23	23	23	92	92	92	92	70.315	83.9762	70.315	83.9762	FEMALE	FEMALE	FEMALE	FEMALE	0.134778	0.225888	0.00206466	0.203054	48.6178	61.4754	10.045	59.8682	0.310657	0.563994	0.135743	0.54925	0.00252207	0.00331675	0.000893655	0.00306279	240	192.5	1045	217.5
G6AE8	G6AE8	G6AE8	G6AE8	23	23	23	23	92	93	92	93	83.9762	90.0032	83.9762	90.0032	FEMALE	FEMALE	FEMALE	FEMALE	0.261407	0.123507	0.239839	0.133817	60.27	68.306	51.0286		0.552936	0.550855	0.38805		0.00393701	0.00321027	0.00343053	0.00346021	145	187.5	160	150
G6AE8	G6AE8	G6AE8	G6AE8	23	23	23	23	92	93	92	93	83.9762	90.0032	83.9762	90.0032	FEMALE	FEMALE	FEMALE	FEMALE	0.195863	0.135466	0.1989	0.139867	57.4574	51.0286	45.0016	62.6808	0.420933	0.528794	0.307178	0.47666	0.00294985	0.00352113	0.00284495	0.00361664	202.5	187.5	205	145
G6AE8	G6AE8	G6AE8	G6AE8	23	23	23	23	92	93	92	93	83.9762	90.0032	83.9762	90.0032	FEMALE	FEMALE	FEMALE	FEMALE	0.178728	0.113488	0.215781	0.119362	53.8412	44.5998	69.1096	49.0196	0.367517	0.299328	0.441595	0.429996	0.00269179	0.00294985	0.00308642	0.00308642	225	190	167.5	210
G6AE8	G6AE8	G6AE8	G6AE8	23	23	23	23	92	93	92	93	83.9762	90.0032	83.9762	90.0032	FEMALE	FEMALE	FEMALE	FEMALE	0.206524	0.0820306	0.215781	0.0763539	59.8682	54.243	45.0016	38.5728	0.36505	0.455824	0.370384	0.433402	0.00311042	0.0021322	0.00308642	0.00197433	157.5	350	202.5	417.5
G6AE8	G6AE8	G6AE8	G6AE8	23	23	23	23	92	93	92	93	83.9762	90.0032	83.9762	90.0032	FEMALE	FEMALE	FEMALE	FEMALE	0.225842	0.102867	0.0736704	0.119362	37.7692	42.5908	51.4304	47.0106	0.381507	0.465473	0.34517	0.386919	0.00340136	0.0026738	0.00105374	0.00308642	195	282.5	800	202.5
G6AE8	G6AE8	G6AE8	G6AE8	23	23	23	23	92	93	92	93	83.9762	90.0032	83.9762	90.0032	FEMALE	FEMALE	FEMALE	FEMALE	0.0674771	0.123507	0.222654	0.115788	69.1096	49.8232	63.0826	47.4124	0.441595	0.516303	0.479716	0.478913	0.00101626	0.00321027	0.00318471	0.00299401	827.5	215	182.5	235
G6AE8	G6AE8	G6AE8	G6AE8	23	23	23	23	92	93	93	93	83.9762	90.0032	90.0032	90.0032	FEMALE	FEMALE	FEMALE	FEMALE	0.198795	0.12867	0.118217	0.126177	67.9042	36.9656	69.5114	50.225	0.390254	0.48321	0.509241	0.507323	0.00299401	0.00334448	0.00340136	0.00326264	160	222.5	157.5	207.5
G6AE8	G6AE8	G6AE8	G6AE8	23	23	23	23	93	93	93	93	90.0032	90.0032	90.0032	90.0032	FEMALE	FEMALE	FEMALE	FEMALE	0.137648	0.0685171	0.128014	0.0815891		42.5908	49.4214	24.9116		0.453094	0.390683	0.245434	0.00326264	0.00178094	0.00368324	0.0021097	162.5	467.5	145	372.5
G6AE8	G6AE8	G6AE8	G6AE8	23	23	23	23	93	93	93	93	90.0032	82.369	90.0032	90.0032	FEMALE	FEMALE	FEMALE	FEMALE	0.184231	0.14944	0.118217	0.0975366	55.0466	64.6898	41.7872	24.9116	0.585602	0.567454	0.4018	0.305664	0.00436681	0.00409836	0.00340136	0.00252207	135	130	190	315
G6AE8	G6AE8	G6AE8	G6AE8	23	23	23	23	93	93	93	93	90.0032	82.369	90.0032	82.369	FEMALE	FEMALE	FEMALE	FEMALE	0.117518	0.174466	0.0689597	0.25977	64.288	61.4754	54.6448	56.252	0.424343	0.754299	0.469054	0.568202	0.00278552	0.00478469	0.00198413	0.00409836	207.5	127.5	387.5	145
G6AE8	G6AE8	G6AE8	G6AE8	23	23	23	23	93	93	93	93	90.0032	82.369	90.0032	82.369	FEMALE	FEMALE	FEMALE	FEMALE	0.0849728	0.178742	0.0941889	0.265205	43.3944	74.333	44.5998	63.4844	0.364659	0.750838	0.374788	0.596098	0.0020141	0.00490196	0.00271003	0.0041841	377.5	105	250	132.5
G6AE8	G6AE8	G6AE8	G6AE8	23	23	23	23	93	93	93	93	90.0032	82.369	90.0032	82.369	FEMALE	FEMALE	FEMALE	FEMALE	0.145983	0.168422	0.109813	0.292767	36.5638	57.4574	54.243	75.1366	0.369331	0.566083	0.420488	0.644949	0.00346021	0.00461894	0.00315956	0.00461894	190	115	187.5	100
G6AE8	G6AE8	G6AE8	G6AE8	23	23	23	23	93	93	93	93	90.0032	82.369	90.0032	82.369	FEMALE	FEMALE	FEMALE	FEMALE	0.120026	0.154179	0.107271	0.330987	52.234	36.5638	38.5728	60.6718	0.468466	0.494105	0.263296	0.628723	0.00284495	0.00422833	0.00308642	0.00522193	240	162.5	177.5	95
G6AE8	G6AE8	G6AE8	G6AE8	23	23	23	23	93	93	93	93	90.0032	82.369	90.0032	82.369	FEMALE	FEMALE	FEMALE	FEMALE	0.137648	0.0547087	0.0647823	0.262459	53.0376	37.7692	43.7962	54.6448	0.509977	0.528241	0.368035	0.525431	0.00326264	0.00150038	0.00186393	0.00414079	202.5	595	417.5	137.5
G6AE8	G6AE8	G6AE8	G6AE8	23	23	23	23	93	93	93	93	90.0032	92.8158	82.369	82.369	FEMALE	FEMALE	FEMALE	FEMALE	0.131226	0.0905709	0.178134	0.174132	21.6972	61.0736	70.315	27.7242	0.274648	0.3724	0.616798	0.416905	0.00311042	0.00143575	0.00397614	0.00274725	242.5	532.5	137.5	297.5
G6AE8	G6AE8	G6AE8	G6AE8	23	23	23	23	93	93	93	93	90.0032	92.8158	82.369	82.369	FEMALE	FEMALE	FEMALE	FEMALE	0.0797524	0.0522856	0.18551	0.100769	27.3224	32.5458	75.5384	61.8772	0.315866	0.320648	0.648398	0.542782	0.00189036	0.000828844	0.00414079	0.00158983	442.5	1105	125	515
G6AE8	G6AE8	G6AE8	G6AE8	23	23	23	23	93	93	93	93	82.369	92.8158	82.369	92.8158	FEMALE	FEMALE	FEMALE	FEMALE	0.252202	0.291375	0.253828	0.146876	63.4844	29.3314	62.6808	0	0.54493	0.410229	0.704279	0	0.00389864	0.00461894	0.00566572	0.00840336	140	145	87.5	105
G6AE8	G6AE8	G6AE8	G6AE8	23	23	23	23	93	93	93	93	82.369	92.8158	82.369	92.8158	FEMALE	FEMALE	FEMALE	FEMALE	0.288794	0.128347	0.20226	0.0364891	64.288	53.8412	59.8682	50.225	0.576574	0.409439	0.52516	0.354947	0.00446429	0.00203459	0.00451467	0.00208768	112.5	360	107.5	337.5
G6AE8	G6AE8	G6AE8	G6AE8	23	23	23	23	93	93	93	93	82.369	92.8158	82.369	92.8158	FEMALE	FEMALE	FEMALE	FEMALE	0.313268	0.142882	0.132155	0.0164657	75.9402	54.243	44.5998	22.9026	0.681078	0.404799	0.226971	0.215048	0.00484262	0.00226501	0.00294985	0.000942063	95	307.5	142.5	955
G6AE8	G6AE8	G6AE8	G6AE8	23	23	23	23	93	93	93	93	82.369	92.8158	82.369	92.8158	FEMALE	FEMALE	FEMALE	FEMALE	0.333453	0.114384	0.0685026	0.101914	63.0826	67.5024	22.099	23.3044	0.621503	0.513326	0.332316	0.314924	0.00515464	0.00181324	0.00152905	0.0058309	92.5	420	587.5	97.5
G6AE8	G6AE8	G6AE8	G6AE8	23	23	23	23	93	93	93	93	82.369	92.8158	92.8158	92.8158	FEMALE	FEMALE	FEMALE	FEMALE	0.292053	0.131696	0.1164	0.0265225	53.0376	56.252	50.6268	55.4484	0.595928	0.48285	0.286837	0.406215	0.00451467	0.00208768	0.00189036	0.00151745	132.5	362.5	352.5	522.5
G6AE8	G6AE8	G6AE8	G6AE8	23	23	23	23	93	93	93	93	82.369	101.655	92.8158	92.8158	FEMALE	FEMALE	FEMALE	FEMALE	0.21106	0.07916	0.0516793	0.0402726	25.3134		44.198	60.27	0.448025		0.317971	0.458327	0.00326264	0.00192678	0.000839278	0.00230415	250	447.5	1052.5	302.5
G6AE8	G6AE8	G6AE8	G6AE8	23	23	23	23	93	93	93	93	82.369	101.655	92.8158	92.8158	FEMALE	FEMALE	FEMALE	FEMALE	0.0928784	0.0456997	0.393456	0.030187	73.1276	61.8772	12.8576	55.0466	0.48269	0.437295	0.179827	0.403272	0.00143575	0.00111235	0.00638978	0.00172712	545	757.5	85	442.5
G6AE8	G6AE8	G6AE8	G6AE8	23	23	23	23	93	93	93	93	92.8158	101.655	92.8158	92.8158	FEMALE	FEMALE	FEMALE	FEMALE	0.0909587	0.117719	0.117511	0.0417143		53.0376	63.0826	57.4574		0.388554	0.347563	0.463366	0.00393701	0.00286533	0.0019084	0.00238663	30	212.5	342.5	295
G6AE8	G6AE8	G6AE8	G6AE8	23	23	23	23	93	93	93	93	92.8158	101.655	92.8158	92.8158	FEMALE	FEMALE	FEMALE	FEMALE	0.0517436	0.0853251	0.137908	0.0251849	37.7692	42.9926	66.297	12.8576	0.346506	0.377128	0.333151	0.227568	0.00223964	0.00207684	0.00223964	0.00144092	337.5	367.5	247.5	637.5
G6AE8	G6AE8	G6AE8	G6AE8	23	23	23	23	93	93	93	93	92.8158	101.655	92.8158	92.8158	FEMALE	FEMALE	FEMALE	FEMALE	0.039225	0.0776636	0.109177	0.0214064	28.5278	36.5638	60.27	32.9476	0.20161	0.369331	0.373189	0.360083	0.00169779	0.00189036	0.00177305	0.00122474	447.5	430	402.5	725
G6AE8	G6AE8	G6AE8	G6AE8	23	23	23	23	93	93	93	93	92.8158	101.655	92.8158	101.655	FEMALE	FEMALE	FEMALE	FEMALE	0.0517436	0.0581515	0.130596	0.048878	12.8576	26.117	61.0736		0.2009	0.330595	0.269641		0.00223964	0.00141543	0.00212089	0.000957854	382.5	627.5	245	947.5
G6AE8	G6AE8	G6AE8	G6AE8	23	23	23	23	93	93	93	93	92.8158	101.655	101.655	101.655	FEMALE	FEMALE	FEMALE	FEMALE	0.123879	0.0823328	0.0478333	0.146214	12.8576	42.189		63.8862	0.11796	0.347235		0.4018	0.00536193	0.00200401	0.00250627	0.00286533	77.5	377.5	295	190
G6AE8	G6AE8	G6AE8	G6AE8	23	23	23	23	93	93	93	93	92.8158	101.655	101.655	101.655	FEMALE	FEMALE	FEMALE	FEMALE	0.032586	0.0483911	0.0193467	0.131179	59.0646	36.162	67.1006	37.3674	0.244574	0.418058	0.359789	0.30135	0.00141044	0.00117786	0.00101368	0.00257069	467.5	762.5	800	265
G6AE8	G6AE8	G6AE8	G6AE8	23	23	23	23	93	93	93	93	92.8158	101.655	101.655	101.655	FEMALE	FEMALE	FEMALE	FEMALE	0.0520349	0.0527395	0.0503575	0.0987969	69.9132	43.3944	53.0376	37.3674	0.346964	0.427531	0.250769	0.24665	0.00225225	0.0012837	0.00263852	0.00193611	242.5	677.5	167.5	365
G6AE8	G6AE8	G6AE8	G6AE8	23	23	23	23	93	93	93	93	92.8158	82.7708	101.655	101.655	FEMALE	FEMALE	FEMALE	FEMALE	0.043265	0.229703	0.0472413	0.0732643	56.252	66.297	34.153	40.5818	0.205299	0.545654	0.250205	0.308607	0.00187266	0.00358423	0.00247525	0.00143575	260	157.5	267.5	565
G6AE8	G6AE8	G6AE8	G6AE8	23	23	23	23	93	93	93	93	92.8158	82.7708	101.655	101.655	FEMALE	FEMALE	FEMALE	FEMALE	0.052929	0.221755	0.0380568	0.090077	63.4844	61.0736	38.5728	34.5548	0.349776	0.649719	0.186793	0.349038	0.00229095	0.00346021	0.00199402	0.00176523	255	195	295	467.5
G6AE8	G6AE8	G6AE8	G6AE8	23	23	23	23	93	93	93	93	92.8158	82.7708	101.655	101.655	FEMALE	FEMALE	FEMALE	FEMALE	0.0568352	0.249852	0.0285284	0.057239	24.5098	63.8862	37.3674	39.3764	0.291783	0.61429	0.200361	0.330894	0.00246002	0.00389864	0.00149477	0.0011217	322.5	152.5	482.5	772.5
G6AE8	G6AE8	G6AE8	G6AE8	23	23	23	23	93	93	93	93	92.8158	82.7708	101.655	101.655	FEMALE	FEMALE	FEMALE	FEMALE	0.0195544	0.160619	0.0338395	0.0925269	45.0016	34.5548	44.5998	34.5548	0.175445	0.437403	0.232897	0.670967	0.000846382	0.00250627	0.00177305	0.00181324	925	320	372.5	500
G6AE8	G6AE8	G6AE8	G6AE8	23	23	23	23	93	93	93	93	101.655	82.7708	101.655	101.655	FEMALE	FEMALE	FEMALE	FEMALE	0.0632986	0.107891	0.0209386	0.076562		66.297	32.5458	48.216		0.724557	0.176879	0.298551	0.000969462	0.0016835	0.00109709	0.00150038	870	502.5	727.5	505
G6AE8	G6AE8	G6AE8	G6AE8	23	23	23	23	93	93	93	93	101.655	82.7708	101.655	82.7708	FEMALE	FEMALE	FEMALE	FEMALE	0.198457	0.247441	0.0466638	0.244893	62.6808	59.8682	22.5008	61.0736	0.450941	0.636896	0.115984	0.587246	0.00303951	0.003861	0.00244499	0.00364964	190	165	215	170
G6AE8	G6AE8	G6AE8	G6AE8	23	23	23	23	93	93	93	93	101.655	83.9762	101.655	82.7708	FEMALE	FEMALE	FEMALE	FEMALE	0.167847	0.204855	0.0542973	0.222556	42.189	70.7168	24.5098	56.252	0.303518	0.664008	0.147206	0.516073	0.00257069	0.00393701	0.00284495	0.00331675	250	147.5	185	192.5
G6AE8	G6AE8	G6AE8	G6AE8	23	23	23	23	93	93	93	93	101.655	83.9762	82.7708	82.7708	FEMALE	FEMALE	FEMALE	FEMALE	0.145418	0.234912	0.262178	0.249445	34.153	70.7168	61.8772	67.5024	0.287	0.648778	0.49901	0.494523	0.00222717	0.00451467	0.003861	0.00371747	330	112.5	135	132.5
G6AE8	G6AE8	G6AE8	G6AE8	23	23	23	23	93	93	93	93	101.655	83.9762	82.7708	82.7708	FEMALE	FEMALE	FEMALE	FEMALE	0.0892584	0.240338	0.223369	0.272213	45.0016	39.3764	72.7258	50.6268	0.175445	0.570672	0.563766	0.56884	0.00136705	0.00461894	0.00328947	0.0040568	475	147.5	175	157.5
G6AE8	G6AE8	G6AE8	G6AE8	23	23	23	23	93	93	93	93	101.655	83.9762	82.7708	82.7708	FEMALE	FEMALE	FEMALE	FEMALE	0.11375	0.160596	0.290189	0.0936505	38.171	66.297	55.0466	41.3854	0.290274	0.581553	0.570431	0.388595	0.00174216	0.00308642	0.0042735	0.00139567	442.5	210	137.5	610
G6AE8	G6AE8	G6AE8	G6AE8	23	23	23	23	93	93	93	93	101.655	83.9762	82.7708	82.7708	FEMALE	FEMALE	FEMALE	FEMALE	0.0730341	0.171162	0.250108	0.249445	40.18	67.9042	28.5278	59.8682	0.248793	0.722385	0.413446	0.575656	0.00111857	0.00328947	0.00368324	0.00371747	732.5	210	202.5	165
G6AE8	G6AE8	G6AE8	G6AE8	23	23	23	23	93	93	93	93	101.655	83.9762	82.7708	83.9762	FEMALE	FEMALE	FEMALE	FEMALE	0.13631	0.178501	0.0921985	0.118696	28.126	38.9746	58.261	63.4844	0.166426	0.493349	0.574	0.556881	0.00208768	0.00343053	0.00135777	0.00382409	310	212.5	635	147.5
G6AE8	G6AE8	G6AE8	G6AE8	23	23	23	23	93	93	93	93	101.655	89.6014	82.7708	83.9762	FEMALE	FEMALE	FEMALE	FEMALE	0.0817178	0.190824	0.2548	0.128526	68.7078	63.8862	67.5024	74.333	0.270503	0.383701	0.523274	0.652044	0.00125156	0.00303951	0.00375235	0.00414079	545	162.5	137.5	127.5
G6AE8	G6AE8	G6AE8	G6AE8	23	23	23	23	93	93	93	93	82.7708	89.6014	83.9762	83.9762	FEMALE	FEMALE	FEMALE	FEMALE	0.248324	0.13245	0.192368	0.125919	65.0916	39.7782	72.324	67.9042	0.611189	0.412209	0.595259	0.526389	0.00371747	0.0021097	0.003861	0.0040568	162.5	377.5	137.5	117.5
G6AE8	G6AE8	G6AE8	G6AE8	23	23	23	23	93	93	93	93	82.7708	89.6014	83.9762	83.9762	FEMALE	FEMALE	FEMALE	FEMALE	0.216179	0.213542	0.21292	0.104685	65.8952	56.6538	73.1276	47.4124	0.449797	0.51976	0.566881	0.518168	0.00323625	0.00340136	0.0042735	0.00337268	162.5	185	105	205
G6AE8	G6AE8	G6AE8	G6AE8	23	23	23	23	93	93	93	93	82.7708	89.6014	83.9762	83.9762	FEMALE	FEMALE	FEMALE	FEMALE	0.270991	0.237808	0.175434	0.116469	61.0736	61.4754	43.3944	53.0376	0.535733	0.527686	0.317908	0.509977	0.0040568	0.00378788	0.00352113	0.00375235	132.5	147.5	147.5	162.5
G6AE8	G6AE8	G6AE8	G6AE8	23	23	23	23	93	93	93	93	82.7708	89.6014	83.9762	83.9762	FEMALE	FEMALE	FEMALE	FEMALE	0.28855	0.138285	0.206307	0.109292	49.0196	50.225	56.6538	70.315	0.521485	0.450448	0.486299	0.534715	0.00431965	0.00220264	0.00414079	0.00352113	137.5	342.5	125	152.5
G6AE8	G6AE8	G6AE8	G6AE8	23	23	23	23	93	93	93	93	82.7708	89.6014	83.9762	83.9762	FEMALE	FEMALE	FEMALE	FEMALE	0.0945495	0.223024	0.152598	0.0411658	46.6088	59.8682	76.342	23.3044	0.427604	0.562143	0.495727	0.350442	0.00141543	0.0035524	0.00306279	0.00132626	597.5	175	172.5	687.5
G6AE8	G6AE8	G6AE8	G6AE8	23	23	23	23	93	93	93	93	82.7708	89.6014	83.9762	89.6014	FEMALE	FEMALE	FEMALE	FEMALE	0.212736	0.217236	0.185216	0.154822	69.1096	61.4754	34.9566	39.7782	0.557335	0.485972	0.281908	0.364938	0.00318471	0.00346021	0.00371747	0.00262123	190	162.5	145	272.5
G6AE8	G6AE8	G6AE8	G6AE8	23	23	23	23	93	93	93	93	82.7708	82.7708	89.6014	89.6014	FEMALE	FEMALE	FEMALE	FEMALE	0.248324	0.200146	0.258664	0.134544	69.1096	52.234	44.198	54.6448	0.593215	0.586899	0.526167	0.449751	0.00371747	0.00375235	0.00422833	0.0022779	152.5	177.5	152.5	317.5
G6AE8	G6AE8	G6AE8	G6AE8	23	23	23	23	93	93	93	93	83.9762	82.7708	89.6014	89.6014	FEMALE	FEMALE	FEMALE	FEMALE	0.0913855	0.225535	0.110923	0.221631	72.7258	66.6988	40.9836	46.6088	0.53279	0.585077	0.359505	0.554867	0.00368324	0.00422833	0.00181324	0.00375235	135	122.5	437.5	182.5
G6AE8	G6AE8	G6AE8	G6AE8	23	23	23	23	93	93	93	93	83.9762	82.7708	89.6014	89.6014	FEMALE	FEMALE	FEMALE	FEMALE	0.108346	0.225535	0.223263	0.252413	73.1276	38.5728	50.225	47.0106	0.627705	0.50422	0.46078	0.452025	0.00436681	0.00422833	0.00364964	0.0042735	112.5	160	165	130
G6AE8	G6AE8	G6AE8	G6AE8	23	23	23	23	93	93	93	93	83.9762	82.7708	89.6014	89.6014	FEMALE	FEMALE	FEMALE	FEMALE	0.123132	0.0553309	0.223263	0.11604	61.8772	37.3674	65.0916	61.4754	0.676254	0.488463	0.583781	0.434455	0.00496278	0.00103734	0.00364964	0.00196464	110	887.5	162.5	367.5
G6AE8	G6AE8	G6AE8	G6AE8	23	23	23	23	93	93	93	93	83.9762	82.7708	89.6014	89.6014	FEMALE	FEMALE	FEMALE	FEMALE	0.0809499	0.203973	0.126393	0.22373	48.6178	73.1276	50.6268	59.0646	0.400147	0.627705	0.260963	0.44916	0.00326264	0.00382409	0.00206612	0.00378788	185	145	290	132.5
G6AE8	G6AE8	G6AE8	G6AE8	23	23	23	23	93	93	93	93	83.9762	82.7708	89.6014	89.6014	FEMALE	FEMALE	FEMALE	FEMALE	0.0742849	0.181425	0.215402	0.204376	72.7258	52.234	61.0736	53.4394	0.395249	0.50225	0.473439	0.449071	0.00299401	0.00340136	0.00352113	0.00346021	150	190	155	170
G6AE8	G6AE8	G6AE8	G6AE8	23	23	23	23	93	93	93	93	83.9762	82.7708	89.6014	82.7708	FEMALE	FEMALE	FEMALE	FEMALE	0.10491	0.0669667	0.227413	0.165751	57.0556	53.8412	55.8502	59.0646	0.479459	0.462156	0.416793	0.457865	0.00422833	0.00125549	0.00371747	0.00343053	117.5	680	135	162.5
G6AE8	G6AE8	G6AE8	G6AE8	23	23	23	23	93	93	93	93	83.9762	82.7708	82.7708	82.7708	FEMALE	FEMALE	FEMALE	FEMALE	0.0449885	0.0530586	0.188724	0.200068	15.6702	40.18	54.243	52.6358	0.336994	0.352456	0.475816	0.545449	0.00181324	0.00163532	0.00378788	0.00414079	505	497.5	150	145
G6AE8	G6AE8	G6AE8	G6AE8	23	23	23	23	93	93	93	93	89.6014	82.7708	82.7708	82.7708	FEMALE	FEMALE	FEMALE	FEMALE	0.171254	0.0622154	0.21997	0.20871	36.162	51.8322	60.6718	57.0556	0.4305	0.475525	0.597752	0.576319	0.00286533	0.00191755	0.00441501	0.00431965	265	412.5	125	132.5
G6AE8	G6AE8	G6AE8	G6AE8	23	23	23	23	93	93	93	93	89.6014	82.7708	82.7708	82.7708	FEMALE	FEMALE	FEMALE	FEMALE	0.136925	0.118414	0.21997	0.155109	60.27	66.297	43.7962	30.9386	0.506471	0.724557	0.442386	0.432708	0.00229095	0.00364964	0.00441501	0.00321027	317.5	182.5	127.5	240
G6AE8	G6AE8	G6AE8	G6AE8	23	23	23	23	93	93	93	93	89.6014	82.7708	82.7708	82.7708	FEMALE	FEMALE	FEMALE	FEMALE	0.190343	0.14648	0.158673	0.0518695	66.6988	57.4574	12.4558	58.6628	0.517045	0.62795	0.220457	0.492965	0.00318471	0.00451467	0.00318471	0.00107354	185	130	257.5	812.5
G6AE8	G6AE8	G6AE8	G6AE8	23	23	23	23	93	93	93	93	89.6014	82.7708	82.7708	82.7708	FEMALE	FEMALE	FEMALE	FEMALE	0.276064	0.117343	0.0697804	0.183017	29.7332	55.8502	44.198	67.9042	0.4018	0.645667	0.240207	0.471557	0.00461894	0.00361664	0.00140056	0.00378788	142.5	190	530	120
G6AE8	G6AE8	G6AE8	G6AE8	23	23	23	23	93	93	93	93	89.6014	82.7708	82.7708	82.7708	FEMALE	FEMALE	FEMALE	FEMALE	0.118587	0.138655	0.21292	0.0660512	63.4844	59.8682	68.7078	42.5908	0.448653	0.604729	0.6027	0.323884	0.00198413	0.0042735	0.0042735	0.00136705	362.5	135	120	600
G6AE8	G6AE8	G6AE8	G6AE8	23	23	23	23	93	93	93	93	89.6014	82.7708	82.7708	82.7708	FEMALE	FEMALE	FEMALE	FEMALE	0.226393	0.149863	0.176992	0.0408021	63.0826	25.3134	49.8232	47.0106	0.519198	0.429041	0.365005	0.350825	0.00378788	0.00461894	0.0035524	0.00182149	142.5	157.5	145	415
G6AE8	G6AE8	G6AE8	G6AE8	23	23	23	23	93	94	93	93	89.6014	91.6104	82.7708	82.7708	FEMALE	FEMALE	FEMALE	FEMALE	0.205035	0.309117	0.0643711	0.0342513	57.0556	82.369	47.4124	37.3674	0.489748	0.853565	0.425223	0.359302	0.00343053	0.00515464	0.00129199	0.00152905	175	97.5	662.5	550
G6AE8	G6AE8	G6AE8	G6AE8	23	23	23	23	93	94	93	93	82.7708	91.6104	82.7708	82.7708	FEMALE	FEMALE	FEMALE	FEMALE	0.079899	0.305184	0.0791724	0.0611196	51.4304	67.1006	29.7332	56.252	0.441463	0.630053	0.260818	0.554207	0.00382409	0.00508906	0.00164204	0.00272851	145	90	495	265
G6AE8	G6AE8	G6AE8	G6AE8	23	23	23	23	93	94	93	93	82.7708	91.6104	82.7708	82.7708	FEMALE	FEMALE	FEMALE	FEMALE	0.0769562	0.286931	0.0804942	0.0988978	71.1186	87.5924	49.0196	67.9042	0.530736	0.822464	0.449721	0.637598	0.00368324	0.00478469	0.00166945	0.00441501	137.5	102.5	490	120
G6AE8	G6AE8	G6AE8	G6AE8	23	23	23	23	93	94	93	93	82.7708	91.6104	82.7708	82.7708	FEMALE	FEMALE	FEMALE	FEMALE	0.106329	0.330406	0.148815	0.0832727	49.4214	86.387	73.1276	51.8322	0.555297	0.830644	0.614518	0.523558	0.00508906	0.00550964	0.00308642	0.00371747	107.5	77.5	205	170
G6AE8	G6AE8	G6AE8	G6AE8	23	23	23	23	93	94	93	93	82.7708	91.6104	82.7708	82.7708	FEMALE	FEMALE	FEMALE	FEMALE	0.0769562	0.280227	0.217679	0.0927551	32.9476	45.4034	55.8502	60.6718	0.360083	0.540517	0.500899	0.556622	0.00368324	0.0046729	0.00451467	0.00414079	180	130	110	132.5
G6AE8	G6AE8	G6AE8	G6AE8	23	23	23	23	93	94	93	93	82.7708	94.0212	82.7708	82.7708	FEMALE	FEMALE	FEMALE	FEMALE	0.0206561	0.0219303	0.166837	0.100002	81.5654	43.3944	63.8862	48.6178	0.529645	0.380653	0.525812	0.562055	0.000988631	0.000347645	0.00346021	0.00446429	857.5	2762.5	167.5	137.5
G6AE8	G6AE8	G6AE8	G6AE8	23	23	23	23	93	94	93	93	82.7708	94.0212	82.7708	82.7708	FEMALE	FEMALE	FEMALE	FEMALE	0.0943278	0.113356	0.230699	0.173646	59.8682	20.4918	48.6178	6.4288	0.536935	0.320184	0.517211	0.1312	0.00451467	0.00179695	0.00478469	0.00775194	110	492.5	115	80
G6AE8	G6AE8	G6AE8	G6AE8	23	23	23	23	93	94	93	93	82.7708	94.0212	82.7708	82.7708	FEMALE	FEMALE	FEMALE	FEMALE	0.0755646	0.245936	0.21525	0.0462817	19.6882	31.7422	28.126	26.9206	0.307628	0.377883	0.316022	0.420634	0.00361664	0.00389864	0.00446429	0.00206612	212.5	172.5	135	420
G6AE8	G6AE8	G6AE8	G6AE8	23	23	23	23	93	94	93	94	82.7708	94.0212	82.7708	91.6104	FEMALE	FEMALE	FEMALE	FEMALE	0.0384074	0.145352	0.07758	0.064984	16.8756	50.6268	58.6628	85.5834	0.207063	0.52463	0.526124	0.767564	0.00183824	0.00230415	0.00160901	0.000883783	462.5	337.5	510	1020
G6AE8	G6AE8	G6AE8	G6AE8	23	23	23	23	93	94	94	94	82.7708	94.0212	91.6104	91.6104	FEMALE	FEMALE	FEMALE	FEMALE	0.0246296	0.16755	0.14635	0.39426	33.7512	71.5204		77.1456	0.316913	0.613909		0.799436	0.00160256	0.00265604	0.00175747	0.00536193	517.5	260	522.5	90
G6AE8	G6AE8	G6AE8	G6AE8	23	23	23	23	93	94	94	94	82.7708	94.0212	91.6104	91.6104	FEMALE	FEMALE	FEMALE	FEMALE	0.123942	0.245936	0.140783	0.347657	10.045	64.6898	67.9042	71.9222	0.205	0.580178	0.70367	0.708593	0.00806452	0.00389864	0.00169062	0.00472813	75	145	495	110
G6AE8	G6AE8	G6AE8	G6AE8	23	23	23	23	93	94	94	94	82.7708	94.0212	91.6104	91.6104	FEMALE	FEMALE	FEMALE	FEMALE	0.0456727	0.199313	0.440598	0.356075	61.8772	57.4574	80.7618	93.2176	0.46177	0.454209	0.795683	0.817698	0.00297177	0.00315956	0.00529101	0.00484262	202.5	190	87.5	92.5
G6AE8	G6AE8	G6AE8	G6AE8	23	23	23	23	93	94	94	94	82.7708	90.8068	91.6104	91.6104	FEMALE	FEMALE	FEMALE	FEMALE	0.0744254	0.2009	0.403259	0.356075	62.6808	32.5458	74.333	75.1366	0.617545	0.439808	0.611794	0.593965	0.00484262	0.00263852	0.00484262	0.00484262	105	305	85	80
G6AE8	G6AE8	G6AE8	G6AE8	23	23	23	23	93	94	94	94	82.7708	90.8068	91.6104	94.0212	FEMALE	FEMALE	FEMALE	FEMALE	0.0555835	0.198284	0.375951	0.240845	58.261	53.4394	93.6194	53.8412	0.426821	0.51384	0.740074	0.4018	0.00361664	0.00260417	0.00451467	0.00389864	140	280	95	122.5
G6AE8	G6AE8	G6AE8	G6AE8	23	23	23	23	93	94	94	94	82.7708	90.8068	91.6104	94.0212	FEMALE	FEMALE	FEMALE	FEMALE	0.0649846	0.224605	0.471802	0.0205136	62.279	79.1546	83.1726	50.6268	0.534584	0.651478	0.745943	0.345575	0.00422833	0.00294985	0.00566572	0.00033206	120	217.5	65	2865
G6AE8	G6AE8	G6AE8	G6AE8	23	23	23	23	93	94	94	94	82.7708	90.8068	94.0212	94.0212	FEMALE	FEMALE	FEMALE	FEMALE	0.0718171	0.299768	0.1969	0.0827552	37.7692	67.5024	20.8936	32.9476	0.436638	0.619288	0.216514	0.370198	0.0046729	0.00393701	0.00306279	0.00133958	127.5	145	230	657.5
G6AE8	G6AE8	G6AE8	G6AE8	23	23	23	23	93	94	94	94	82.7708	90.8068	94.0212	94.0212	FEMALE	FEMALE	FEMALE	FEMALE	0.0531794	0.305788	0.0254707	0.154829	18.081	76.7438	28.126	72.324	0.252881	0.594913	0.291461	0.469636	0.00346021	0.00401606	0.000396197	0.00250627	217.5	120	2427.5	245
G6AE8	G6AE8	G6AE8	G6AE8	23	23	23	23	93	94	94	94	82.7708	87.5924	94.0212	94.0212	FEMALE	FEMALE	FEMALE	FEMALE	0.0463615	0.251458	0.153432	0.186355	26.5188	67.1006	34.153	69.5114	0.267867	0.588602	0.373257	0.560576	0.00301659	0.00441501	0.00238663	0.00301659	232.5	112.5	327.5	207.5
G6AE8	G6AE8	G6AE8	G6AE8	23	23	23	23	94	94	94	94	91.6104	87.5924	94.0212	94.0212	FEMALE	FEMALE	FEMALE	FEMALE	0.0786807	0.266146	0.156228	0.21376		34.9566	19.2864	61.0736		0.362245	0.205174	0.513224	0.00103199	0.0046729	0.00243013	0.00346021	882.5	117.5	317.5	170
G6AE8	G6AE8	G6AE8	G6AE8	23	23	23	23	94	94	94	94	91.6104	87.5924	94.0212	94.0212	FEMALE	FEMALE	FEMALE	FEMALE	0.383123	0.066304	0.142388	0.182232	81.1636	45.4034	56.252	57.4574	0.780419	0.426323	0.419791	0.4729	0.00502513	0.00116414	0.00221484	0.00294985	95	752.5	317.5	217.5
G6AE8	G6AE8	G6AE8	G6AE8	23	23	23	23	94	94	94	94	91.6104	87.5924	94.0212	90.8068	FEMALE	FEMALE	FEMALE	FEMALE	0.420064	0.198796	0.17305	0.182187	77.9492	61.8772	69.9132	48.216	0.767972	0.567681	0.379963	0.499648	0.00550964	0.0034904	0.00269179	0.00258732	80	177.5	187.5	290
G6AE8	G6AE8	G6AE8	G6AE8	23	23	23	23	94	94	94	94	91.6104	87.5924	94.0212	90.8068	FEMALE	FEMALE	FEMALE	FEMALE	0.322374	0.188906	0.248216	0.168056	83.1726	37.3674	65.0916	43.7962	0.713928	0.419858	0.494993	0.537377	0.00422833	0.00331675	0.003861	0.00238663	120	212.5	127.5	337.5
G6AE8	G6AE8	G6AE8	G6AE8	23	23	23	23	94	94	94	94	91.6104	87.5924	94.0212	90.8068	FEMALE	FEMALE	FEMALE	FEMALE	0.414356	0.113006	0.1969	0.194787	90.8068	57.0556	61.0736	59.4664	0.814411	0.523446	0.361382	0.600671	0.00543478	0.00198413	0.00306279	0.00276625	72.5	395	157.5	262.5
G6AE8	G6AE8	G6AE8	G6AE8	23	23	23	23	94	94	94	94	91.6104	87.5924	90.8068	90.8068	FEMALE	FEMALE	FEMALE	FEMALE	0.392998	0.182842	0.232959	0.291575	73.5294	50.6268	53.8412	66.6988	0.674582	0.464466	0.387347	0.560494	0.00515464	0.00321027	0.00303951	0.00414079	85	202.5	190	122.5
G6AE8	G6AE8	G6AE8	G6AE8	23	23	23	23	94	94	94	94	94.0212	88.7978	90.8068	90.8068	FEMALE	FEMALE	FEMALE	FEMALE	0.271509	0.364547	0.236554	0.269275	55.8502	93.2176	32.5458	71.5204	0.469329	0.817698	0.411972	0.627372	0.0041841	0.00441501	0.00308642	0.00382409	120	112.5	245	147.5
G6AE8	G6AE8	G6AE8	G6AE8	23	23	23	23	94	94	94	94	94.0212	88.7978	90.8068	90.8068	FEMALE	FEMALE	FEMALE	FEMALE	0.0216194	0.420203	0.440479	0.277226	55.0466	85.5834	12.8576	66.6988	0.257227	0.864479	0.2624	0.611916	0.000333167	0.00508906	0.00574713	0.00393701	2787.5	97.5	125	145
G6AE8	G6AE8	G6AE8	G6AE8	23	23	23	23	94	94	94	94	94.0212	88.7978	90.8068	87.5924	FEMALE	FEMALE	FEMALE	FEMALE	0.0899386	0.377032	0.203568	0.261887	43.7962	79.1546	60.27	60.6718	0.320851	0.84207	0.284965	0.628723	0.001386	0.00456621	0.00265604	0.00446429	585	125	165	127.5
G6AE8	G6AE8	G6AE8	G6AE8	23	23	23	23	94	94	94	94	94.0212	88.7978	90.8068	87.5924	FEMALE	FEMALE	FEMALE	FEMALE	0.421368	0.360567	0.29592	0.24291	16.4738	79.9582	70.315	69.9132	0.180042	0.787766	0.578724	0.531659	0.00649351	0.00436681	0.003861	0.00414079	62.5	127.5	137.5	110
G6AE8	G6AE8	G6AE8	G6AE8	23	23	23	23	94	94	94	94	94.0212	87.5924	90.8068	87.5924	FEMALE	FEMALE	FEMALE	FEMALE	0.226495	0.22398	0.277191	0.0870368	57.4574	84.378	76.7438	18.4828	0.454209	0.922164	0.515059	0.249768	0.0034904	0.00522193	0.00361664	0.00148368	160	100	127.5	600
G6AE8	G6AE8	G6AE8	G6AE8	23	23	23	23	94	94	94	94	94.0212	87.5924	90.8068	87.5924	FEMALE	FEMALE	FEMALE	FEMALE	0.187275	0.215538	0.29592	0.132872	72.7258	86.387	73.5294	51.8322	0.553048	0.851103	0.493486	0.475525	0.002886	0.00502513	0.003861	0.00226501	215	97.5	110	332.5
G6AE8	G6AE8	G6AE8	G6AE8	23	23	23	23	94	94	94	94	94.0212	87.5924	87.5924	87.5924	FEMALE	FEMALE	FEMALE	FEMALE	0.236827	0.210256	0.159819	0.210261	64.288	80.36	58.6628	61.4754	0.470974	0.832746	0.503543	0.450369	0.00364964	0.00490196	0.00263852	0.00358423	137.5	107.5	262.5	142.5
G6AE8	G6AE8	G6AE8	G6AE8	23	23	23	23	94	94	94	94	94.0212	87.5924	87.5924	87.5924	FEMALE	FEMALE	FEMALE	FEMALE	0.178271	0.191483	0.243258	0.116394	65.0916	72.324	73.9312	31.3404	0.3969	0.730545	0.584436	0.384545	0.00274725	0.00446429	0.00401606	0.00198413	200	125	122.5	422.5
G6AE8	G6AE8	G6AE8	G6AE8	23	23	23	23	94	94	94	94	90.8068	87.5924	87.5924	87.5924	FEMALE	FEMALE	FEMALE	FEMALE	0.166727	0.172258	0.300602	0.210261	61.0736	38.9746	40.5818	53.8412	0.473439	0.689816	0.497936	0.462156	0.00216685	0.00401606	0.00496278	0.00358423	332.5	192.5	120	162.5
G6AE8	G6AE8	G6AE8	G6AE8	23	23	23	23	94	94	94	94	90.8068	90.405	87.5924	88.7978	FEMALE	FEMALE	FEMALE	FEMALE	0.247013	0.190001	0.0711349	0.353721	45.0016	66.6988	41.7872	90.0032	0.588256	0.611916	0.366554	0.789502	0.00321027	0.00361664	0.0011744	0.0042735	235	167.5	737.5	120
G6AE8	G6AE8	G6AE8	G6AE8	23	23	23	23	94	94	94	94	90.8068	90.405	87.5924	88.7978	FEMALE	FEMALE	FEMALE	FEMALE	0.151915	0.2009	0.178677	0.405739	60.27	71.9222	67.1006	81.5654	0.433597	0.659837	0.465976	0.867717	0.00197433	0.00382409	0.00294985	0.00490196	367.5	152.5	195	110
G6AE8	G6AE8	G6AE8	G6AE8	23	23	23	23	94	94	94	94	90.8068	90.405	87.5924	88.7978	FEMALE	FEMALE	FEMALE	FEMALE	0.207119	0.202839	0.258852	0.369513	63.4844	69.1096	31.3404	91.6104	0.522505	0.593215	0.396714	0.769835	0.00269179	0.003861	0.0042735	0.00446429	250	142.5	155	105
G6AE8	G6AE8	G6AE8	G6AE8	23	23	23	23	94	94	94	94	90.8068	90.405	87.5924	88.7978	FEMALE	FEMALE	FEMALE	FEMALE	0.309015	0.183369	0.113963	0.373683	71.1186	63.8862	57.8592	72.7258	0.573537	0.485827	0.507537	0.773679	0.00401606	0.0034904	0.00188147	0.00451467	125	155	417.5	127.5
G6AE8	G6AE8	G6AE8	G6AE8	23	23	23	23	94	94	94	94	90.8068	90.405	87.5924	87.5924	FEMALE	FEMALE	FEMALE	FEMALE	0.291457	0.042921	0.181351	0.261754	77.1456	58.6628	57.8592	85.1816	0.598028	0.429764	0.358261	0.839228	0.00378788	0.000816993	0.00299401	0.00490196	135	1087.5	172.5	102.5
G6AE8	G6AE8	G6AE8	G6AE8	23	23	23	23	94	94	94	94	90.8068	90.405	88.7978	87.5924	FEMALE	FEMALE	FEMALE	FEMALE	0.275787	0.159682	0.336755	0.271745	75.1366	47.0106	89.1996	85.5834	0.504272	0.500113	0.734153	0.864479	0.00358423	0.00303951	0.00409836	0.00508906	130	235	122.5	97.5
G6AE8	G6AE8	G6AE8	G6AE8	23	23	23	23	94	94	94	94	87.5924	85.9852	88.7978	87.5924	FEMALE	FEMALE	FEMALE	FEMALE	0.237611	0.303346	0.397908	0.268331	63.8862	71.1186	86.7888	81.5654	0.57297	0.799085	0.814918	0.8036	0.00401606	0.00441501	0.00484262	0.00502513	137.5	137.5	100	97.5
G6AE8	G6AE8	G6AE8	G6AE8	23	23	23	23	94	94	94	94	87.5924	85.9852	88.7978	87.5924	FEMALE	FEMALE	FEMALE	FEMALE	0.255573	0.328745	0.370962	0.246641	67.9042	79.1546	92.414	81.9672	0.526389	0.743236	0.760609	0.719011	0.00431965	0.00478469	0.00451467	0.00461894	102.5	102.5	100	102.5
G6AE8	G6AE8	G6AE8	G6AE8	23	23	23	23	94	94	94	94	87.5924	85.9852	88.7978	87.5924	FEMALE	FEMALE	FEMALE	FEMALE	0.0849462	0.160158	0.375197	0.255492	20.8936	48.216	79.5564	48.6178	0.4264	0.651568	0.697863	0.704606	0.00143575	0.002331	0.00456621	0.00478469	647.5	355	105	140
G6AE8	G6AE8	G6AE8	G6AE8	23	23	23	23	94	94	94	94	87.5924	85.9852	88.7978	90.405	FEMALE	FEMALE	FEMALE	FEMALE	0.142911	0.2337	0.375197	0.192259	63.4844	59.0646	76.342	63.4844	0.42607	0.628347	0.684682	0.533482	0.00241546	0.00340136	0.00456621	0.00358423	265	200	107.5	160
G6AE8	G6AE8	G6AE8	G6AE8	23	23	23	23	94	94	94	94	87.5924	85.9852	87.5924	90.405	FEMALE	FEMALE	FEMALE	FEMALE	0.22411	0.191387	0.21368	0.201277	58.261	69.1096	84.7798	63.0826	0.534505	0.634033	0.856362	0.592325	0.00378788	0.00278552	0.00508906	0.00375235	155	250	97.5	160
[truncated: 8,185 more rows]

## Sheet: READ ME
This data set includes individual limb gait parameters, walking speed, and mouse metrics used to generate the linear mixed effects model in Figure 2. Data for the four paws (FR HR FL HL) are stored in separate columns for all variables; rows are organized stride-wise. The linear mixed model shown in Figure 2 uses speed-binned data (.05 m/s speed bins) from the FR paw, with a minimum stride count …
