# Supplementary material for: A quantitative framework for whole-body coordination reveals specific deficits in freely walking ataxic mice
Source: eLife journal article supplement (doi:10.7554/elife.07892), 2015-10-03
Supplement: supp [file elife_poa_e07892_Figure_2_figure_supplement_1.pdf › elife_poa_e07892_Figure_2_figure_supplement_1.pdf]

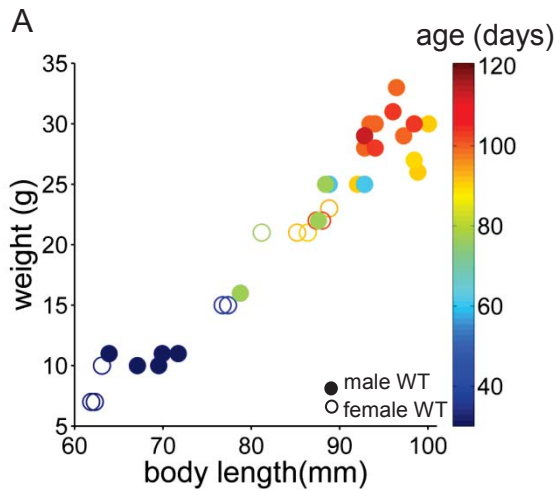

**B. Comparison of model fits for basic stride parameters**

| Y ~ fixed terms + (rt = random terms)                                | Y                  |                             |                             |                      |                             |                             |                            |                             |                             |                      |                             |                             |
|----------------------------------------------------------------------|--------------------|-----------------------------|-----------------------------|----------------------|-----------------------------|-----------------------------|----------------------------|-----------------------------|-----------------------------|----------------------|-----------------------------|-----------------------------|
|                                                                      | stride length (mm) |                             |                             | swing velocity (m/s) |                             |                             | cadence (s <sup>-1</sup> ) |                             |                             | stance duration (ms) |                             |                             |
|                                                                      | p-value            | r <sup>2</sup> <sub>m</sub> | r <sup>2</sup> <sub>c</sub> | p-value              | r <sup>2</sup> <sub>m</sub> | r <sup>2</sup> <sub>c</sub> | p-value                    | r <sup>2</sup> <sub>m</sub> | r <sup>2</sup> <sub>c</sub> | p-value              | r <sup>2</sup> <sub>m</sub> | r <sup>2</sup> <sub>c</sub> |
| Y ~ <b>speed</b> + (rt) <sup>a</sup>                                 | -                  | 0.68                        | 0.88                        | -                    | 0.94                        | 0.97                        | -                          | 0.81                        | 0.87                        | -                    | 0.84                        | 0.90                        |
| Y ~ <b>speed</b> + <b>gender</b> + (rt) <sup>b</sup>                 | 0.04               | 0.70                        | 0.88                        | 0.45                 | 0.94                        | 0.97                        | 0.17                       | 0.81                        | 0.87                        | 0.38                 | 0.84                        | 0.90                        |
| Y ~ <b>speed</b> + <b>age</b> + (rt) <sup>c</sup>                    | 6.38e-09           | 0.82                        | 0.87                        | 1.3e-4               | 0.95                        | 0.97                        | 1.03e-05                   | 0.83                        | 0.87                        | 3.99e-05             | 0.85                        | 0.90                        |
| Y ~ <b>speed</b> + <b>body length</b> + (rt) <sup>d</sup>            | 8.46e-13           | 0.83                        | 0.87                        | 5.95e-5              | 0.95                        | 0.97                        | 9.55e-09                   | 0.84                        | 0.87                        | 1.66e-08             | 0.87                        | 0.90                        |
| Y ~ <b>speed</b> + <b>weight</b> + (rt) <sup>e</sup>                 | 1.41e-12           | 0.83                        | 0.87                        | 4.08e-5              | 0.95                        | 0.97                        | 1.57e-07                   | 0.83                        | 0.87                        | 3.26e-07             | 0.86                        | 0.90                        |
| Y ~ <b>speed</b> + <b>weight</b> + <b>age</b> + (rt) <sup>f</sup>    | 0.72               | 0.83                        | 0.87                        | 0.61                 | 0.95                        | 0.97                        | 0.99                       | 0.83                        | 0.87                        | 0.70                 | 0.86                        | 0.90                        |
| Y ~ <b>speed</b> + <b>weight</b> + <b>gender</b> + (rt) <sup>g</sup> | 0.57               | 0.83                        | 0.87                        | 0.35                 | 0.95                        | 0.97                        | 0.87                       | 0.83                        | 0.97                        | 0.55                 | 0.86                        | 0.90                        |

Random terms = 1+speed | individuals

Equations were compared using a likelihood ratio test; statistical significance is represented in p-values. They were compared in the following order [a – b],

[a – c], [a – d], [a – e], [e – f] and [e – g]

r<sup>2</sup><sub>m</sub>: marginal ; r<sup>2</sup><sub>c</sub>: conditional were obtained from generalized linear mixed-effects models (Nakagawa 2013 ).

**C. Coefficients of speed and weight for basic stride parameters.**

| Y ~ fixed terms + (rt = random terms)              | coefficients |            | equations                                           |
|----------------------------------------------------|--------------|------------|-----------------------------------------------------|
|                                                    | speed (m/s)  | weight (g) | fixed terms                                         |
| stride length (mm) ~ speed + weight + (rt)         | 0.964        | 0.011      | exp(-0.263 + 0.303*log(speed) + 0.011*weight)*101.9 |
| swing velocity (m/s) ~ speed + weight + (rt)       | 1.294        | 0.003      | 0.179 + 1.294*speed + 0.003*weight                  |
| cadence (s <sup>-1</sup> ) ~ speed + weight + (rt) | 0.948        | -0.010     | exp(0.169 + 0.598*log(speed) - 0.010*weight)*0.0098 |
| stance duration (ms) ~ speed + weight + (rt)       | 1.006        | 0.013      | exp(-0.322 - 0.882*log(speed) + 0.013*weight)*39.36 |

Random terms = 1+speed | individuals
