# Supplementary figures and images for: A quantitative framework for whole-body coordination reveals specific deficits in freely walking ataxic mice
Source: eLife journal article supplement (doi:10.7554/elife.07892), 2015-10-03

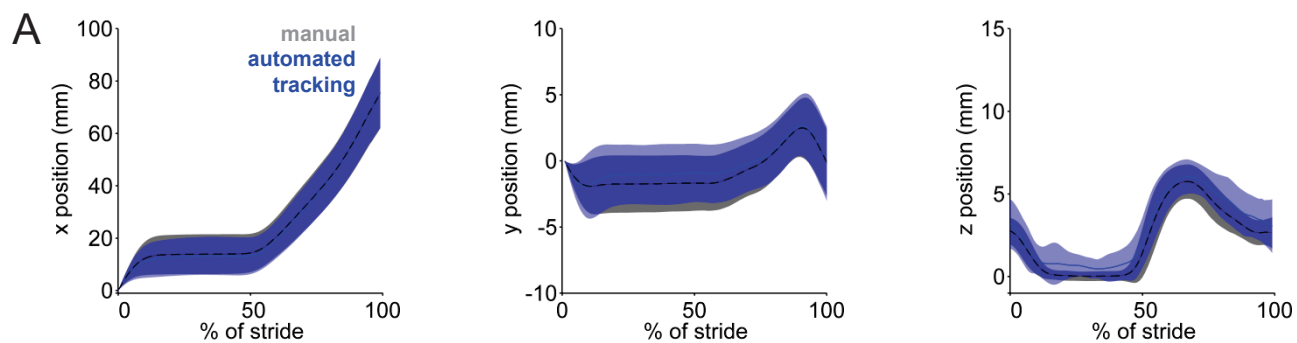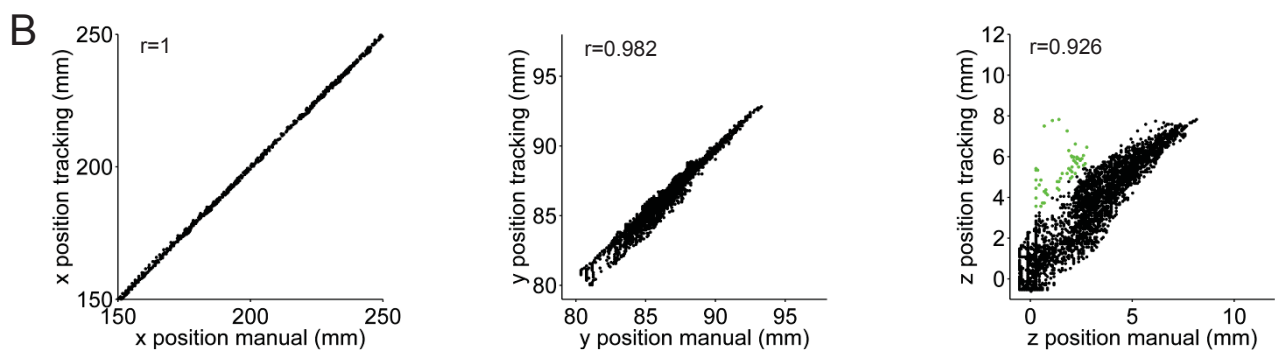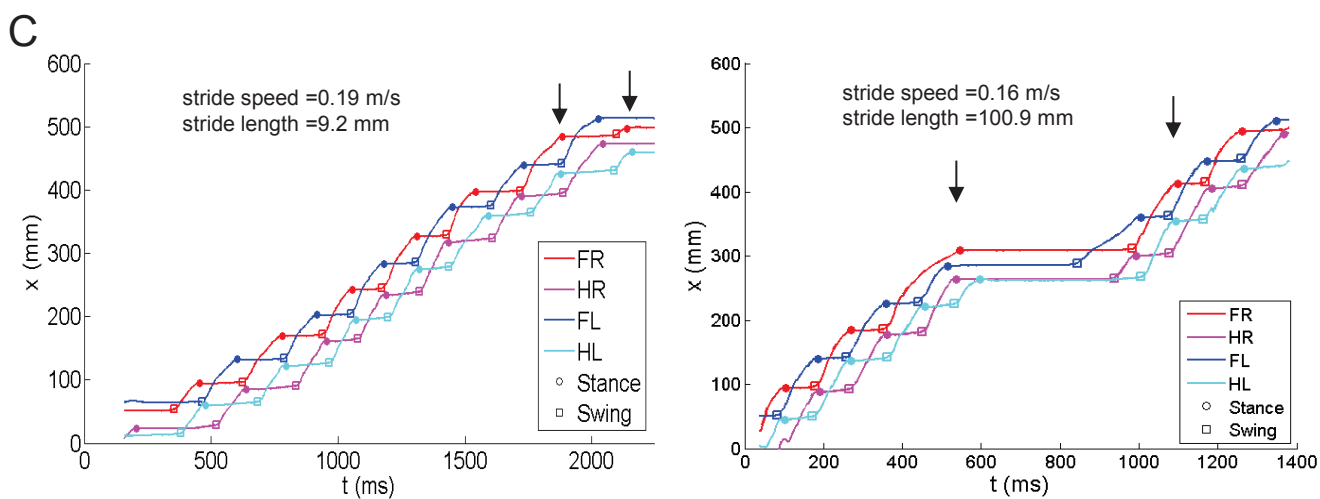

Supplement: supp [file elife_poa_e07892_Figure_1_figure_supplement_1.pdf › elife_poa_e07892_Figure_1_figure_supplement_1.pdf]

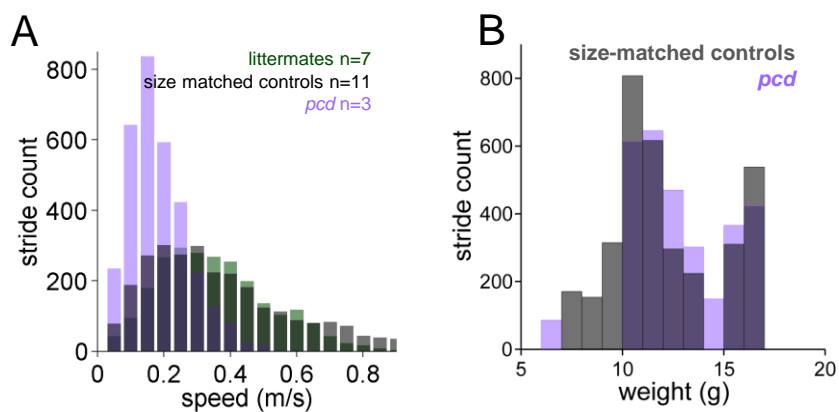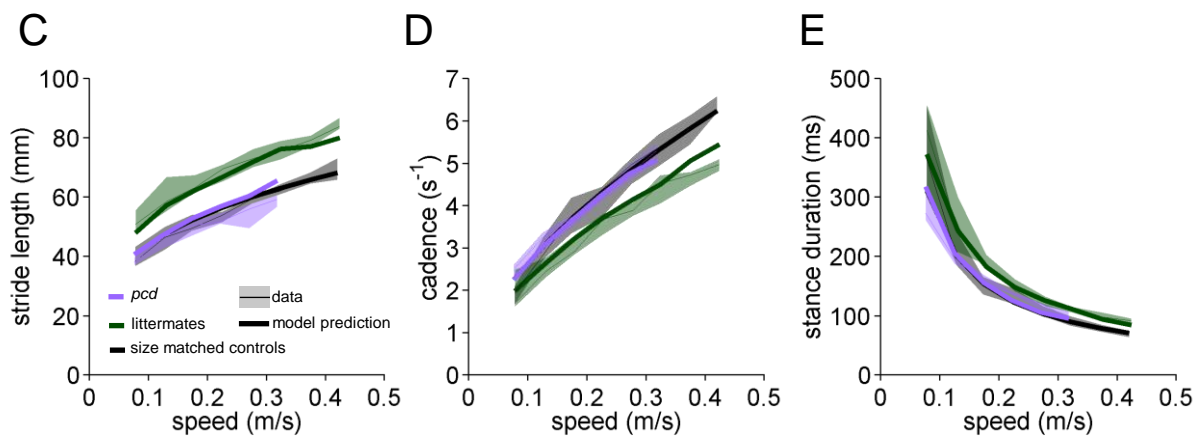

Supplement: supp [file elife_poa_e07892_Figure_3_figure_supplement_1.pdf › elife_poa_e07892_Figure_3_figure_supplement_1.pdf]

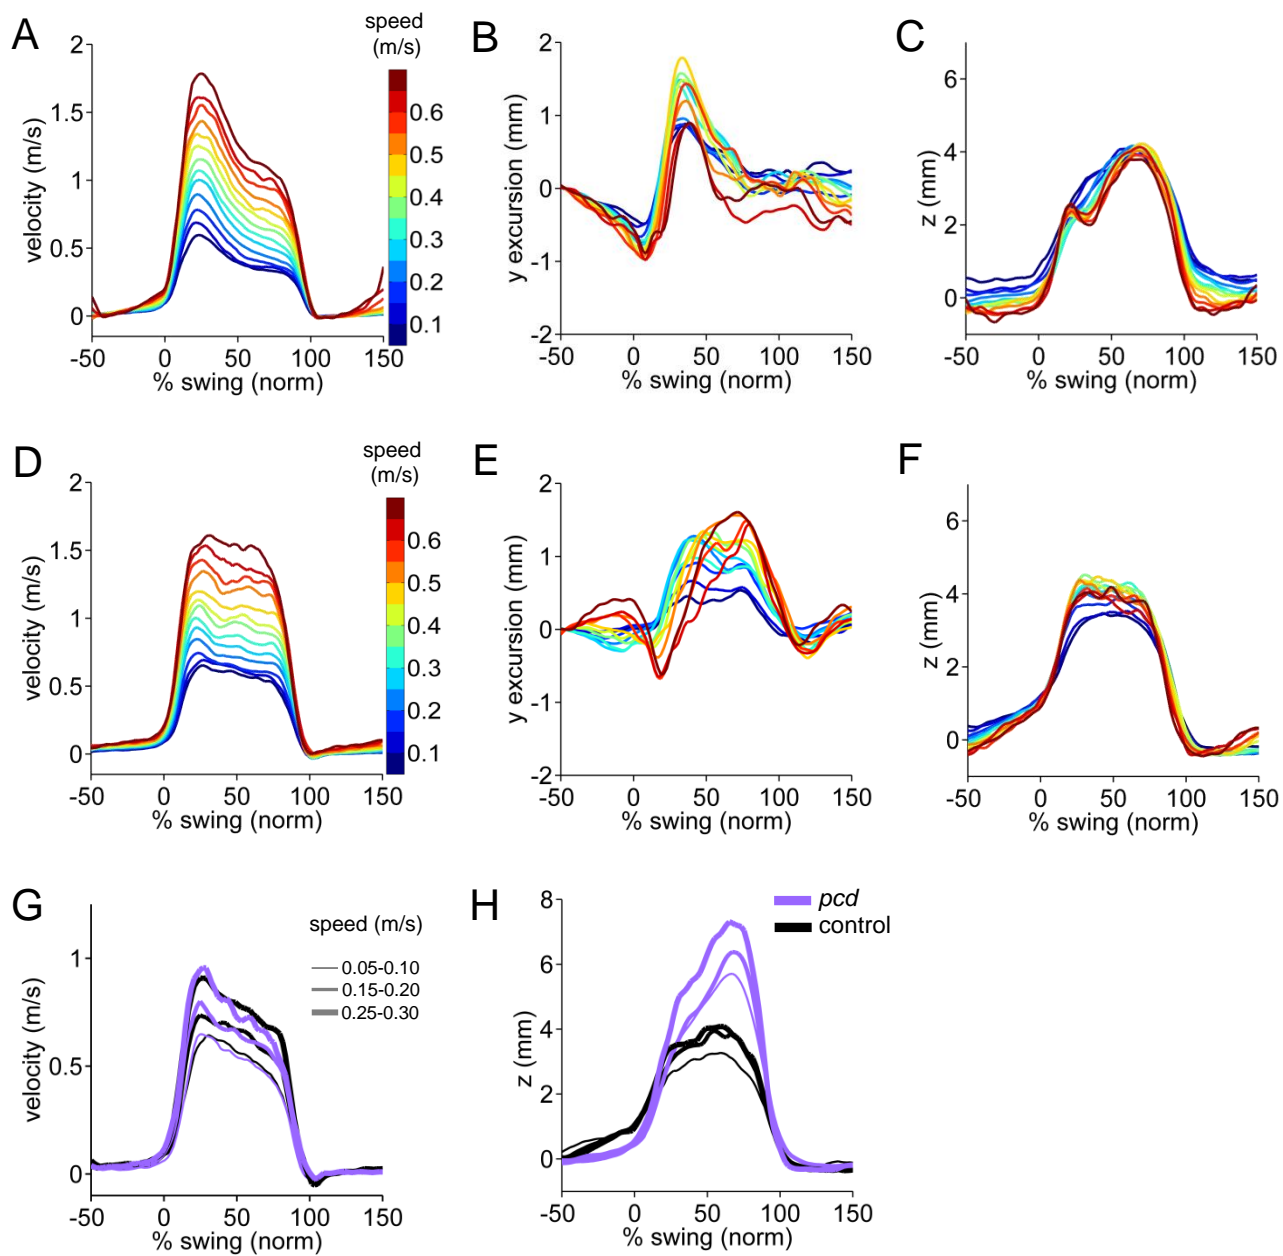

Supplement: supp [file elife_poa_e07892_Figure_3_figure_supplement_2.pdf › elife_poa_e07892_Figure_3_figure_supplement_2.pdf]

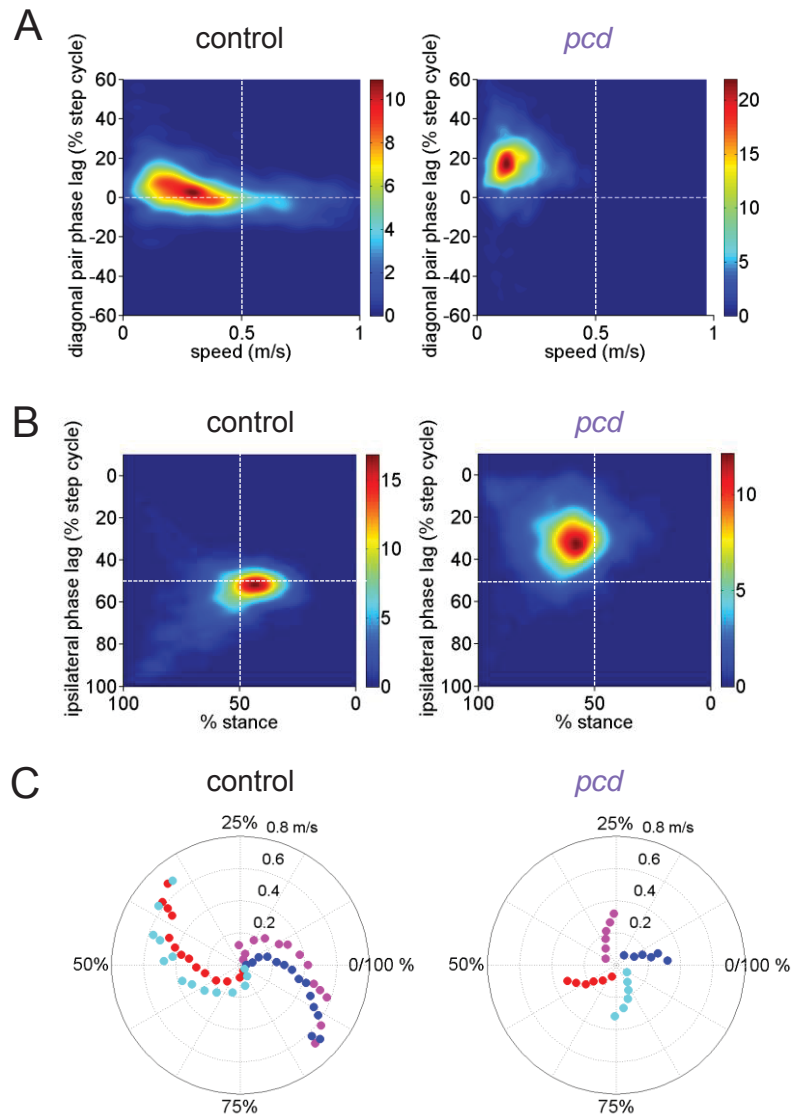

Supplement: supp [file elife_poa_e07892_Figure_4_figure_supplement_1.pdf › elife_poa_e07892_Figure_4_figure_supplement_1.pdf]

tail: *pcd* + size matched controls

nose: *pcd* +  
size matched control

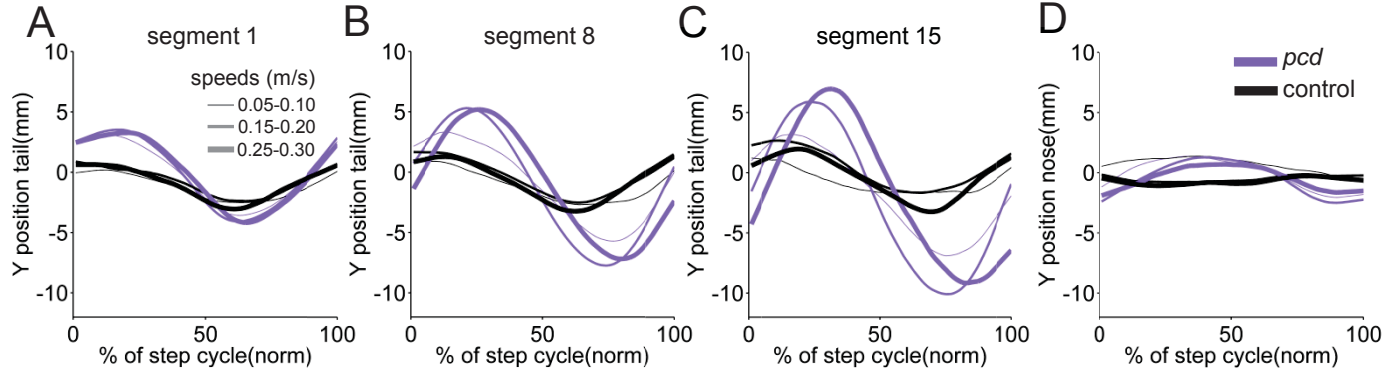

all tail segments *pcd*

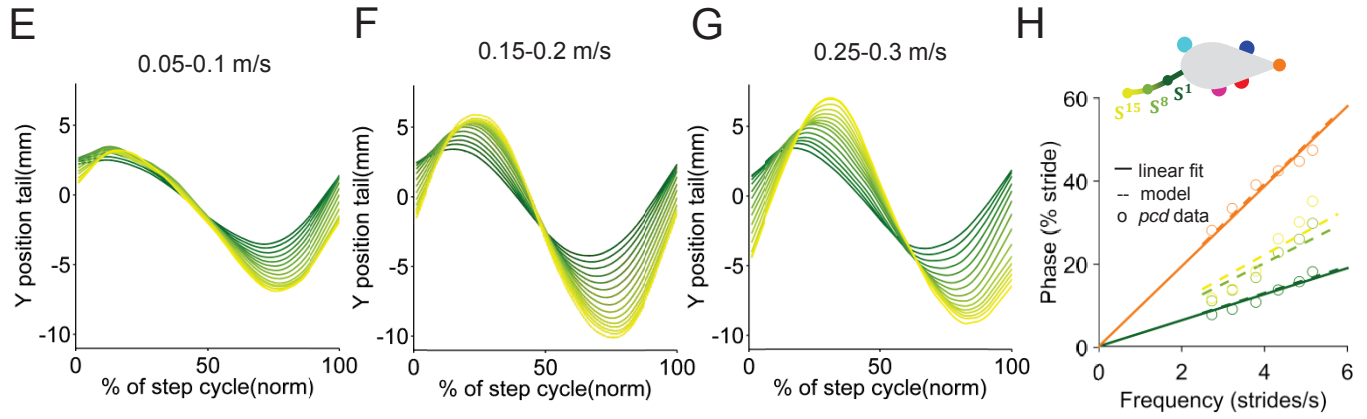

Supplement: supp [file elife_poa_e07892_Figure_5_figure_supplement_1.pdf › elife_poa_e07892_Figure_5_figure_supplement_1.pdf]

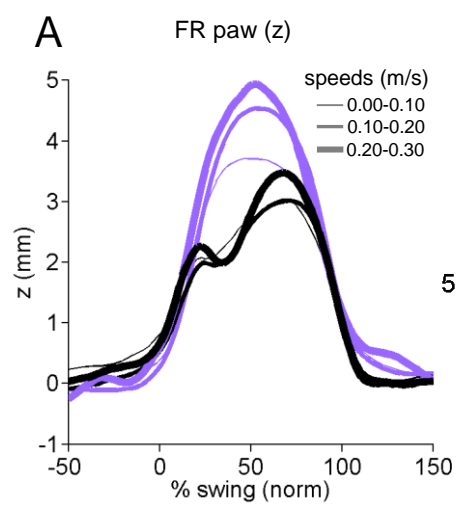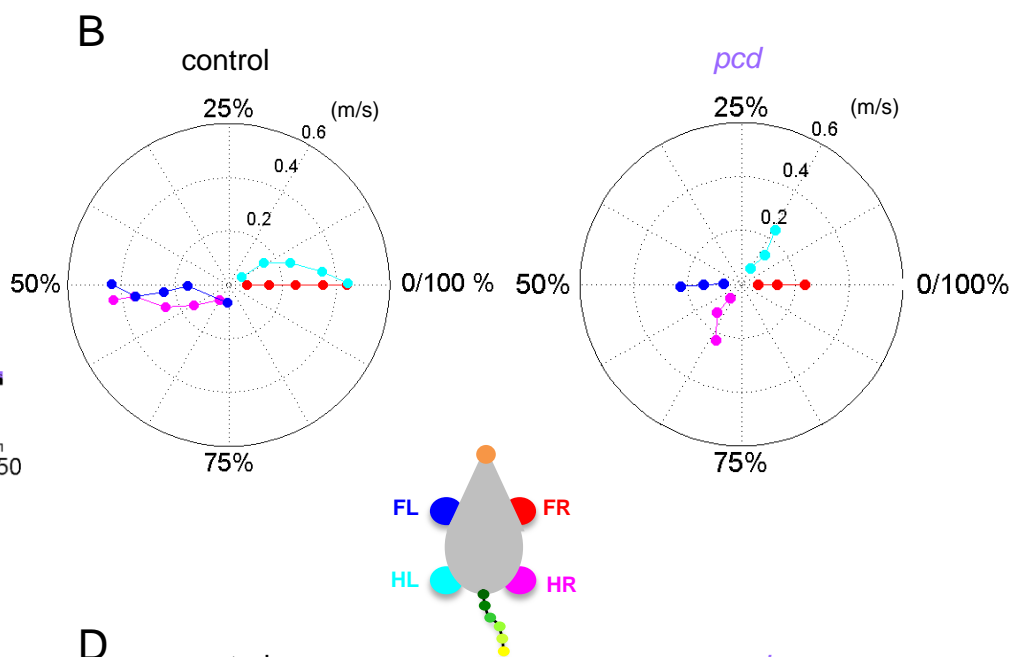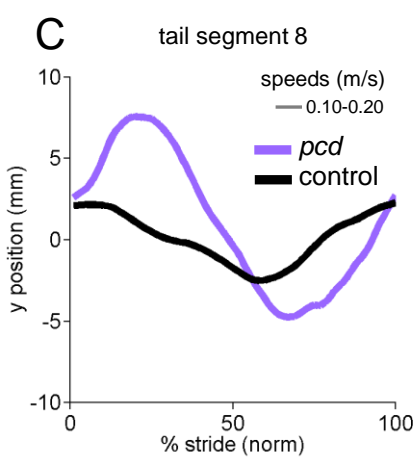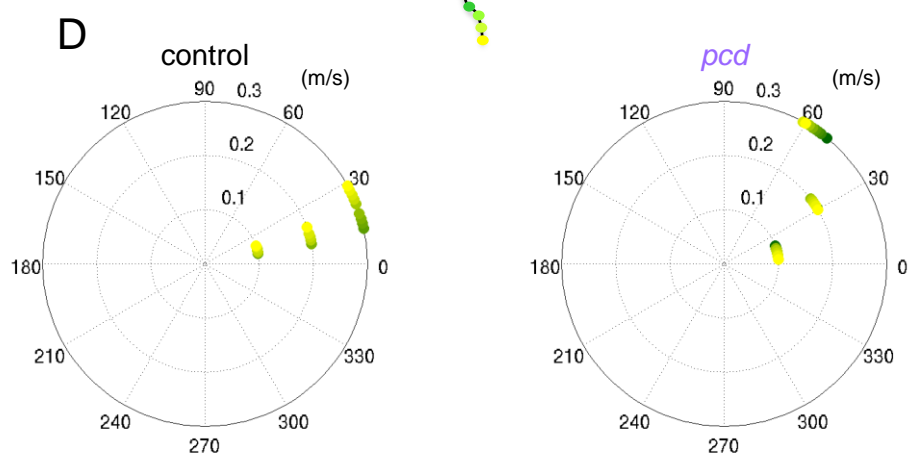

Supplement: supp [file elife_poa_e07892_Figure_5_figure_supplement_2.pdf › elife_poa_e07892_Figure_5_figure_supplement_2.pdf]
